# Supplementary material for: Direct formation of amide/peptide bonds from carboxylic acids: no traditional coupling reagents, 1-pot, and green
Source: Chem Sci. 2023 Feb 28;14(13):3462–9. doi: 10.1039/d3sc00198a (PMC10055766; doi:10.1039/d3sc00198a)

## Supporting Information

### **Direct formation of amide/peptide bonds from carboxylic acids: no traditional coupling reagents, 1-pot, and green**

Kaitlyn M. Freiberg, Rahul D. Kavthe, Rohan M. Thomas, David M. Fialho, Paris Dee, Matthew Scurria, Bruce H. Lipshutz\*

Department of Chemistry and Biochemistry, University of California, Santa Barbara, CA  
93106 USA

Phone: 805-893-2521

Fax: 805-893-8265

Email: [lipshutz@chem.ucsb.edu](mailto:lipshutz@chem.ucsb.edu)

Website: <https://lipshutz.chem.ucsb.edu/>

#### **Contents**

|                                                                               |     |
|-------------------------------------------------------------------------------|-----|
| 1. General information .....                                                  | S2  |
| 2. Synthesis of di-2-pyridyldithiocarbonate (DPDTC) .....                     | S2  |
| 3. Optimization of the reaction conditions .....                              | S3  |
| 3.1. Optimization of S-(2-pyridyl) thioester formation .....                  | S3  |
| 3.2. Optimization of amide bond formation from S-(2-pyridyl) thioesters ..... | S5  |
| 3.3. NMR Yield Calculations .....                                             | S10 |
| 4. One pot amide bond formation from carboxylic acid .....                    | S14 |
| 5. General Purification Procedures for amides .....                           | S15 |
| 5.1. General Purification Method for General Procedure A .....                | S15 |
| 5.2. General Purification Method for General Procedure B .....                | S15 |
| 5.3. General Purification Method for General Procedure C .....                | S15 |
| 6. Synthesis of starting materials .....                                      | S16 |
| 7. PMI and E Factor Calculations .....                                        | S17 |
| 8. Large Scale Reaction .....                                                 | S19 |
| 9. Recycle Study .....                                                        | S20 |
| 10. Multi-step, 1-pot: chemocatalysis sequence procedures .....               | S21 |
| 11. Analytical data .....                                                     | S24 |
| 12. References .....                                                          | S50 |
| 13. NMR Spectra .....                                                         | S52 |

## 1. General information

A solution of 2 wt % surfactant/H<sub>2</sub>O was prepared by dissolving the surfactant in degassed HPLC grade water and was stored under argon. TPGS-750-M was obtained from a contract manufacturer, but is also available from Sigma-Aldrich (catalog #733857). All commercially available reagents were purchased from Sigma-Aldrich, Combi-Blocks, Ambeed Inc., Acros Organics, BLD Pharma, Fischer Scientific, or ChemScene and used without further purification. Thin layer chromatography (TLC) was done using Silica Gel 60 F254 plates (Merck, 0.25 mm thick). The developed TLC plate was analyzed by a UV lamp (254 nm). The plates were further analyzed with the use of an aqueous ceric ammonium molybdate stain or ethanolic vanillin and developed with a heat gun. All commercially available reagents were used without further purification. Flash chromatography was performed using Silicycle Silicaflash® P60 unbonded grade silica.

<sup>1</sup>H, <sup>13</sup>C, and <sup>19</sup>F NMR were recorded at 25 °C on either an Agilent Technologies 400 MHz, a Bruker Avance III HD 400 MHz, or a Agilent Technologies 500 MHz, a Bruker Avance III HD 400 MHz spectrometer in CDCl<sub>3</sub>, DMSO-*d*<sub>6</sub>, or benzene-*d*<sub>6</sub> with residual CHCl<sub>3</sub> (<sup>1</sup>H = 7.26 ppm, <sup>13</sup>C = 77.16 ppm), DMSO (<sup>1</sup>H = 2.54 ppm, <sup>13</sup>C = 40.45 ppm), and benzene (<sup>1</sup>H = 7.16 ppm, <sup>13</sup>C = 128.06 ppm) as the internal standard. Chemical shifts are reported in parts per million (ppm, or Hz). The data presented will be reported as follows; chemical shift, multiplicity (s = singlet, bs = broad singlet, d = doublet, dd = doublet of doublet, t = triplet, q = quartet, quin = quintet, m = multiplet), coupling constant (if applicable), and integration. High-resolution mass analyses (HRMS) were recorded on Waters GCT Premier GC TOF or Agilent 6230 TOF LC/MS System.

## 2. Synthesis of di-2-pyridyldithiocarbonate (DPDTC)

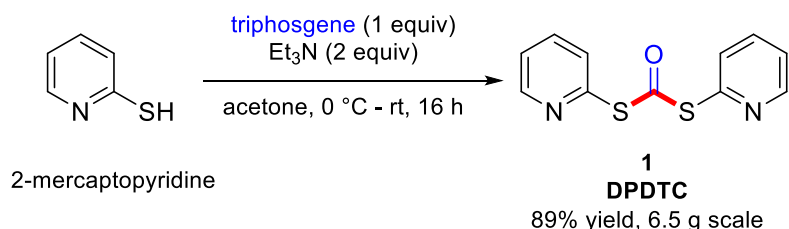

All glassware was flame dried. To a 500 ml round-bottom flask equipped with a PTFE-coated magnetic stir bar was added 2-mercaptopyridine (6 equiv, 60 mmol, 6.67 g), then the flask was sealed with a rubber septum and anhydrous acetone (100 ml) was added via syringe under a positive flow of argon, followed by anhydrous Et<sub>3</sub>N (6 equiv, 60 mmol, 8.36 mL) and the solution was stirred until all components were fully dissolved. An ice bath was used to cool the resulting solution, an argon balloon was affixed to the septum via a needle, then a solution of triphosgene (1 equiv, 10 mmol, 2.967 g) in acetone (12.5 mL) was slowly added over the course of 15 min. The ice was replaced as needed to keep the solution cool during addition of triphosgene to prevent excessive generation of phosgene gas. Upon full addition, triethylammonium chloride was observed to precipitate. The reaction was allowed to warm to rt and stir overnight. Upon completion, the septum was removed inside a fume hood and allowed to expel any excess phosgene

gas, then the reaction mixture was filtered to remove triethylammonium chloride, and the filtrate was concentrated in vacuo to afford a crude oil containing crystals of remaining triethylammonium chloride. The crude residue was redissolved in EtOAc in 10 ml portions and filtered into a separatory funnel. The combined organic extracts were washed with saturated aqueous NaHCO<sub>3</sub> (100 mL), followed by DI water (100 mL), followed by saturated brine (100 mL). The organic layer was separated and dried over anhydrous Na<sub>2</sub>SO<sub>4</sub>, filtered, and concentrated *in vacuo* and residual solvent was removed under high vacuum overnight to afford DPDTC as a light-yellow solid (6.596 g, 89% yield).

Caution: Triphosgene is acutely toxic and releases toxic phosgene gas on contact with moisture. It should be handled on small scale in a fume hood or glove box and weighed out using a pre-weighed, tightly sealed container.

Note: Commercial sources of inexpensive 2-mercaptopyridine may require purification prior to use due to the presence of the derived disulfide. This can be accomplished via recrystallization from EtOAc.

### 3. Optimization of the reaction conditions

#### 3.1. Optimization of S-(2-pyridyl) thioester formation

**General Procedure for thioester formation under neat conditions:** To a 1-dram vial, a PTFE-coated stir bar, carboxylic acid (1 equiv, 0.125 mmol, 36.8 mg) and DPDTC (1.05 equiv, 0.1275 mmol, 31.7 mg) were added. Upon completion, 1,3,5- trimethoxybenzene and CDCl<sub>3</sub> was added to the reaction vial and stirred for 15 minutes until fully homogeneous. The NMR was then directly taken. The contents were stirred at various temperatures and times. For all of the following optimization reactions, <sup>1</sup>H NMR yields were calculated using 1,3,5-trimethoxybenzene as the internal standard, integrating for the product at 7.88 ppm as described in section 3.3.

**Table S1.** Screening of equivalents of DPDTC

| entry | equivalents DPDTC | NMR yield (%) <sup>a</sup> |
|-------|-------------------|----------------------------|
| 1     | 1                 | 83                         |
| 2     | 1.05              | 88                         |
| 3     | 1.10              | 93                         |
| 4     | 1.25              | 98                         |
| 5     | 1.50              | 94                         |

<sup>a</sup> Yields were determined by <sup>1</sup>H NMR using 1,3,5-trimethylbenzene as an internal standard.

**Table S2.** Screening of temperature and time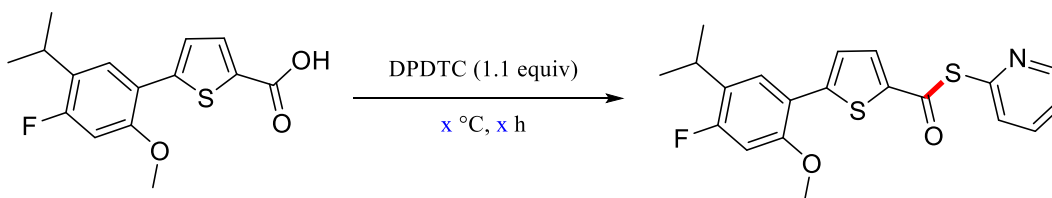

| entry | temperature (°C) | time (h) | NMR yield (%) <sup>a</sup> |
|-------|------------------|----------|----------------------------|
| 1     | 40               | 1        | 9                          |
| 2     | 40               | 2        | 37                         |
| 3     | 40               | 3        | 55                         |
| 4     | 40               | 4        | 72                         |
| 5     | 50               | 1        | 42                         |
| 6     | 50               | 2        | 71                         |
| 7     | 50               | 3        | 70                         |
| 8     | 50               | 4        | 84                         |
| 9     | 60               | 1        | 71                         |
| 10    | 60               | 2        | 88                         |
| 11    | 60               | 3        | 93                         |
| 12    | 60               | 4        | 98                         |

<sup>a</sup> Yields were determined by <sup>1</sup>H NMR using 1,3,5-trimethylbenzene as an internal standard.

**Figure S1.** Effect of time and temperature on thioester formation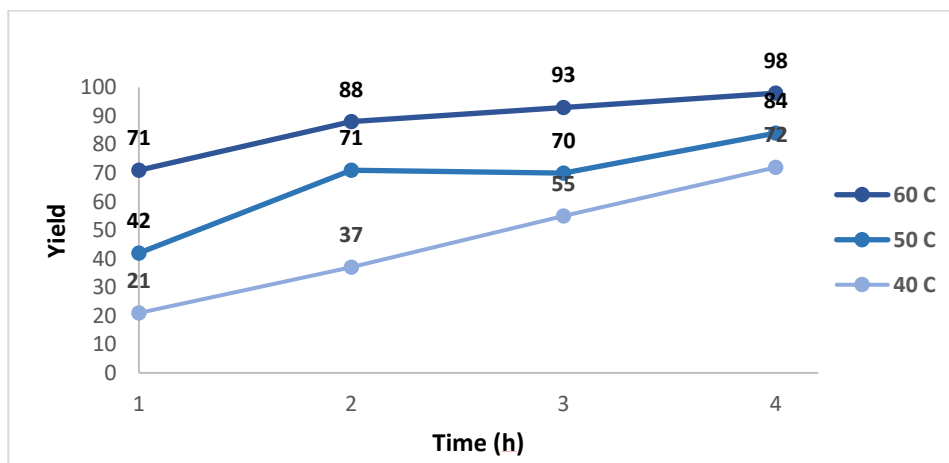

**Table S3.** Screening of additives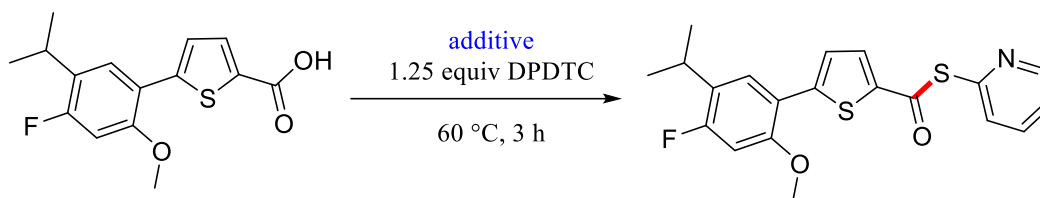

| entry    | additive           | NMR yield (%) <sup>a</sup> |
|----------|--------------------|----------------------------|
| <b>1</b> | <b>DMAP</b>        | <b>99</b>                  |
| 2        | NaHCO <sub>3</sub> | 92                         |
| 3        | DIPEA              | 70                         |
| 4        | TEA                | 65                         |

<sup>a</sup> Yields were determined by <sup>1</sup>H NMR using 1,3,5-trimethylbenzene as an internal standard.

### 3.2. Optimization of amide bond formation from S-(2-pyridyl) thioesters

**General Procedure for amide bond formation from S-(2-pyridyl) thioesters:** To a 1-dram vial, a PTFE-coated stir bar, pyridyl thioester (1 equiv, 0.10 mmol, 38.7 mg) and 3,4,5-trimethoxyaniline (1 equiv, 0.11 mmol, 20.2 mg) was added. Unless otherwise state 1.1 equiv of trimethoxyaniline was used. The contents were stirred at various temperatures, times, and in various solvents, or under aqueous conditions. Solvent or 2 wt % TPGS-750-M / H<sub>2</sub>O was subsequently added when noted. Upon completion 1,3,5-trimethoxybenzene and CDCl<sub>3</sub> was added to the reaction vial and stirred for 15 minutes until fully homogeneous. For aqueous systems, the reaction was extracted with EtOAc until no product remained in the aqueous layer. The combined organics were dried with anhydrous MgSO<sub>4</sub> and concentrated via rotary evaporator. For screening reactions with organic solvents, the reaction was concentrated via rotary evaporator. 1,3,5-Trimethoxybenzene and CDCl<sub>3</sub> were then added and stirred for 15 minutes until fully homogeneous. The NMR was then directly taken.

For all reactions, <sup>1</sup>H NMR yields were calculated using 1,3,5-trimethoxybenzene as the internal standard, integrating for the product at 7.65 ppm as described in section 3.3. To each of the resulting reaction mixtures 1,3,5-trimethoxybenzene was directly added. The yield was determined by <sup>1</sup>H NMR relative to the amount of internal standard added.

**Table 4.** Screening of solvent for amide bond formation under highly concentrated mixtures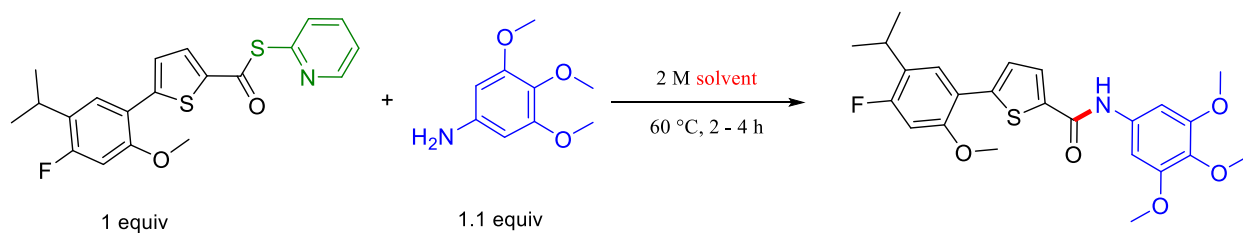

| entry    | solvent (2 M, 50 $\mu$ L) | NMR yield (%) <sup>b</sup><br>(2 h) | NMR yield (%) <sup>b</sup><br>(4 h) |
|----------|---------------------------|-------------------------------------|-------------------------------------|
| 1        | mineral oil               | 44                                  | 74                                  |
| 2        | mineral oil               | -                                   | 66                                  |
| <b>3</b> | <b>EtOAc</b>              | <b>84</b>                           | <b>97</b>                           |
| 4        | 2-Me-THF                  | 75                                  | 98                                  |
| 5        | acetone                   | 80                                  | 98                                  |
| 6        | isopropyl acetate         | 83                                  | 99                                  |
| 7        | EtOAc                     | 84                                  | -                                   |
| 8        | TEA                       | 86                                  | -                                   |
| 9        | TEA (5 equiv)             | 92                                  | -                                   |

<sup>a</sup> 100  $\mu$ L of mineral oil used. <sup>b</sup> Yields were determined by <sup>1</sup>H NMR using 1,3,5-trimethylbenzene as an internal standard.

**Table S5.** Screening of equivalents of amine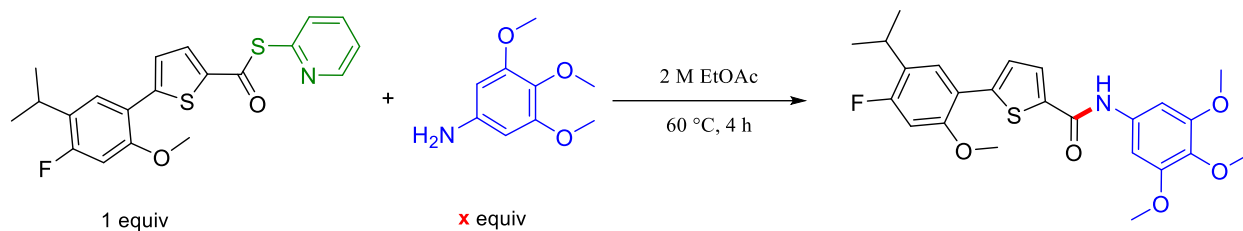

| entry    | amine (equiv) | NMR yield (%) <sup>a</sup> |
|----------|---------------|----------------------------|
| 1        | 1             | 92                         |
| <b>2</b> | <b>1.05</b>   | <b>94</b>                  |
| 3        | 1.1           | 90                         |
| 4        | 1.25          | 89                         |

<sup>a</sup> Yields were determined by <sup>1</sup>H NMR using 1,3,5-trimethylbenzene as an internal standard.

**Table S6.** Screening of temperature for amide bond formation under highly concentrated mixtures

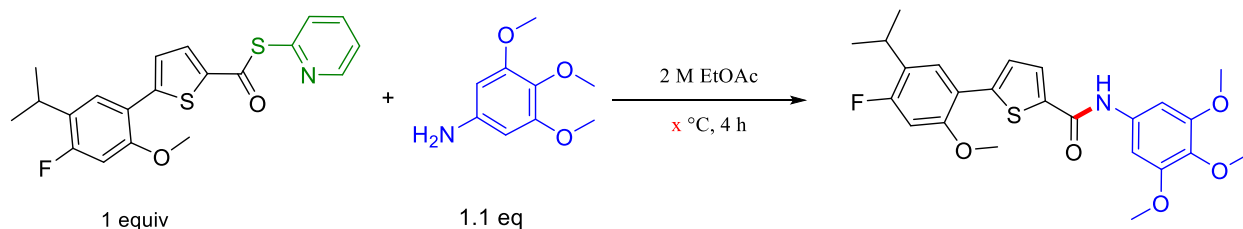

| entry    | temperature (°C) | NMR yield (%) <sup>a</sup> |
|----------|------------------|----------------------------|
| 1        | 40               | 84                         |
| 2        | 50               | 95                         |
| <b>3</b> | <b>60</b>        | <b>97</b>                  |

<sup>a</sup> Yields were determined by <sup>1</sup>H NMR using 1,3,5-trimethylbenzene as an internal standard.

**Table S7.** Screening of additive under neat conditions

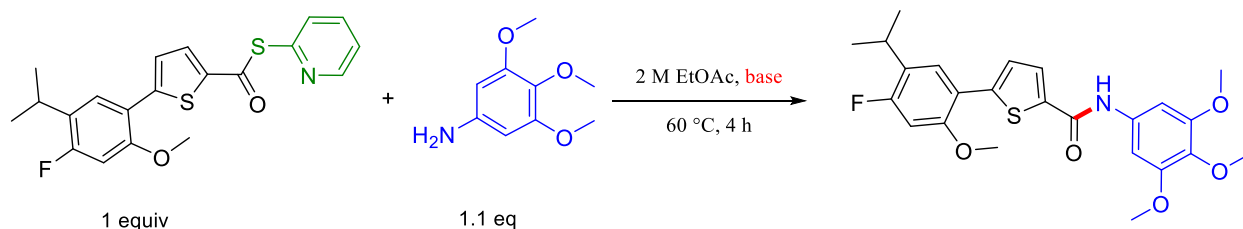

| entry    | base (5 equiv)      | NMR yield (%) <sup>a</sup> |
|----------|---------------------|----------------------------|
| 1        | NMM                 | 87                         |
| 2        | DIPEA               | 94                         |
| <b>3</b> | <b>TEA</b>          | <b>99</b>                  |
| 4        | <i>s</i> -collidine | 90                         |
| 5        | 2,6-lutidine        | 80                         |

<sup>a</sup> Yields were determined by <sup>1</sup>H NMR using 1,3,5-trimethylbenzene as an internal standard.

**Table S8.** Screening of temperature and time for reactions run in 2 wt % TPGS-750-M/H<sub>2</sub>O

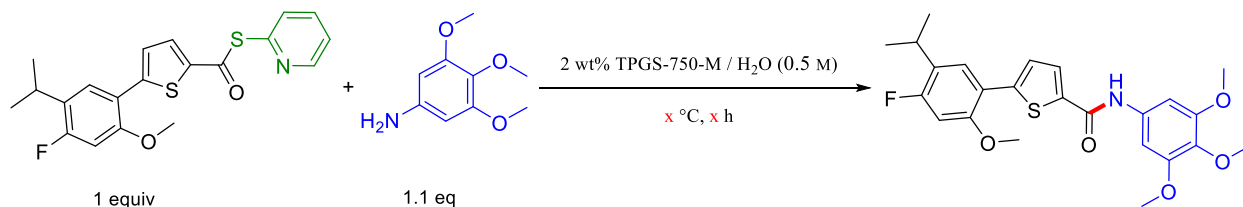

| entry | temperature | time (h) | NMR yield (%) <sup>a</sup> |
|-------|-------------|----------|----------------------------|
| 1     | rt          | 2        | 7                          |
| 2     | rt          | 16       | 3                          |

|           |              |           |               |
|-----------|--------------|-----------|---------------|
| 3         | 40 °C        | 2         | 7             |
| 4         | 40 °C        | 2         | 5             |
| 5         | 40 °C        | 6         | 12            |
| 6         | 40 °C        | 8         | 10            |
| 7         | 40 °C        | 16        | 95            |
| 8         | 50 °C        | 2         | 31            |
| 9         | 50 °C        | 16        | 90            |
| 10        | 60 °C        | 2         | 89            |
| 11        | 60 °C        | 6         | 95            |
| 12        | 60 °C        | 8         | 89            |
| <b>13</b> | <b>60 °C</b> | <b>16</b> | <b>&gt;95</b> |

<sup>a</sup> Yields were determined by <sup>1</sup>H NMR using 1,3,5-trimethylbenzene as an internal standard.

**Figure S2.** Effect of time and temperature of amide formation under aqueous micellar conditions

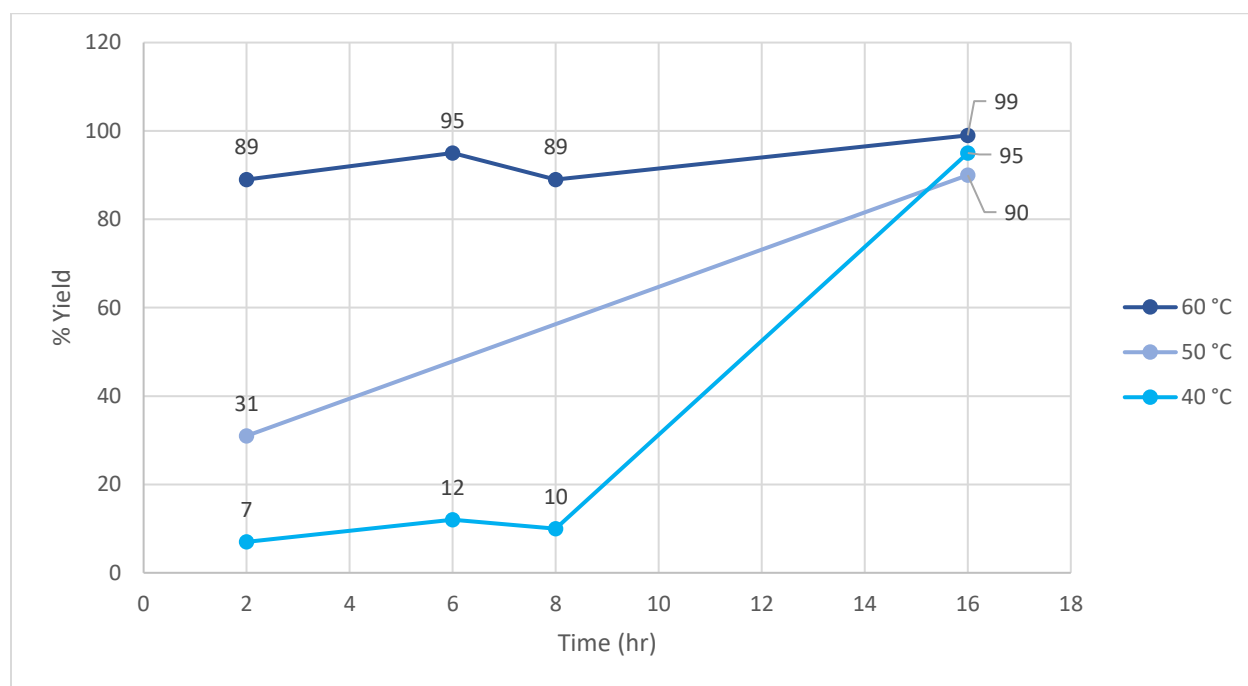

**Table S9.** Screening of surfactant

| entry    | co-solvent (10 vol %) | NMR yield (%) <sup>a</sup> |
|----------|-----------------------|----------------------------|
| <b>1</b> | <b>TPGS-750-M</b>     | <b>89</b>                  |
| 2        | MC-1                  | 52                         |
| 3        | Triton-X 100          | 70                         |

|   |                       |    |
|---|-----------------------|----|
| 4 | SDS                   | 54 |
| 5 | on water <sup>a</sup> | 61 |

<sup>a</sup> Reaction time was 4 h. <sup>b</sup> Yields were determined by <sup>1</sup>H NMR using 1,3,5-trimethylbenzene as an internal standard.

**Table S10.** Screening of co-solvent in 2 wt % TPGS-750-M/H<sub>2</sub>O

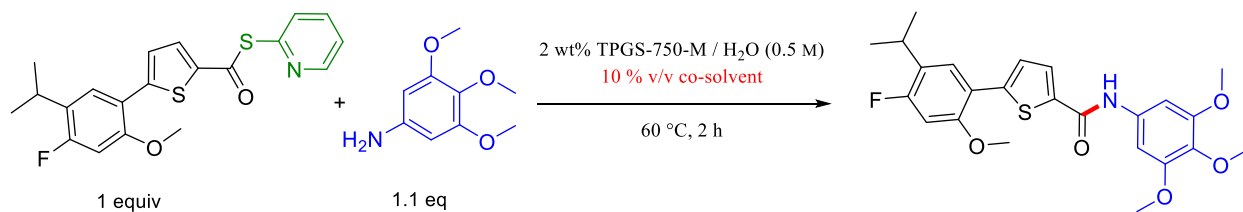

| entry | co-solvent (10 vol %) | NMR yield (%) <sup>a</sup> |
|-------|-----------------------|----------------------------|
| 1     | EtOAc                 | 98                         |
| 2     | acetone               | 70                         |
| 3     | 2-Me-THF              | 88                         |
| 4     | isopropyl acetate     | 91                         |

<sup>a</sup> Yields were determined by <sup>1</sup>H NMR using 1,3,5-trimethylbenzene as an internal standard.

### 3.3. NMR Yield Calculations

All NMR yields were calculated as follows using 1,3,5-trimethoxybenzene as the internal standard.

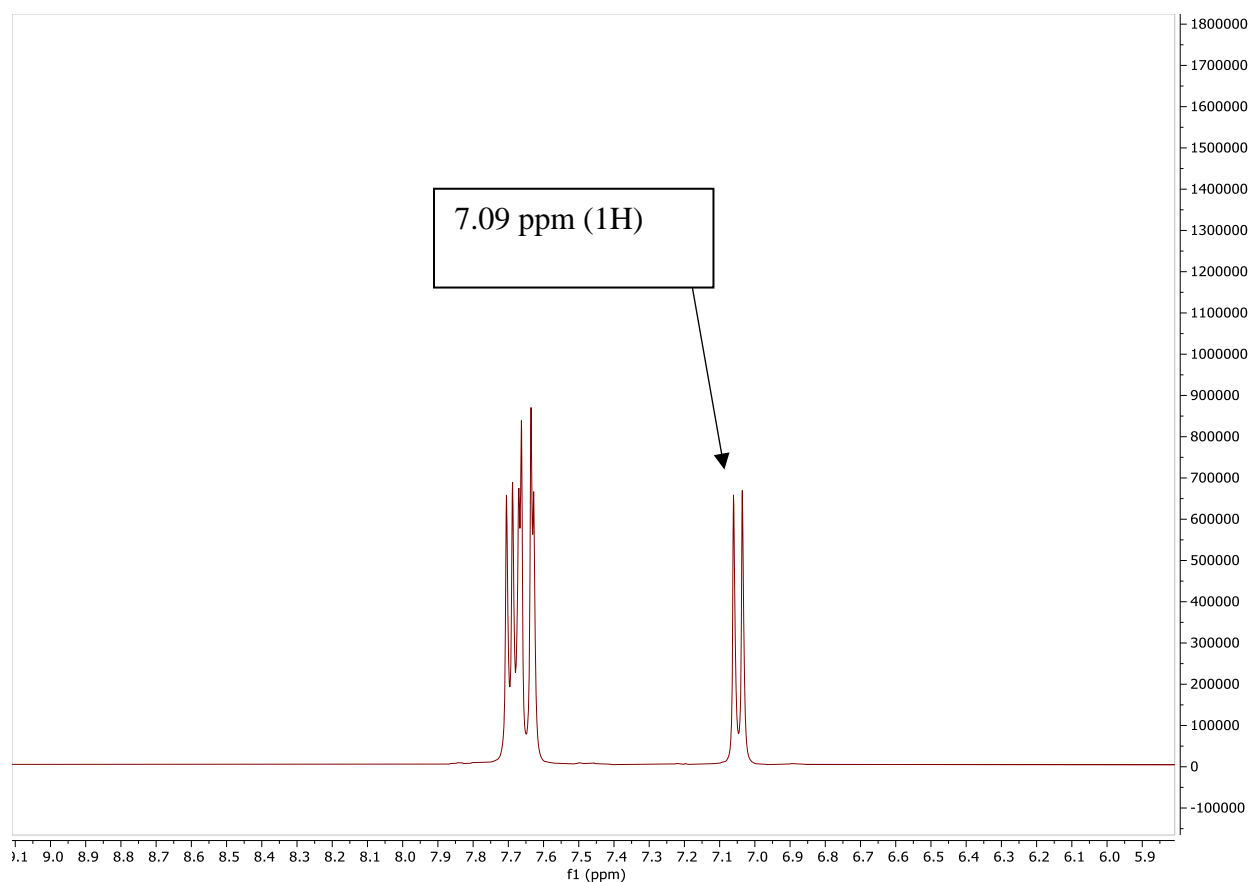

**Figure S1:**  $^1\text{H}$  NMR spectrum of 5-(4-fluoro-5-isopropyl-2-methoxyphenyl)thiophene-2-carboxylic acid in  $\text{DMSO-d}_6$ .

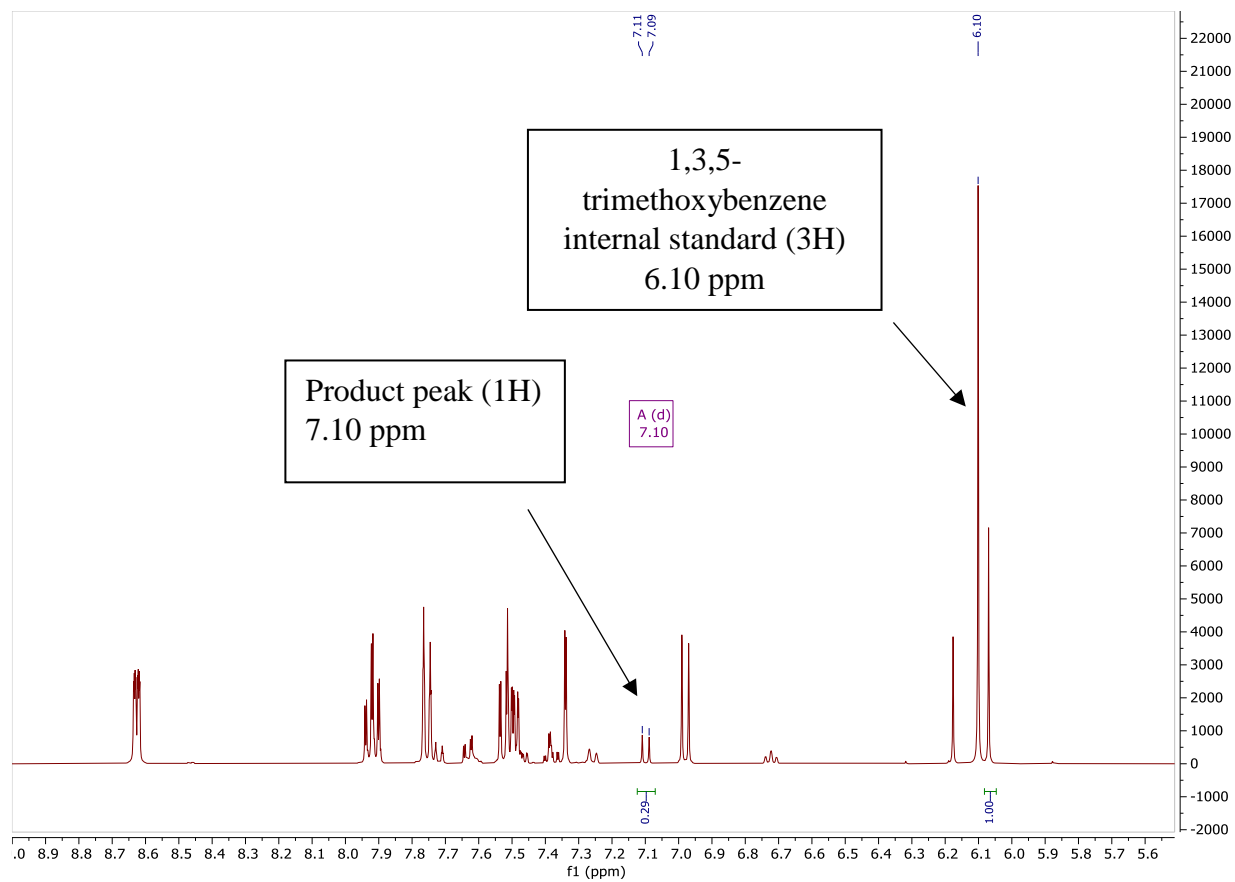

**Figure S3:** Example of  $^1\text{H}$  NMR yield of pyridyl thioester from carboxylic acid in  $\text{DMSO-d}_6$ .

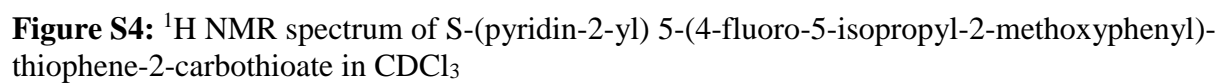

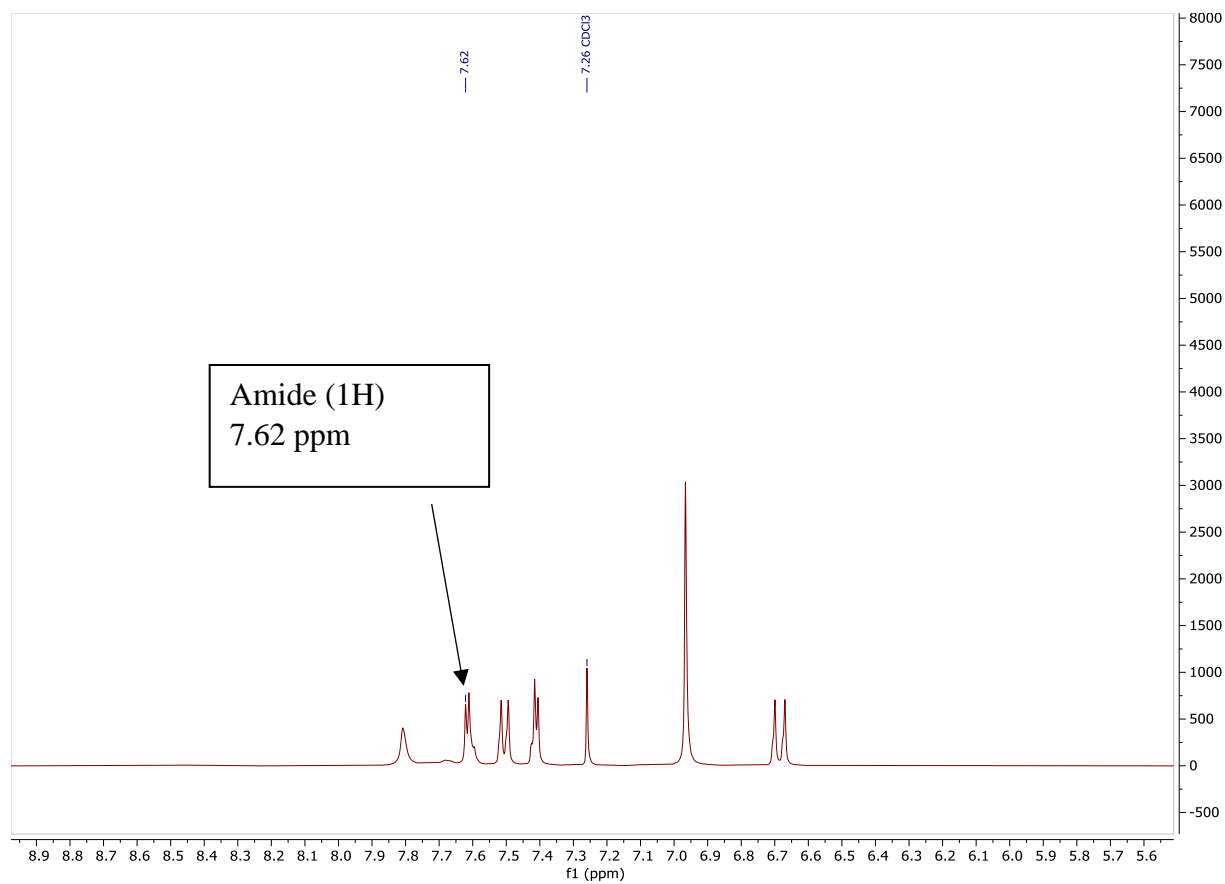

**Figure S5:**  $^1\text{H}$ NMR spectrum of 5-(4-fluoro-5-isopropyl-2-methoxyphenyl)-*N*-(3,4,5-trimethoxyphenyl)thiophene-2-carboxamide in  $\text{CDCl}_3$

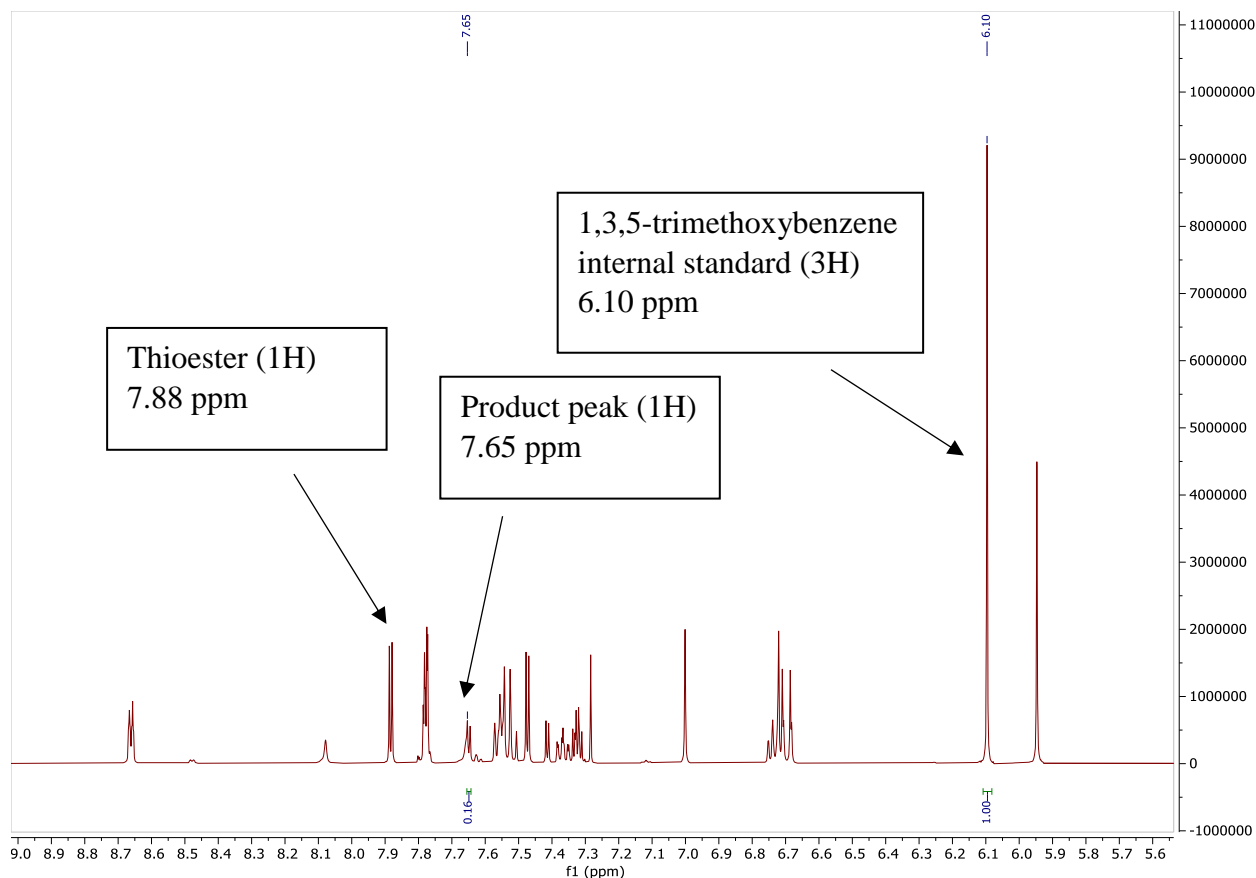

**Figure S6:** Example of  $^1\text{H}$  NMR yield of amide from 2-pyridylthioester in  $\text{CDCl}_3$

#### 4. One pot amide bond formation from carboxylic acid

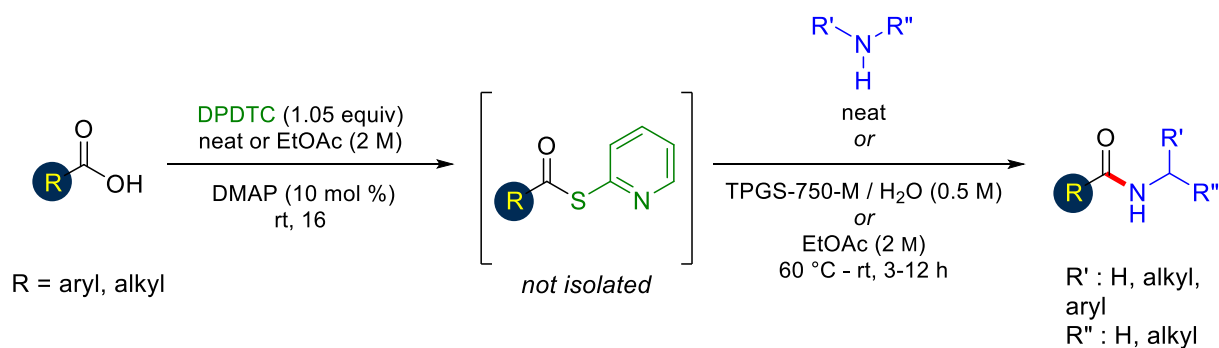

**General procedure of amide bond formation under neat conditions (Method A):** To a 1-dram vial, a PTFE-coated stir bar, carboxylic acid (1 equiv, 0.250 mmol) and DPDTC (1.05 equiv, 0.263 mmol, 65.2 mg) was added. The contented were stirred at 60 °C until full consumption of the acid, as determined by TLC (~4-6 h). Because the reaction is neat, it is important for the completion of the reaction for all contents to not be on the sides of the reaction vessel. In addition, the stirring

should not be too vigorous to cause splashing up the sides of the vial. Upon complete consumption of the thioester the amine was directly added, in 1-pot to the vial and stirred until complete consumption of the thioester. The crude reaction mixture was dissolved in EtOAc and washed with 1 M NaOH (1 mL x 3) and concentrated via rotary evaporation.

#### **General procedure of amide bond formation by using EtOAc (2 M) (Method B):**

Upon complete consumption of the thioester, amine (1.05 equiv, 0.263 mmol), followed by EtOAc (2 M, 125  $\mu$ L) was directly added, and stirred at 60 °C until complete consumption of the thioester. The crude reaction mixture was dissolved in EtOAc and washed with 1 M NaOH (1 mL x 3), then 1 M HCl (1 mL x 3), the EtOAc was then concentrated via rotary evaporation.

#### **General procedure for amide bond formation by using aqueous conditions (Method C):**

Upon complete consumption of the thioester, amine (1.05 equiv, 0.263 mmol), EtOAc (10 vol %, 50  $\mu$ L), and 2 wt % TPGS-750-M/H<sub>2</sub>O (0.5 M, 0.5 mL), respectively, was directly added, and stirred at 60 °C until complete consumption of the thioester. The crude reaction mixture was washed with 1 M NaOH (1 mL x 3) and dried over anhydrous MgSO<sub>4</sub>.

## **5. General Purification Procedures for amides**

### **5.1. General Purification Method for General Procedure A**

#### **Method A-1**

The crude reaction mixture was dissolved in EtOAc and washed with 1 M NaOH (1 mL x 3) and concentrated via rotary evaporation.

#### **Method A-2**

The crude reaction mixture was dissolved in EtOAc and washed with 1 M NaOH (1 mL x 3), then 1 M HCl (1 mL x 3), and dried over anhydrous MgSO<sub>4</sub>. The combined EtOAc layers were then concentrated via rotary evaporation.

#### **Method A-3**

The crude reaction mixture was washed with 1 M NaOH (1 mL x 3) and dried over anhydrous MgSO<sub>4</sub> and concentrated via rotary evaporation to afford the crude product.

### **5.2. General Purification Method for General Procedure B**

The crude reaction mixture was extracted with EtOAc until no product could be observed in the EtOAc, as determined by TLC. The extracts were then concentrated and purified via silica gel chromatography. The eluent varied per substrate.

### **5.3. General Purification Method for General Procedure C**

The crude reaction mixture was extracted with EtOAc until no product remained as determined by TLC. The extracted layers were combined and then washed with 1 M NaOH (3 times) followed by

1 M HCl (3 times). The crude material was then obtained via rotary evaporation followed by purification via silica gel chromatography. The eluent varied per substrate.

## 6. Synthesis of starting materials

### Synthesis of 5-(4-fluoro-5-isopropyl-2-methoxyphenyl)thiophene-2-carboxylic acid

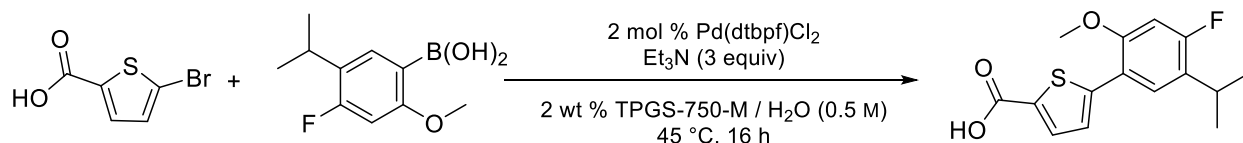

To an oven dried round bottom flask with a PTFE coated stir bar were added 5-bromo-2-furoic acid (1 equiv, 7.4 mmol, 1.55 g), (4-fluoro-5-isopropyl-2-methoxyphenyl)boronic acid (1.2 equiv, 8.88 mmol, 1.905 g), and Pd(dtbpf)Cl<sub>2</sub> (1 mole %, 97.6 mg). The round bottom flask was then capped with a rubber septum and purged with argon. Triethylamine (3 equiv, 22.2 mmol, 2.27 mL) and 2 wt % TPGS-750-M/H<sub>2</sub>O (0.5 M, 12.7 mL) was then added via syringe and stirred vigorously overnight (16 h) at 45 °C (internal temperature). The reaction was then quenched by the addition of concentrated HCl. The precipitate was filtered and redissolved in EtOAc and then washed with 50% sodium bicarbonate/water solution. The EtOAc layer was either reconcentrated *in vacuo* or precipitated with concentrated HCl. The resulting compound was an off-white/light brown solid (1.85 g, 85% yield). R<sub>f</sub> = 0.50 (1:1 EtOAc/hexanes).

### Synthesis of 8-bromo-5-methyl-6-oxo-5,6-dihydro-4H-benzo[f]imidazo[1,5-a][1,4]diazepine-3-carboxylic acid

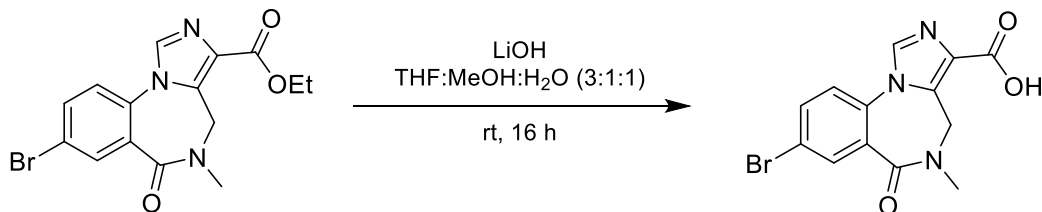

To an oven dried round bottom flask with a PTFE coated stir bar were added ethyl 8-bromo-5-methyl-6-oxo-5,6-dihydro-4H-benzo[f]imidazo[1,5-a][1,4]diazepine-3-carboxylate (300 mg, 0.83 mmol), THF (6 mL), MeOH (2 mL) and a solution of lithium hydroxide (59.3 mg, 0.24 mmol) in water (2 mL) was added. The mixture was stirred at rt for 16 h. The volatiles were removed *in vacuo* and the residue treated with 10% aqueous citric acid solution. The resultant precipitate was filtered and dried under suction to give the title compound 8-bromo-5-methyl-6-oxo-5,6-dihydro-4H-benzo[f]imidazo[1,5-a][1,4]diazepine-3-carboxylic acid as a white solid (251 mg, 90% yield).

## Synthesis of 3-(3-(tert-butylthio)-1-(4-chlorobenzyl)-5-(quinolin-2-ylmethoxy)-1H-indol-2-yl)-2,2-dimethylpropanoic acid

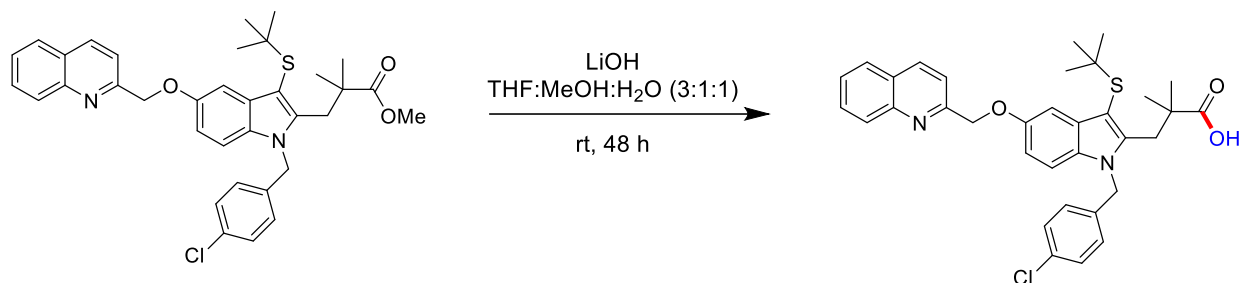

To an oven dried round bottom flask with a PTFE coated stir bar were added methyl 3-(3-(*t*-butylthio)-1-(4-chlorobenzyl)-5-(quinolin-2-ylmethoxy)-1H-indol-2-yl)-2,2-dimethylpropanoate (200 mg, 0.33 mmol), THF (6 mL), MeOH (2 mL), and a solution of lithium hydroxide (23.76 mg, 0.1 mmol) in water (2 mL) added. The mixture was stirred at rt for 48 h. The volatiles were removed *in vacuo* and the residue treated with 10% aqueous citric acid solution. The resultant precipitate was filtered and dried under suction to give the title compound 8-bromo-5-methyl-6-oxo-5,6-dihydro-4H-benzo[f]imidazo[1,5-a][1,4]diazepine-3-carboxylic acid as a yellow solid (140 mg, 72% yield).

## 7. PMI and E Factor Calculations

### 1. PMI for neat reaction (primary amide formation) on 0.25 mmol scale

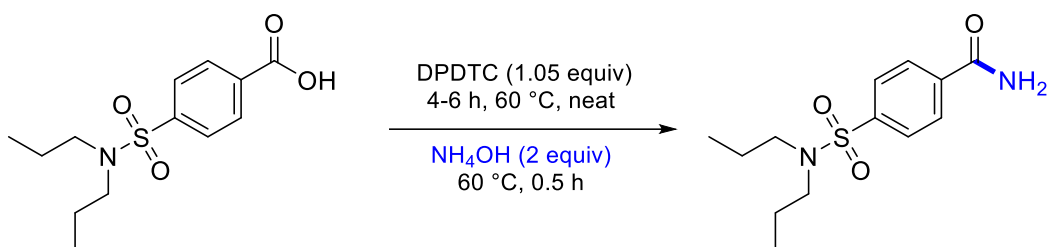

$$E \text{ Factor} = \frac{\text{mass waste organics}}{\text{mass product}} = \frac{(\text{mass}_{\text{DPDTC}} + \text{mass}_{\text{excess amine}})}{(\text{mass}_{\text{product}})} (\text{mass}_{\text{product}}) = \frac{0.0652 \text{ g} + 0.00426 \text{ g}}{0.0710} = 0.94$$

$$PMI = \frac{\text{mass waste organics}}{\text{mass product}} = \frac{(\text{mass}_{\text{DPDTC}} + \text{mass}_{\text{excess amine}} + \text{mass}_{\text{aq}})}{(\text{mass}_{\text{product}})} (\text{mass}_{\text{product}}) = \frac{0.0652 \text{ g} + 0.00426 \text{ g} + 1.02 \text{ g}}{0.0710} = 15.3$$

## 2. PMI for neat reaction forming a secondary amide on a 0.25 mmol scale

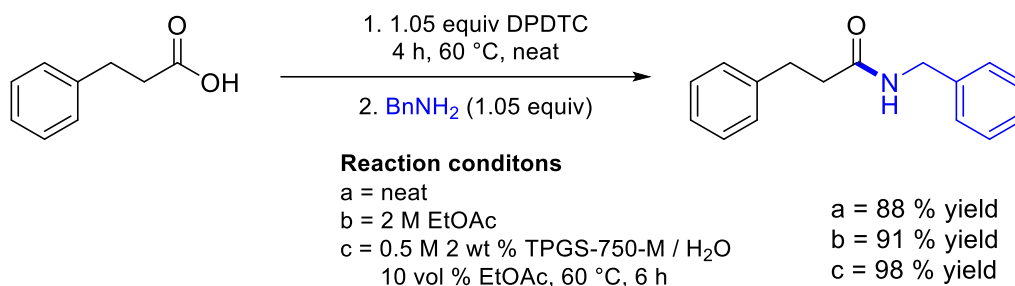

### PMI and E Factor for a neat reaction (conditions a)

$$E \text{ Factor} = \frac{\text{mass waste organics}}{\text{mass product}} = \frac{(\text{mass}_{\text{DPDTC}} + \text{mass}_{\text{excess amine}} + \text{mass}_{\text{EtOAc}})}{(\text{mass}_{\text{product}})} (\text{mass}_{\text{product}}) = \frac{0.0652 \text{ g} + 0.00138 \text{ g} + 0.451 \text{ g}}{0.0527} = 9.77$$

$$PMI = \frac{\text{mass waste organics}}{\text{mass product}} = \frac{(\text{mass}_{\text{DPDTC}} + \text{mass}_{\text{excess amine}} + \text{mass}_{\text{aq}})}{(\text{mass}_{\text{product}})} (\text{mass}_{\text{product}}) = \frac{0.0652 \text{ g} + 0.00138 \text{ g} + 0.451 \text{ g} + 1.02 \text{ g}}{0.0527} = 29.1$$

### PMI and E Factor for a reaction using 2 M EtOAc (conditions b)

$$E \text{ Factor} = \frac{\text{mass waste organics}}{\text{mass product}} = \frac{(\text{mass}_{\text{DPDTC}} + \text{mass}_{\text{excess amine}} + \text{mass}_{\text{EtOAc}})}{(\text{mass}_{\text{product}})} (\text{mass}_{\text{product}}) = \frac{0.0652 \text{ g} + 0.00138 \text{ g} + 0.634 \text{ g}}{0.0542} = 12.9$$

$$PMI = \frac{\text{mass waste organics}}{\text{mass product}} = \frac{(\text{mass}_{\text{DPDTC}} + \text{mass}_{\text{excess amine}} + \text{mass}_{\text{aq}})}{(\text{mass}_{\text{product}})} (\text{mass}_{\text{product}}) = \frac{0.0652 \text{ g} + 0.00138 \text{ g} + 0.634 \text{ g} + 1.02 \text{ g}}{0.0542} = 31.7$$

### PMI and E Factor for 0.5 M 2 wt % TPGS-750-M/H<sub>2</sub>O, 10 vol % EtOAc reaction on 1 mmol scale (conditions c)

$$E \text{ Factor} = \frac{\text{mass waste organics}}{\text{mass product}} = \frac{(\text{mass}_{\text{DPDTC}} + \text{mass}_{\text{excess amine}} + \text{mass}_{\text{EtOAc}})}{(\text{mass}_{\text{product}})} (\text{mass}_{\text{product}}) = \frac{0.012416 \text{ g} + 0.0053575 \text{ g} + 2.233 \text{ g}}{0.234} = 23.2$$

$$PMI = \frac{\text{mass waste organics}}{\text{mass product}} = \frac{(\text{mass}_{\text{DPDTC}} + \text{mass}_{\text{excess amine}} + \text{mass}_{\text{aq}})}{(\text{mass}_{\text{product}})} (\text{mass}_{\text{product}}) = \frac{0.0652 \text{ g} + 0.00138 \text{ g} + 0.634 \text{ g} + 5.06 \text{ g}}{0.234} = 31.3$$

**Table 10: Comparison PMI**

| entry | reagent          | reaction | work-up | overall PMI |
|-------|------------------|----------|---------|-------------|
| 1     | T3P              | 12       | 31      | 43          |
| 2     | CDI              | 16       | 36      | 52          |
| 3     | HATU             | 11       | 23      | 34          |
| 4     | EDC              | 15       | 31      | 46          |
| 5     | oxalyl chloride  | 12       | 48      | 60          |
| 6     | DPDTC            | 1.2      | 27.9    | 29.1        |
| 7     | DPDTC (1° amide) | 0.94     | 14.4    | 15.3        |

## 8. Large Scale Reaction

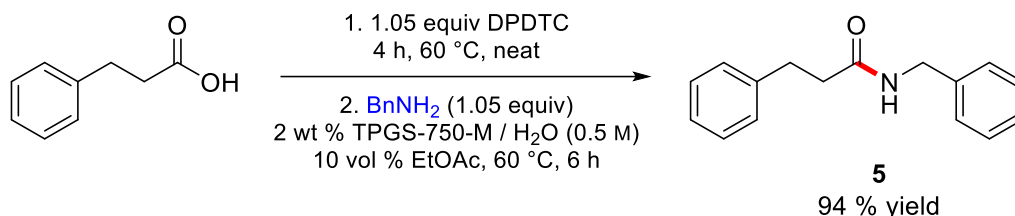

A 100 mL round-bottom flask containing a PTFE-coated magnetic stir bar was charged with phenylpropionic acid (1.501 g, 10 mmol) and DPDTC (2.607 g, 10.5 mmol) and stirred at 60 °C for 4 h. Benzylamine (1.147 mL, 10.5 mmol) was then added, followed by EtOAc (10 vol %, 2 mL) and 2 wt % TPGS-750-M (0.5 M, 18 mL) and stirred for 6 h at 60 °C (internal temperature, block set to 65 °C). The resulting contents of the reaction were extracted with EtOAc (3 x 3.0 mL). The crude product was purified via General Purification Method A-2 to provide the desired compound **5** as a white solid (2.25 g, 94 %).  $R_f = 0.41$  (1:1 EtOAc/hexanes).

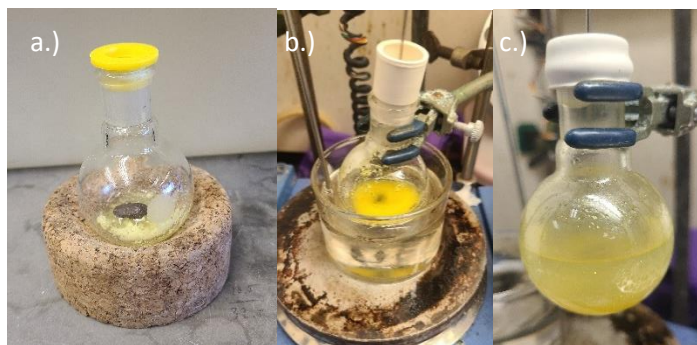

a.) Initial reaction, b.) after thioester formation, c.) after addition of benzyl amine and TPGS-750-M/H<sub>2</sub>O

## 9. Recycle Study

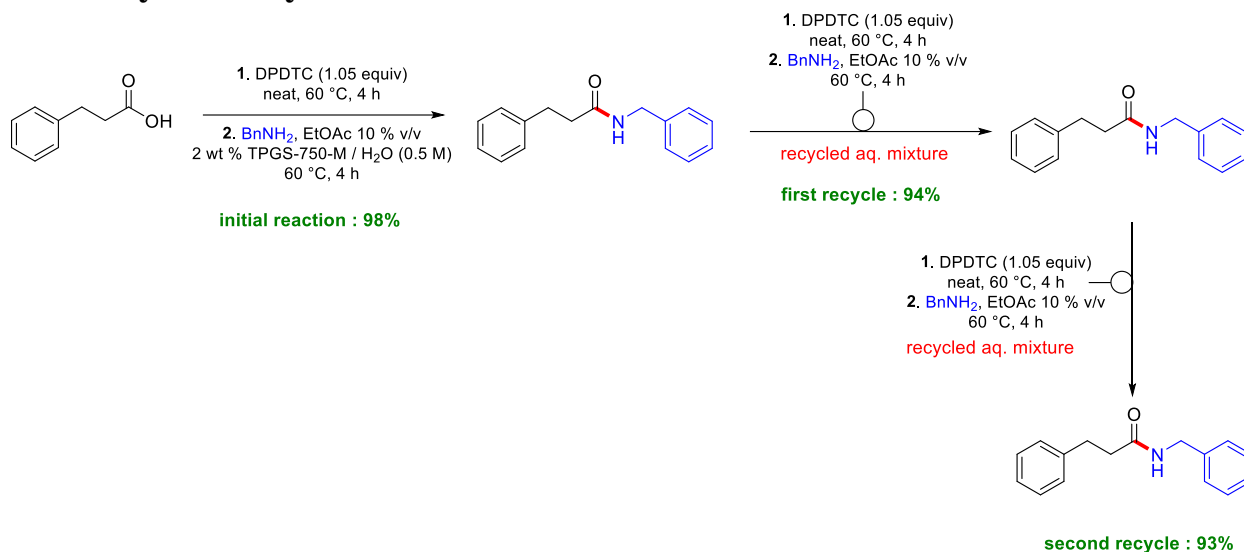

To a 2-dram vial equipped with a Teflon coated stir bar was added phenylpropionic acid (150.2 mg, 1 mmol) and DPDTC (260.7 mg, 1.05 mmol) and stirred at 60 °C for 3 h. Benzylamine (115 µL, 1.05 mmol) was then added, followed by EtOAc (10 vol %, 200 µL) and 2 wt % TPGS-750-M (0.5 M, 1.8 mL) and stirred for 4 h at 60 °C (internal temperature, block set to 65 °C). The resulting contents of the reaction were extracted with EtOAc (3 x 3.0 mL). The combined organic layer was washed with 1 M NaOH (3 x 2 mL) and 1 M HCl (3 x 2 mL). The resulting organic layer was washed with brine (1 x 2 mL) and dried over anhydrous MgSO<sub>4</sub> and concentrated *in vacuo* to afford a white solid (234 mg, 98% yield). The recovered 2 wt % TPGS-750-M was used in the followed reaction.

### 1<sup>st</sup> Recycle

To a 2-dram vial equipped with a Teflon coated stir bar was added phenylpropionic acid (150.2 mg, 1 mmol) and DPDTC (260.7 mg, 1.05 mmol) and stirred at 60 °C for 3 h. Benzylamine (115 µL, 1.05 mmol) was then added, followed by EtOAc (10 vol %, 200 µL) and the recycled 2 wt % TPGS-750-M (0.5 M, 1.8 mL) from the previous reaction and the resulting mixture was stirred for 4 h at 60 °C (internal temperature, block set to 65 °C). The resulting mixture was purified using the same conditions as stated above, resulting in a white solid (225 mg, 94% yield). The recovered 2 wt % TPGS-750-M/H<sub>2</sub>O was used in the followed reaction.

### 2<sup>nd</sup> Recycle

To a 2-dram vial equipped with a Teflon coated stir bar was added phenylpropionic acid (150.2 mg, 1 mmol) and DPDTC (260.7 mg, 1.05 mmol) and stirred at 60 °C for 3 h. Benzylamine (115 µL, 1.05 mmol) was then added, followed by EtOAc (10 vol %, 200 µL) and the recycled 2 wt % TPGS-750-M/H<sub>2</sub>O (0.5 M, 1.8 mL) from the previous reaction and the mixture was then stirred for 4 h at 60 °C (internal temperature, block set to 65 °C). The resulting mixture was purified using the same conditions as stated above, resulting in a white solid (222 mg, 93% yield).

At this point 0.3 mL of the 2 wt % TPGS-750-M/H<sub>2</sub>O solution remained and was lost due to small scale extraction and no further recycling of the aqueous medium was pursued.

## 10. Multi-step, 1-pot: chemocatalysis sequence procedures

**Scheme 1:** 3-Step, 1-pot sequence to afford a nitrile as a drug derivative

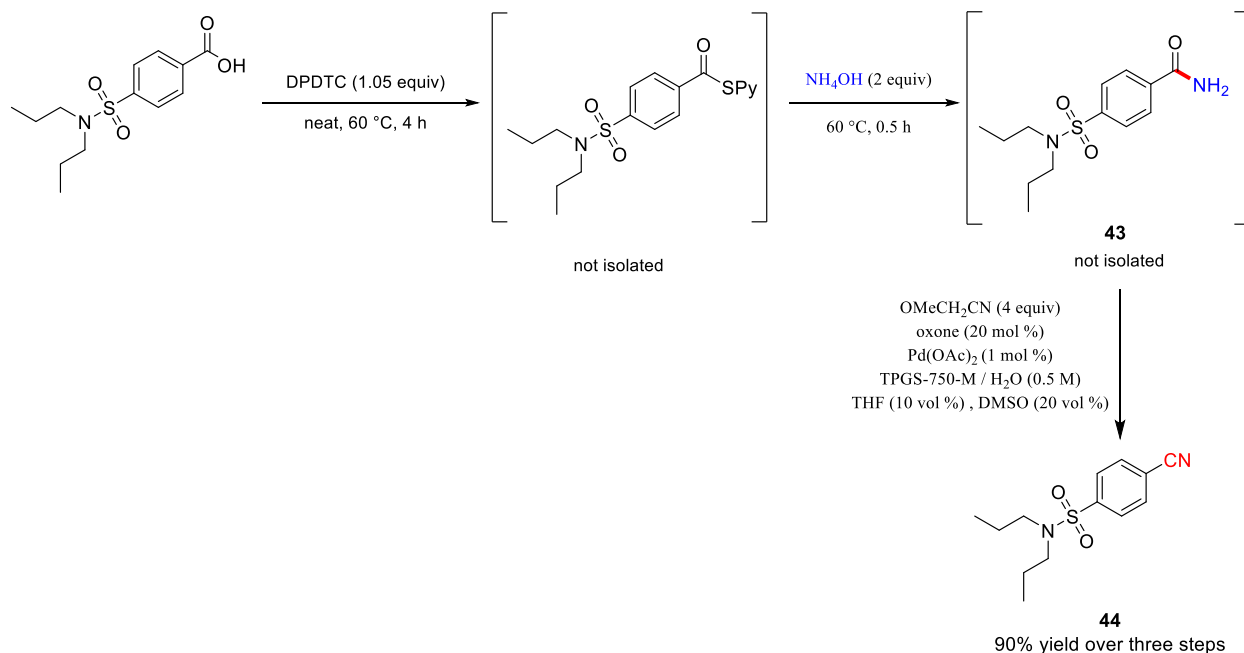

To a 1-dram vial equipped with a PTFE coated stir bar was added was added probenecid (1 equiv, 0.25 mmol, 71.4 mg), DPDTC (1.1 equiv, 0.26 mmol, 65.2 mg) and stirred for 4.5 h at 60 °C internal temperature. The reaction was carried forward without isolation or workup. To the vial, NH<sub>4</sub>OH (2 equiv, 0.50 mmol, 63 µL) was then added and stirred for 0.5 h at 60 °C internal temperature. To the reaction mixture was added 1 M NaOH (1 mL x 3) after which the NaOH layer was removed, which removed the by-product 2-mercaptopyridine. The reaction mixture was then washed with water (1 mL x 2). To the vial containing the primary amide **43**, Oxone (20 mole %, 15.4 mg) was added followed by the addition of DMSO (20 vol %, 100 µL). The mixture was then heated with a heat gun until the primary amide dissolved. A 2 wt % TPGS-750-M/H<sub>2</sub>O solution (0.5 M, 0.45 mL) was added, followed by methoxyacetonitrile (4 equiv, 1 mmol, 74.4 µL), and from a stock solution of Pd(OAc)<sub>2</sub> in THF, 50 µL was then introduced. The stock solution contained 5.6 mg of Pd(OAc)<sub>2</sub> in 500 µL of THF. This procedure was followed according to the previously described by Wood, *et al.*<sup>1</sup> The reaction mixture was stirred overnight until complete as determined by TLC. The entire reaction mixture was poured onto a silica plug and eluted with 20 % EtOAc/80% hexanes resulting in a compound **44** white solid (59.9 mg, 90% yield). *R<sub>f</sub>* = 0.38 (20% EtOAc/80% hexanes).

**Scheme 2:** 3-Step, 1-pot sequence to afford the nitrile of a drug derivative

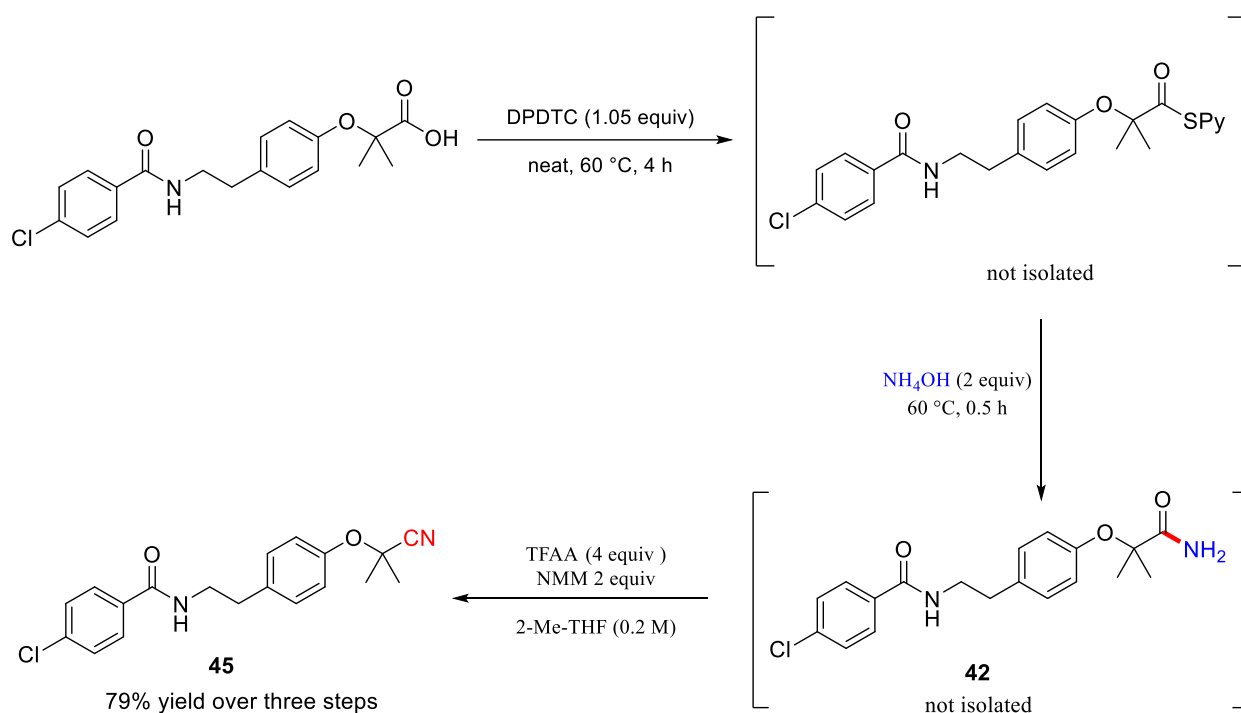

**Procedure:** To a 1-dram vial equipped with a PTFE coated stir bar was added bezafibrate (1 equiv, 0.250 mmol, 90.5 mg) and DPDTC (1 equiv, 0.25 mmol, 65.2 mg) and the mixture was stirred for 3 h at 60 °C internal temperature. The reaction mixture was carried forward without isolation or workup. To the vial,  $\text{NH}_4\text{OH}$  (2 equiv, 0.50 mmol, 63  $\mu\text{L}$ ) was added and stirred for 1 h at 60 °C internal temperature. To the reaction mixture was added 1 M NaOH (1 mL x 2) after which the NaOH layer was removed after centrifugation. Then, 1 M HCl (1 mL x 2) was added, followed by deionized water (1 mL x 2). Toluene (1 mL x 2) was added and sequentially evaporated under vacuum to remove any remaining water, as the following amide dehydration is sensitive to the presence of water. To the same vial with the primary amide **42**, NMM (2 equiv, 0.5 mmol, 100  $\mu\text{L}$ ) was directly added followed by the addition of 2-MeTHF (0.2 M, 1.25 mL) and trifluoroacetic anhydride (4 equiv, 1 mmol, 140  $\mu\text{L}$ ). The reaction was stirred for 10 min on ice followed by stirring for 2 h at rt. The reaction mixture was then quenched with brine and extracted with EtOAc. The combined organics were washed with 1:1 1 M HCl/brine and 1:1 sat  $\text{NaHCO}_3$ /brine, followed by a brine wash. The organics were then dried over anhydrous  $\text{MgSO}_4$  and concentrated *in vacuo*, resulting in a product **45** white solid (71 mg, 79 % yield).  $R_f$  = 0.44 (20% EtOAc/80% hexanes).

**Scheme 3:** A 4-step, 1-pot sequence utilizing a Merck Informer Library acid to form ester **7**

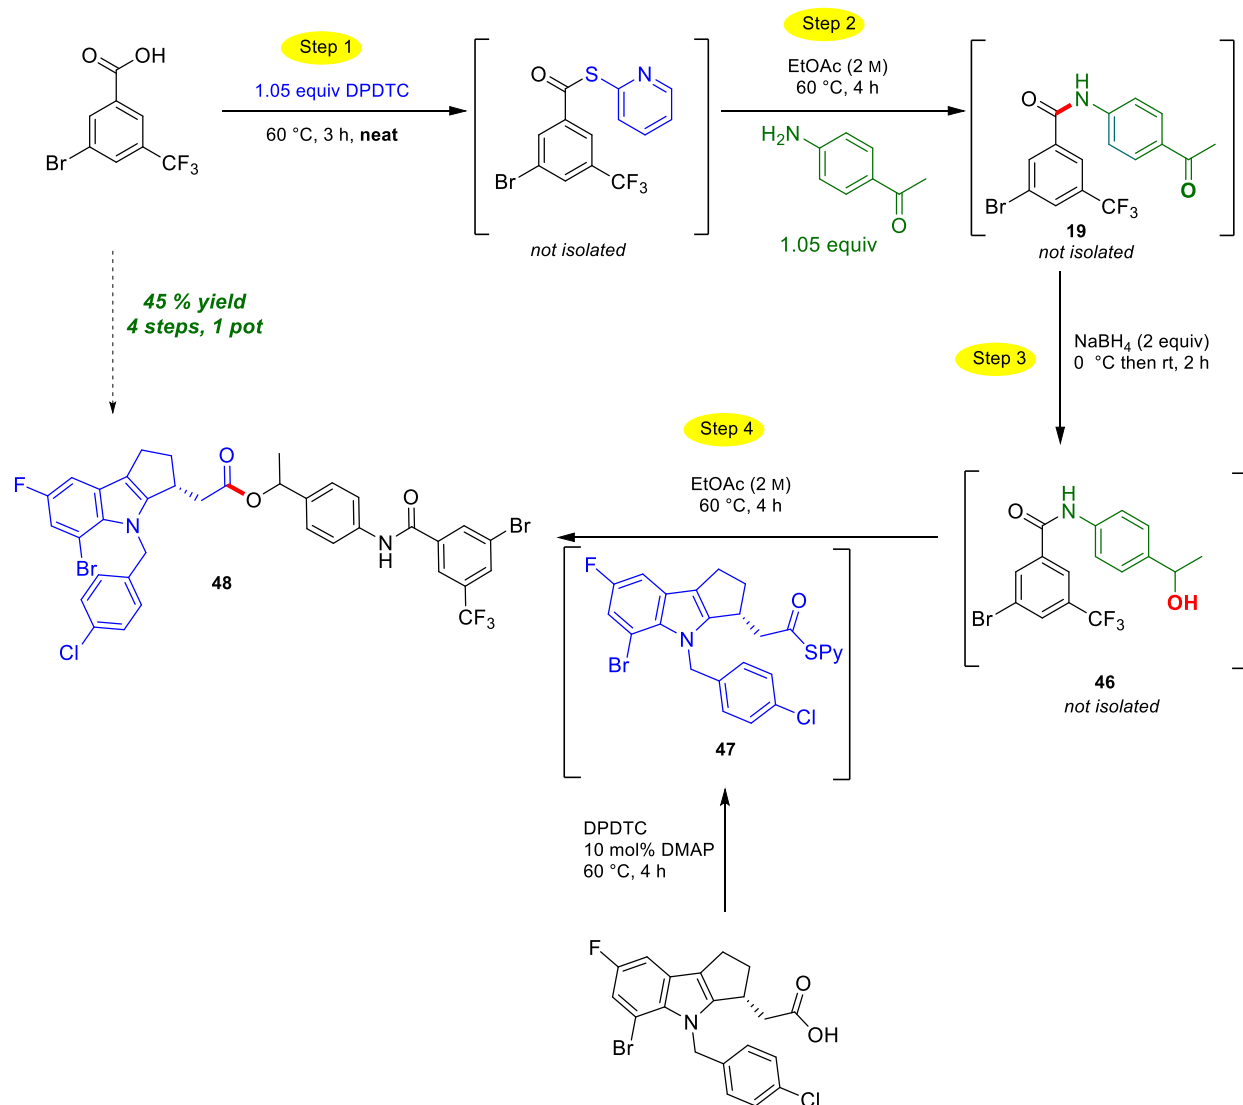

To a 2-dram vial equipped with a PTFE coated stir bar was added 3-bromo-5-(trifluoromethyl) benzoic acid (1 equiv, 0.250 mmol, 67.3 mg) and DPDTC (1.05 equiv, 0.263 mmol, 65.3 mg) and the mixture was then stirred for 4 h at 60 °C internal temperature. The reaction was carried forward without isolation or workup. To the vial, 4-aminoacetophenone (1.05 equiv, 0.263 mmol, 35.5 mg) and EtOAc (2 M, 125  $\mu$ L) was added and stirred for 3 h at 60 °C internal temperature. The reaction mixture was washed with 1 M NaOH (3 x 1 mL), and then 1 M HCl (3 x 1 mL). To the same vial, NaBH<sub>4</sub> (2 equiv, 0.5 mmol, 18.9 mg) was added and the mixture was stirred on ice for 10 min and then at rt for 2 h. This mixture was then azeotropically dried with toluene. To the same vial, compound **47** (1 equiv, 0.25 mmol, 132 mg), DMAP (0.10 equiv, 0.025 mmol, 3.1 mg) and dry EtOAc (0.5 M, 125  $\mu$ L), were added and stirred for 12 h at 60 °C. The EtOAc was dried over anhydrous K<sub>2</sub>CO<sub>3</sub> and anhydrous MgSO<sub>4</sub> and stored on sieves before use. The reaction was applied directly onto SiO<sub>2</sub> and then purified via column chromatography using a gradient of 10% EtOAc/Hexane) resulting in a product **48** white solid (90 mg, 45% yield). *R<sub>f</sub>* = 0.40 (20% EtOAc/80% hexanes).

## 11. Analytical data

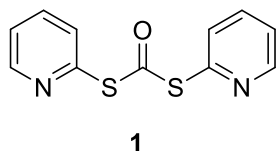

### **S,S-Di(pyridin-2-yl) carbonodithioate (1):**

**<sup>1</sup>H NMR (400 MHz, CDCl<sub>3</sub>):** δ 8.58 (ddd, *J* = 4.8, 2.0, 1.0 Hz, 2H), 7.73 – 7.60 (m, 4H), 7.26 (ddd, *J* = 7.3, 4.8, 1.5 Hz, 2H).

**<sup>13</sup>C NMR (101 MHz, CDCl<sub>3</sub>):** δ 185.60, 150.60, 150.58, 137.46, 130.43, 124.12, 77.48, 77.16, 76.85.

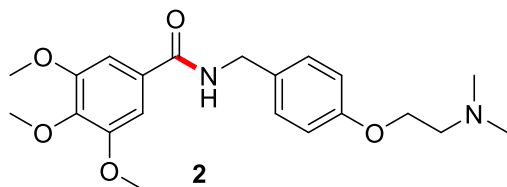

***N*-[*p*-[(2-Dimethylamino)ethoxy]benzyl]-3,4,5-trimethoxybenzamide (2):** Compound (**2**) was prepared according to Method C with the following modifications. In step 1: 1.5 equiv of DPDTC and 0.5 M TPGS-750-M/H<sub>2</sub>O for 16 h at 45 °C. In step 2: 1.1 equiv of amine was added at rt for 16 h. The crude product was purified by flash column chromatography (10% EtOAc/hexanes) afforded **1** (88.4 mg, 91% yield) as a white solid; **R<sub>f</sub>**: 0.57 (30% EtOAc/hexanes). **R<sub>f</sub>**: 0.36 (30% MeOH/70% DCM).

**<sup>1</sup>H NMR (400 MHz, CDCl<sub>3</sub>):** δ 7.30 – 7.26 (m, 2H), 7.00 (s, 2H), 6.94 – 6.86 (m, 2H), 6.28 (s, 1H), 4.57 (d, *J* = 5.6 Hz, 2H), 4.10 (t, *J* = 5.6 Hz, 2H), 3.89 (s, 6H), 3.87 (s, 3H), 2.81 (t, *J* = 5.6 Hz, 2H), 2.39 (s, 6H).

**<sup>13</sup>C NMR (126 MHz, CDCl<sub>3</sub>):** δ 167.08, 158.41, 153.37, 141.13, 130.62, 130.02, 129.50, 114.99, 104.52, 77.41, 77.16, 76.91, 65.88, 61.07, 58.18, 56.52, 45.76, 43.89. Spectral data matched those previously reported.<sup>2</sup>

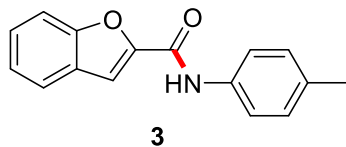

**Benzofuran-2-carboxylic acid *N*-(4-methylphenyl)amide (3):** Compound **3** was prepared according to Method C with the following modifications. In step 1: 1.5 equiv of DPDTC, 10 mol % DMAP, and 0.5 M TPGS-750-M/H<sub>2</sub>O for 16 h at 45 °C. In step 2: 1.1 equiv of amine was added at rt for 16 h. The crude product was purified by flash column chromatography (30 % EtOAc in hexanes) afforded **1** (37.1 mg, 59% yield) as white solid. **R<sub>f</sub>**: 0.40 (30% EtOAc/70% hexanes).

**<sup>1</sup>H NMR (500 MHz, CDCl<sub>3</sub>):** δ 8.31 (s, 1H), 7.73 (dt, *J* = 7.8, 1.0 Hz, 1H), 7.65 – 7.57 (m, 4H), 7.48 (ddd, *J* = 8.4, 7.2, 1.3 Hz, 1H), 7.35 (ddd, *J* = 8.0, 7.3, 1.0 Hz, 1H), 7.23 (d, *J* = 8.2 Hz, 2H), 2.38 (s, 3H).

**<sup>13</sup>C NMR (126 MHz, CDCl<sub>3</sub>):** δ 156.48, 154.80, 148.65, 134.68, 134.53, 129.69, 127.77, 127.18, 123.91, 122.86, 120.04, 111.80, 111.27, 77.28, 77.03, 76.77, 20.96. Spectral data matched those previously reported.<sup>3</sup>

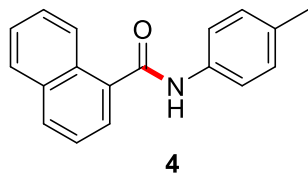

***N*-(*p*-Tolyl)-1-naphthamide (4):** Compound **4** was prepared according to Method C with the following modifications. In step 1: 1.5 equiv of DPDTC, 10 mol % DMAP, and 0.5 M TPGS-750-M/H<sub>2</sub>O for 16 h at 45 °C. In step 2: 1.1 equiv of amine was added at rt for 16 h. The crude product was purified by flash column chromatography (30 % EtOAc in hexanes) afforded **3** (60.6 mg, 98% yield) as white solid; **R<sub>f</sub>**: 0.20 (30% EtOAc/70% hexanes).

**<sup>1</sup>H NMR (500 MHz, CDCl<sub>3</sub>):** δ 8.40 (d, *J* = 8.1 Hz, 1H), 7.99 (d, *J* = 8.3 Hz, 1H), 7.95 – 7.91 (m, 1H), 7.77 (d, *J* = 7.0 Hz, 1H), 7.64 (s, 1H), 7.62 – 7.51 (m, 5H), 7.24 (d, *J* = 7.9 Hz, 2H), 2.39 (s, 3H).

**<sup>13</sup>C NMR (101 MHz, CDCl<sub>3</sub>):** δ 167.47, 135.51, 134.63, 134.36, 133.77, 130.95, 130.11, 129.64, 128.42, 127.32, 126.57, 125.33, 125.06, 124.75, 120.07, 77.37, 77.05, 76.74, 20.96. Spectral data matched those previously reported.<sup>4</sup>

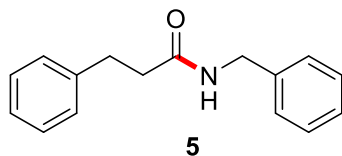

***N*-Benzyl-3-phenylpropionamide (5):** Compound (**5**) was obtained using General Procedure A on a 0.25 mmol scale. The crude product was purified via General Purification Method 1-B, as described in Section 5.2, to provide the desired compound as a white solid (53 mg, 88%).  $R_f = 0.41$  (50% EtOAc/50% hexanes).

**$^1\text{H}$  NMR (400 MHz,  $\text{CDCl}_3$ ):**  $\delta$  7.36 – 7.26 (m, 5H), 7.24 – 7.11 (m, 5H), 5.58 (s, 1H), 4.40 (d,  $J = 5.5$  Hz, 2H), 3.00 (t,  $J = 7.6$  Hz, 2H), 2.52 (t,  $J = 7.6$  Hz, 2H).

**$^{13}\text{C}$  NMR (126 MHz,  $\text{CDCl}_3$ ):**  $\delta$  172.03, 140.80, 138.19, 128.66, 128.57, 128.42, 127.72, 127.44, 126.27, 43.55, 38.44, 31.74. Spectral data matched those previously reported.<sup>5</sup>

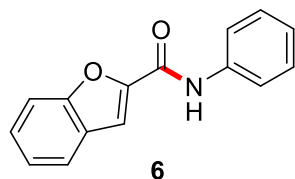

***N*-Phenylbenzofuran-2-carboxamide (6):** Compound (**6**) was obtained using General Procedure A on a 0.25 mmol scale. The crude product was purified via General Purification Method 1-A, as described in Section 5.1, to provide the desired compound as a white solid (53 mg, 90%).  $R_f = 0.71$  (50% EtOAc/50% hexanes).

**$^1\text{H}$  NMR (400 MHz,  $\text{CDCl}_3$ ):**  $\delta$  8.34 (s, 1H), 7.72 (ddt,  $J = 7.6, 5.4, 1.2$  Hz, 3H), 7.60 (d,  $J = 1.0$  Hz, 1H), 7.57 (dq,  $J = 8.2, 0.9$  Hz, 1H), 7.46 (ddd,  $J = 8.4, 7.2, 1.3$  Hz, 1H), 7.43 – 7.36 (m, 2H), 7.33 (ddd,  $J = 8.1, 7.2, 1.0$  Hz, 1H), 7.22 – 7.15 (m, 1H).  **$^{13}\text{C}$  NMR (126 MHz,  $\text{CDCl}_3$ ):**  $\delta$  156.64, 154.83, 148.48, 137.23, 129.20, 127.73, 127.29, 124.86, 123.96, 122.91, 120.07, 111.84, 111.50. Spectral data matched those previously reported.<sup>6</sup>

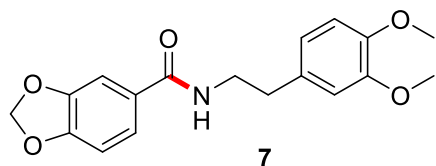

***N*-(3,4-Dimethoxyphenethyl)-3,4-methylenedioxybenzamide (7):** Compound **7** was obtained using General Procedure A on a 0.25 mmol scale. The crude product was purified via General Purification Method 1-A, as described in Section 5.1, to provide the desired compound as a white solid (81.6 mg, 99%).  $R_f = 0.24$  (50% EtOAc/50% hexanes).

**<sup>1</sup>H NMR (400 MHz, CDCl<sub>3</sub>):** δ 7.19 (d, *J* = 7.6 Hz, 2H), 6.84 – 6.71 (m, 4H), 6.08 (s, 1H), 6.00 (s, 2H), 3.85 (d, *J* = 9.0 Hz, 6H), 3.65 (q, *J* = 6.4 Hz, 2H), 2.85 (t, *J* = 6.7 Hz, 2H).

**<sup>13</sup>C NMR (101 MHz, CDCl<sub>3</sub>):** δ 166.75, 150.28, 149.09, 147.97, 147.74, 131.45, 128.87, 121.34, 120.69, 111.99, 111.43, 107.99, 107.53, 101.69, 55.87, 41.32, 35.26. Spectral data matched those previously reported.<sup>7</sup>

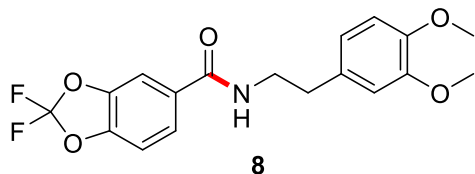

***N*-(3,4-Dimethoxyphenethyl)benzo[d][1,3]dioxole-5-carboxamide (8):** Compound **8** was obtained using General Procedure A on a 0.25 mmol scale. The crude product was purified via General Purification Method 1-A, as described in Section 5.1, to provide the desired compound as a white solid (89.7 mg, 98%). *R*<sub>f</sub> = 0.50 (50% EtOAc/50% hexanes).

**<sup>1</sup>H NMR (400 MHz, CDCl<sub>3</sub>):** δ 7.47 (d, *J* = 1.7 Hz, 1H), 7.41 (dd, *J* = 8.3, 1.8 Hz, 1H), 7.07 (d, *J* = 8.2 Hz, 1H), 6.83 (d, *J* = 7.9 Hz, 1H), 6.79 – 6.72 (m, 2H), 6.02 (d, *J* = 7.2 Hz, 1H), 3.86 (d, *J* = 7.4 Hz, 6H), 3.69 (td, *J* = 6.8, 5.8 Hz, 2H), 2.88 (t, *J* = 6.9 Hz, 2H).

**<sup>13</sup>C NMR (126 MHz, CDCl<sub>3</sub>):** δ 165.78, 149.17, 147.85, 145.87, 143.95, 131.67, 131.14, 131.06, 122.74, 120.68, 111.90, 111.43, 109.21, 108.79, 77.30, 77.05, 76.79, 55.94, 55.88, 41.41, 35.14.

**<sup>19</sup>F NMR (376 MHz, CDCl<sub>3</sub>):** δ -49.78.

**HRMS:** *m/z* calcd for C<sub>18</sub>H<sub>19</sub>F<sub>2</sub>NO<sub>5</sub>; 366.115305 [*M*+1]: found 366.1127.

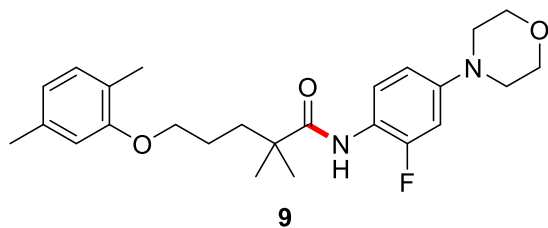

**5-(2,5-Dimethylphenoxy)-*N*-(2-fluoro-4-morpholinophenyl)-2,2-dimethylpentanamide (9):** Compound **9** was obtained using General Procedure A on a 0.25 mmol scale. The crude product was purified via General Purification Method 2, followed by flash chromatography (eluent: gradient 20% to 35% EtOAc/hexanes) to provide the desired compound as a white solid (104 mg, 97%). *R*<sub>f</sub> = 0.60 (50% EtOAc/50% hexanes).

**<sup>1</sup>H NMR (500 MHz, CDCl<sub>3</sub>):** δ 7.48 (dd, *J* = 14.1, 2.5 Hz, 1H), 7.32 (s, 1H), 7.09 (dd, *J* = 9.0, 2.4 Hz, 1H), 7.02 (d, *J* = 7.4 Hz, 1H), 6.90 (t, *J* = 9.0 Hz, 1H), 6.68 (d, *J* = 7.5 Hz, 1H), 6.63 (s, 1H), 3.96 (d, *J* = 5.2 Hz, 2H), 3.92 – 3.86 (m, 4H), 3.11 – 3.02 (m, 4H), 2.31 (s, 3H), 2.19 (s, 3H), 1.88 – 1.80 (m, 4H), 1.35 (s, 6H).

**<sup>13</sup>C NMR (126 MHz, CDCl<sub>3</sub>):** δ 175.64, 156.82, 156.41, 154.45, 136.58, 133.15 (d, *J* = 10.6 Hz), 130.36, 123.51, 120.91, 118.75, 115.84 (d, *J* = 3.2 Hz), 112.20, 109.31 (d, *J* = 25.3 Hz), 77.29, 77.04, 76.78, 67.84, 66.99, 51.15, 42.79, 37.66, 25.62, 25.15, 21.40, 15.85.

**<sup>19</sup>F NMR (376 MHz, CDCl<sub>3</sub>):** δ -121.05.

**HRMS:** *m/z* calcd for C<sub>22</sub>H<sub>25</sub>F<sub>6</sub>N<sub>2</sub>O<sub>3</sub>S; 429.5223 [M+1]: found 429.5222.

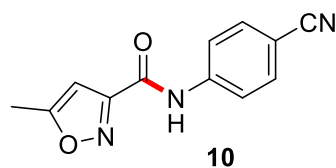

***N*-(4-Cyanophenyl)-5-methylisoxazole-3-carboxamide (10):** Compound **10** was obtained using General Procedure A on a 0.25 mmol scale. The crude product was purified via General Purification Method 2, followed by flash chromatography (eluent: gradient 30% EtOAc/70% hexanes to 50% EtOAc/50% hexanes) to provide the desired compound as a pale-yellow solid (54.5 mg, 96%). *R*<sub>f</sub> = 0.29 (30% EtOAc/70% hexanes).

**<sup>1</sup>H NMR (400 MHz, CDCl<sub>3</sub>):** δ 8.69 (s, 1H), 7.83 – 7.76 (m, 2H), 7.72 – 7.64 (m, 2H), 6.54 (d, *J* = 1.0 Hz, 1H), 2.53 (s, 3H).

**<sup>13</sup>C NMR (101 MHz, CDCl<sub>3</sub>):** δ 172.27, 158.46, 157.11, 140.99, 133.45, 119.83, 118.64, 107.96, 101.52, 12.46.

**HRMS:** *m/z* calcd for C<sub>12</sub>H<sub>10</sub>N<sub>3</sub>O<sub>2</sub>; 228.077302 [M+1]: found 228.0768.

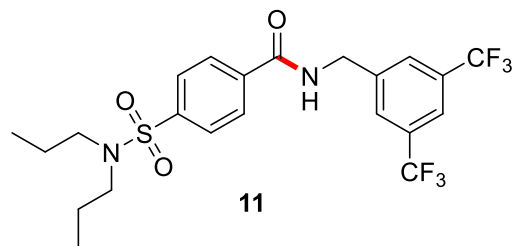

***N*-3,5-bis(Trifluoromethyl)benzyl)-4-(*N,N*-dipropylsulfamoyl)benzamide (11):** Compound **11** was obtained using General Procedure A on a 0.25 mmol scale. The crude product was purified

via General Purification Method 2, followed by flash chromatography (eluent: gradient 20% EtOAc/80% hexanes to 60% EtOAc/40% hexanes) to provide the desired compound as a white solid (101.2 mg, 79%).  $R_f$  = 0.37 (30% EtOAc/70% hexanes).

**$^1\text{H}$  NMR (400 MHz,  $\text{CDCl}_3$ ):**  $\delta$  7.88 – 7.78 (m, 5H), 7.73 (dd,  $J$  = 8.4, 2.3 Hz, 2H), 7.19 (p,  $J$  = 5.9 Hz, 1H), 4.75 (d,  $J$  = 6.0 Hz, 2H), 3.10 – 2.97 (m, 4H), 1.50 (h,  $J$  = 7.4 Hz, 4H), 0.83 (t,  $J$  = 7.4 Hz, 6H).

**$^{13}\text{C}$  NMR (126 MHz,  $\text{CDCl}_3$ ):**  $\delta$  166.57, 142.89, 140.78, 137.52, 132.01 (q,  $J$  = 33.3 Hz), 128.05 (q,  $J$  = 3.8 Hz), 127.93, 127.22, 124.29, 121.60 (h,  $J$  = 4.0 Hz), 77.29, 77.03, 76.78, 49.93, 43.31, 21.87, 11.09.

**$^{19}\text{F}$  NMR: (471 MHz,  $\text{CDCl}_3$ ):**  $\delta$  -62.82.

**HRMS:**  $m/z$  calcd for  $\text{C}_{22}\text{H}_{25}\text{F}_6\text{N}_2\text{OS}$ ; 511. 149008  $[\text{M}+1]$ : found 511.1490.

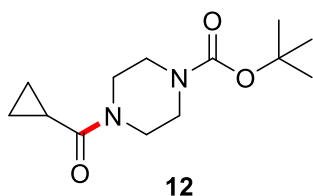

**1-*t*-Butoxycarbonyl-4-(cyclopropanecarbonyl) piperazine (12):** Compound **12** was prepared according to Method A as described above with modification of reaction time: thioester formation (4 h) and amide formation (4 h). The crude product was purified by flash column chromatography (15% EtOAc/80% hexanes) to afford **12** (55.2 mg, 87% yield) as white solid;  $R_f$  = 0.25 (30% EtOAc/70% hexanes).

**$^1\text{H}$  NMR (400 MHz,  $\text{CDCl}_3$ ):**  $\delta$  3.62 (s, 4H), 3.45 (d,  $J$  = 23.2 Hz, 4H), 1.71 (ddd,  $J$  = 12.7, 8.0, 4.7 Hz, 1H), 1.47 (s, 9H), 1.04 - 0.96 (m, 2H), 0.78 (dt,  $J$  = 8.0, 3.3 Hz, 2H).

**$^{13}\text{C}$  NMR (101 MHz,  $\text{CDCl}_3$ ):**  $\delta$  172.24, 154.65, 80.22, 45.35, 44.04, 43.48, 41.91, 28.41, 11.06, 7.56. Spectral data matched those previously reported.<sup>8</sup>

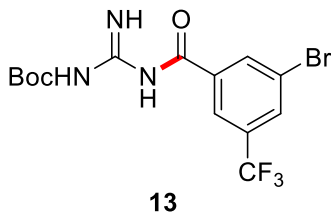

***t*-Butyl N-[N-(3-(trifluoromethyl)-5-bromo-benzoyl) carbamimidoyl]carbamate (13):** Compound **13** was prepared according to Method A as described above with modification of reaction time: thioester formation (4 h) and amide formation (4 h). The NMM (1 equiv) was added during amide bond formation. The crude product was purified by flash column chromatography

(10% EtOAc/hexanes) to afford **13** (96.4 mg, 94% yield) as a white solid; **R<sub>f</sub>**: 0.55 (15% EtOAc/85% hexanes).

**<sup>1</sup>H NMR (400 MHz, CDCl<sub>3</sub>):** δ 9.06 (s, 1H), 8.63 (s, 2H), 8.49 (t, *J* = 1.7 Hz, 1H), 8.37 (s, 1H), 7.85 (d, *J* = 2.0 Hz, 1H), 1.52 (s, 9H).

**<sup>13</sup>C NMR (126 MHz, CDCl<sub>3</sub>):** δ 175.67, 159.62, 152.92, 140.22, 135.50, 132.14 (q, *J* = 33.2 Hz), 130.97 (q, *J* = 3.78 Hz), 124.76, (q, *J* = 3.78 Hz), 122.93, (q, *J* = 273.4 Hz), 83.93, 27.77.

**<sup>19</sup>F NMR (376 MHz, CDCl<sub>3</sub>):** δ -62.80.

**HRMS:** *m/z* calcd for C<sub>14</sub>H<sub>15</sub>BrF<sub>3</sub>N<sub>3</sub>O<sub>3</sub>; [M+1]: 410.0327 found 410.0318.

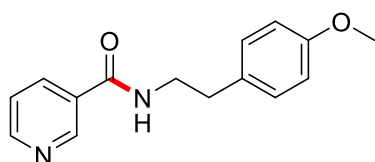

**14**

***N*-[2-(4-Methoxyphenyl)ethyl]-3-pyridinecarboxamide (**14**):** Compound **14** was obtained using General Procedure B on a 0.25 mmol scale. The crude product was purified via General Purification Method A to provide the desired compound as a pale-yellow oil (59 mg, 92%). **R<sub>f</sub>** = 0.44 (50% EtOAc/50% hexanes).

**<sup>1</sup>H NMR (500 MHz, CDCl<sub>3</sub>):** δ 8.72 – 8.67 (m, 1H), 7.86 (dd, *J* = 6.3, 2.8 Hz, 1H), 7.81 (td, *J* = 7.6, 1.9 Hz, 1H), 7.76 (dt, *J* = 7.9, 1.2 Hz, 1H), 7.37 (q, *J* = 4.3 Hz, 3H), 7.31 (t, *J* = 8.8 Hz, 4H), 2.32 (s, 3H).

**<sup>13</sup>C NMR (126 MHz, CDCl<sub>3</sub>):** δ 164.27, 158.26, 149.96, 148.05, 137.35, 131.00, 129.75, 126.09, 122.20, 114.04, 55.28, 40.97, 35.06.

**HRMS:** *m/z* calcd for C<sub>15</sub>H<sub>17</sub>N<sub>2</sub>O<sub>2</sub>; 257.1290 [M+1]: found 257.1294.

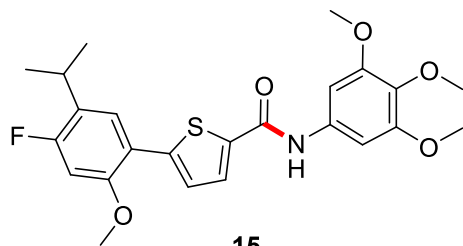

**15**

**5-(4-Fluoro-5-isopropyl-2-methoxyphenyl)-*N*-(3,4,5-trimethoxyphenyl)thiophene-2-carboxamide (**15**):** Compound **15** was obtained using the General Procedure, Method B, on a 0.25

mmol scale. The crude product was purified via General Purification Method 2, followed by silica gel column chromatography (eluent: gradient 30% EtOAc/70% hexanes to 50% EtOAc/50% hexanes) to provide the desired compound as a pale-yellow solid (101 mg, 89% yield).  $R_f$  = 0.46 (50% EtOAc/50% hexanes).

**$^1\text{H}$  NMR (400 MHz,  $\text{CDCl}_3$ ):**  $\delta$  7.81 (s, 1H), 7.61 (t,  $J$  = 5.2 Hz, 1H), 7.51 (dd,  $J$  = 8.4, 2.6 Hz, 1H), 7.41 (d,  $J$  = 4.0 Hz, 1H), 6.97 (s, 2H), 6.69 (dd,  $J$  = 11.8, 2.8 Hz, 1H), 3.92 (d,  $J$  = 4.5 Hz, 3H), 3.89 – 3.80 (m, 9H), 3.19 (p,  $J$  = 6.9 Hz, 1H), 1.28 (dd,  $J$  = 7.0, 2.2 Hz, 6H).

**$^{13}\text{C}$  NMR (126 MHz,  $\text{CDCl}_3$ ):**  $\delta$  162.06, 160.42, 160.08, 154.97 (d,  $J$  = 10.1 Hz), 153.36, 144.74, 137.16, 134.78, 133.95, 128.23, 127.62 (d,  $J$  = 15.6 Hz), 126.96 (d,  $J$  = 7.4 Hz), 125.12, 118.12, 99.95 (d,  $J$  = 27.6 Hz), 97.85, 77.30, 77.05, 76.79, 61.01, 56.11, 55.96, 26.94, 22.75.

**$^{19}\text{F}$  NMR (376 MHz,  $\text{CDCl}_3$ ):**  $\delta$  -114.95 (dd,  $J$  = 11.9, 8.5 Hz).

**HRMS:**  $m/z$  calcd for  $\text{C}_{24}\text{H}_{27}\text{FNO}_5\text{S}$ ; 460.159399 [ $\text{M}+1$ ]: found 460.1574.

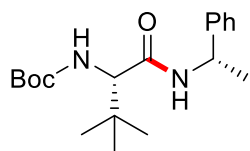

**16**

***N*-(*t*-Butoxycarbonyl)-(*S*)-alanine (*R*)-1-phenylethylamide (**16**):** Compound **16** was prepared according to Method B as described above with modification of 10 mol % DMAP, EtOAc (2 M), rt, then rt, and reaction time. The thioester formation (12 h) and amide formation (12 h.) The crude product was purified by flash column chromatography (20% EtOAc in hexanes) afforded **16** (77.5 mg, 93% yield) as white solid;  $R_f$  = 0.57 (30% EtOAc/70% hexanes).

**$^1\text{H}$  NMR (400 MHz,  $\text{DMSO}-d_6$ ):**  $\delta$  8.30 (d,  $J$  = 8.1 Hz, 1H), 7.29 (d,  $J$  = 1.5 Hz, 2H), 7.21 (tdd,  $J$  = 5.1, 4.0, 2.8 Hz, 1H), 6.37 (d,  $J$  = 9.7 Hz, 1H), 4.94 (p,  $J$  = 7.2 Hz, 1H), 3.87 (d,  $J$  = 9.7 Hz, 1H), 1.39 (s, 9H), 1.35 (d,  $J$  = 7.0 Hz, 3H), 0.82 (s, 9H).

**$^{13}\text{C}$  NMR (101 MHz,  $\text{DMSO}-d_6$ ):**  $\delta$  169.31, 155.22, 144.39, 128.13, 126.64, 126.11, 78.08, 61.85, 47.77, 34.21, 28.14, 26.62, 22.35. Spectral data matched those previously reported.<sup>9</sup>

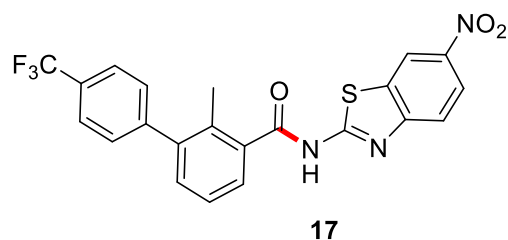

**2-Methyl-N-(6-nitrobenzo[d]thiazol-2-yl)-4'-(trifluoromethyl)-[1,1'-biphenyl]-3-carboxamide (17):** Compound **17** was obtained using General Procedure B on a 0.25 mmol scale. The crude product was purified via General Purification Method 2, followed by flash chromatography (eluent: 30% EtOAc/70% hexanes) to provide the desired compound as a yellow solid (93.4 mg, 82%).  $R_f$  = 0.66 (50% EtOAc/50% hexanes).

**$^1\text{H}$  NMR (400 MHz,  $\text{CDCl}_3$ ):**  $\delta$  8.72 – 8.67 (m, 1H), 7.86 (dd,  $J$  = 6.3, 2.8 Hz, 1H), 7.81 (td,  $J$  = 7.6, 1.9 Hz, 1H), 7.76 (dt,  $J$  = 7.9, 1.2 Hz, 1H), 7.41 – 7.34 (m, 3H), 7.31 (t,  $J$  = 8.8 Hz, 4H), 2.32 (s, 3H).

**$^{13}\text{C}$  NMR (126 MHz,  $\text{CDCl}_3$ ):**  $\delta$  192.33, 151.84, 150.60,  $\delta$  148.54 (d,  $J$  = 2.3 Hz), 142.55, 139.70, 138.51, 137.29, 134.03, 133.39, 130.72, 130.49, 127.72, 125.74, 123.73, 121.54, 121.13, 120.76, 119.70, 119.50, 17.77.

**$^{19}\text{F}$  NMR (376 MHz,  $\text{CDCl}_3$ ):**  $\delta$  -57.78.

**HRMS:**  $m/z$  calcd for  $\text{C}_{21}\text{H}_{16}\text{N}_3\text{O}_3\text{S}$ ; 390.091239 [ $M+2$ ]: found 390.0912.

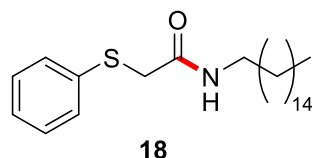

**N-Hexadecyl-2-(phenylthio)acetamide (18):** Compound **18** was obtained using General Procedure C on a 0.25 mmol scale. The crude product was purified via extraction with EtOAc (2 mL x 3). The EtOAc was washed with 1 M NaOH (2 mL x 3), followed by a brine wash (2 mL x 1). The EtOAc was evaporated via rotary evaporation and the resulting solid was washed with acetone, removing the yellow color and providing the desired compound as a white solid (97 mg, 99%).  $R_f$  = 0.70 (50% EtOAc/50% hexanes).

**$^1\text{H}$  NMR (500 MHz,  $\text{CDCl}_3$ ):**  $\delta$  7.28 (s, 2H), 7.06 (t,  $J$  = 7.6 Hz, 2H), 6.97 (t,  $J$  = 7.4 Hz, 1H), 6.32 (s, 1H), 3.42 (s, 2H), 3.14 (q,  $J$  = 6.7 Hz, 2H), 1.54 – 1.36 (m, 20H), 1.31 – 1.18 (m, 6H), 1.10 (q,  $J$  = 8.1 Hz, 2H), 1.02 (t,  $J$  = 6.6 Hz, 3H).

**<sup>13</sup>C NMR (126 MHz, CDCl<sub>3</sub>):** 166.36, 135.61, 129.06, 127.99, 127.89, 127.69, 127.50, 127.32, 125.91, 70.64, 39.42, 36.56, 31.99, 29.86, 29.84, 29.81, 29.79, 29.71, 29.62, 29.50, 29.48, 29.30, 26.69, 22.77, 14.02.

**HRMS:** *m/z* calcd for C<sub>24</sub>H<sub>42</sub>NOS; 392.2987 [M+1]: found 392.2978.

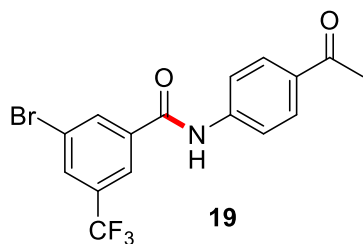

***N*-(4-Acetylphenyl)-3-bromo-5-(trifluoromethyl)benzamide (19):** Compound **19** was obtained using General Procedure C on a 0.25 mmol scale. The crude product was purified via General Purification Method 3, followed by flash chromatography (eluent: 30% EtOAc/70% hexanes) to provide the desired compound as a white solid (87 mg, 90%). **R<sub>f</sub>** = 0.66 (50% EtOAc/ 50% hexanes)

**<sup>1</sup>H NMR (400 MHz, CDCl<sub>3</sub>):** δ 8.64 (s, 1H), 8.21 (d, *J* = 1.7 Hz, 1H), 8.07 (d, *J* = 1.9 Hz, 1H), 7.99 – 7.93 (m, 2H), 7.91 (d, *J* = 1.8 Hz, 1H), 7.81 – 7.74 (m, 2H), 2.59 (s, 3H).

**<sup>13</sup>C NMR (126 MHz, CDCl<sub>3</sub>):** δ 197.45, 163.27, 141.85, 137.14, 133.83, 133.51, 132.93 (q, *J* = 33.7 Hz), 131.77 (q, *J* = 3.7 Hz), 129.82, 123.73, 123.43, 122.99, 122.96, 122.94, 122.91, 119.80, 77.30, 77.04, 76.79, 26.54.

**<sup>19</sup>F NMR (376 MHz, CDCl<sub>3</sub>):** δ -62.83.

**HRMS:** *m/z* calcd for C<sub>16</sub>H<sub>12</sub>BrF<sub>3</sub>NO<sub>2</sub>; [M+1] 386.000349: found 386.0044.

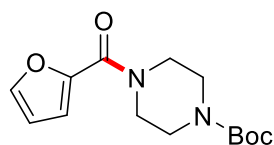

***t*-Butyl 4-(furan-2-carbonyl)piperazine-1-carboxylate (20):** Compound **20** was obtained using General Procedure C on a 0.5 mmol scale. The crude product was purified via General Purification Method 2, followed by flash chromatography (eluent: gradient 10% EtOAc/90% hexanes to 30% EtOAc/70% hexanes) to provide the desired compound as a white solid (108 mg, 77%). **R<sub>f</sub>** = 0.55 (50% EtOAc/50% hexanes).

**<sup>1</sup>H NMR (400 MHz, CDCl<sub>3</sub>):** δ 7.48 (dd, *J* = 1.8, 0.8 Hz, 1H), 7.03 (dd, *J* = 3.4, 0.8 Hz, 1H), 6.49 (dd, *J* = 3.5, 1.8 Hz, 1H), 3.77 (s, 4H), 3.54 – 3.47 (m, 4H), 1.48 (s, 9H).

**<sup>13</sup>C NMR (126 MHz, CDCl<sub>3</sub>):** δ 159.25, 154.59, 147.77, 143.85, 116.85, 111.42, 80.32, 43.41, 28.39. Spectral data matched those previously reported.<sup>10</sup>

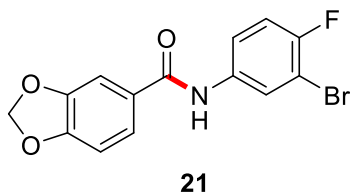

***N*-(3-Bromo-4-fluorophenyl)benzo[d][1,3]dioxole-5-carboxamide (21):** Compound **21** was obtained using General Procedure C on a 0.25 mmol scale. The crude product was purified via General Purification Method 2, followed by flash chromatography (eluent: gradient 20% EtOAc/80% hexanes to 50% EtOAc/50% hexanes, and 100% EtOAc until all product eluted) to provide the desired compound as a white solid (59 mg, 70%). **R<sub>f</sub>** = 0.39 (30% EtOAc/70% hexanes)

**<sup>1</sup>H NMR (400 MHz, DMSO-*d*<sub>6</sub>):** δ 10.34 (s, 1H), 7.94 – 7.86 (m, 1H), 7.62 (td, *J* = 8.4, 2.5 Hz, 1H), 7.60 – 7.46 (m, 3H), 7.04 (dd, *J* = 8.2, 2.6 Hz, 1H), 6.12 (d, *J* = 2.8 Hz, 2H).

**<sup>13</sup>C NMR (101 MHz, DMSO-*d*<sub>6</sub>):** δ 165.29, 159.60, 157.20, 150.84, 147.91, 141.01 (d, *J* = 10.3 Hz), 133.56, 128.53, 123.57, 117.94 (d, *J* = 3.1 Hz), 108.53 (d, *J* = 27.27 Hz), 108.36 (d, *J* = 23.23 Hz), 102.39, 101.42 (d, *J* = 21.1 Hz), 40.61, 40.40, 40.19, 39.98, 39.78, 39.57, 39.36.

**<sup>19</sup>F NMR (376 MHz, DMSO-*d*<sub>6</sub>):** δ -107.17 (t, *J* = 9.8 Hz).

**HRMS:** *m/z* calcd for C<sub>14</sub>H<sub>9</sub>BrFNO<sub>3</sub>Na; 359.9647 [*M*+23]: found 359.9639

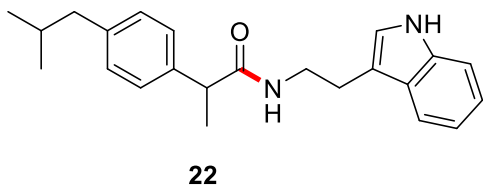

***N*-(2-(1H-Indol-3-yl)ethyl)-2-(4-isobutylphenyl)propanamide (22):** Compound **22** was obtained using General Procedure C on a 0.25 mmol scale. The crude product was purified via General Purification Method 3, followed by flash chromatography (eluent: 30% EtOAc/70% hexanes) to provide the desired compound as a white solid (85.4 mg, 98%). **R<sub>f</sub>** = 0.66 (50% EtOAc/50% hexanes).

**<sup>1</sup>H NMR (500 MHz, CDCl<sub>3</sub>):** δ 8.38 (s, 1H), 7.57 (d, *J* = 7.9 Hz, 1H), 7.46 – 7.33 (m, 1H), 7.25 – 7.01 (m, 6H), 6.77 (s, 1H), 5.57 (s, 1H), 3.66 – 3.52 (m, 2H), 3.49 (q, *J* = 8.4 Hz, 1H), 2.92 (hept, *J* = 7.7 Hz, 2H), 2.59 – 2.43 (m, 2H), 1.90 (p, *J* = 7.0 Hz, 1H), 1.54 (s, 3H), 1.04 – 0.87 (m, 6H).

**<sup>13</sup>C NMR (126 MHz, CDCl<sub>3</sub>):** δ 174.57, 140.63, 138.61, 136.42, 129.57, 127.40, 127.30, 122.18, 122.04, 119.36, 118.67, 112.69, 111.32, 77.38, 77.13, 76.87, 46.83, 45.06, 39.91, 30.25, 25.19, 22.46, 18.52.

**HRMS:** *m/z* calcd for C<sub>23</sub>H<sub>28</sub>N<sub>2</sub>O<sub>3</sub>Na; 371.2099 [M+23]; found 371.2088.

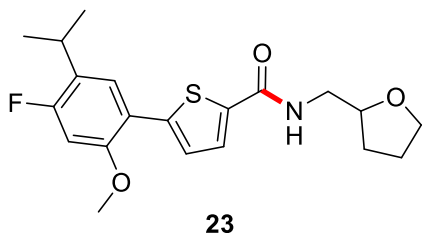

**5-(4-Fluoro-5-isopropyl-2-methoxyphenyl)-N-((tetrahydrofuran-2-yl)methyl)thiophene-2-carboxamide (23):** Compound **23** was obtained using General Procedure C on a 0.25 mmol scale. The crude product was purified via General Purification Method 3, followed by flash chromatography (eluent: 30 % EtOAc/70 % hexanes) to provide the desired compound as a white solid (89.6 mg, 95%). *R<sub>f</sub>* = 0.33 (50% EtOAc/50% hexanes).

**<sup>1</sup>H NMR (500 MHz, CDCl<sub>3</sub>):** δ 7.54 – 7.45 (m, 2H), 7.38 (d, *J* = 3.8 Hz, 1H), 6.69 (dd, *J* = 11.9, 2.6 Hz, 1H), 6.50 – 6.35 (m, 1H), 4.10 (qd, *J* = 7.2, 3.3 Hz, 1H), 3.92 (dd, *J* = 5.7, 3.0 Hz, 3H), 3.85 – 3.75 (m, 2H), 3.38 (ddd, *J* = 13.3, 7.2, 5.0 Hz, 1H), 3.20 (hept, *J* = 7.0 Hz, 1H), 2.05 (dtd, *J* = 12.3, 8.3, 4.3 Hz, 1H), 1.94 (p, *J* = 6.5 Hz, 2H), 1.65 (dq, *J* = 11.7, 7.7 Hz, 1H), 1.29 (dd, *J* = 7.2, 2.4 Hz, 6H).

**<sup>13</sup>C NMR (126 MHz, CDCl<sub>3</sub>):** δ 162.37, 161.86, 159.89, δ 154.92 (d, *J* = 10.0 Hz), 143.67, 137.03, 127.94, 127.46 (d, *J* = 15.7 Hz), 127.09 (d, *J* = 7.3 Hz), 125.09, 118.36 (d, *J* = 3.6 Hz), 99.97, 99.76, 77.91, 77.31, 77.06, 76.80, 68.22, 55.93, 43.49, 28.67, 26.90 (d, *J* = 1.4 Hz), 25.95, 22.75.

**<sup>19</sup>F NMR (376 MHz, CDCl<sub>3</sub>):** δ -115.59 (dd, *J* = 11.8, 8.4 Hz).

**HRMS:** *m/z* calcd for C<sub>20</sub>H<sub>24</sub>FNO<sub>3</sub>SN<sub>a</sub>; 400.1358 [M+23]; found 400.1348.

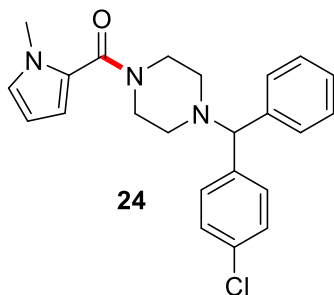

**(4-((4-Chlorophenyl) (phenyl) methyl) piperazin-1-yl) (1-methyl-1H-pyrrol-2-yl) methanone (24):** Compound **24** was obtained using General Procedure C on a 0.25 mmol scale. The crude

product was purified via General Purification Method 2, followed by flash chromatography (eluent: gradient 0% EtOAc/100% hexanes to 30% EtOAc/70% hexanes) to provide the desired compound as a white solid (71 mg, 72%).  $R_f$  = 0.57 (50% EtOAc/50% hexanes).

**$^1\text{H}$  NMR (500 MHz,  $\text{CDCl}_3$ ):**  $\delta$  7.40 (dt,  $J$  = 8.6, 4.6 Hz, 4H), 7.35 – 7.23 (m, 5H), 6.69 (s, 1H), 6.30 (qd,  $J$  = 3.5, 1.6 Hz, 1H), 6.07 (dq,  $J$  = 6.4, 2.7 Hz, 1H), 4.27 (d,  $J$  = 4.5 Hz, 1H), 3.79 (t,  $J$  = 4.0 Hz, 7H), 2.44 (q,  $J$  = 4.4 Hz, 4H).

**$^{13}\text{C}$  NMR (126 MHz,  $\text{CDCl}_3$ ):**  $\delta$  162.81, 141.65, 140.85, 132.82, 129.17, 128.83, 128.76, 127.83, 127.42, 126.21, 125.01, 112.87, 106.81, 75.33, 52.10, 45.37, 35.71.

**HRMS:**  $m/z$  calcd for  $\text{C}_{23}\text{H}_{25}\text{ClN}_3\text{O}$ ; 394.168615 [ $M+1$ ]; found 394.1685.

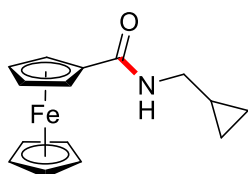

**25**

***N*-(Cyclopropylmethyl)ferrocenamide (25):** Compound **25** was obtained using General Procedure C on a 0.25 mmol scale. The crude product was purified via General Purification Method 2, followed by flash chromatography (eluent: gradient 10% EtOAc/90% hexanes to 30% EtOAc/70% hexanes) to provide the desired compound as an orange solid (65 mg, 97%).  $R_f$  = 0.45 (50% EtOAc/50% hexanes).

**$^1\text{H}$  NMR (500 MHz,  $\text{CDCl}_3$ ):**  $\delta$  5.83 (s, 1H), 4.70 (s, 2H), 4.41 – 4.17 (m, 5H), 3.26 (s, 2H), 1.39 – 0.88 (m, 2H), 0.73 – 0.08 (m, 4H).

**$^{13}\text{C}$  NMR (126 MHz,  $\text{CDCl}_3$ ):**  $\delta$  170.11, 77.29, 77.04, 76.79, 76.37, 70.34, 69.76, 68.10, 44.33, 11.14, 3.46.

**HRMS:**  $m/z$  calcd for  $\text{C}_{15}\text{H}_{17}\text{FeNOH}^+$ ; 284.0738 [ $M+1$ ]; found 284.0748.

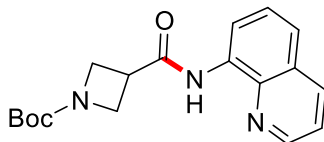

**26**

***t*-Butyl 3-(quinolin-8-ylcarbamoyl)azetidine-1-carboxylate (26):** Compound **26** was obtained using General Procedure C on a 0.25 mmol scale. The crude product was purified via General Purification Method 2, followed by flash chromatography (30% EtOAc/70% hexanes) to provide the desired compound as a yellow oil (44.8 mg, 55%).  $R_f$  = 0.54 (50% EtOAc/50% hexanes).

**<sup>1</sup>H NMR (500 MHz, CDCl<sub>3</sub>):** δ 9.87 (s, 1H), 8.86 – 8.76 (m, 2H), 8.18 (d, *J* = 8.3 Hz, 1H), 7.55 (d, *J* = 7.2 Hz, 2H), 7.47 (dd, *J* = 8.3, 4.2 Hz, 1H), 4.36 – 4.29 (m, 2H), 4.21 (t, *J* = 8.6 Hz, 2H), 3.60 (td, *J* = 8.8, 4.4 Hz, 1H), 1.47 (s, 9H).

**<sup>13</sup>C NMR (126 MHz, CDCl<sub>3</sub>):** δ 170.15, 156.23, 148.29, 138.30, 136.47, 134.02, 127.93, 127.37, 122.00, 121.76, 116.75, 79.79, 77.33, 77.07, 76.82, 34.85, 28.40.

**HRMS:** *m/z* calcd for C<sub>18</sub>H<sub>21</sub>N<sub>3</sub>O<sub>3</sub>; 328.1661 [*M*+1]: found 328.1673.

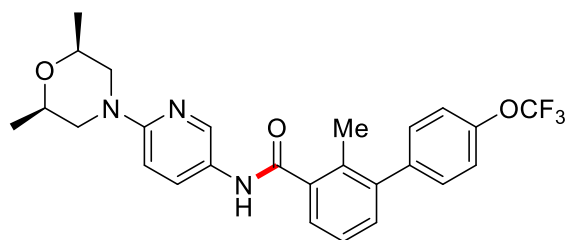

**27**

***N*-(6-((2*S*,6*R*)-2,6-Dimethylmorpholino)pyridin-3-yl)-2-methyl-4'-(trifluoromethoxy)-[1,1'-biphenyl]-3-carboxamide (27):** Compound **27** was prepared according to Method A as described above with modification of reaction time: thioester formation (4 h) and amide formation (4 h). The crude product was purified by flash column chromatography (10-30% EtOAc/hexanes) afforded **27** (114.0 mg, 94% yield) as light pink solid; *R<sub>f</sub>* = 0.34 (30% EtOAc/70% hexanes).

**<sup>1</sup>H NMR (400 MHz, DMSO-*d*<sub>6</sub>):** δ 10.23 (s, 1H), 8.42 (d, *J* = 2.6 Hz, 1H), 7.92 (dd, *J* = 9.1, 2.7 Hz, 1H), 7.49 – 7.42 (m, 5H), 7.42 – 7.20 (m, 2H), 6.85 (d, *J* = 9.1 Hz, 1H), 4.12 – 3.95 (m, 2H), 3.60 (dq, *J* = 12.4, 6.2, 2.3 Hz, 2H), 2.32 (dd, *J* = 12.7, 10.5 Hz, 2H), 2.20 (s, 3H), 1.14 (d, *J* = 6.2 Hz, 6H).

**<sup>13</sup>C NMR (101 MHz, CDCl<sub>3</sub>):** δ 168.68, 156.80, 148.47, 148.45, 148.43, 142.15, 140.25, 139.88, 137.64, 133.38, 131.55, 131.26, 130.90, 130.62, 126.08, 125.80, 125.77, 121.79, 120.71, 119.24, 116.68, 106.87, 71.55, 51.17, 18.98, 17.62.

**<sup>19</sup>F NMR (376 MHz, CDCl<sub>3</sub>):** δ -57.77. Spectral data matched those previously reported.<sup>11</sup>

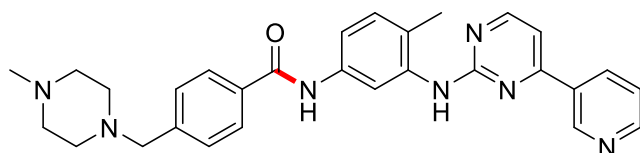

**28**

***N*-(4-Methyl-3-((4-(pyridin-3-yl)pyrimidin-2-yl)amino)phenyl)-4-((4-methylpiperazin-1-yl)methyl)benzamide (28):** Compound **28** was prepared according to Method A as described

above with modification of 2 M EtOAc and 10 mol % DMAP used for step 1. The thioester formation (4 h) and amide formation (3 h). The crude product was purified by washing with 1 M NaOH and centrifugation to remove supernatant to afford **27** (109.8 mg, 89% yield) as an off white solid;  $R_f$  = 0.36 (10% MeOH/90% DCM).

**$^1\text{H}$  NMR (400 MHz, DMSO- $d_6$ ):**  $\delta$  10.14 (s, 1H), 9.26 (d,  $J$  = 2.3 Hz, 1H), 8.95 (s, 1H), 8.67 (d,  $J$  = 4.8 Hz, 1H), 8.57 – 8.39 (m, 2H), 8.06 (d,  $J$  = 2.2 Hz, 1H), 7.88 (d,  $J$  = 7.8 Hz, 2H), 7.57 – 7.33 (m, 5H), 7.18 (d,  $J$  = 8.3 Hz, 1H), 3.50 (s, 2H), 2.33 (br. S, 8H), 2.20 (s, 3H), 2.13 (s, 3H).

**$^{13}\text{C}$  NMR (101 MHz, DMSO- $d_6$ ):**  $\delta$  165.73, 162.08, 161.66, 159.94, 151.85, 148.68, 142.59, 138.27, 137.69, 134.89, 134.24, 132.69, 130.50, 129.09, 128.05, 124.25, 117.68, 117.20, 107.98, 62.10, 55.18, 53.06, 46.22, 18.13. Spectral data matched those previously reported.<sup>12</sup>

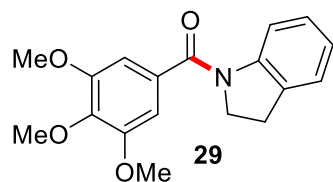

**Indolin-1-yl(3,4,5-trimethoxyphenyl)methanone (29):** Compound **29** was prepared according to Method A as described above with modification of reaction time: thioester formation (4 h) and amide formation (6 h). The crude product was purified by flash column chromatography (20% EtOAc/hexanes) afforded **29** (72.1 mg, 92% yield) as white solid;  $R_f$  = 0.54 (50% EtOAc/50% hexanes).

**$^1\text{H}$  NMR (400 MHz,  $\text{CDCl}_3$ ):**  $\delta$  7.93 (brs, 1H), 7.21 (d,  $J$  = 7.4 Hz, 1H), 7.13 (d,  $J$  = 13.4 Hz, 1H), 7.01 (t,  $J$  = 7.4 Hz, 1H), 6.77 (s, 2H), 4.20 - 4.05 (m, 2H), 3.87 (d,  $J$  = 18.7 Hz, 9H), 3.12 (t,  $J$  = 8.2 Hz, 2H).

**$^{13}\text{C}$  NMR (101 MHz,  $\text{CDCl}_3$ ):**  $\delta$  168.69, 153.48, 142.62, 139.86, 132.55, 132.30, 127.34, 125.07, 124.05, 117.06, 104.63, 61.08, 56.39, 50.63, 28.13. Spectral data matched those previously reported.<sup>13</sup>

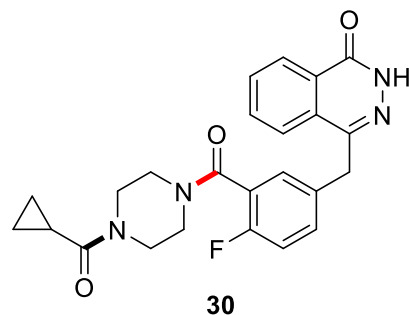

**N-(4-Methyl-3-((4-(pyridin-3-yl)pyrimidin-2-yl)amino)phenyl)-4-((4-methylpiperazin-1-yl)methyl)benzamide (30):** Compound **30** was prepared according to Method B as described above with modification of 2 M EtOAc and 10 mol % DMAP used for step 1 and reaction time.

The thioester formation (6 h) and amide formation (6 h). The crude product was purified by flash column chromatography (1-5% MeOH in CH<sub>2</sub>Cl<sub>2</sub>) afforded **30** (93.4 mg, 86% yield) as light pink solid. **R<sub>f</sub>** = 0.30 (5% MeOH/95 % DCM).

**<sup>1</sup>H NMR (400 MHz, CDCl<sub>3</sub>):** δ 10.25 (s, 1H), 8.52 – 8.35 (m, 1H), 7.86 – 7.61 (m, 3H), 7.43 – 7.28 (m, 2H), 7.05 (t, *J* = 8.9 Hz, 1H), 4.28 (s, 2H), 3.69 (d, *J* = 65.8 Hz, 6H), 3.32 (d, *J* = 19.7 Hz, 2H), 1.75 (s, 1H), 1.07 – 0.97 (m, 2H), 0.80 (s, 2H).

**<sup>13</sup>C NMR (126 MHz, CDCl<sub>3</sub>):** δ 172.37, 165.26, 161.05, 157.0 (d, *J* = 248.0 Hz), 145.52, 134.59 (d, *J* = 3 Hz), 133.63, 131.70 (d, *J* = 8.8 Hz), 131.56, 129.55, 129.17, 128.25, 127.12, 125.01, 123.68, (d, *J* = 17.4 Hz), 116.17 (d, *J* = 21.4 Hz), 47.14-46.81 (m), 45.66-45.15, 42.27, 42.02, 37.69, 11.04, 7.71.

**<sup>19</sup>F NMR (376 MHz, CDCl<sub>3</sub>):** δ -117.61. Spectral data matched those previously reported.<sup>14</sup>

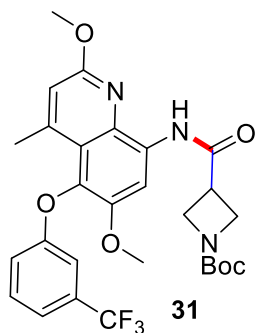

**Dimethoxy-4-methyl-5-(3-(trifluoromethyl)phenoxy)quinolin-8-yl)carbamoyl)azetidine-1-carboxylate (**31**):** Compound **31** was prepared according to Method B as described above with modification of reaction time. The thioester formation (4 h) and amide formation (6 h). The crude product was purified by flash column chromatography (10-15% EtOAc in hexanes) afforded **31** (133.8 mg, 95% yield) as light pink solid; **R<sub>f</sub>** = 0.45 (30% EtOAc/70% hexanes).

**<sup>1</sup>H NMR (400 MHz, CDCl<sub>3</sub>):** δ 9.84 (s, 1H), 8.77 (s, 1H), 7.36 (t, *J* = 8.0 Hz, 1H), 7.04 (t, *J* = 2.1 Hz, 1H), 6.93 (dd, *J* = 8.2, 2.6 Hz, 1H), 6.72 (d, *J* = 1.2 Hz, 1H), 4.37 – 4.16 (m, 4H), 4.03 (s, 3H), 3.84 (s, 3H), 3.50 (tt, *J* = 8.4, 5.9 Hz, 1H), 2.61 (d, *J* = 1.1 Hz, 3H), 1.46 (s, 9H).

**<sup>13</sup>C NMR (126 MHz, CDCl<sub>3</sub>):** δ 170.22, 160.20, 158.81, 156.32, 147.91, 146.92, 132.51, 132.43, 132.17, 131.91, 131.66, 131.31, 130.13, 123.75 (q, *J* = 272.1 Hz), 120.23, 118.49, 118.46, 118.43, 118.40, 118.16, 115.95, 111.99, 111.96, 111.92, 111.89, 105.62, 79.99, 56.61, 53.11, 52.12, 35.35, 28.35, 23.07.

**<sup>19</sup>F NMR (376 MHz, CDCl<sub>3</sub>):** δ -62.60.

**HRMS:** *m/z* calcd for C<sub>28</sub>H<sub>31</sub>F<sub>3</sub>N<sub>3</sub>O<sub>6</sub>; 562.2165 [*M*+1]: found 562.2177.

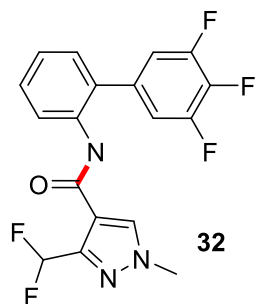

**3-(Difluoromethyl)-1-methyl-N-(3',4',5'-trifluoro-[1,1'-biphenyl]-2-yl)-1H-pyrazole-4-carboxamide (32):** Compound **32** was prepared according to Method B as described above with modification of 2 M EtOAc and 10 mol % DMAP used for step 1 and reaction time. The thioester formation (4 h) and amide formation (14 h). The crude product was purified by flash column chromatography (10-20% ethyl acetate in hexanes) afforded **32** (85.7 mg, 90% yield) as white solid;  $R_f$  = 0.55 (50% EtOAc/50% hexanes).

**$^1\text{H}$  NMR (400 MHz,  $\text{CDCl}_3$ - $d_6$ ):**  $\delta$  8.20 (d,  $J$  = 8.2 Hz, 1H), 7.96 (s, 1H), 7.80 (s, 1H), 7.43 (ddd,  $J$  = 8.5, 6.0, 3.1 Hz, 1H), 7.25 – 7.19 (m, 2H), 7.09 – 6.90 (m, 2H), 6.64 (t,  $J$  = 54.2 Hz, 1H), 3.92 (d,  $J$  = 1.0 Hz, 3H).

**$^{13}\text{C}$  NMR (126 MHz,  $\text{DMSO}-d_6$ ):**  $\delta$  160.91, 156.41, 151.51, 151.48, 151.44, 151.40, 150.56, 149.55, 149.52, 149.48, 149.44, 145.47, 145.28, 145.10, 139.58, 139.46, 139.34, 138.09, 137.60, 137.48, 137.36, 136.60, 136.56, 136.53, 136.49, 136.46, 136.43, 135.47, 134.72, 133.22, 130.69, 129.37, 128.50, 127.32, 126.10, 122.65, 116.23, 116.21, 116.18, 113.77, (dd,  $J$  = 4.7 Hz, 16.6 Hz), 111.64 (t,  $J$  = 232.9 Hz), 39.83.

**$^{19}\text{F}$  NMR (376 MHz,  $\text{CDCl}_3$ ):**  $\delta$  -109.45, -131.04 (d,  $J_{\text{F,F}}$  = 21.3 Hz), -159.13 (t,  $J_{\text{F,F}}$  = 21.4 Hz) ppm. Spectral data matched those previously reported.<sup>15</sup>

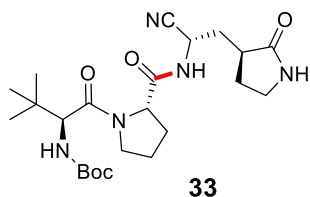

**tert-butyl ((S)-1-((S)-2-(((S)-1-cyano-2-((S)-2-oxopyrrolidin-3-yl) ethyl) carbamoyl) pyrrolidin-1-yl)-3,3-dimethyl-1-oxobutan-2-yl) carbamate (33):** Compound **33** was prepared with the following modifications to Method B: 10 mol % DMAP, 2 M EtOAc at rt for 12 h was used for step 1, and for step 2, reaction was stirred at rt for 16 h. The crude product was purified by flash column chromatography (2% MeOH in  $\text{CH}_2\text{Cl}_2$ ) afforded **33** (104.3 mg, 90% yield) as white solid;  $R_f$  = 0.26 (5% MeOH /95% DCM).

**<sup>1</sup>H NMR (400 MHz, DMSO-*d*<sub>6</sub>):** δ 8.85 (d, *J* = 8.7 Hz, 1H), 7.63 (s, 1H), 6.59 (d, *J* = 9.0 Hz, 1H), 4.93 (ddd, *J* = 11.1, 8.6, 4.9 Hz, 1H), 4.24 – 4.07 (m, 2H), 3.70 (d, *J* = 9.8 Hz, 1H), 3.57 (dt, *J* = 9.8, 7.0 Hz, 1H), 3.17 – 2.89 (m, 2H), 2.25 – 2.01 (m, 3H), 1.96 (q, *J* = 6.4, 5.9 Hz, 1H), 1.90 – 1.59 (m, 4H), 1.35 (s, 9H), 0.91 (s, 9H).

**<sup>13</sup>C NMR (101 MHz, DMSO-*d*<sub>6</sub>):** δ 177.60, 171.79, 169.69, 155.59, 119.76, 78.03, 59.38, 58.39, 47.86, 37.58, 36.63, 34.72, 34.25, 29.15, 28.17, 26.94, 26.27, 24.97.

**HRMS:** *m/z* calcd for C<sub>23</sub>H<sub>37</sub>N<sub>5</sub>O<sub>5</sub>Na; 486.2692 [M+23]: found 486.2677.

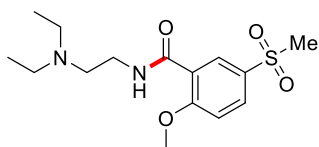

**34**

***N*-(2-Diethylaminoethyl)-2-methoxy-5-methylsulfonylbenzamide (34):** Compound **34** was prepared according to Method A as described above with modification of reaction time: thioester formation (5 h) and amide formation (4 h). The crude product was purified by flash column chromatography [(MeOH:NH<sub>4</sub>OH:DCM) (3:1:96)] afforded **34** (71 mg, 86% yield) as yellow solid; *R*<sub>f</sub> = 0.35 (10% MeOH/90% DCM).

**<sup>1</sup>H NMR (500 MHz, MeOD):** δ 8.48 – 8.40 (m, 1H), 8.06 (dt, *J* = 8.9, 2.2 Hz, 1H), 7.38 (dt, *J* = 8.8, 1.7 Hz, 1H), 4.07 (d, *J* = 1.1 Hz, 3H), 3.52 (td, *J* = 6.8, 1.4 Hz, 2H), 3.11 (s, 3H), 2.71 (td, *J* = 6.8, 1.7 Hz, 2H), 2.64 (q, *J* = 7.1, 1.7 Hz, 4H), 1.10 (td, *J* = 7.2, 1.4 Hz, 7H).

**<sup>13</sup>C NMR (126 MHz, MeOD):** δ 166.10, 162.72, 134.24, 133.26, 131.84, 124.10, 113.92, 57.35, 52.32, 48.09, 44.59, 38.53, 11.89. Spectral data matched those previously reported.<sup>16</sup>

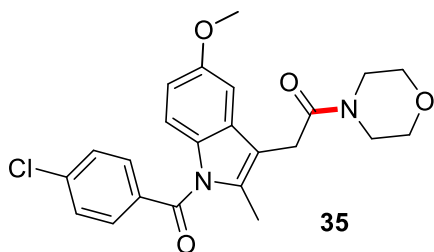

**35**

**2-[1-(4-Chlorobenzoyl)-5-methoxy-2-methyl-1H-indol-3-yl]-1-(4-morpholinyl)ethanone (35):** Compound (**34**) was prepared according to Method A as described above with modification of reaction time. The thioester formation (4 h) and amide formation (4 h.) The crude product was purified by flash column chromatography (10% EtOAc / hexanes) afforded **34** (86.5 mg, 81% yield) as white solid; *R*<sub>f</sub> = 0.48 (30% EtOAc/70 % hexanes).

**<sup>1</sup>H NMR** (400 MHz, CDCl<sub>3</sub>) δ 7.73 - 7.59 (m, 2H), 7.55 - 7.39 (m, 2H), 6.98 (d, *J* = 2.6 Hz, 1H), 6.81 (d, *J* = 9.0 Hz, 1H), 6.65 (dd, *J* = 9.0, 2.5 Hz, 1H), 3.82 (s, 3H), 3.69 (d, *J* = 21.3 Hz, 6H), 3.61 - 3.45 (m, 4H), 2.38 (s, 3H).

**<sup>13</sup>C NMR** (126 MHz, CDCl<sub>3</sub>) δ 168.96, 168.36, 156.14, 139.42, 135.34, 133.96, 131.30, 130.99, 130.95, 130.71, 129.25, 115.01, 113.14, 111.62, 101.64, 67.03, 66.61, 55.83, 46.47, 42.48, 30.23, 13.54. Spectral data matched those previously reported.<sup>17</sup>

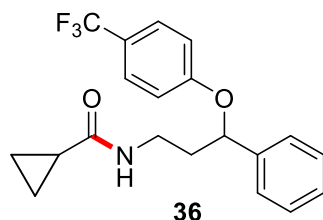

***N*-Methyl-*N*-(3-phenyl-3-(4-(trifluoromethyl) phenoxy) propyl) cyclopropane carboxamide (36):** Compound 35 was prepared according to Method B as described above with modification of reaction time and the addition of NMM as a base for step 2. Thioester formation (3 h) and amide formation (4 h). The crude product was purified by flash column chromatography (30% EtOAc/70% hexanes) afforded **36** (87.0 mg, 92% yield) as white solid; **R<sub>f</sub>** = 0.27 (30% EtOAc/70% hexanes).

**<sup>1</sup>H NMR (500 MHz, CDCl<sub>3</sub>):** δ 7.45 (dd, *J* = 8.8, 4.4 Hz, 4H), 7.41 - 7.30 (m, 8H), 6.90 (dd, *J* = 8.6, 6.6 Hz, 4H), 5.23 (dt, *J* = 8.4, 4.0 Hz, 2H), 3.87 (dt, *J* = 15.4, 7.8 Hz, 1H), 3.74 - 3.47 (m, 3H), 3.16 (s, 3H), 2.98 (s, 3H), 2.35 - 2.18 (m, 3H), 2.18 - 2.08 (m, 1H), 1.77 - 1.62 (m, 3H), 1.02 - 0.84 (m, 4H), 0.83 - 0.61 (m, 3H), 0.52 - 0.28 (m, 1H).

**<sup>13</sup>C NMR (126 MHz, CDCl<sub>3</sub>):** δ 173.60, 173.49, 160.46, 160.17, 140.82, 140.28, 129.08, 128.87, 128.24, 127.97, 126.96, 126.93, 126.90, 126.87, 126.84, 126.81, 126.78, 125.81, 125.64, 125.54, 125.43, 123.61, 123.38, 123.35, 123.27, 123.25, 123.09, 122.99, 122.83, 122.73, 122.47, 115.81, 115.75, 78.54, 46.29, 45.63, 37.85, 36.48, 35.86, 34.22, 11.31, 10.81, 7.90, 7.72, 7.58, 7.55.

**HRMS:** *m/z* calcd for C<sub>21</sub>H<sub>22</sub>F<sub>3</sub>NO<sub>2</sub>Na; 400.150033 [M+23]; found 400.1512.

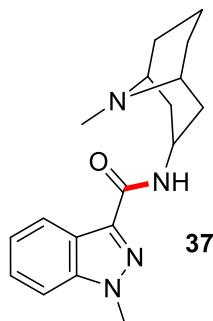

**1-Methyl-N-((1R, 3R, 5S)-9-methyl-9-azabicyclo[3.3.1]nonan-3-yl)-1H-indazole-3-carboxamide (37):** Compound **38** was prepared according to Method B as described above with modification of reaction time: thioester formation (4 h) and amide formation (6 h). The crude product was purified by flash column chromatography (0-10% MeOH in DCM) and afforded **37** (63 mg, 81% yield) as a white solid;  $R_f = 0.31$  (10% MeOH/DCM).

**$^1\text{H}$  NMR (400 MHz,  $\text{CDCl}_3$ ):**  $\delta$  8.39 (dt,  $J = 8.1, 1.1$  Hz, 1H), 7.45 – 7.36 (m, 2H), 7.30 – 7.26 (m, 1H), 6.79 (d,  $J = 8.4$  Hz, 1H), 4.63 – 4.51 (m, 1H), 4.09 (s, 3H), 3.11 (d,  $J = 10.7$  Hz, 2H), 2.59 – 2.50 (m, 2H), 2.53 (s, 3H), 2.06-1.98 (m, 3H), 1.45 – 1.35 (m, 2H), 1.08 (d,  $J = 10.7$  Hz, 2H).

**$^{13}\text{C}$  NMR (101 MHz,  $\text{CDCl}_3$ ):**  $\delta$  161.89, 141.26, 137.59, 126.77, 123.03, 122.89, 122.42, 108.98, 77.41, 77.09, 76.77, 51.27, 40.76, 40.63, 35.90, 33.12, 24.79, 14.36. Spectral data matched those previously reported.<sup>18</sup>

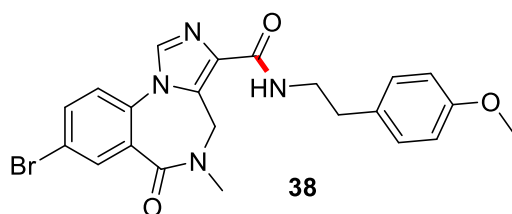

**8-Bromo-N-(4-methoxyphenethyl)-5-methyl-6-oxo-5,6-dihydro-4H-benzo[f]imidazo [1,5-a][1,4] diazepine-3-carboxamide (38):** Compound **36** was prepared according to Method A as described above with modification of reaction time: thioester formation (4 h) and amide formation (3 h). The crude product was purified by flash column chromatography (1-3% MeOH in DCM) afforded **38** (105.3 mg, 90% yield) as white solid;  $R_f = 0.3$  (5% MeOH/95% DCM).

**$^1\text{H}$  NMR (400 MHz,  $\text{DMSO}-d_6$ ):**  $\delta$  8.34 (s, 1H), 8.20 (t,  $J = 6.0$  Hz, 1H), 7.99 (d,  $J = 2.4$  Hz, 1H), 7.94 (dd,  $J = 8.6, 2.4$  Hz, 1H), 7.70 (d,  $J = 8.6$  Hz, 1H), 7.20 – 7.08 (m, 2H), 6.91 – 6.75 (m, 2H), 5.16 (s, 1H), 4.47 (s, 1H), 3.71 (s, 3H), 3.46 (q,  $J = 6.9$  Hz, 2H), 3.06 (s, 3H), 2.77 (t,  $J = 7.4$  Hz, 2H).

**<sup>13</sup>C NMR (101 MHz, DMSO-*d*<sub>6</sub>):** δ 164.56, 162.01, 157.65, 135.22, 135.12, 134.08, 131.84, 131.28, 131.26, 130.67, 130.33, 129.56, 124.94, 120.44, 113.77, 54.95, 41.38, 40.01, 35.32, 34.39.

**HRMS:** *m/z* calcd for C<sub>22</sub>H<sub>22</sub>BrN<sub>4</sub>O<sub>3</sub>; 469.0875 [M+1]: found 469.0851.

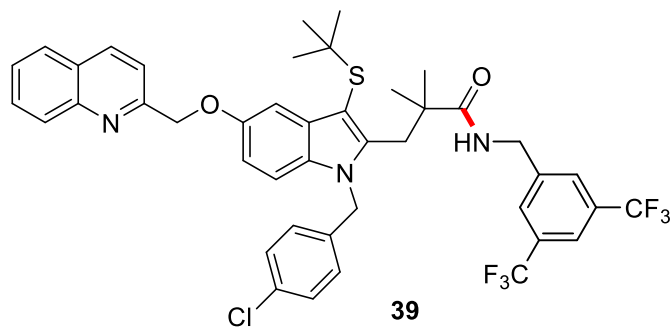

***N*-(3,5-bis(Trifluoromethyl)benzyl)-3-(3-(*t*-butylthio)-1-(4-chlorobenzyl)-5-(quinolin-2-ylmethoxy)-1H-indol-2-yl)-2,2-dimethylpropanamide (39):** Compound **39** was prepared according to Method B as described above with modification of 2 M EtOAc used for step 1 and reaction time: thioester formation (6 h) and amide formation (4 h). The crude product was purified by flash column chromatography (10% EtOAc/hexanes) afforded **39** (178.3 mg, 88% yield) as white solid; *R*<sub>f</sub> = 0.70 (30% EtOAc/70% hexanes).

**<sup>1</sup>H NMR (400 MHz, DMSO-*d*<sub>6</sub>):** δ 8.42 – 8.31 (m, 2H), 8.08 – 8.00 (m, 1H), 7.96 (dd, *J* = 8.1, 1.5 Hz, 2H), 7.90 (d, *J* = 1.7 Hz, 2H), 7.78 (ddd, *J* = 8.4, 6.8, 1.5 Hz, 1H), 7.68 – 7.57 (m, 2H), 7.29 (d, *J* = 6.5 Hz, 2H), 7.21 (d, *J* = 8.8 Hz, 1H), 7.13 (d, *J* = 2.5 Hz, 1H), 6.87 (dd, *J* = 8.8, 2.5 Hz, 1H), 6.82 – 6.73 (m, 2H), 5.36 (d, *J* = 15.2 Hz, 4H), 4.42 (d, *J* = 5.8 Hz, 2H), 3.15 (s, 2H), 1.10 (s, 6H), 0.96 (s, 9H).

**<sup>13</sup>C NMR (126 MHz, CDCl<sub>3</sub>):** δ 177.90, 158.69, 153.88, 147.72, 147.65, 143.70, 141.06, 137.20, 137.00, 136.31, 133.20, 132.63, 132.50, 132.25, 132.08 (q, *J*<sub>C-F</sub> = 31.0 Hz), 129.83, 129.05, 129.00, 127.98, 127.95, 127.92, 127.79, 127.72, 127.14, 126.52, 124.37, 122.20, 121.64, 121.61, 121.58, 121.55, 121.52, 120.03, 119.35, 113.18, 112.62, 111.09, 105.52, 105.26, 103.93, 77.41, 77.16, 76.91, 71.89, 48.65, 48.34, 48.27, 47.37, 47.19, 44.47, 44.33, 43.05, 34.66, 31.25, 26.07.

**<sup>19</sup>F NMR (376 MHz, DMSO-*d*<sub>6</sub>):** δ -61.37.

**HRMS:** *m/z* calcd for C<sub>43</sub>H<sub>41</sub>ClF<sub>6</sub>N<sub>3</sub>O<sub>2</sub>S; [M+1]: 812.2512 found 812.2501.

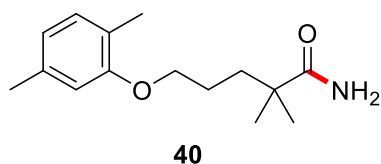

**5-(2,5-Dimethylphenoxy)-2,2-dimethylpentanamide (40):** Compound **40** was obtained using General Procedure A on a 0.25 mmol scale. The crude product was purified via General Purification Method 1-C, as described in Section 2.2.1, to provide the desired compound as a white solid (50.5 mg, 81%).  $R_f = 0.50$  (50% EtOAc/50% hexanes).

**$^1\text{H}$  NMR (500 MHz, DMSO- $d_6$ ):**  $\delta$  7.04 (s, 1H), 6.98 (d,  $J = 7.4$  Hz, 1H), 6.79 (s, 1H), 6.70 (s, 1H), 6.62 (d,  $J = 7.4$  Hz, 1H), 3.89 (t,  $J = 6.1$  Hz, 2H), 2.25 (s, 3H), 2.09 (s, 3H), 1.63 (qd,  $J = 6.7$ , 3.2 Hz, 2H), 1.58 (dt,  $J = 11.9$ , 3.4 Hz, 2H), 1.09 (s, 6H).

**$^{13}\text{C}$  NMR (126 MHz, DMSO- $d_6$ ):**  $\delta$  179.41, 157.00, 136.50, 130.50, 122.95, 120.94, 112.52, 68.25, 41.50, 37.34, 25.85, 25.19, 21.52, 16.04. Spectral data matched those previously reported.<sup>19</sup>

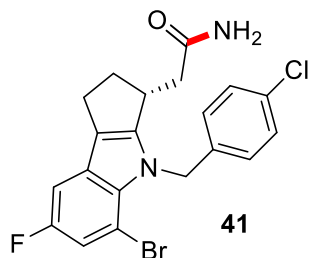

**(R)-2-(5-Bromo-4-(4-chlorobenzyl)-7-fluoro-1,2,3,4-tetrahydrocyclopenta[b]indol-3-yl)acetamide (41):** Compound **41** was prepared according to Method A as described above with modification of reaction time: thioester formation (4 h) and amide formation (0.5 h). The crude product was purified by 1 M NaOH wash and centrifugation to afford **41** (104.5 mg, 96% yield) as white solid;  $R_f = 0.49$  (5% MeOH/95% DCM).

**$^1\text{H}$  NMR (400 MHz, DMSO- $d_6$ ):**  $\delta$  7.36 (dd,  $J = 8.6$ , 6.6 Hz, 3H), 7.25 (dd,  $J = 9.0$ , 2.5 Hz, 1H), 7.14 (dd,  $J = 9.1$ , 2.5 Hz, 1H), 6.84 (dd,  $J = 11.0$ , 9.0 Hz, 3H), 5.81 (d,  $J = 17.8$  Hz, 1H), 5.60 (d,  $J = 17.7$  Hz, 1H), 3.49 (s, 1H), 2.90 - 2.54 (m, 4H), 2.33 (dd,  $J = 14.1$ , 4.3 Hz, 1H), 2.22 - 1.96 (m, 2H).

**$^{13}\text{C}$  NMR (101 MHz, DMSO- $d_6$ ):**  $\delta$  172.48, 157.42, 155.06, 152.75, 138.57, 133.45, 131.56, 128.62, 127.07, 127.01, 126.91, 118.77, 118.72, 113.44, 113.15, 103.61, 103.39, 102.84, 102.72, 48.05, 40.20, 40.15, 39.99, 39.94, 39.78, 39.73, 39.57, 39.52, 39.31, 39.10, 38.89, 35.36, 34.76, 22.51.

**$^{19}\text{F}$  NMR (376 MHz, DMSO- $d_6$ ):**  $\delta$  -123.16.

**HRMS:**  $m/z$  calcd for  $C_{20}H_{17}BrClFN_2ONa$ ; 457.0095  $[M+23]$ ; found 457.0109

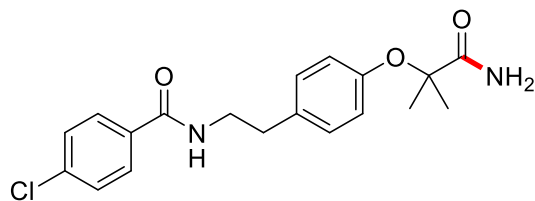

**42**

***N*-(4-(1-Amino-2-methyl-1-oxopropan-2-yl)oxyphenethyl)-4-chlorobenzamide (42):** Compound **42** was obtained using General Procedure A on a 0.25 mmol scale. The crude product was purified via General Purification Method 1-C, as described in Section 2.2.1, to provide the desired compound as a white solid (72 mg, 80%).  $R_f$  = 0.33 (50% EtOAc/50% hexanes).

**$^1H$  NMR (500 MHz, DMSO- $d_6$ ):**  $\delta$  8.72 (t,  $J$  = 5.5 Hz, 1H), 7.85 (d,  $J$  = 8.3 Hz, 2H), 7.53 (d,  $J$  = 8.2 Hz, 2H), 7.49 (s, 1H), 7.25 (s, 1H), 7.14 (d,  $J$  = 8.1 Hz, 2H), 6.83 (d,  $J$  = 8.1 Hz, 2H), 2.78 (t,  $J$  = 7.5 Hz, 2H), 1.64 (s, 2H), 1.39 (s, 6H).

**$^{13}C$  NMR (126 MHz, DMSO- $d_6$ ):**  $\delta$  176.42, 165.54, 153.73, 136.33, 133.80, 133.43, 129.71, 129.54, 128.81, 120.19, 80.26, 41.49, 40.57, 40.48, 40.40, 40.31, 40.23, 40.14, 40.06, 39.97, 39.89, 39.81, 39.64, 39.47, 34.67, 25.38. Spectral data matched those previously reported.<sup>18</sup>

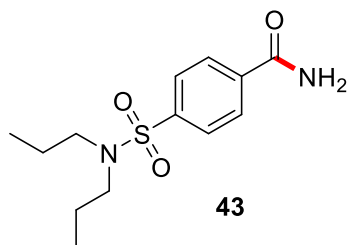

**43**

**4-(*N,N*-Dipropylsulfamoyl)benzamide (43):** Compound **43** was obtained using General Procedure A on a 0.25 mmol scale. The crude product was purified via General Purification Method 1-C, as described in Section 2.2.1, to provide the desired compound as a white solid (70.3 mg, 99%).  $R_f$  = 0.17 (50% EtOAc/50% hexanes).

**$^1H$  NMR (500 MHz, DMSO- $d_6$ ):**  $\delta$  8.20 (s, 1H), 8.06 (d,  $J$  = 8.1 Hz, 2H), 7.87 (d,  $J$  = 7.9 Hz, 2H), 7.62 (s, 1H), 3.03 (d,  $J$  = 7.8 Hz, 4H), 1.47 (h,  $J$  = 7.4 Hz, 4H), 0.80 (t,  $J$  = 7.4 Hz, 6H).

**$^{13}C$  NMR (126 MHz, DMSO- $d_6$ ):**  $\delta$  167.18, 142.22, 138.30, 128.90, 127.21, 50.09, 22.08, 11.42. Spectral data matched those previously reported.<sup>19</sup>

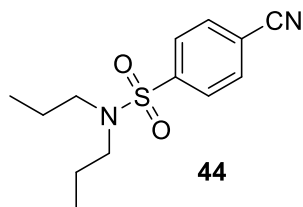

**4-Cyano-*N,N*-dipropylbenzenesulfonamide (44):** Compound **44** was obtained as described in section 7.1 on a 0.25 mmol scale. The crude product was purified via flash chromatography (30% EtOAc/70% hexanes) to provide the desired compound as a white solid (59.9 mg, 90%).  $R_f$  = 0.38 (20% EtOAc/80% hexanes).

**$^1\text{H}$  NMR (500 MHz,  $\text{CDCl}_3$ ):**  $\delta$  7.93 (d,  $J$  = 8.0 Hz, 2H), 7.81 (d,  $J$  = 8.0 Hz, 2H), 3.16 – 3.07 (m, 4H), 1.64 – 1.49 (m, 4H), 0.88 (t,  $J$  = 7.5 Hz, 6H).

**$^{13}\text{C}$  NMR (126 MHz,  $\text{CDCl}_3$ ):**  $\delta$  144.63, 132.88, 127.61, 117.43, 115.95, 49.93, 21.94, 11.12. Spectral data matched those previously reported.<sup>20</sup>

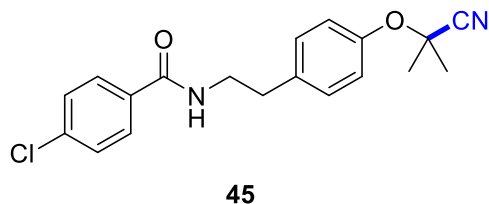

**4-Chloro-*N*-(4-((2-cyanopropan-2-yl)oxy)phenethyl)benzamide (45):** Compound **45** was prepared as described in section 4.2.  $R_f$  = 0.44 (20% EtOAc/80% hexanes).

**$^1\text{H}$  NMR (500 MHz,  $\text{CDCl}_3$ ):**  $\delta$  7.65 – 7.59 (m, 2H), 7.41 – 7.35 (m, 2H), 7.20 (d,  $J$  = 8.6 Hz, 2H), 7.17 – 7.10 (m, 2H), 6.10 (s, 1H), 3.69 (q,  $J$  = 6.7 Hz, 2H), 2.91 (t,  $J$  = 6.9 Hz, 2H), 1.71 (s, 6H).

**$^{13}\text{C}$  NMR (126 MHz,  $\text{CDCl}_3$ ):**  $\delta$  166.57, 137.85, 135.39, 133.06, 130.01, 129.01, 128.38, 122.33, 120.98, 77.41, 77.16, 76.91, 72.36, 41.32, 35.07, 27.66.

**HRMS:**  $m/z$  calcd for  $\text{C}_{19}\text{H}_{20}\text{ClN}_2\text{O}_2$ ;  $[\text{M}+1]$ : 343.1213 found 343.1214, calc'd for  $\text{C}_{19}\text{H}_{21}\text{ClN}_2\text{O}_2\text{Na}$   $[\text{M}+23]$ : 365.1033, found 365.1032.

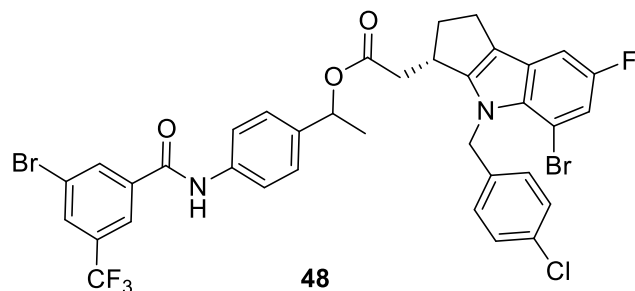

**1-(4-(3-Bromo-5-(trifluoromethyl) benzamido) phenyl) ethyl 2-((S)-5-bromo-4-(4-chlorobenzyl)-7-fluoro-1,2,3,4-tetrahydrocyclopenta[b]indol-3-yl) acetate (48):** Compound **48** was prepared as described in section 4.3.

**<sup>1</sup>H NMR (400 MHz, CDCl<sub>3</sub>):** δ 8.17 (s, 1H), 8.05 (d, *J* = 10.8 Hz, 2H), 7.92 (s, 1H), 7.55 (dd, *J* = 14.0, 8.2 Hz, 2H), 7.27 (s, 1H), 7.20 (dd, *J* = 10.9, 8.2 Hz, 2H), 7.04 (td, *J* = 8.1, 2.8 Hz, 2H), 6.78 (dd, *J* = 11.8, 8.1 Hz, 2H), 5.82 (tt, *J* = 7.1, 3.5 Hz, 1H), 5.72 (dd, *J* = 17.4, 13.8 Hz, 1H), 5.59 – 5.44 (m, 1H), 3.51 (dt, *J* = 10.3, 6.0 Hz, 1H), 2.91 – 2.63 (m, 3H), 2.51 (ddd, *J* = 15.4, 7.7, 4.2 Hz, 1H), 2.41 (ddd, *J* = 15.4, 9.2, 2.6 Hz, 1H), 2.21 (qd, *J* = 10.0, 3.8 Hz, 1H), 1.48 (dd, *J* = 12.8, 6.6 Hz, 3H), 1.26 (q, *J* = 6.8 Hz, 1H).

**<sup>13</sup>C NMR (126 MHz, CDCl<sub>3</sub>):** δ 171.36, 171.17 (d, *J* = 1.7 Hz), 162.98, 157.92, 156.02, 150.66 (d, *J* = 1.7 Hz), 138.15 (d, *J* = 8.3 Hz), 137.70 (d, *J* = 6.9 Hz), 137.46 (d, *J* = 2.4 Hz), 136.96 (d, *J* = 4.7 Hz), 134.15, 133.72, 133.01, 132.88 (q, *J* = 31.5 Hz), 131.67 – 131.40 (m), 128.91, 127.18 (d, *J* = 2.6 Hz), 127.04 (d, *J* = 8.0 Hz), 126.88, 123.37, 122.82 (q, *J* = 3.7 Hz), 122.72 (q, *J* = 273.4 Hz), 121.63, 120.59 (d, *J* = 8.2 Hz), 119.99 (d, *J* = 4.8 Hz), 114.45 (dd, *J* = 28.5, 5.1 Hz), 103.65 (d, *J* = 22.5 Hz), 103.21 (dd, *J* = 11.9, 2.1 Hz), 72.37 (d, *J* = 4.5 Hz), 60.49, 53.46, 48.58 (d, *J* = 3.1 Hz), 39.35, 35.49 (dd, *J* = 16.2, 2.6 Hz), 29.72, 22.90 (d, *J* = 2.9 Hz), 21.91 (d, *J* = 5.2 Hz), 21.09, 14.20.

**<sup>19</sup>F NMR (471 MHz, CDCl<sub>3</sub>):** δ -62.79, -123.29 (dt, *J* = 28.8, 8.7 Hz).

**HRMS:** *m/z* calcd for C<sub>36</sub>H<sub>28</sub>Br<sub>2</sub>ClF<sub>4</sub>N<sub>2</sub>O<sub>3</sub>; 805.0091 [*M*+1]: found 805.0168.

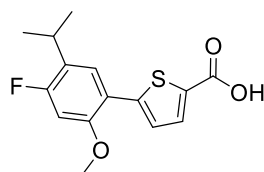

**5-(4-Fluoro-5-isopropyl-2-methoxyphenyl)thiophene-2-carboxylic acid:** This compound was prepared as described in section 3.1. *R<sub>f</sub>* = 0.05 (1:1 EtOAc/hexanes).

**<sup>1</sup>H NMR (500 MHz, DMSO-*d*<sub>6</sub>):** δ 7.70 (d, *J* = 8.5 Hz, 1H), 7.65 (dd, *J* = 17.5, 3.9 Hz, 2H), 7.05 (d, *J* = 12.5 Hz, 1H), 3.93 (s, 3H), 3.14 (p, *J* = 7.0 Hz, 1H), 1.25 (d, *J* = 6.9 Hz, 6H).

**<sup>13</sup>C NMR (126 MHz, DMSO-*d*<sub>6</sub>):** δ 163.35, 161.34, 159.38, 154.68 (d, *J* = 10.5 Hz), 144.07, 132.34, 126.91 (d, *J* = 15.6 Hz), 126.67 (d, *J* = 7.3 Hz), 125.55, 117.85, 117.83, 100.61 (d, *J* = 27.5 Hz), 56.35, 40.11, 40.02, 39.94, 39.85, 39.78, 39.69, 39.61, 39.52, 39.35, 39.19, 39.02, 26.53, 22.54.

**<sup>19</sup>F NMR (376 MHz, DMSO-*d*<sub>6</sub>):** δ -115.55.

**HRMS:** *m/z* calcd for C<sub>15</sub>H<sub>15</sub>FO<sub>3</sub>SN<sub>a</sub>; 317.0623 [M+23]: found 317.060.

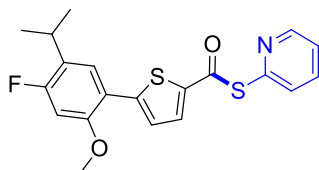

**S-(Pyridin-2-yl) 5-(4-fluoro-5-isopropyl-2-methoxyphenyl)thiophene-2-carbothioate :** This compound was obtained using the General Procedure, Method A, on a 0.25 mmol scale. The crude product was purified via silica gel column chromatography (eluent: 30% EtOAc/70% hexanes) to provide the desired compound as a pale-yellow solid (101 mg, 89% yield). *R*<sub>f</sub> = 0.46 (1:1 EtOAc/hexanes). *R*<sub>f</sub> = 0.55 (50% EtOAc/50% hexanes).

**<sup>1</sup>H NMR (400 MHz, CDCl<sub>3</sub>):** δ 8.65 (d, *J* = 4.8 Hz, 1H), 7.88 (d, *J* = 4.1 Hz, 1H), 7.85 – 7.74 (m, 2H), 7.52 (d, *J* = 8.4 Hz, 1H), 7.46 (d, *J* = 4.2 Hz, 1H), 7.32 (h, *J* = 3.8 Hz, 1H), 6.69 (d, *J* = 11.9 Hz, 1H), 3.92 (s, 3H), 3.19 (hept, *J* = 6.9 Hz, 1H), 1.28 (d, *J* = 7.0 Hz, 6H).

**<sup>13</sup>C NMR (126 MHz, CDCl<sub>3</sub>):** δ 180.84, 162.42, 160.43, 155.23 (d, *J* = 10.1 Hz), 151.50, 150.38, 147.99, 139.19, 137.13, 131.96, 130.60, 127.74 (d, *J* = 15.6 Hz), 127.19 (d, *J* = 7.4 Hz), 125.36, 123.54, 117.87, 99.99 (d, *J* = 27.6 Hz), 77.29, 77.04, 76.79, 56.00, 26.99, 22.73.

**<sup>19</sup>F NMR (376 MHz, CDCl<sub>3</sub>):** δ -114.06 (t, *J* = 10.2 Hz).

**HRMS:** *m/z* calcd for C<sub>20</sub>H<sub>18</sub>FNO<sub>2</sub>S<sub>2</sub>; 388.084125 [M+1]: found 388.0818.

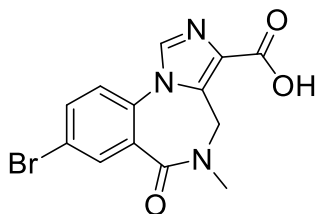

**8-Bromo-5-methyl-6-oxo-5,6-dihydro-4H-benzo[f] imidazo [1,5-a] [1,4] diazepine-3-carboxylic acid:**

**<sup>1</sup>H NMR (500 MHz, DMSO-*d*<sub>6</sub>):** δ 12.84 (s, 1H), 8.36 (s, 1H), 8.00 (d, *J* = 2.4 Hz, 1H), 7.95 (dd, *J* = 8.6, 2.4 Hz, 1H), 7.72 (d, *J* = 8.6 Hz, 1H), 5.01 (s, 1H), 4.52 (s, 1H).

**<sup>13</sup>C NMR (126 MHz, DMSO-*d*<sub>6</sub>):** δ 164.91, 164.28, 136.64, 135.74, 135.53, 134.47, 131.77, 130.81, 128.99, 125.57, 121.10, 42.29, 40.59, 40.49, 40.42, 40.33, 40.25, 40.16, 40.08, 39.99, 39.92, 39.83, 39.66, 39.49, 35.64.

**HRMS:** *m/z* calcd for C<sub>13</sub>H<sub>11</sub>BrN<sub>3</sub>O<sub>3</sub>; [M+1]: 335.9984 found 335.9946.

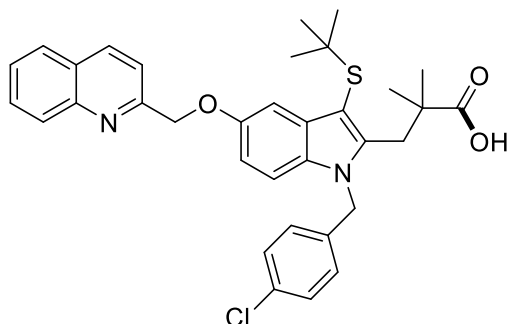

**3-(3-(*t*-Butylthio)-1-(4-chlorobenzyl)-5-(quinolin-2-ylmethoxy)-1H-indol-2-yl)-2,2-dimethylpropanoic acid:**

**<sup>1</sup>H NMR (500 MHz, DMSO-*d*<sub>6</sub>):** δ 8.45 (d, *J* = 8.5 Hz, 1H), 8.10 (d, *J* = 8.5 Hz, 1H), 8.02 (s, 1H), 7.83 (t, *J* = 7.7 Hz, 1H), 7.72 (d, *J* = 8.5 Hz, 1H), 7.64 (t, *J* = 7.5 Hz, 1H), 7.32 (dd, *J* = 8.5, 5.7 Hz, 3H), 7.16 (d, *J* = 2.6 Hz, 1H), 6.91 (dd, *J* = 8.8, 2.5 Hz, 1H), 6.83 (d, *J* = 8.2 Hz, 2H), 5.46 (d, *J* = 15.9 Hz, 4H), 3.18 (s, 2H), 2.08 (s, 1H), 1.09 (s, 6H), 0.99 (s, 9H).

**<sup>13</sup>C NMR (101 MHz, DMSO-*d*<sub>6</sub>):** δ 178.95, 158.64, 153.56, 146.51, 144.34, 138.48, 137.57, 132.31, 132.24, 130.79, 129.05, 128.52, 128.08, 127.75, 127.28, 120.00, 112.84, 112.28, 104.37, 103.63, 71.30, 49.08, 48.20, 47.08, 43.60, 40.63, 40.42, 40.21, 40.00, 39.79, 39.59, 39.38, 33.73, 31.20, 25.56, 1.64.

**HRMS:** *m/z* calcd for C<sub>34</sub>H<sub>35</sub>ClN<sub>2</sub>O<sub>3</sub>S; 587.21352 [M+1]: found 587.2141.

## 12. References

1. A. Wood, J. Kincaid, B. H. Lipshutz, *Green Chem.* **2022**, 24, 2853-2858.
2. C. Lescot, D. U. Nielsen, I. S. Makarov, A. T. Lindhardt, K. Daasbjerg, T. Skrydstrup, *J. Am. Chem. Soc.* **2014**, 136, 6142–6147.
3. Choi, M.; Jo, H.; Park, H.-J.; Kumar, A. S.; Lee, J.; Yun, J.; Kim, Y.; Han, S.; Jung, J.-K.; Cho, J.; Lee, K.; Kwak, J.-H. Lee, H. *Bioorg. Med. Chem. Lett.* 2015, 25, 2545-2549.4.
4. C. Pan, L. Wang, J. Han, *Adv. Synth. Catal.* **2021**, 364, 268-273.
5. P. V. Ramachandran, H. J. Hamann, *Org. Lett.* **2021**, 23, 8, 2938-2942.
6. C. Chen, L. Ling, M. Luo, X. Zeng, *Bull. Chem. Soc. Jpn.* **2021**, 94, 762-766.
7. R. Zhu, Z. Xu, W. Ding, S. Liu, X. Shi, X. Lu, *Chin. J. Chem.* **2014**, 32, 1039-1048.

8. L. Wang, X. Zhou, M. Xiao, N. Jiang, F. Liu, W. Zhou, X. Wanga, Z. Zheng, S. Li, *Bioorg. Med. Chem. Lett.* **2014**, *24*, 3739-3743.
9. Z. Zhou, X. Zheng, J. Liu, J. Li, P. Wen, H. Wang, *Synlett*, **2017**, 28, 999-1003.
10. H. Long, X. Hu, B. Wang, Q. Wang, R. Wang, S. Liu, F. Xiong, Z. Jiang, X-Qi. Zhang, W-C. Ye, H. Wang, *J. Med. Chem.* **2021**, *64*, 12089-12108.
11. B. S. Takale, R. R. Thakore, F. Y. Kongab, B. H. Lipshutz. *Green Chem.* **2019**, *21*, 6258-6262.
12. J. C. Vantourout, H. N. Miras, A. Isidro-Llobet, S. Sproules, A. J. B. Watson, *J. Am. Chem. Soc.* **2017**, *139*, 4769-4779.
13. C. W. Cheung, J. Ma, X. Hu, *J. Am. Chem. Soc.* **2018**, *140*, 6789–6792.
14. H. P. Collin, W. J. Reis, D. U. Nielsen, A. T. Lindhardt, M. S. Valle, R. P. Freitas, T. Skrydstrup, *Org. Lett.* **2019**, *21*, 5775–5778.
15. P. Orecchia, D. S. Petkova, R. Goetz, *Green Chem.*, **2021**, *23*, 8169-8180.
16. X. Xu, H. Feng, L. Huang, X. Liu, *J. Org. Chem.* **2018**, *83*, 7962-7969.
17. T. Liu, X. Zhang, Z. Peng, J. Zhao, *Green Chem.*, **2021**, *23*, 9916-9921.
18. Opie, C. R.; Noda, H.; Shibasaki, M.; Kumagai, N. *Chem. Eur. J.* **2019**, *25*, 4648-4653.
19. Miao, Y.-Q.; Kang, J.-X.; Ma, Y.-N.; Chen, X. *Green Chem.* **2021**, *23*, 3595-3599.
20. Wang, Z.; Wang, X.; Ura Y.; Nishihara, Y. *Org. Lett.* **2019**, *21*, 6779-6784.

## 13. NMR Spectra

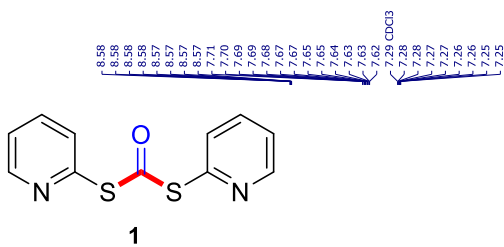<sup>1</sup>H NMR (400 MHz, CDCl<sub>3</sub>):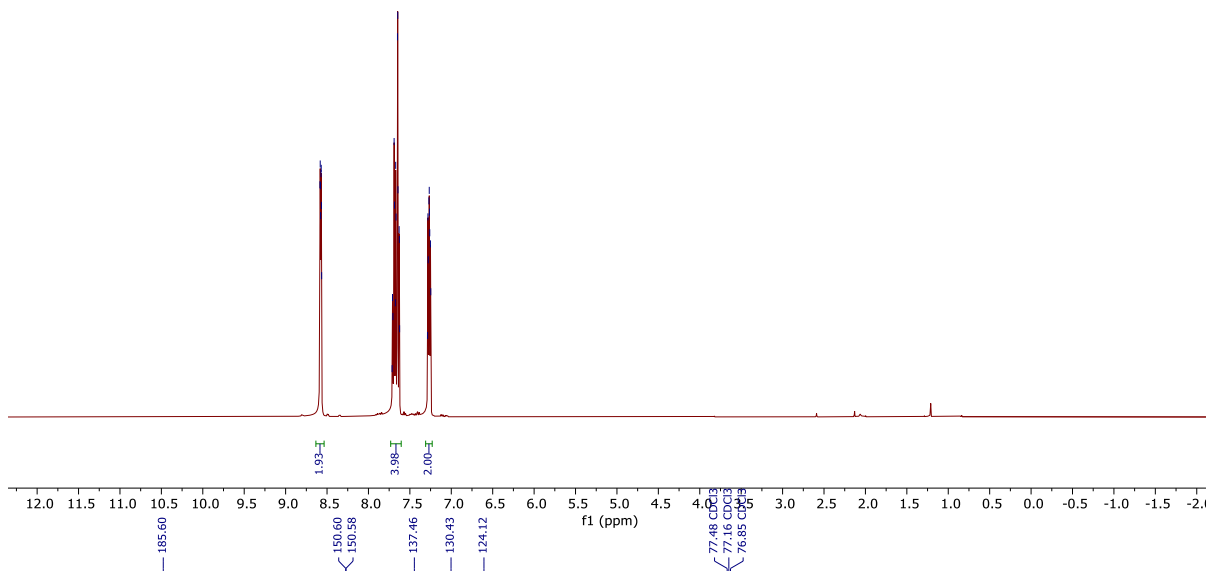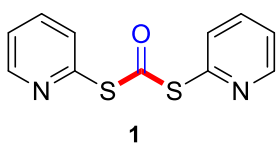

**$^{13}\text{C}$  NMR (101 MHz,  $\text{CDCl}_3$ ):**

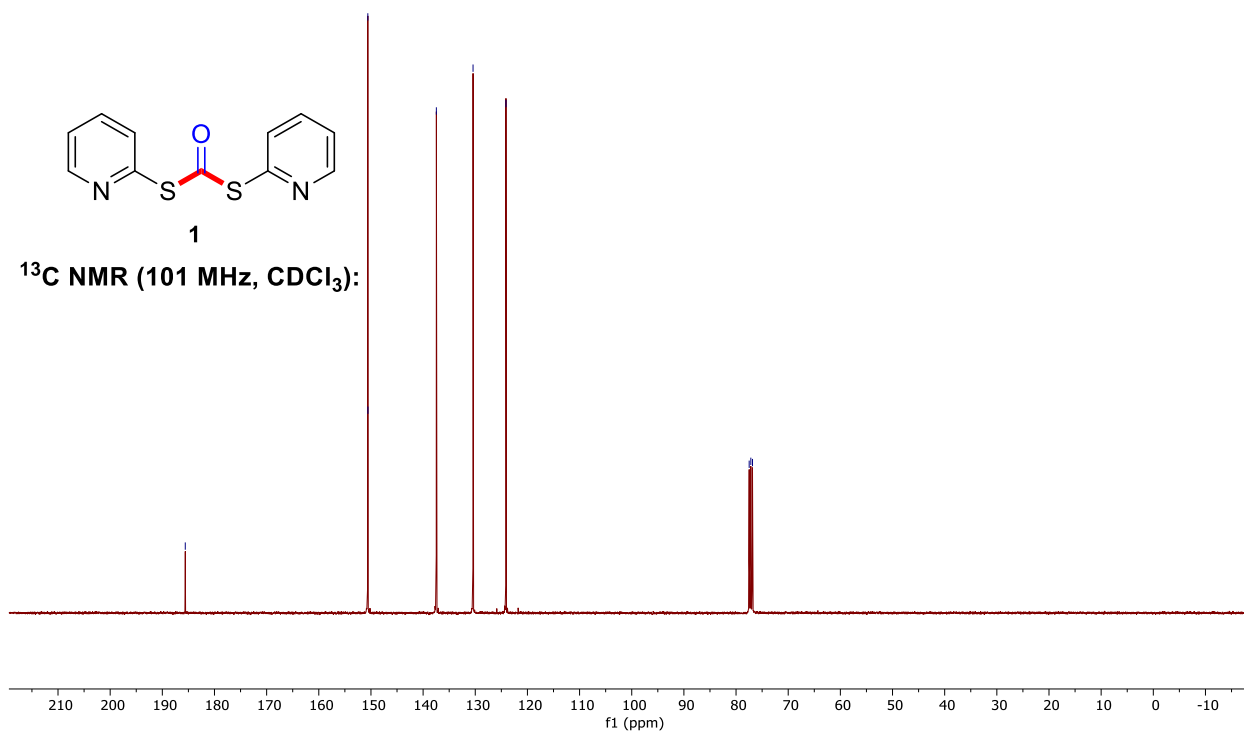

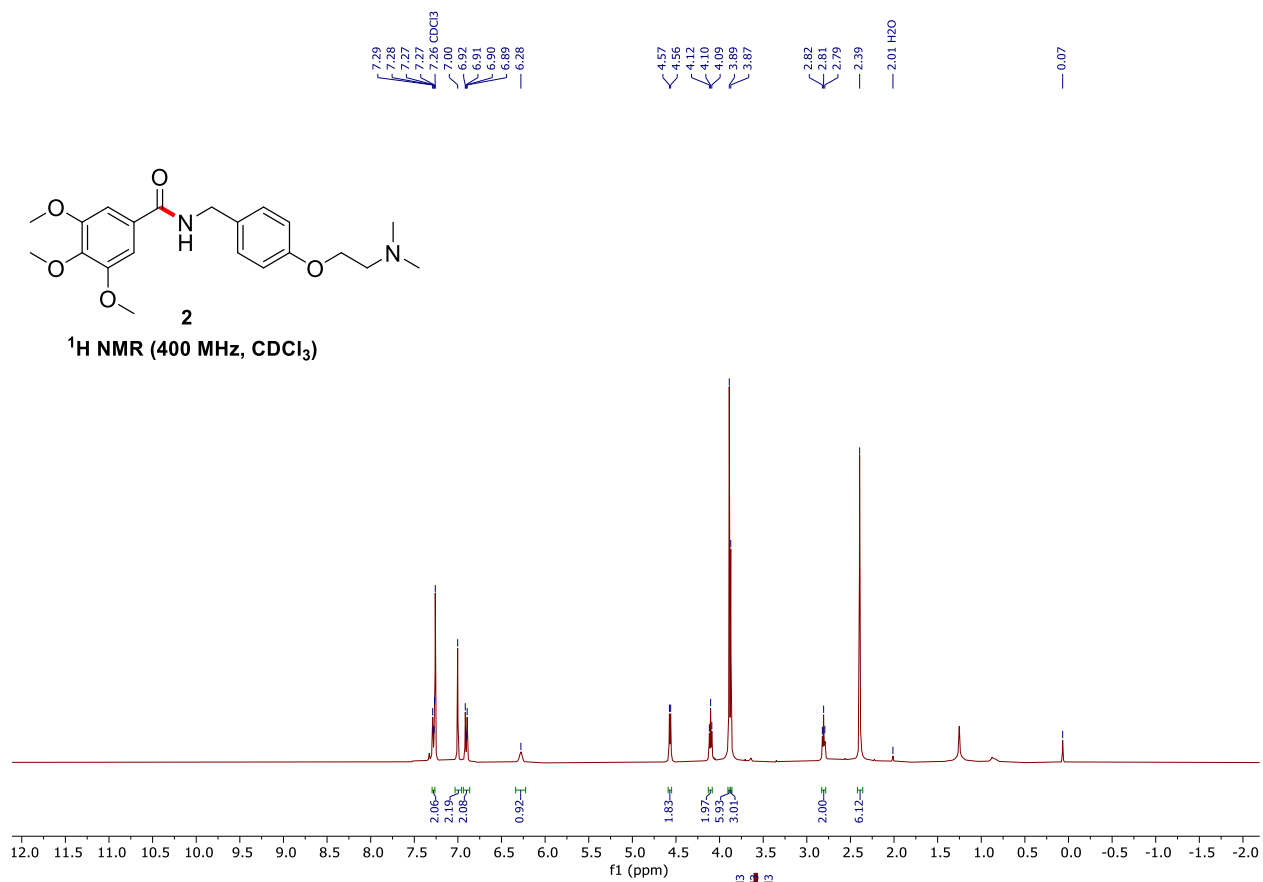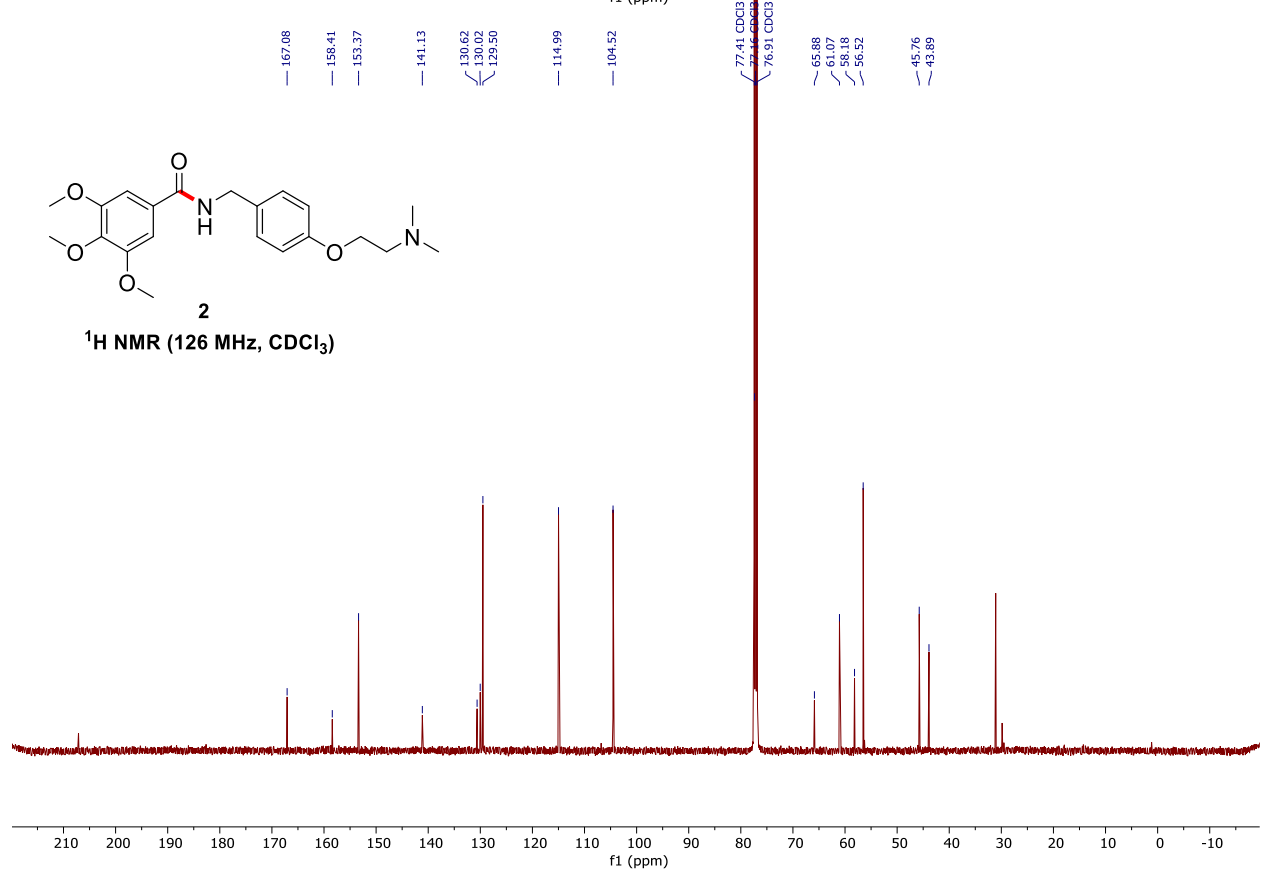

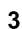

8.41  
8.39  
8.00  
7.99  
7.94  
7.93  
7.92  
7.91  
7.88  
7.78  
7.76  
7.64  
7.62  
7.62  
7.61  
7.61  
7.60  
7.60  
7.59  
7.59  
7.58  
7.57  
7.56  
7.56  
7.55  
7.54  
7.52  
7.29  
7.28  
7.24  
7.23  
2.39  
1.58 H<sub>2</sub>O

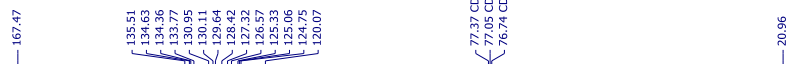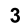

**3**

<sup>13</sup>C NMR (126 MHz, CDCl<sub>3</sub>)

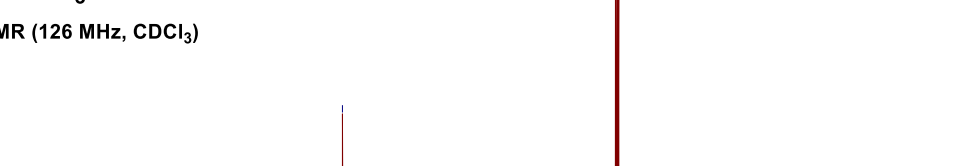

Chemical structure of **3**: CC(=O)C1=CC=CC=C1

<sup>13</sup>C NMR (126 MHz, CDCl<sub>3</sub>) spectrum showing peaks at approximately 168 ppm (C=O), 133 ppm (aromatic C), 131 ppm (aromatic C), 129 ppm (aromatic C), 128 ppm (aromatic C), 127 ppm (aromatic C), 126 ppm (aromatic C), 125 ppm (aromatic C), 124 ppm (aromatic C), 123 ppm (aromatic C), 122 ppm (aromatic C), 121 ppm (aromatic C), 120 ppm (aromatic C), 77 ppm (CDCl<sub>3</sub> solvent triplet), and 21 ppm (CH<sub>3</sub>).

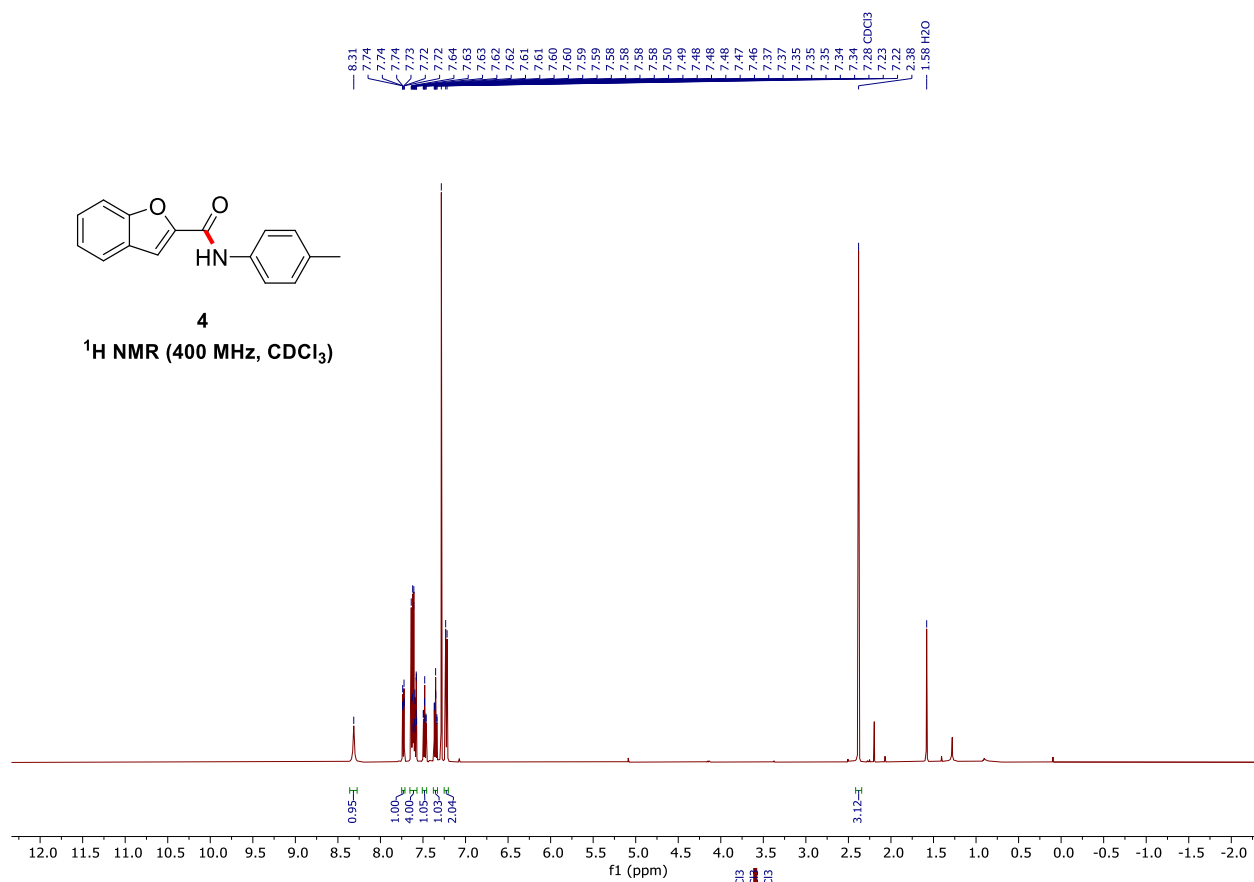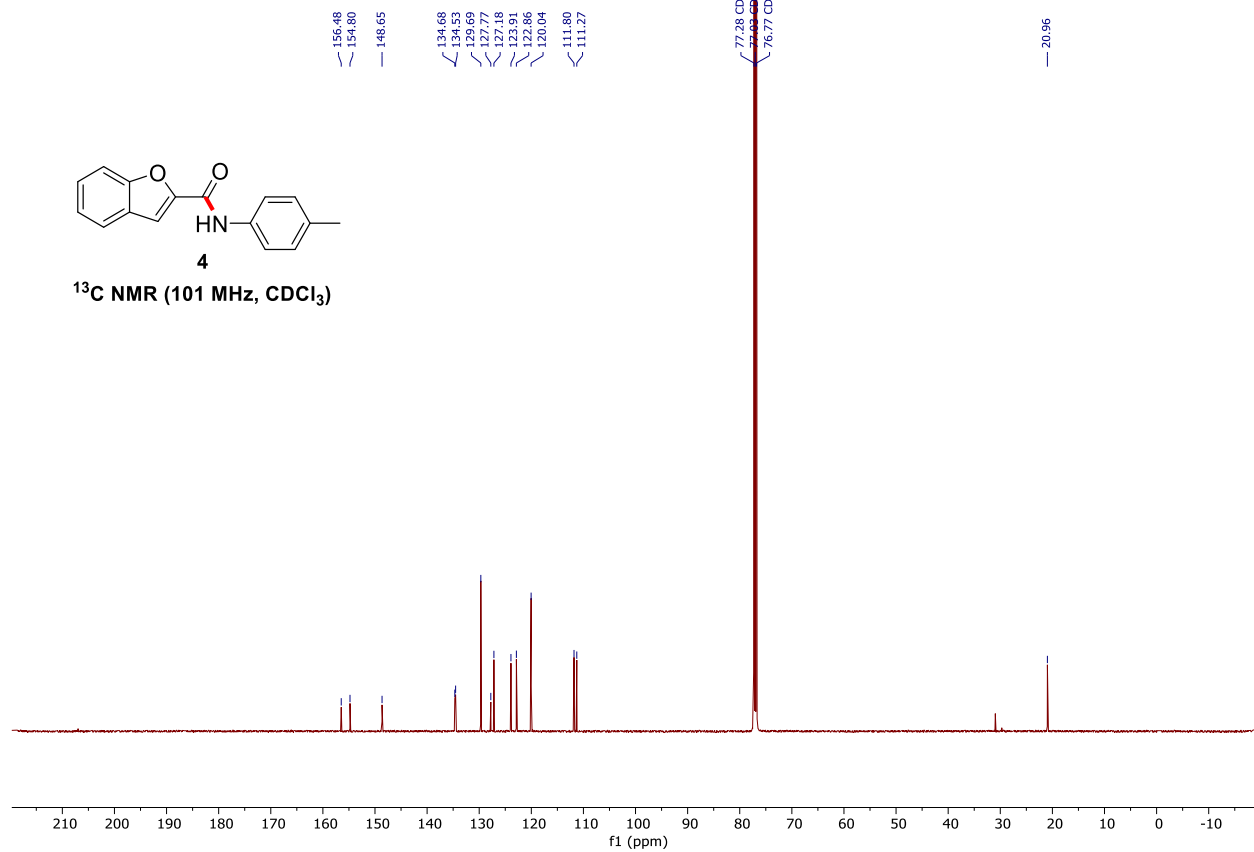

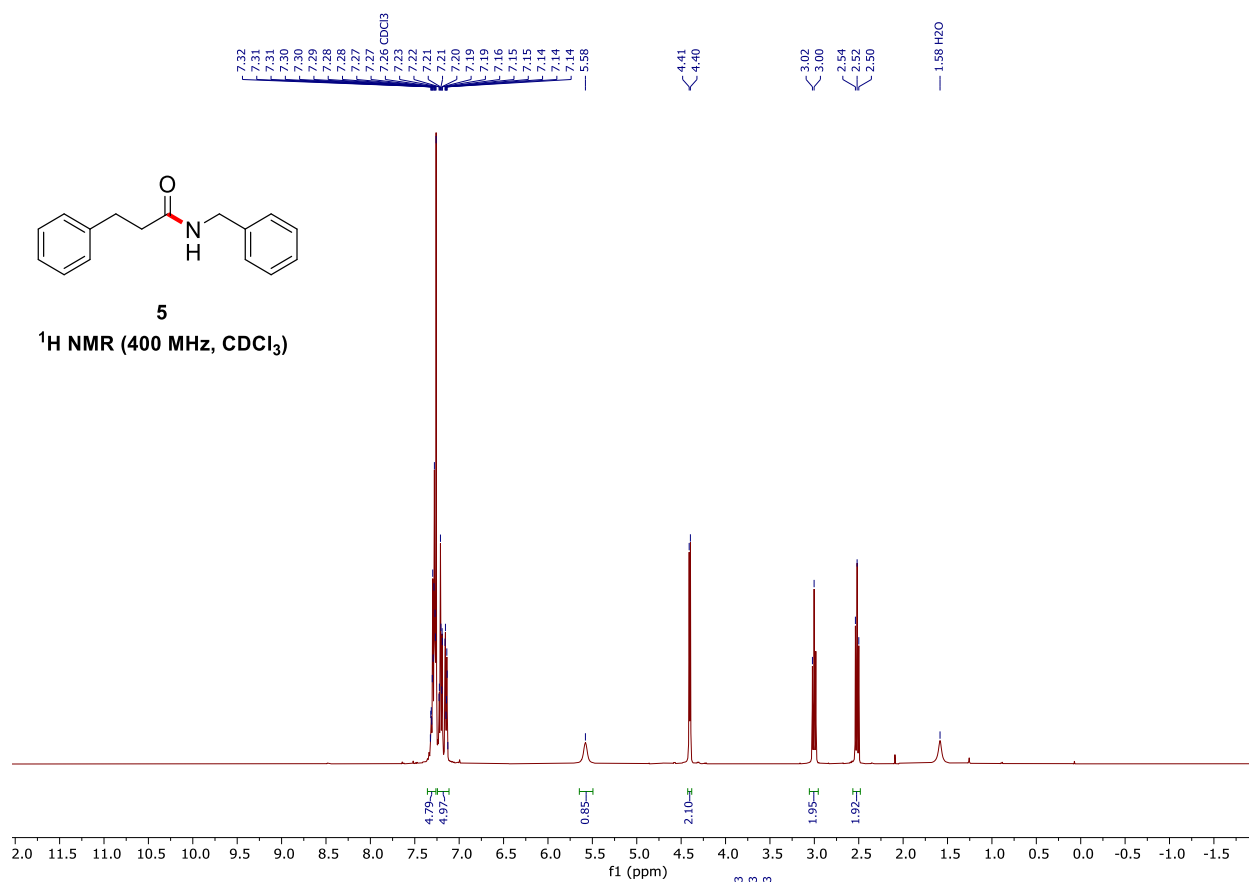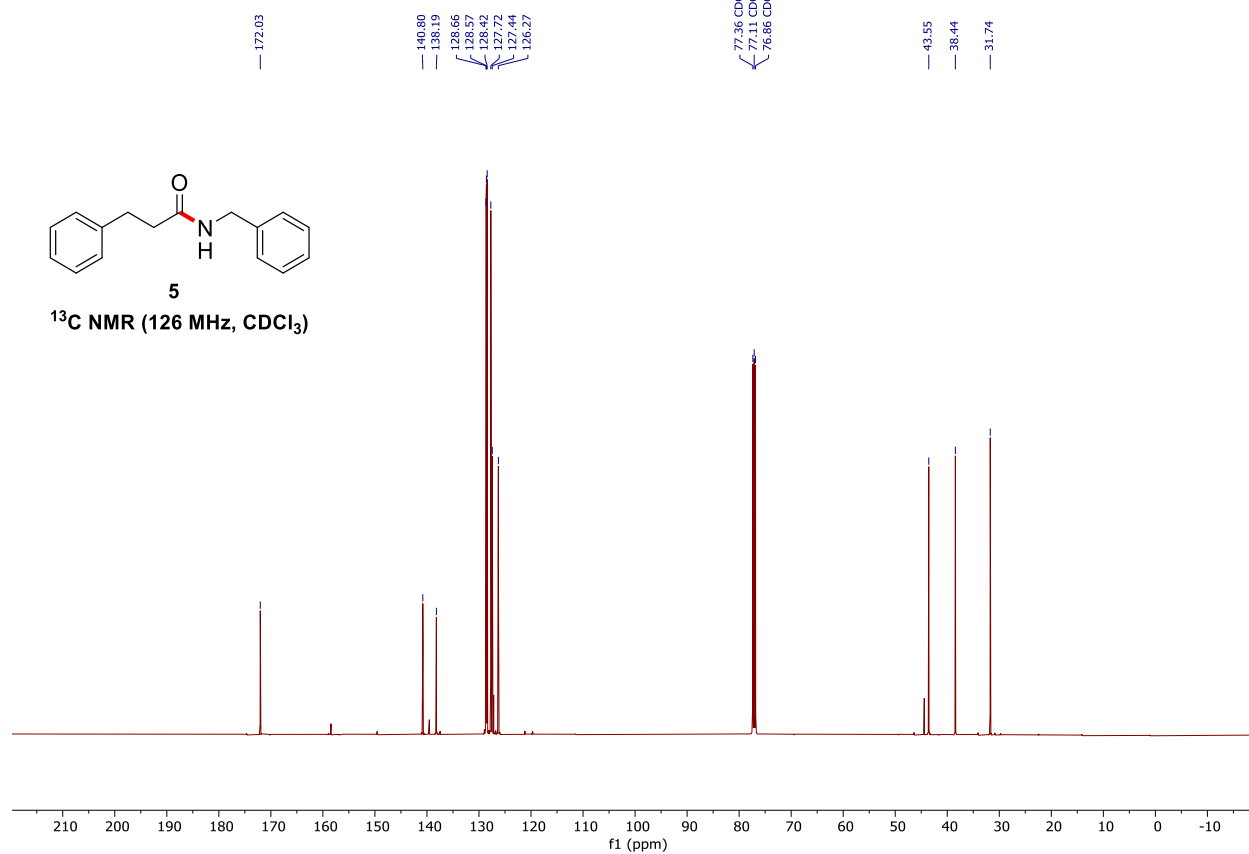

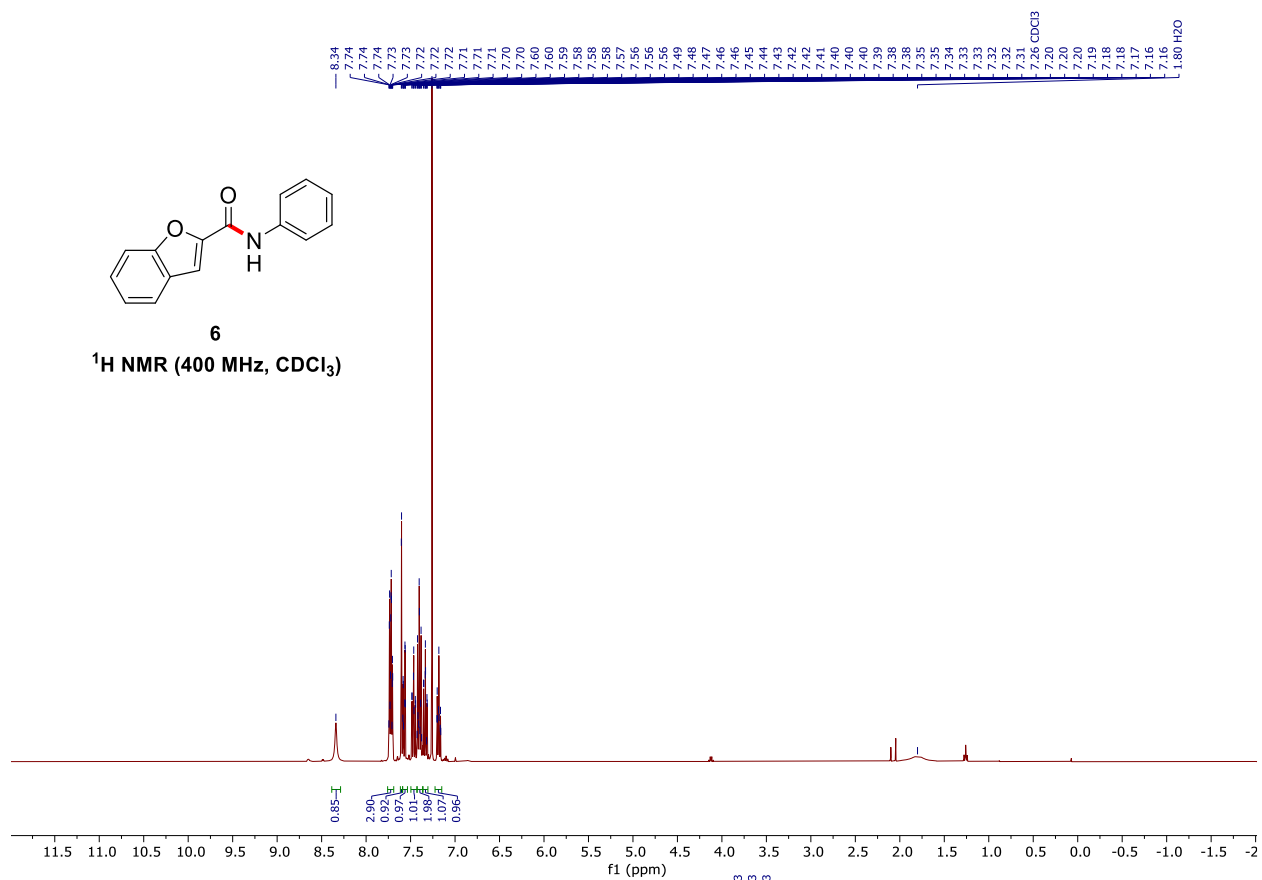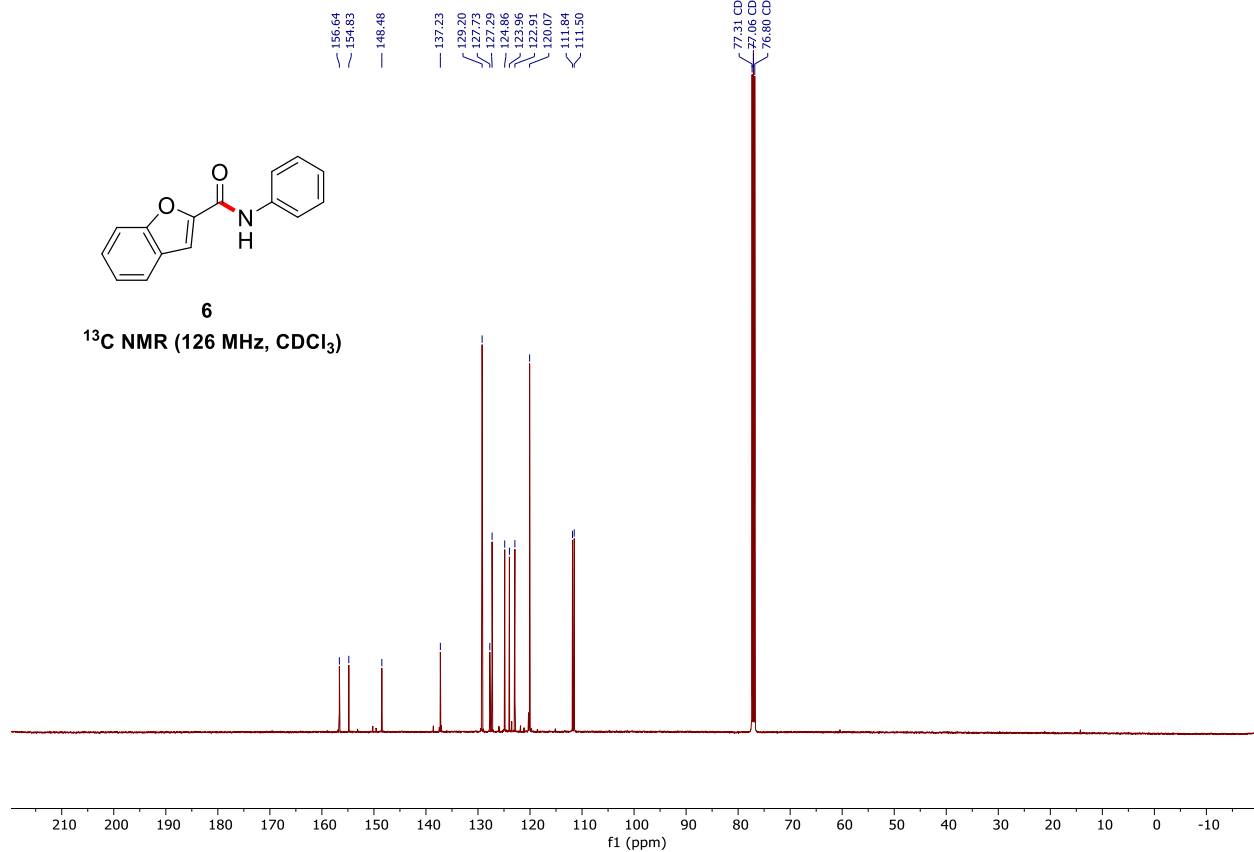

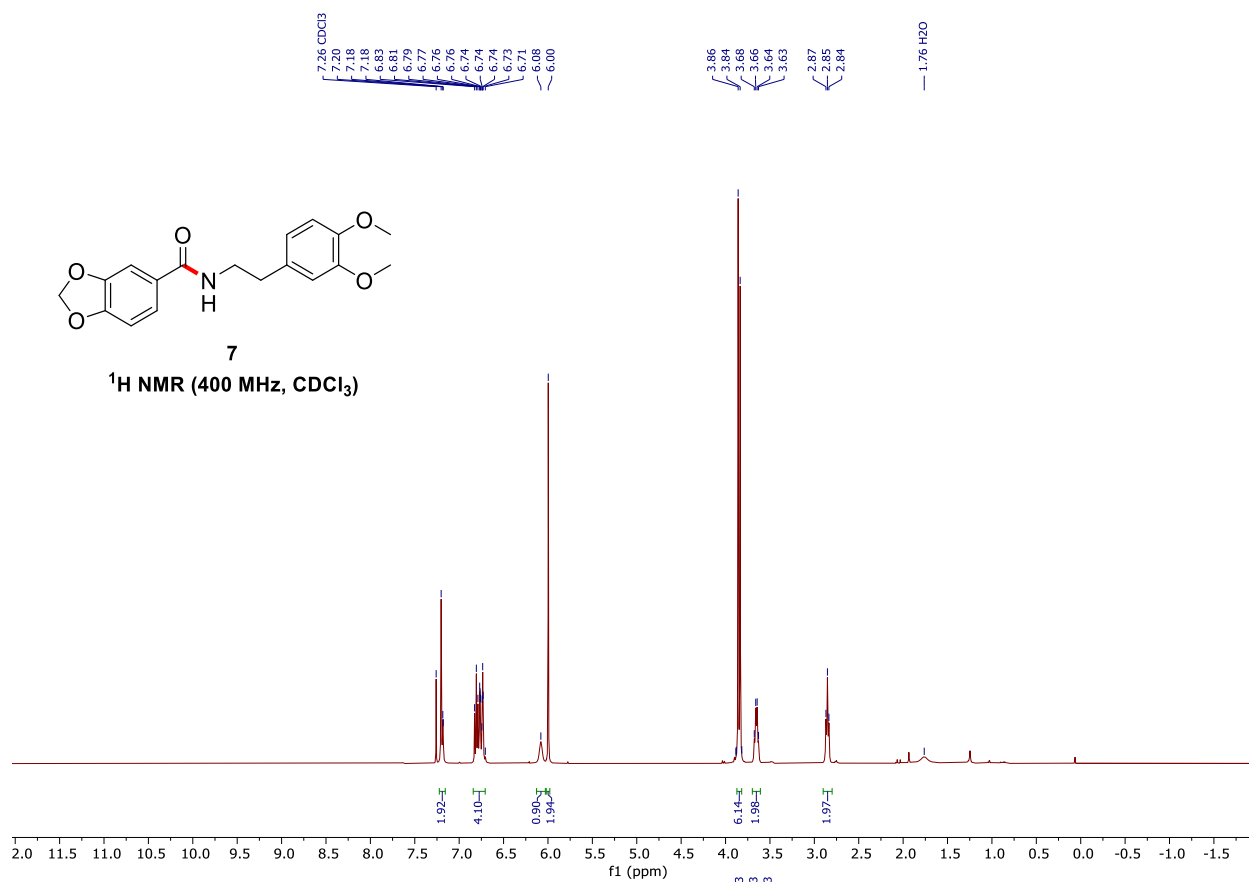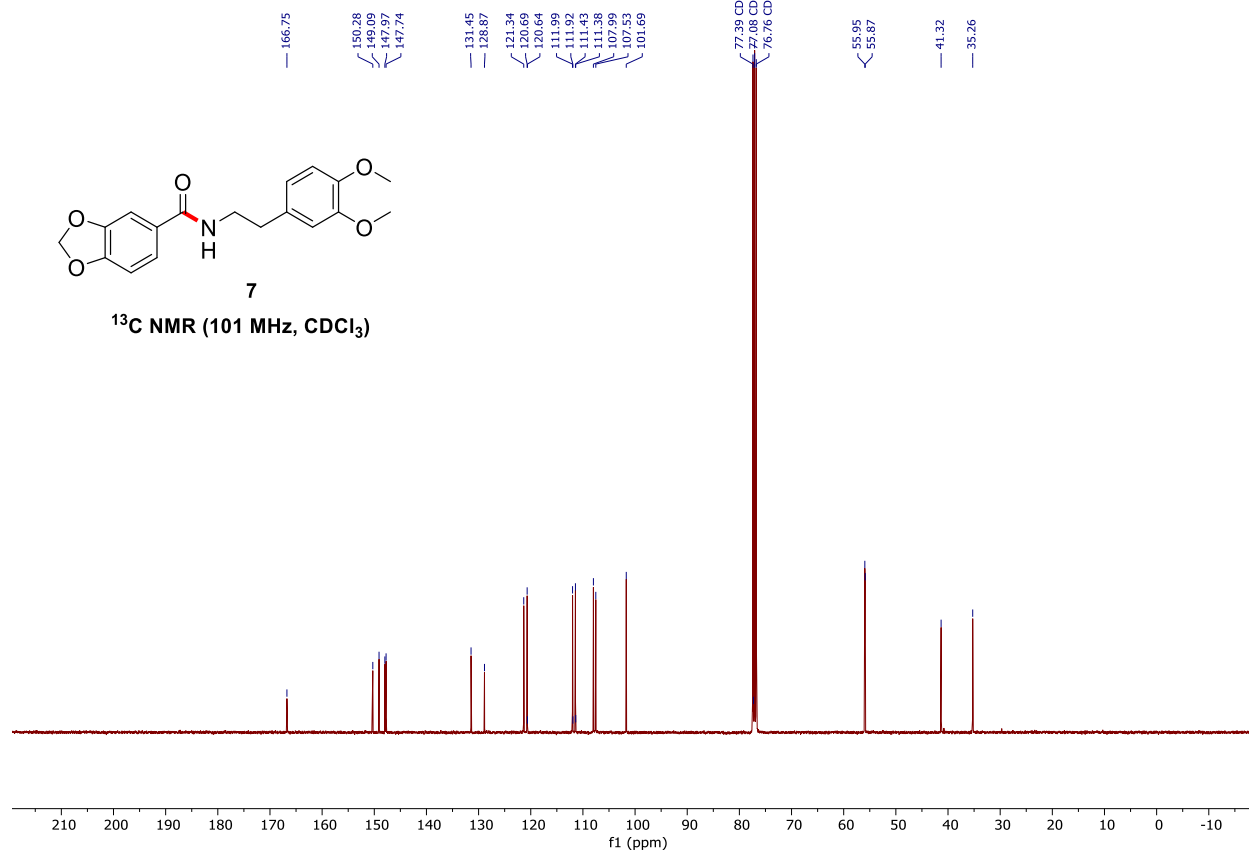

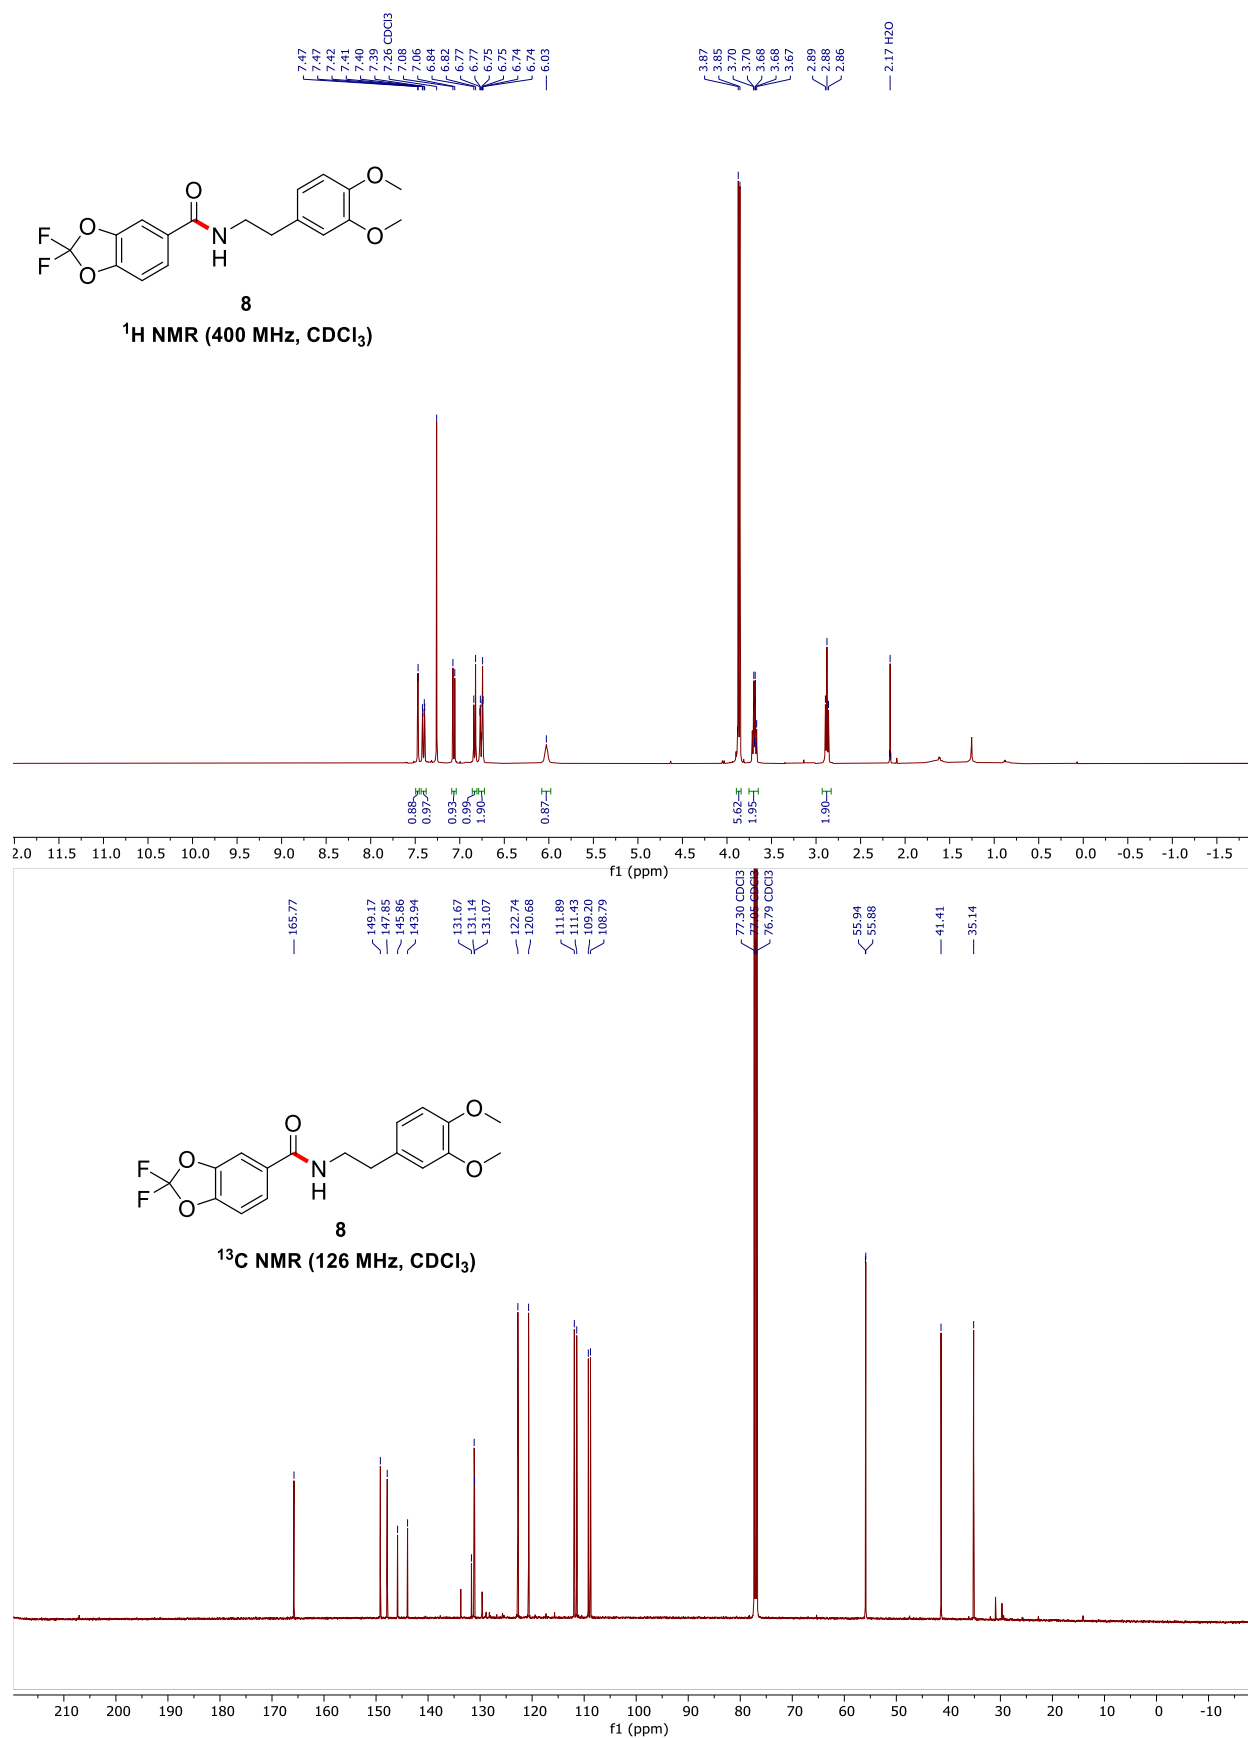

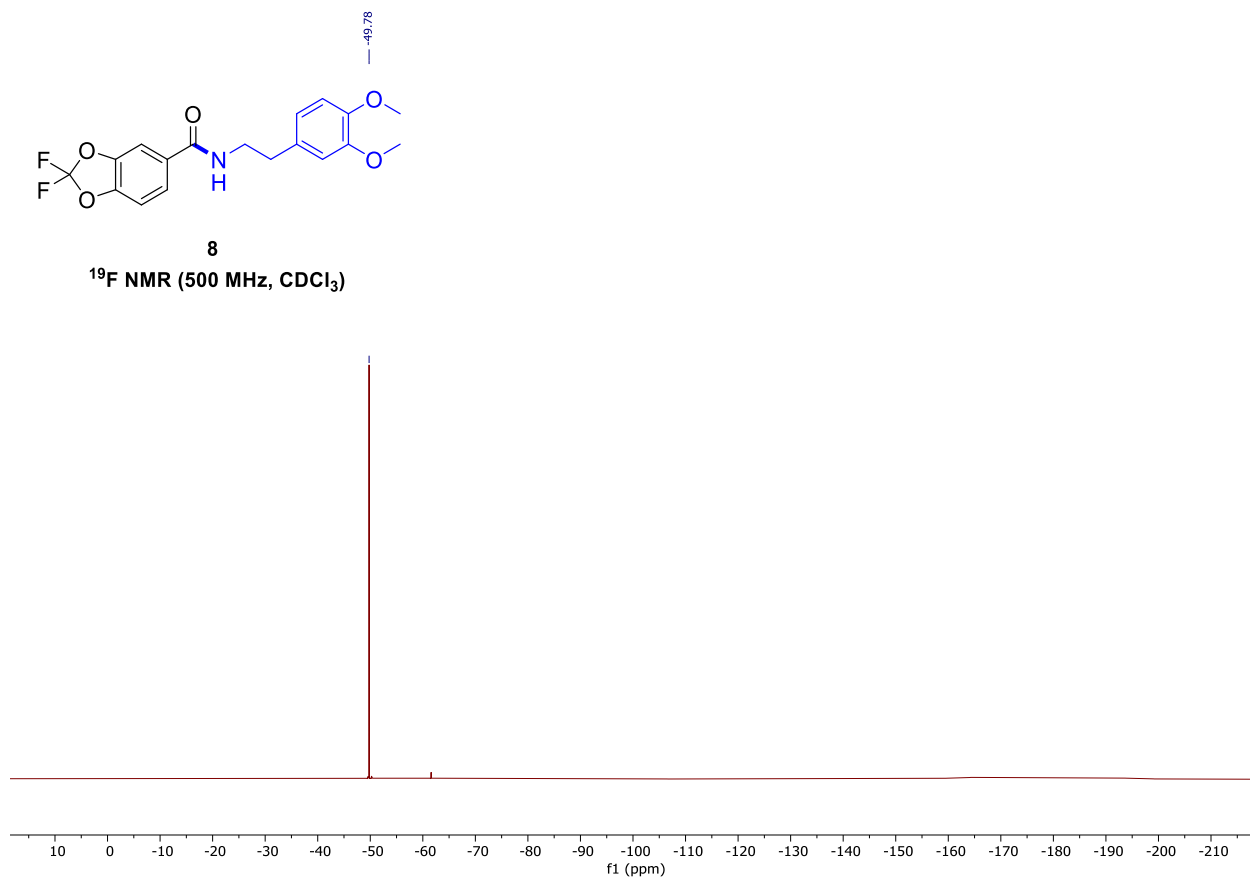

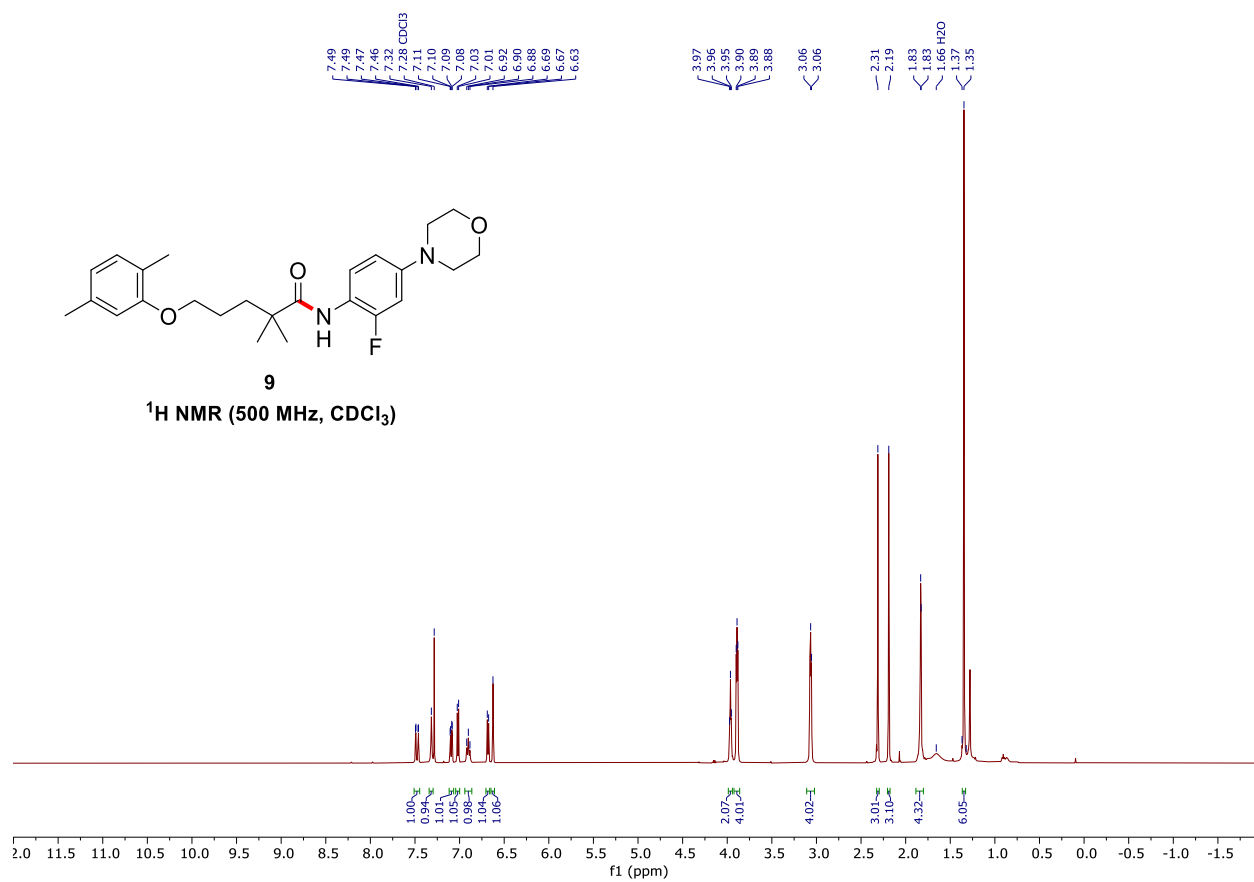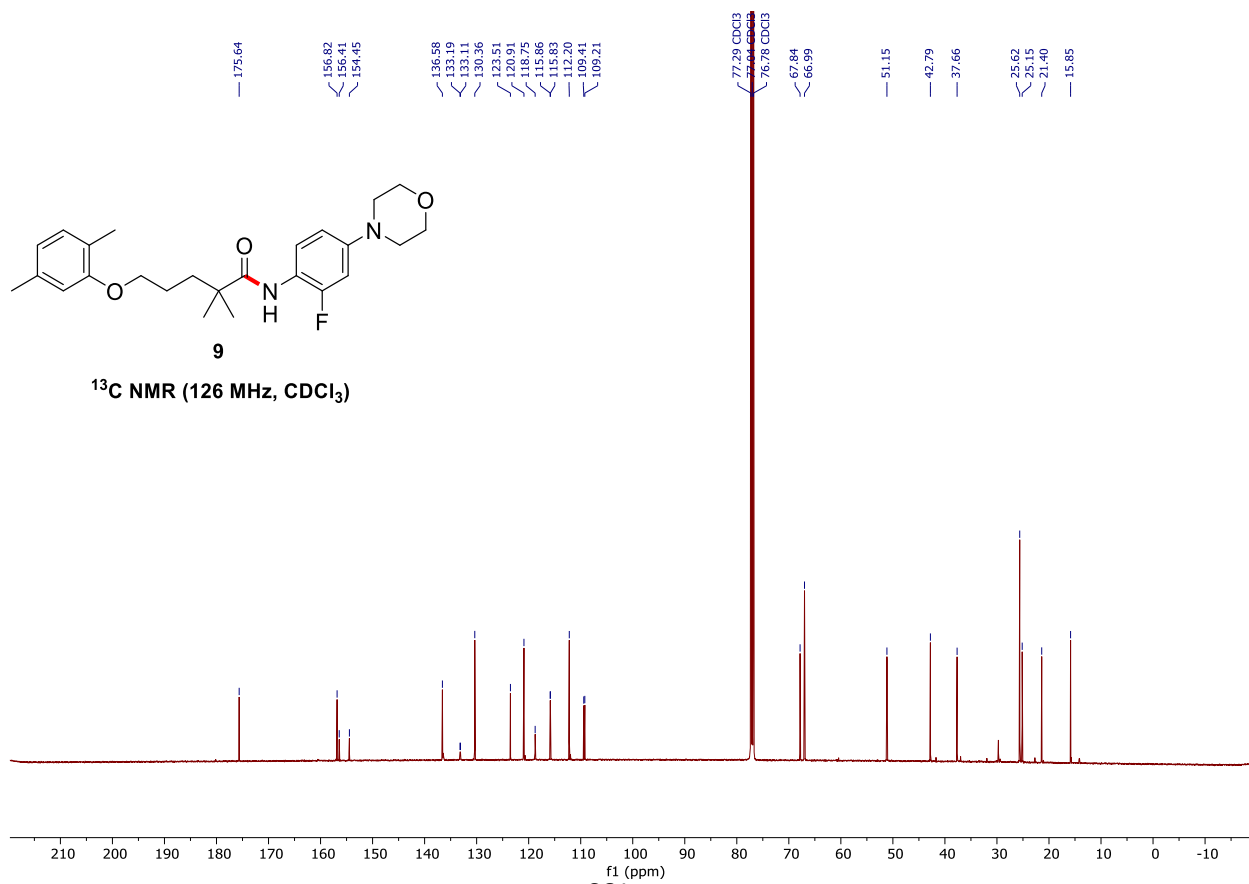

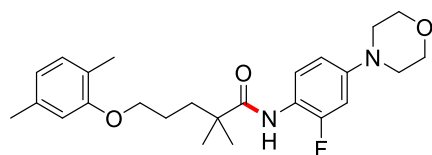

9

$^{19}\text{F}$  NMR (500 MHz,  $\text{CDCl}_3$ )

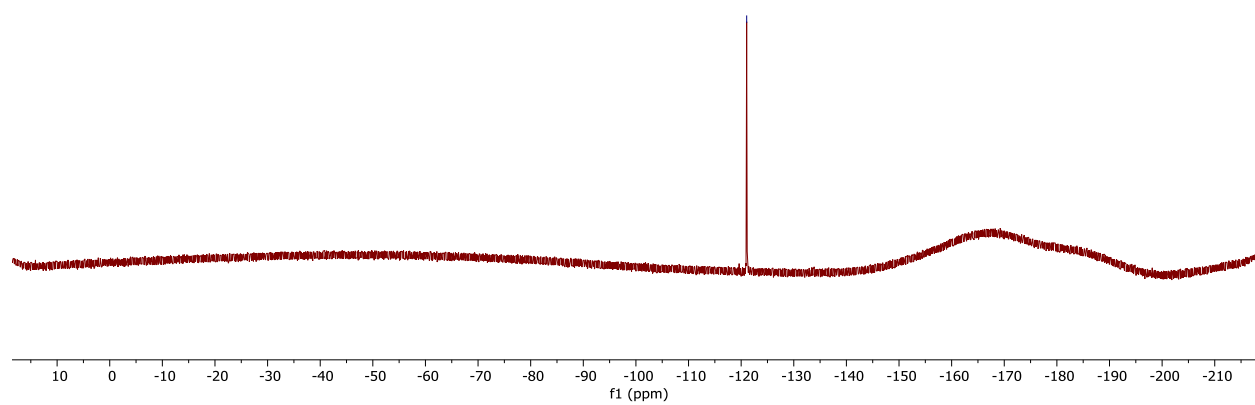

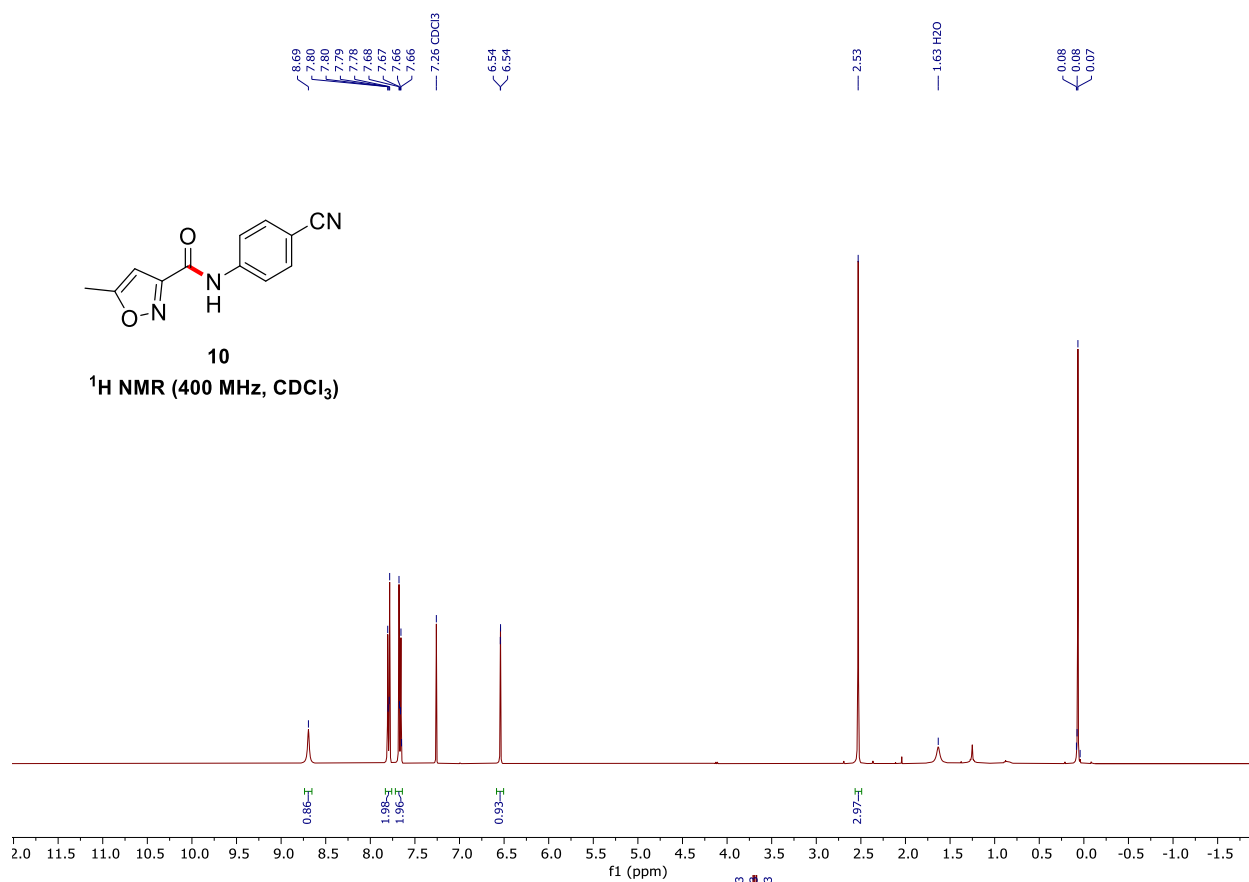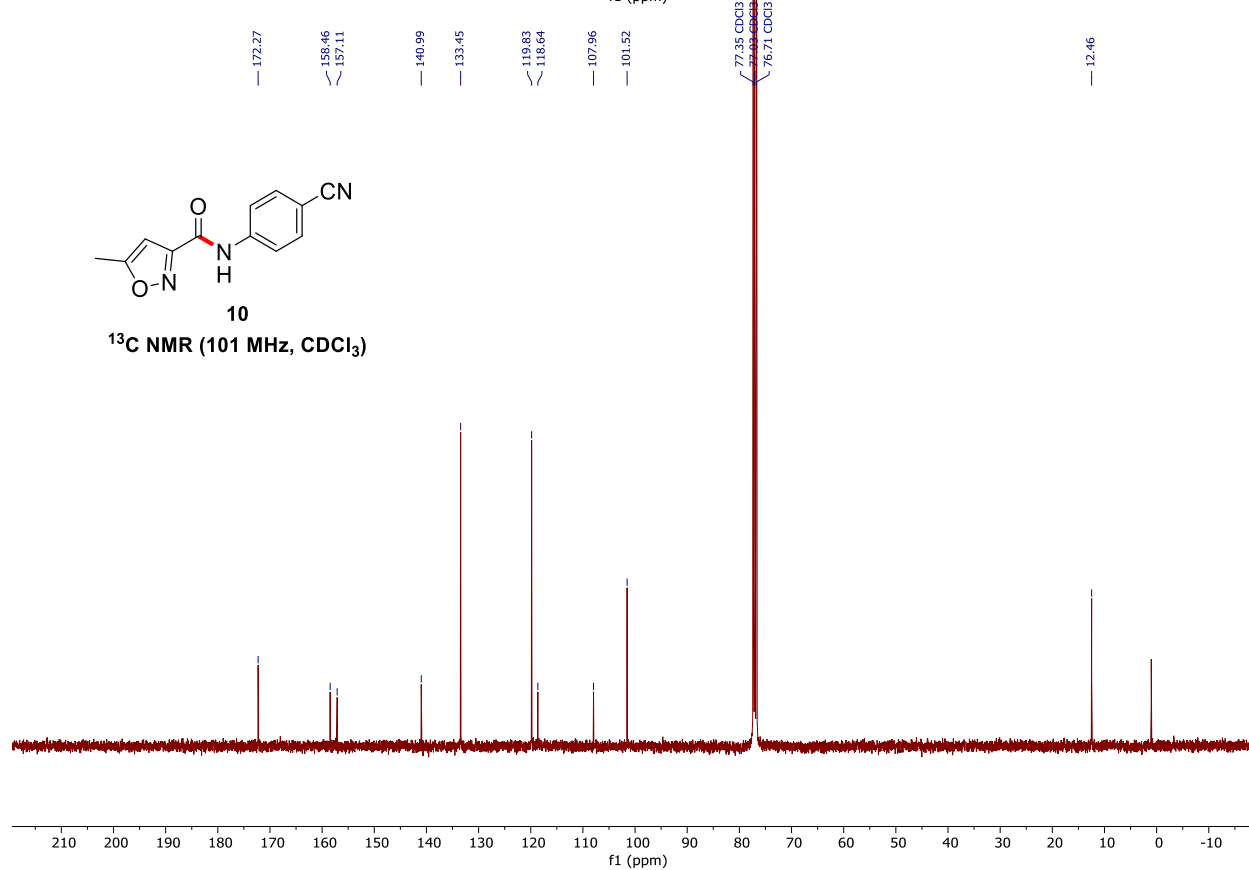

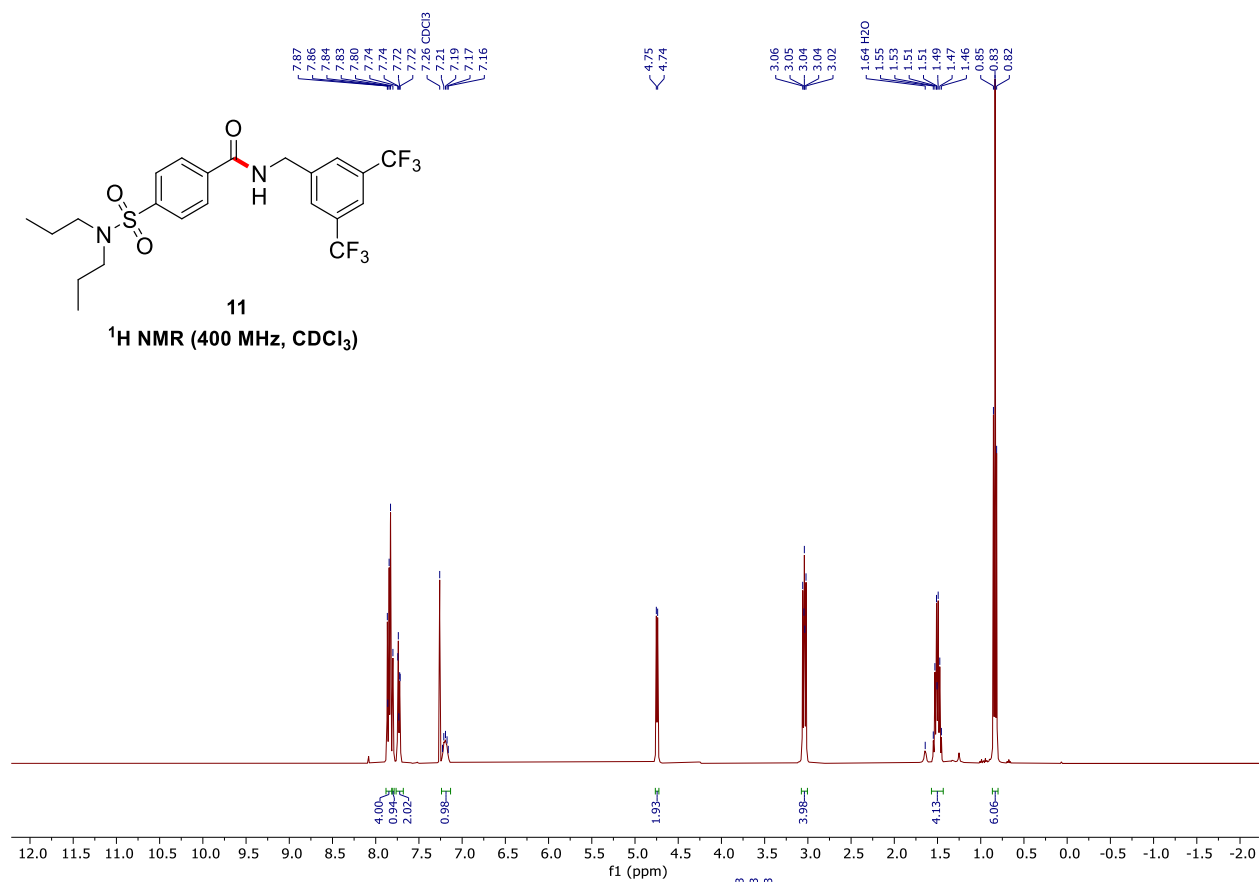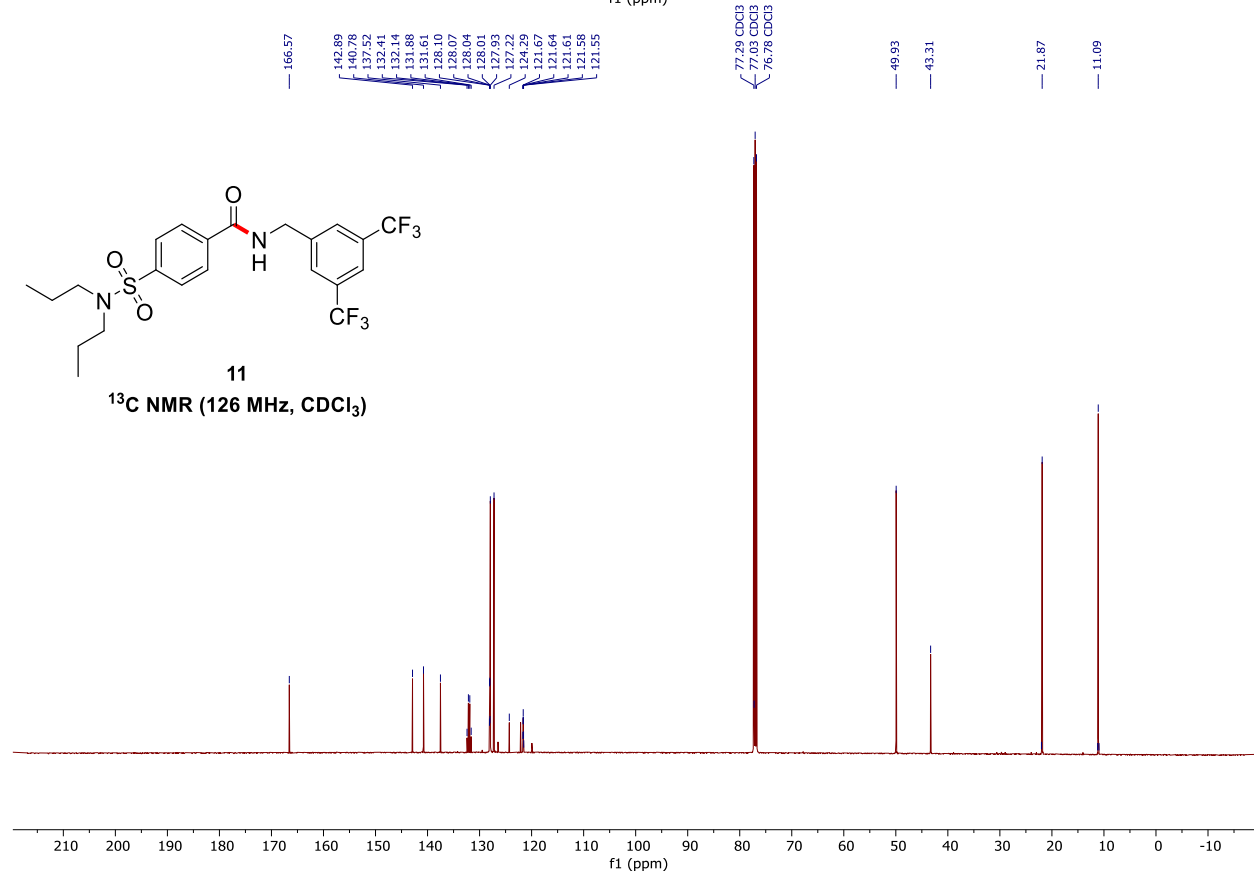

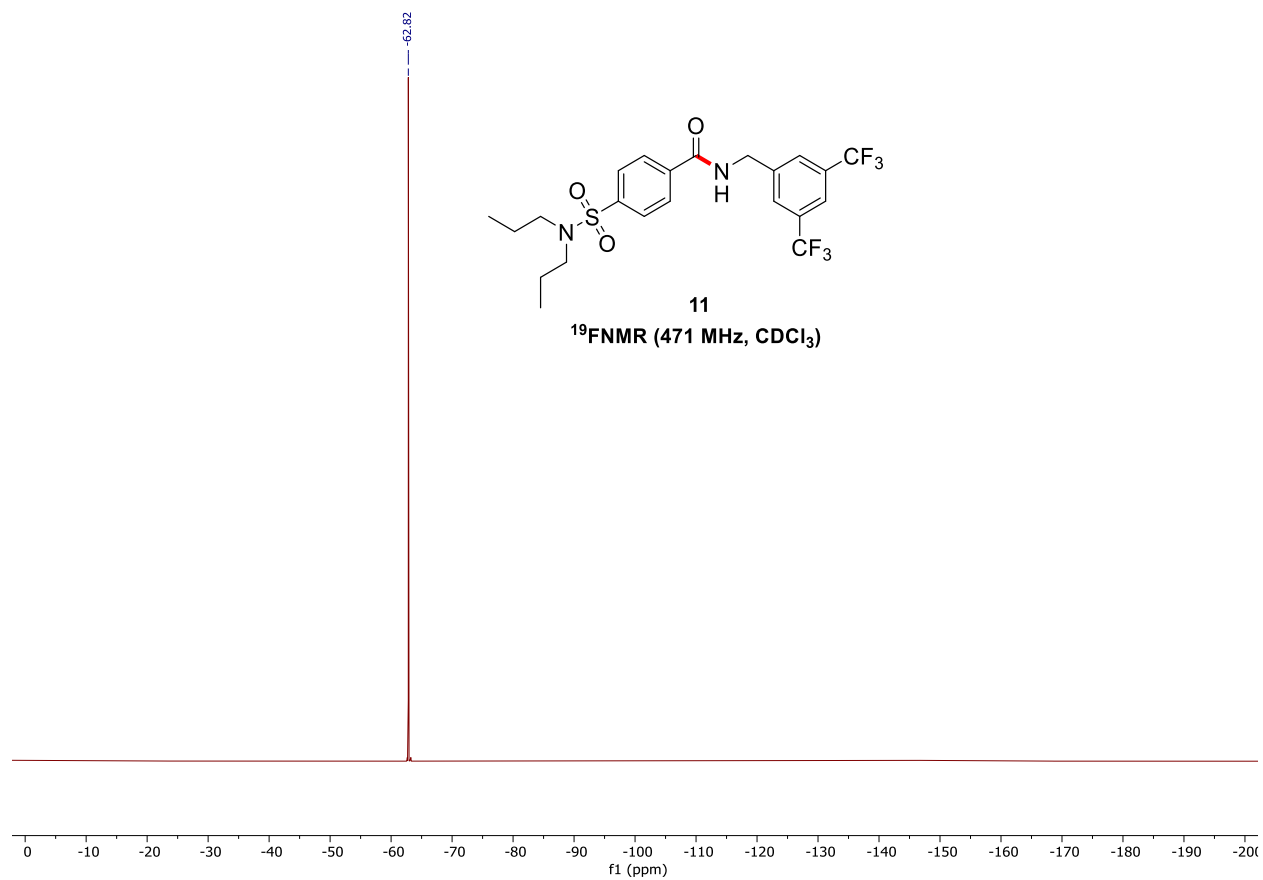

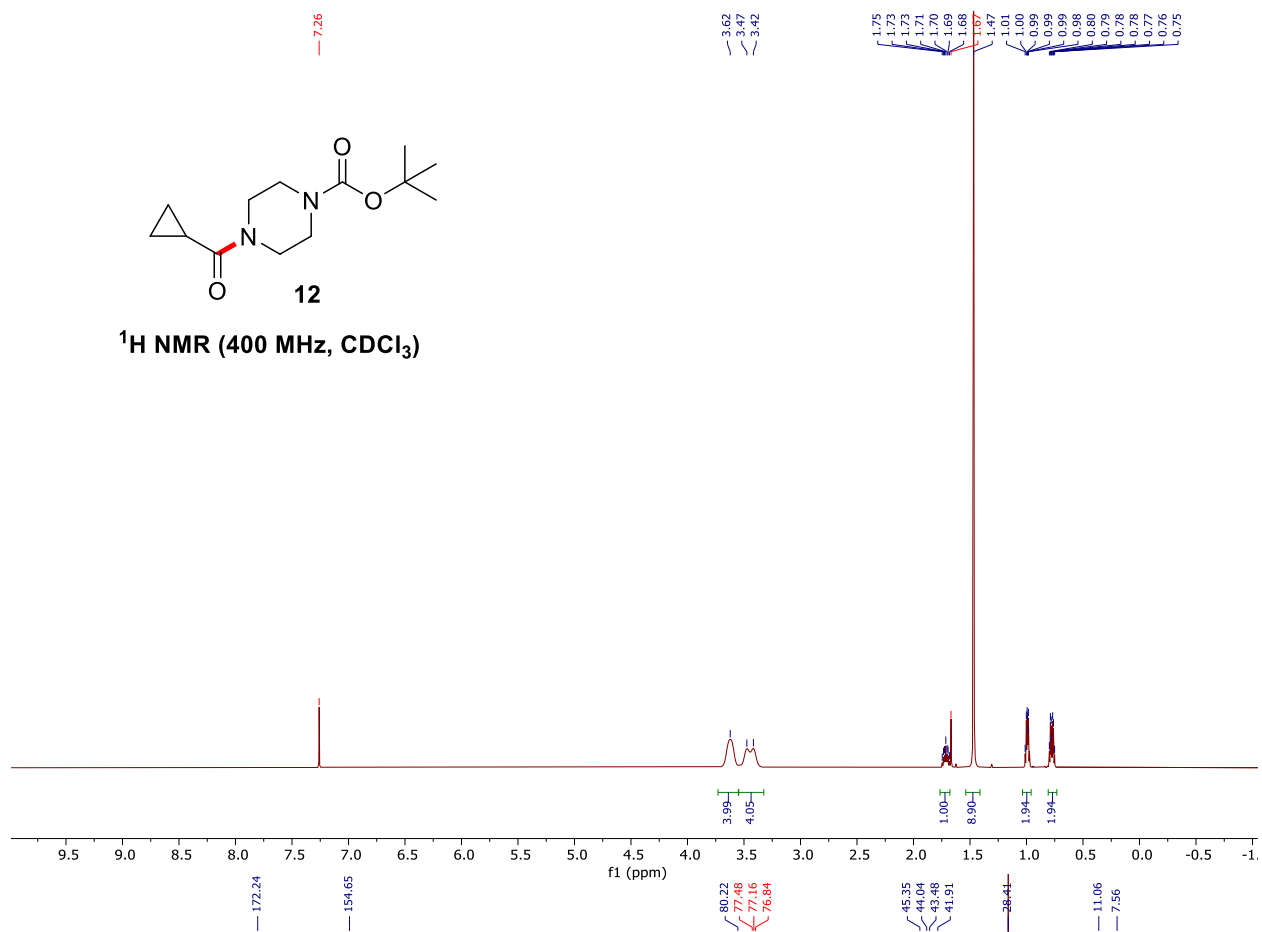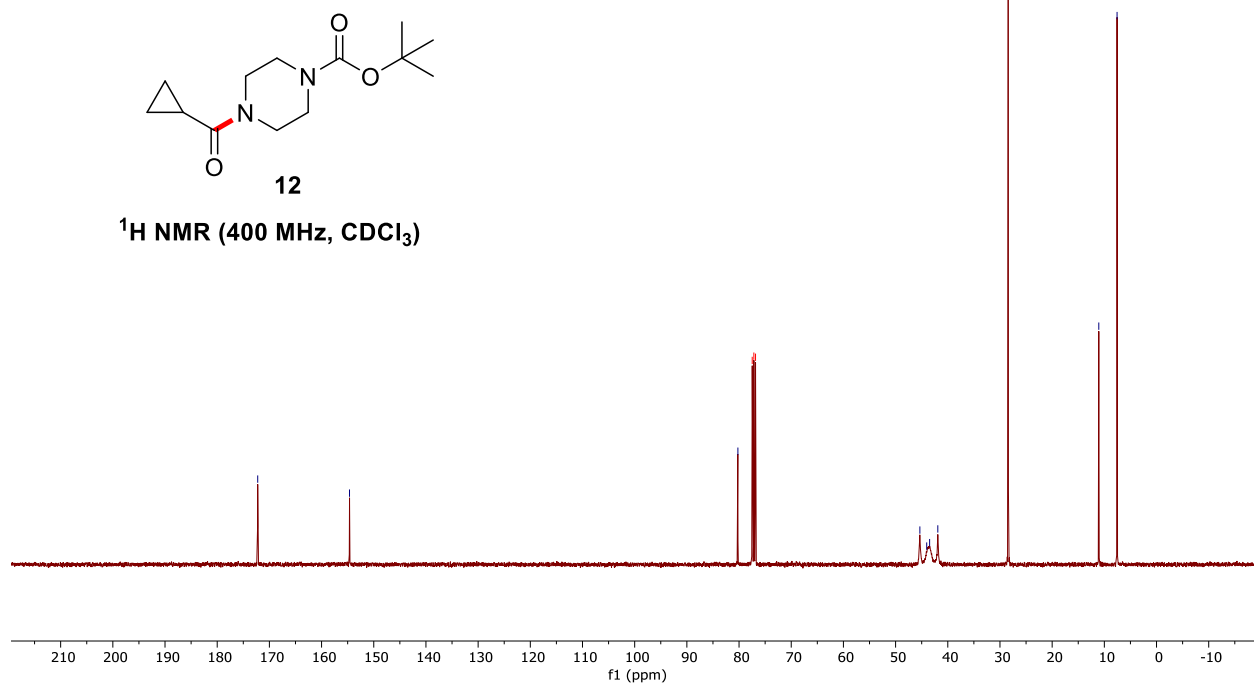

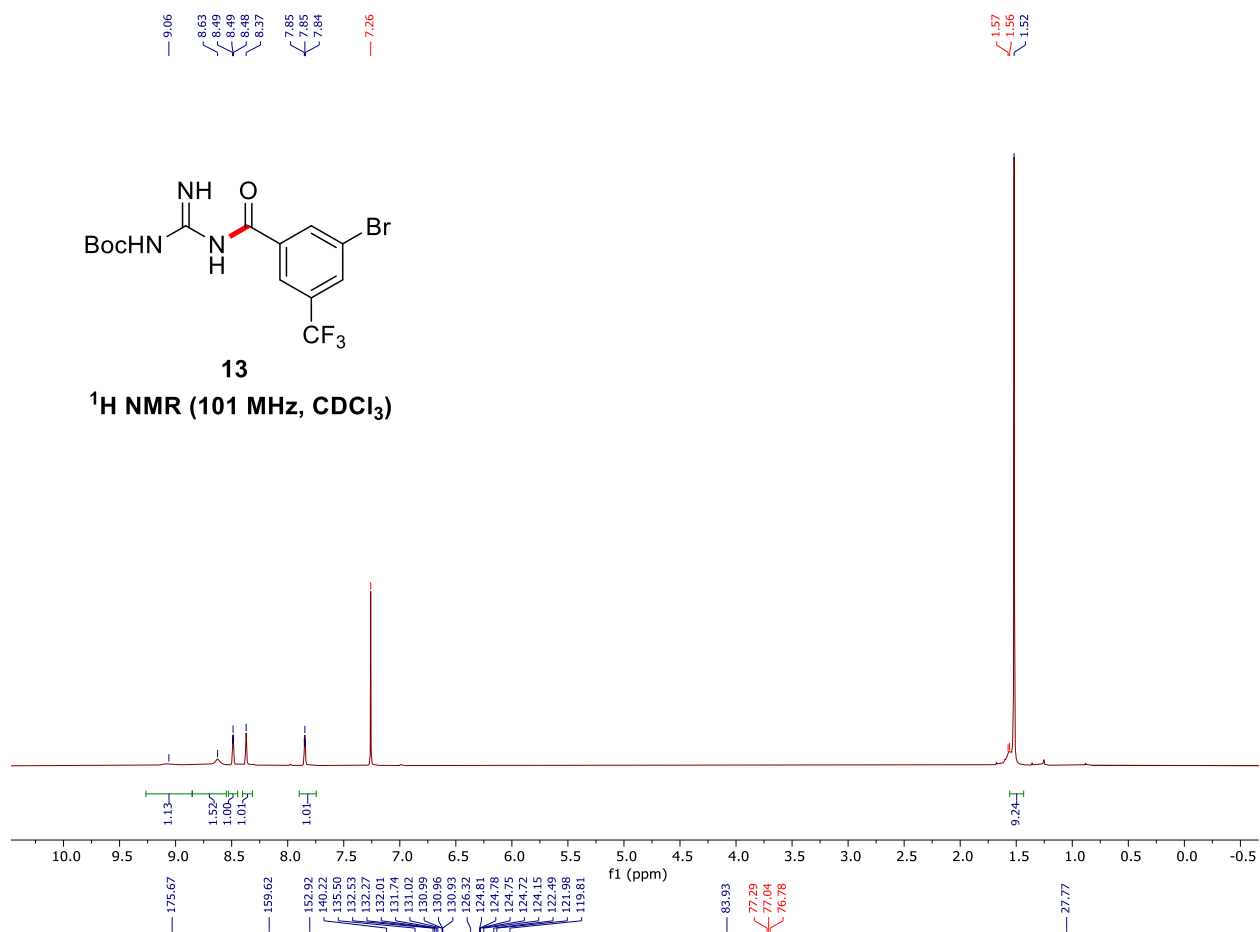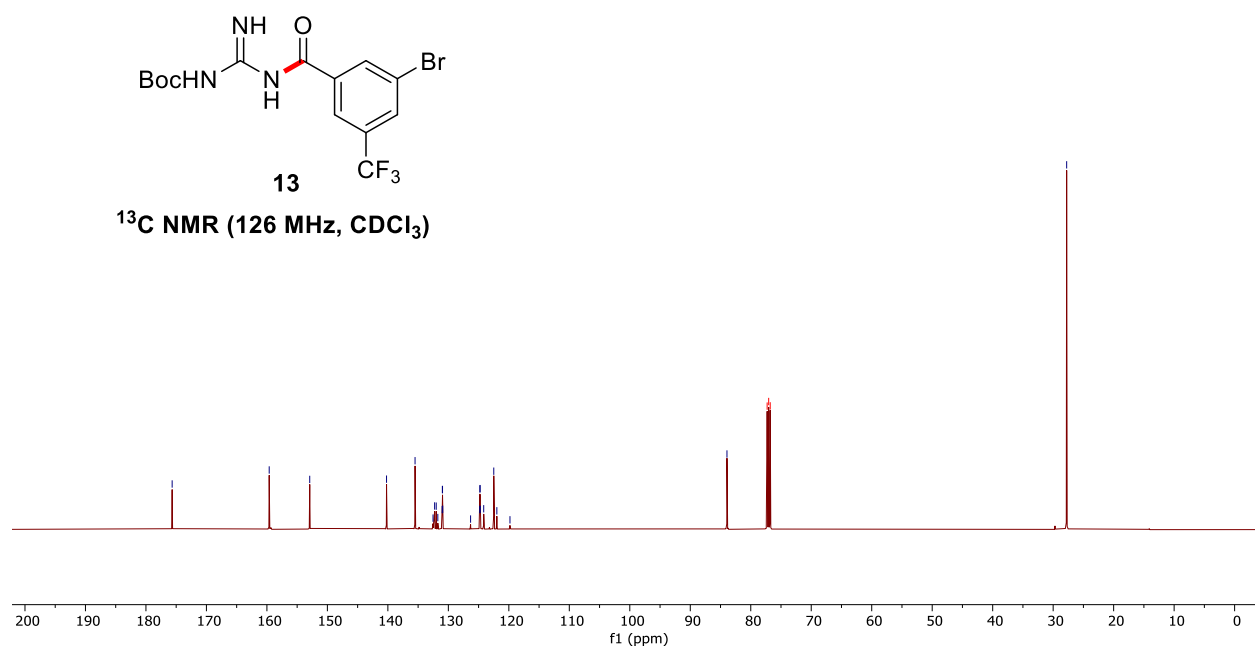

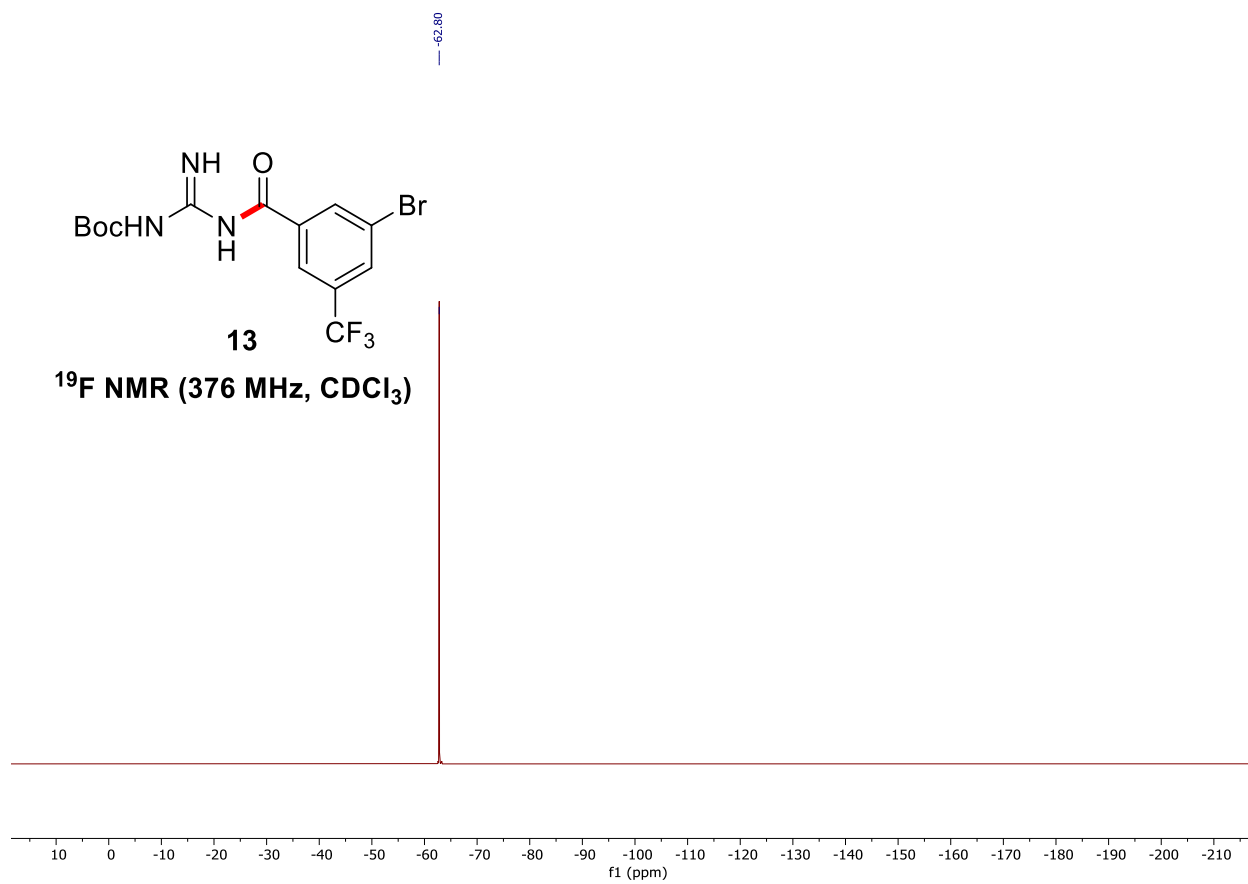

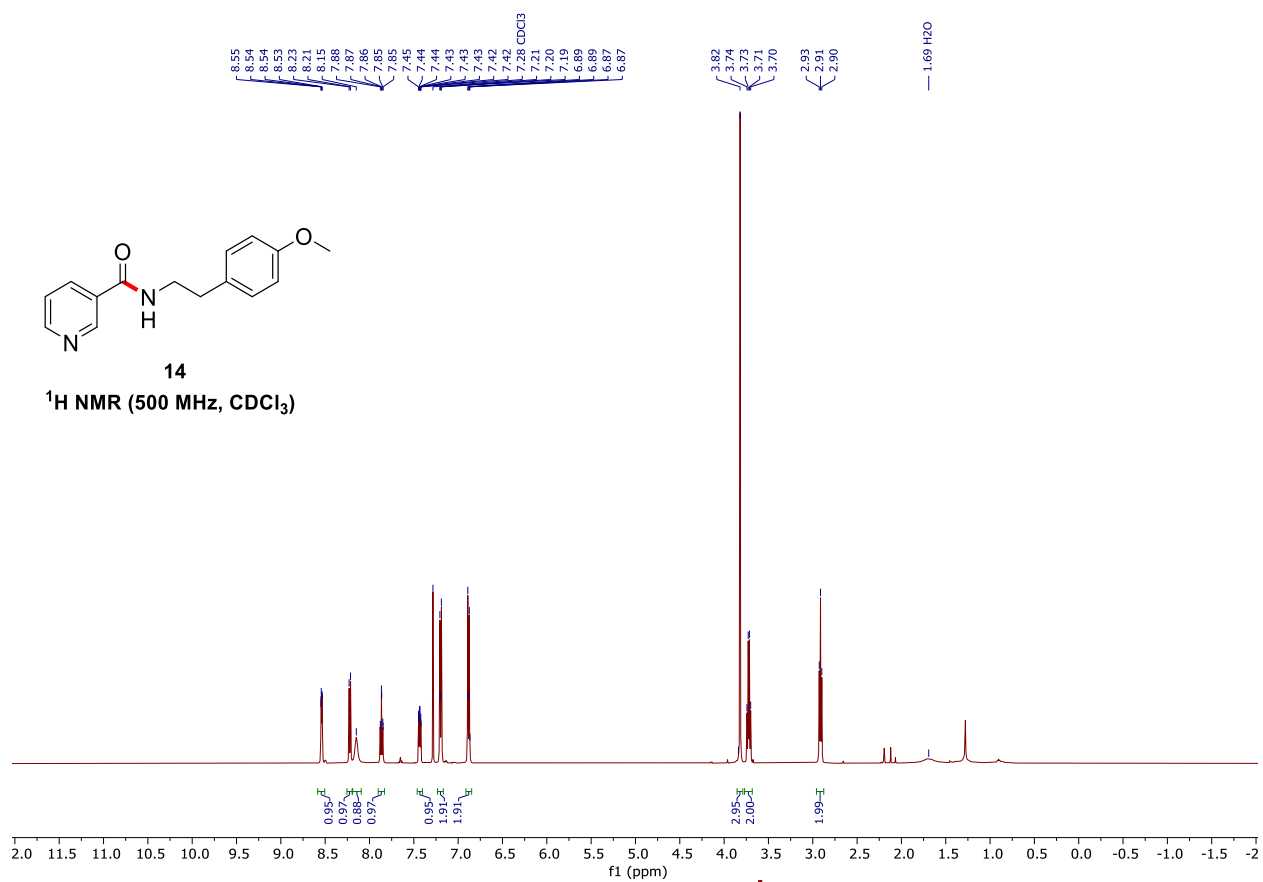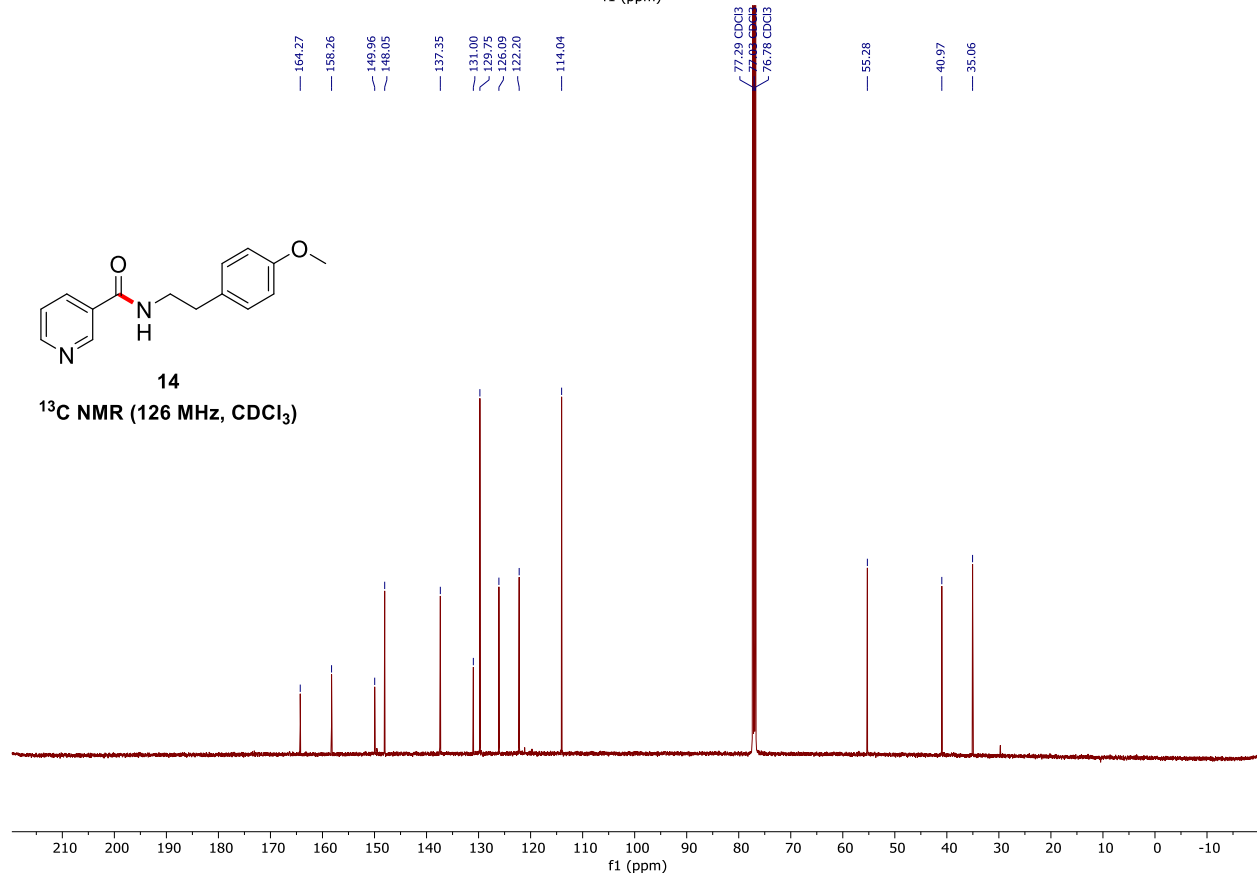

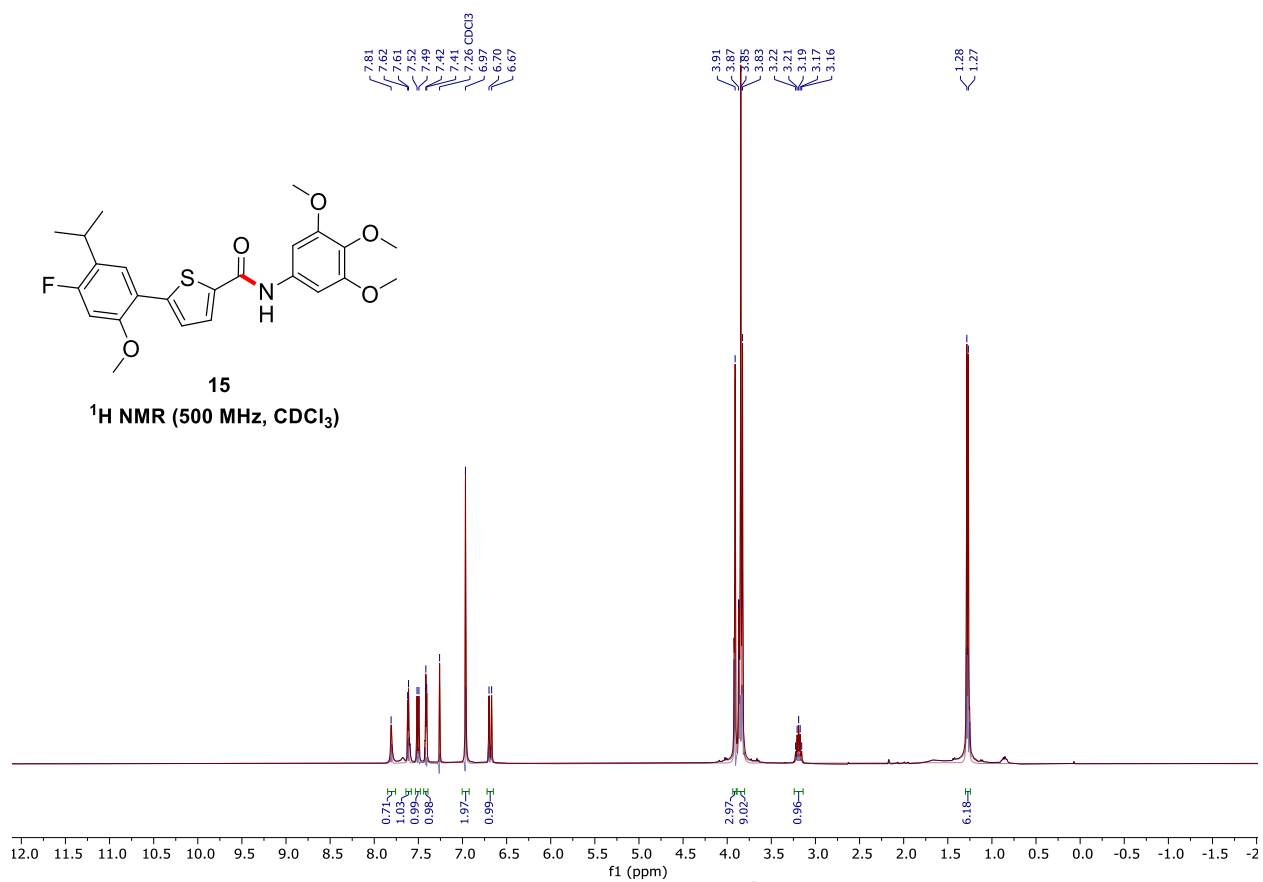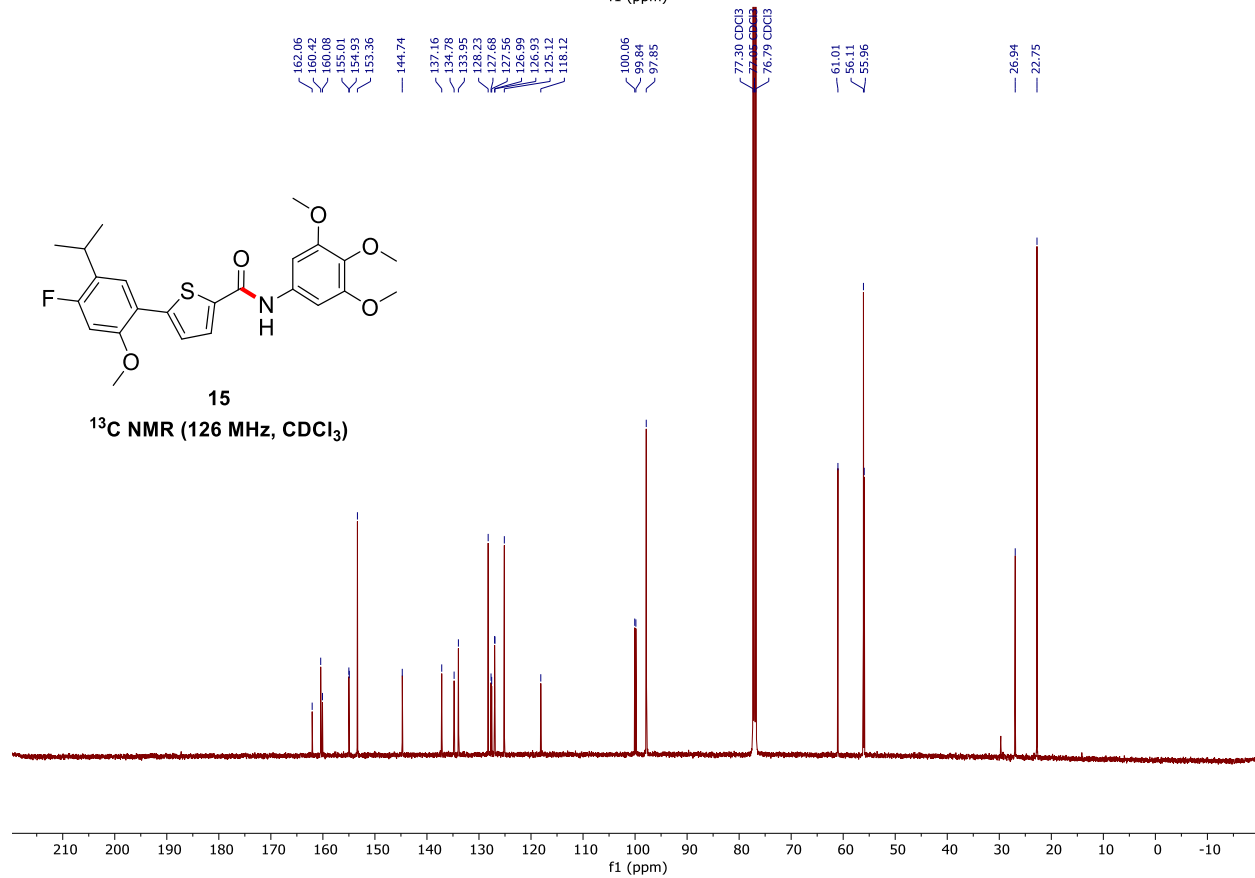

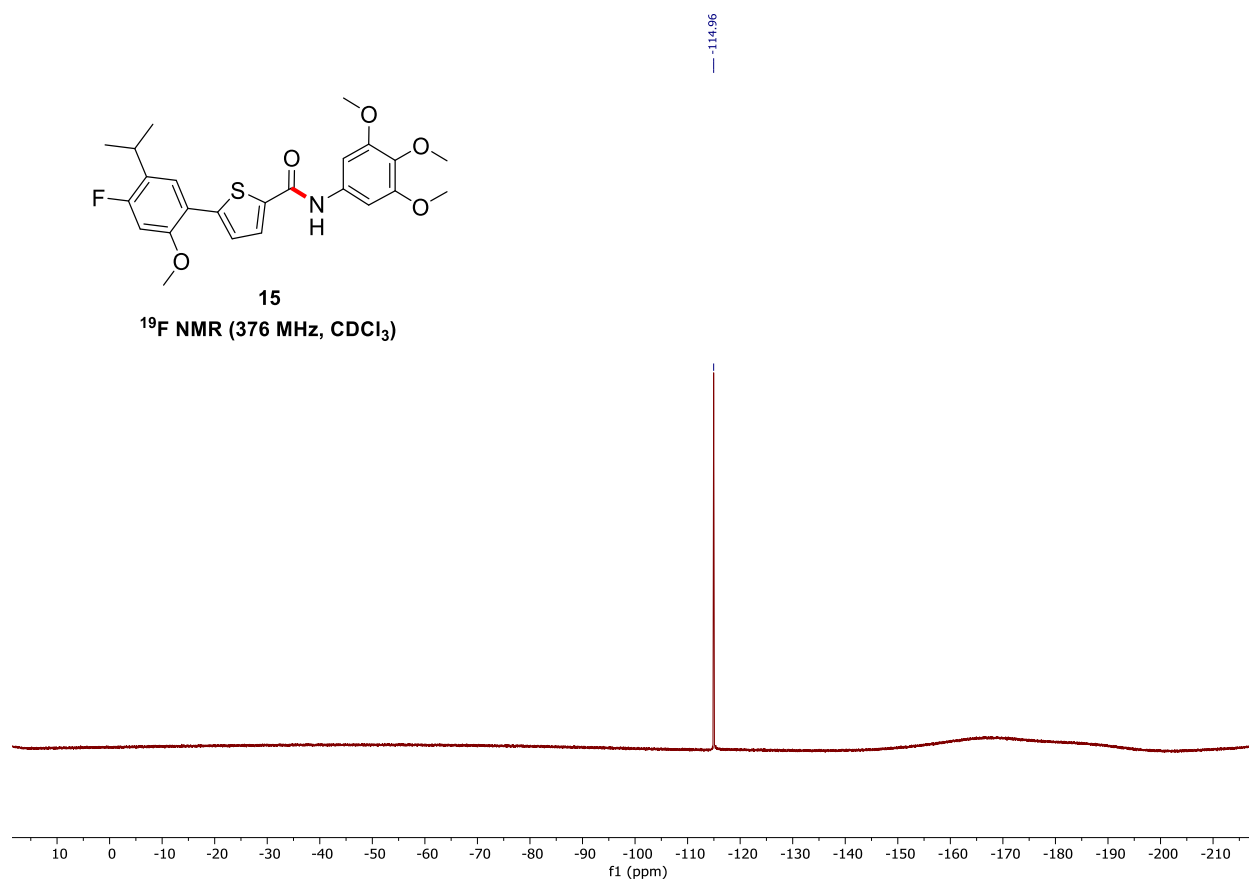

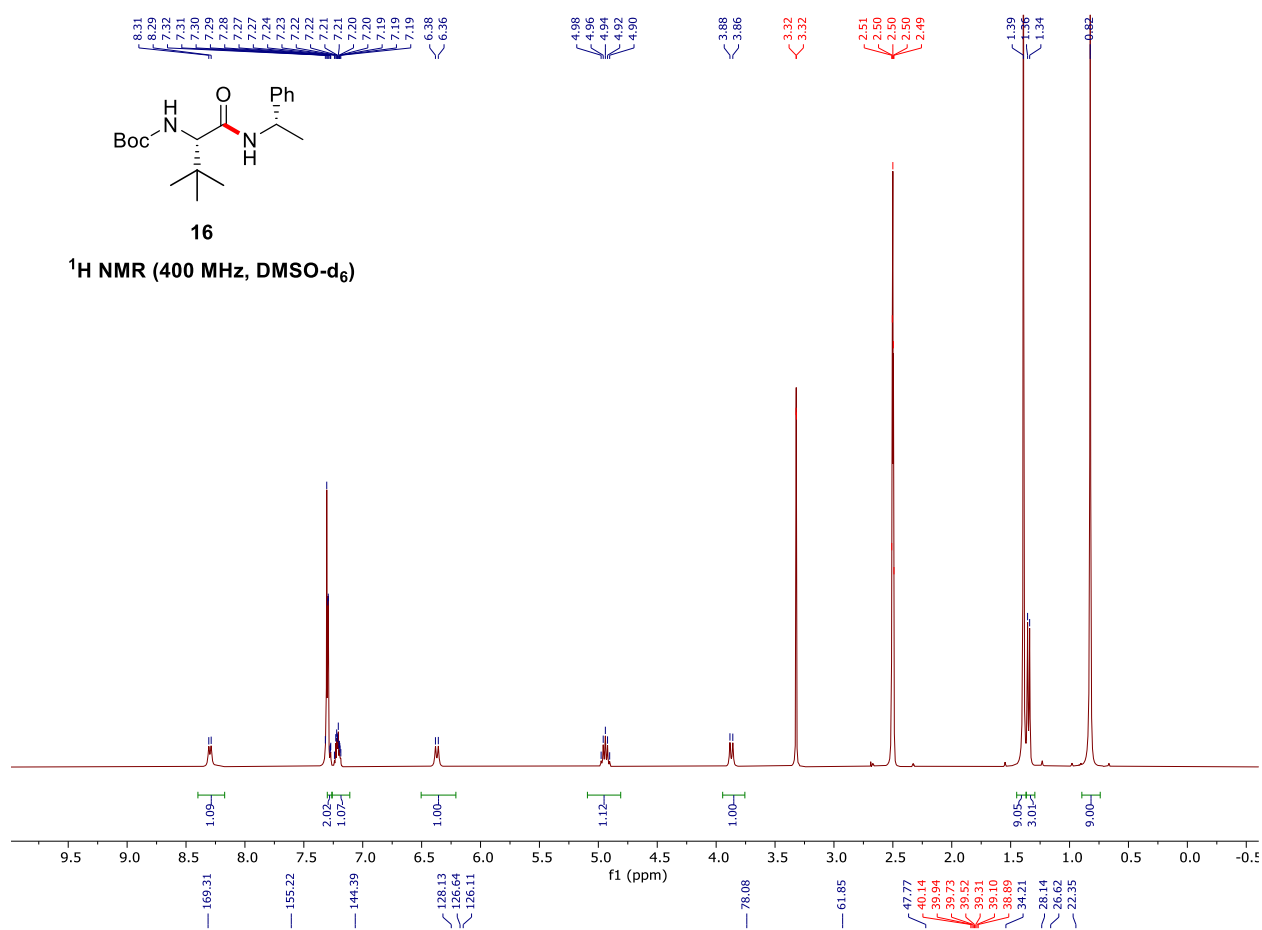



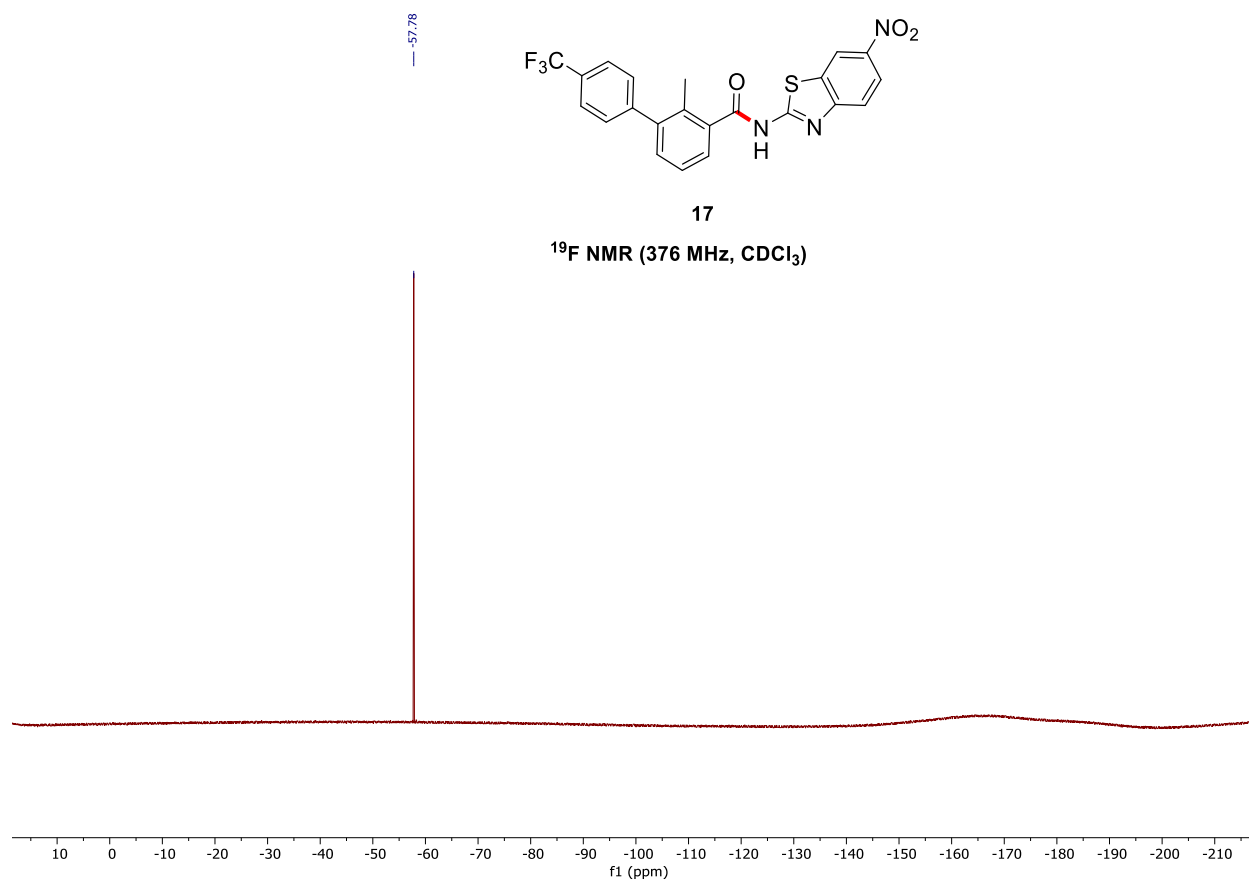

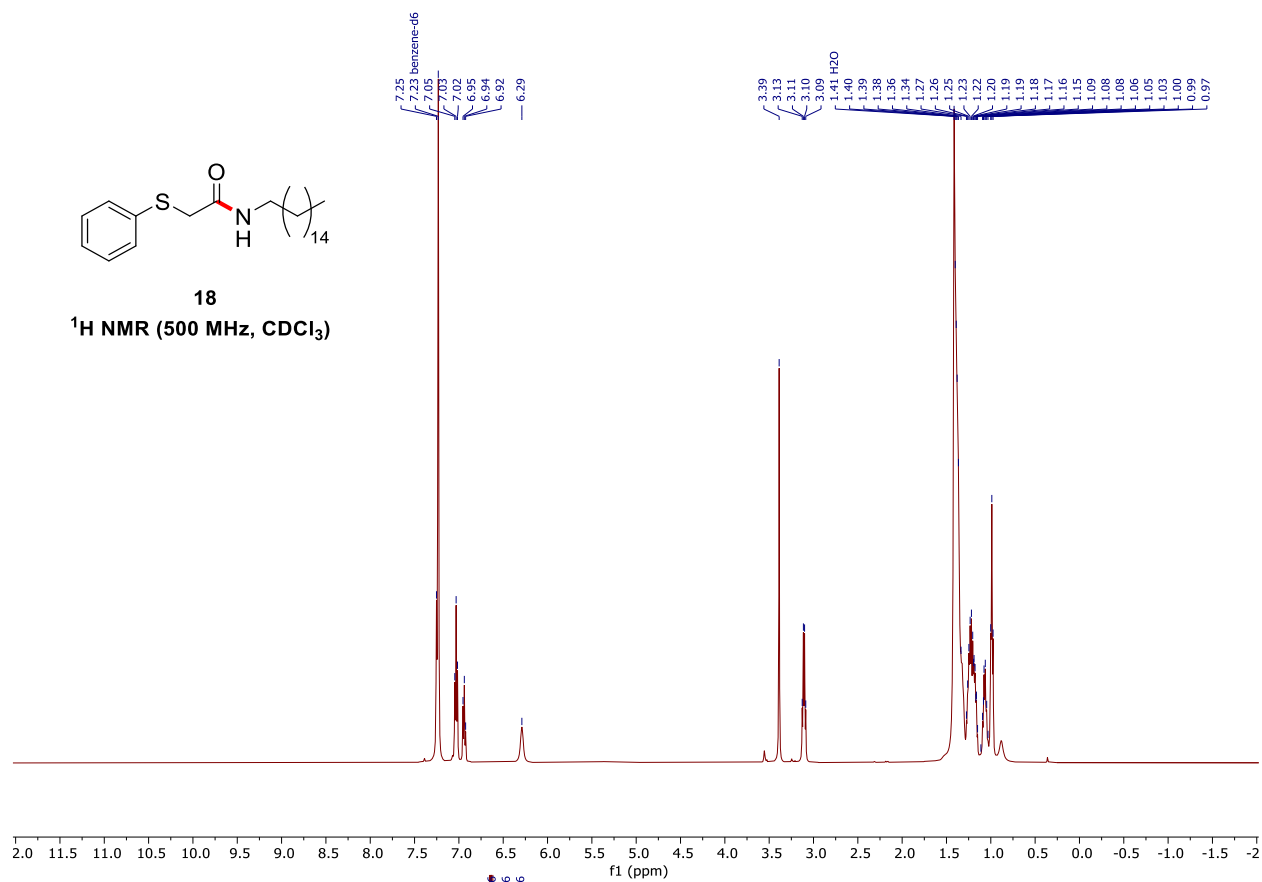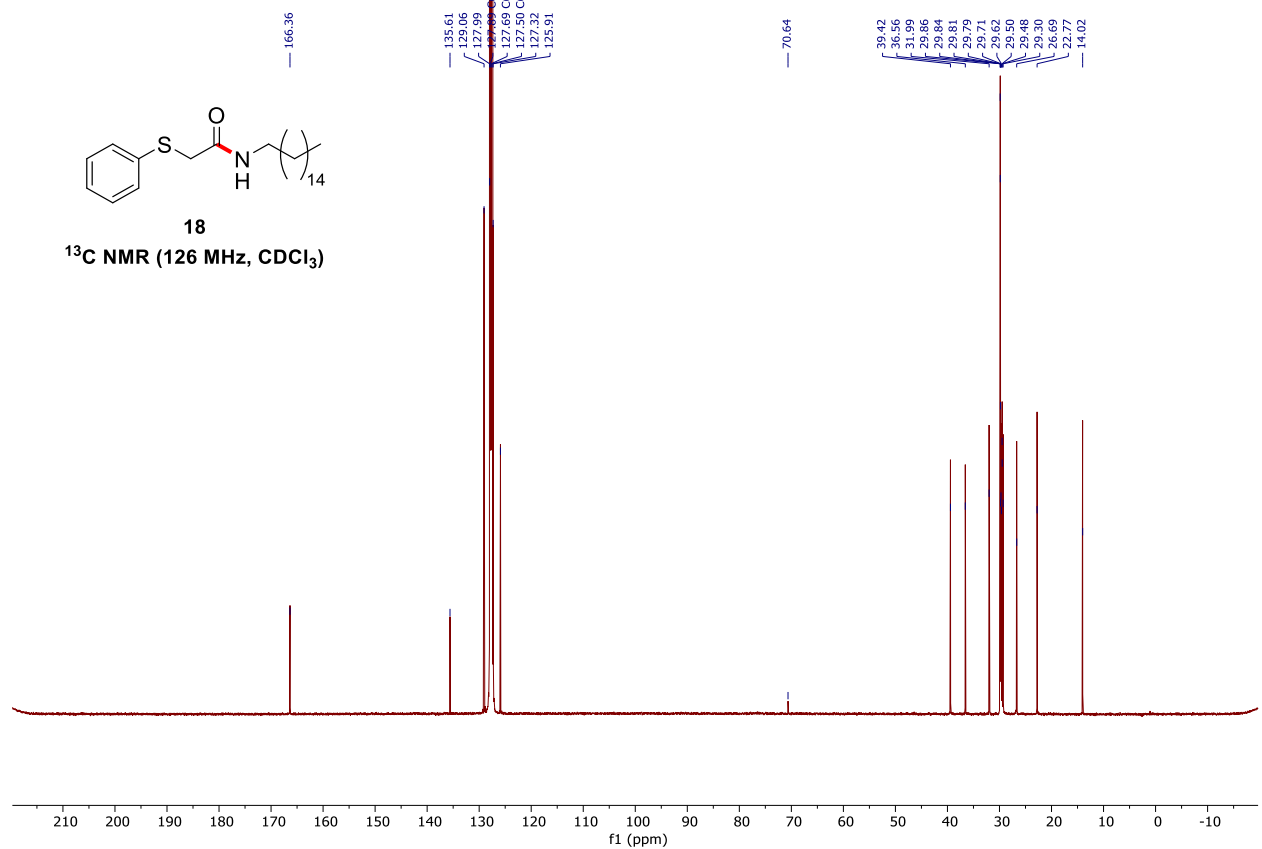

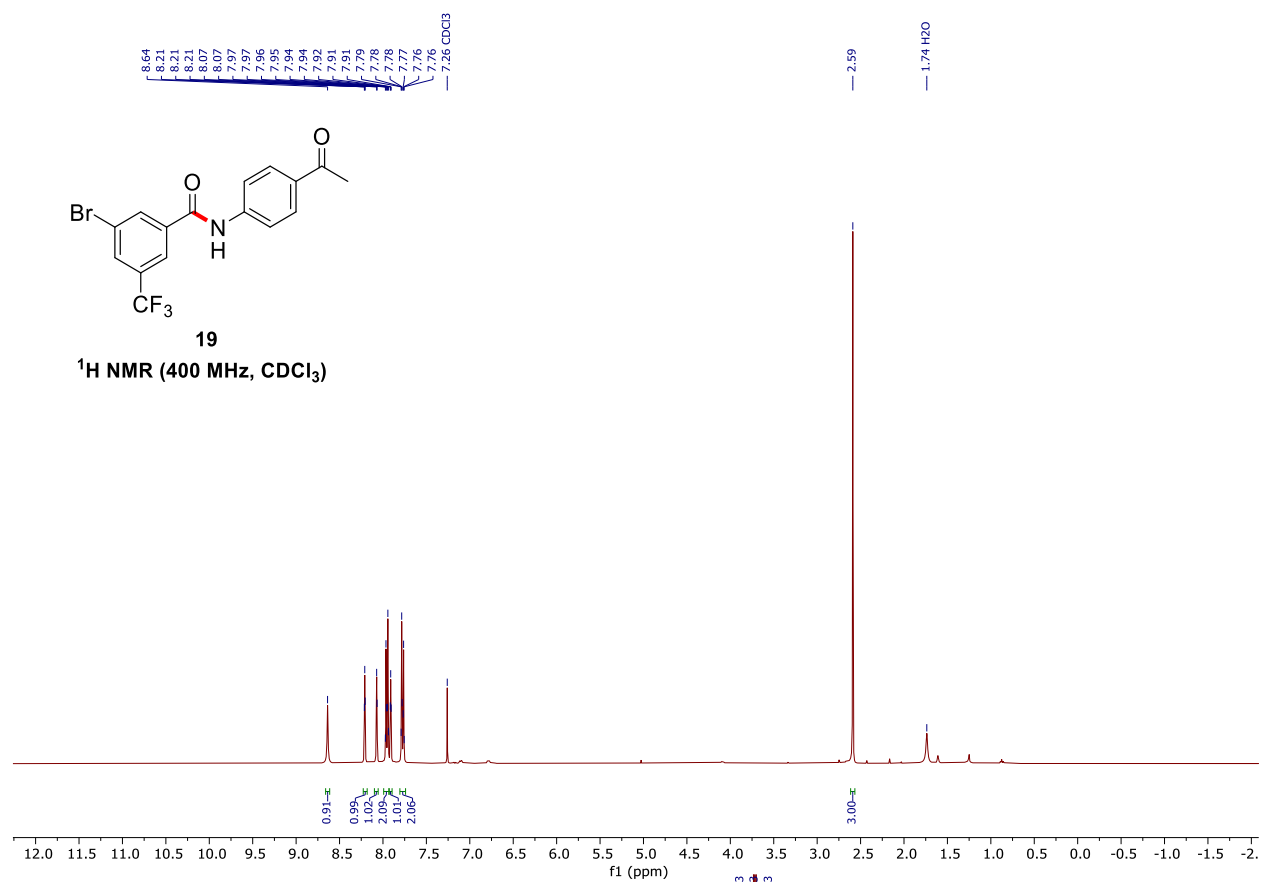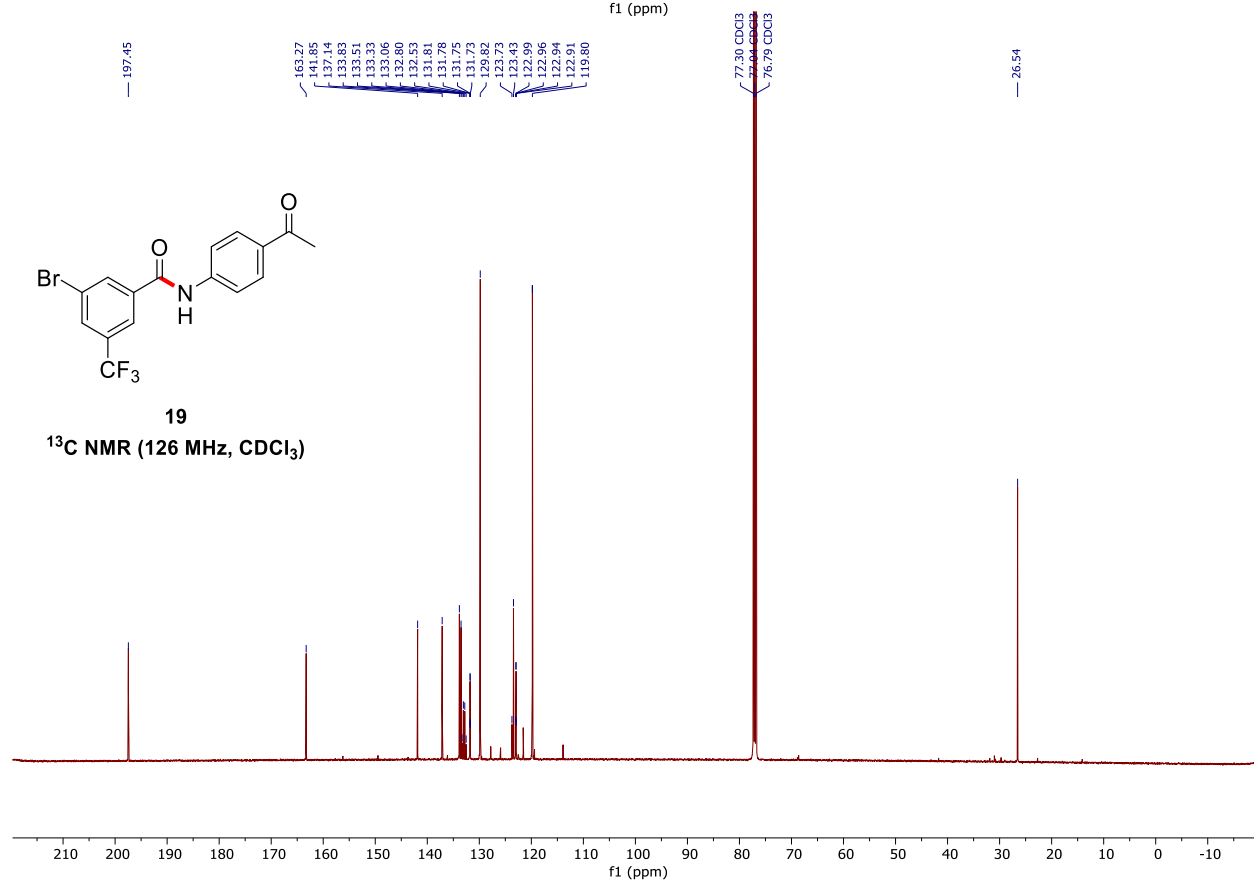

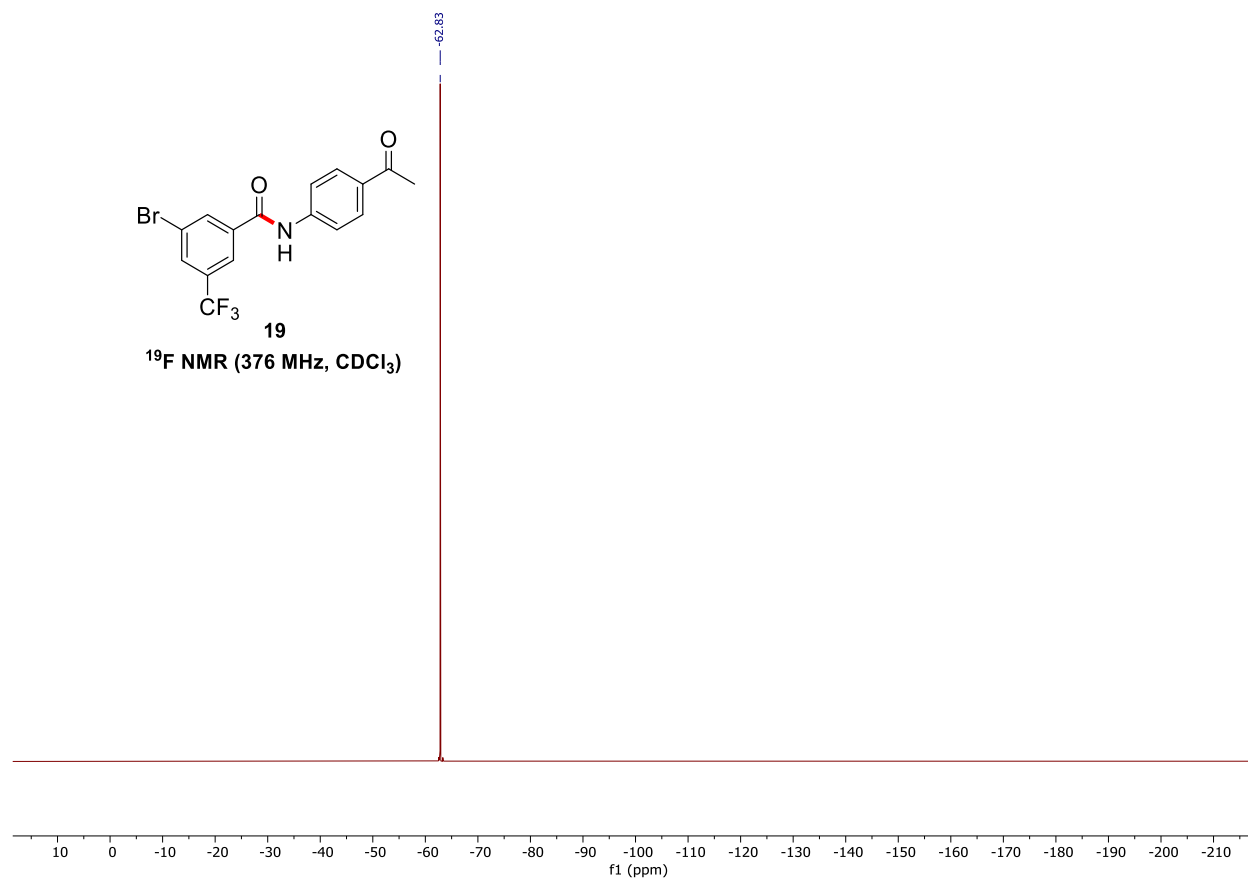

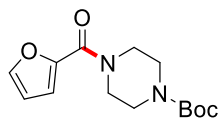

20

$^1\text{H}$  NMR (400 MHz,  $\text{CDCl}_3$ )

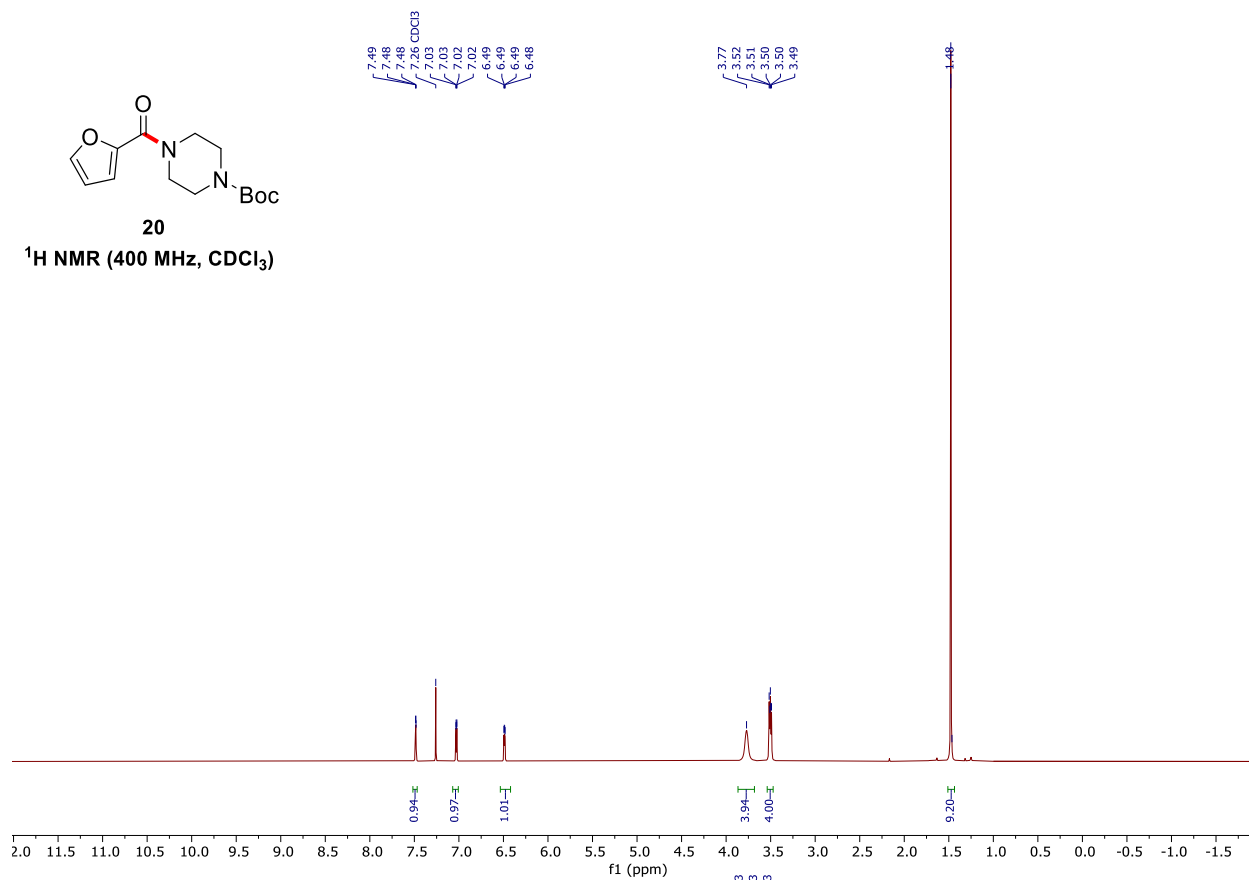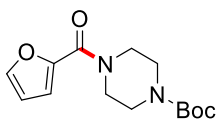

20

$^{13}\text{C}$  NMR (126 MHz,  $\text{CDCl}_3$ )

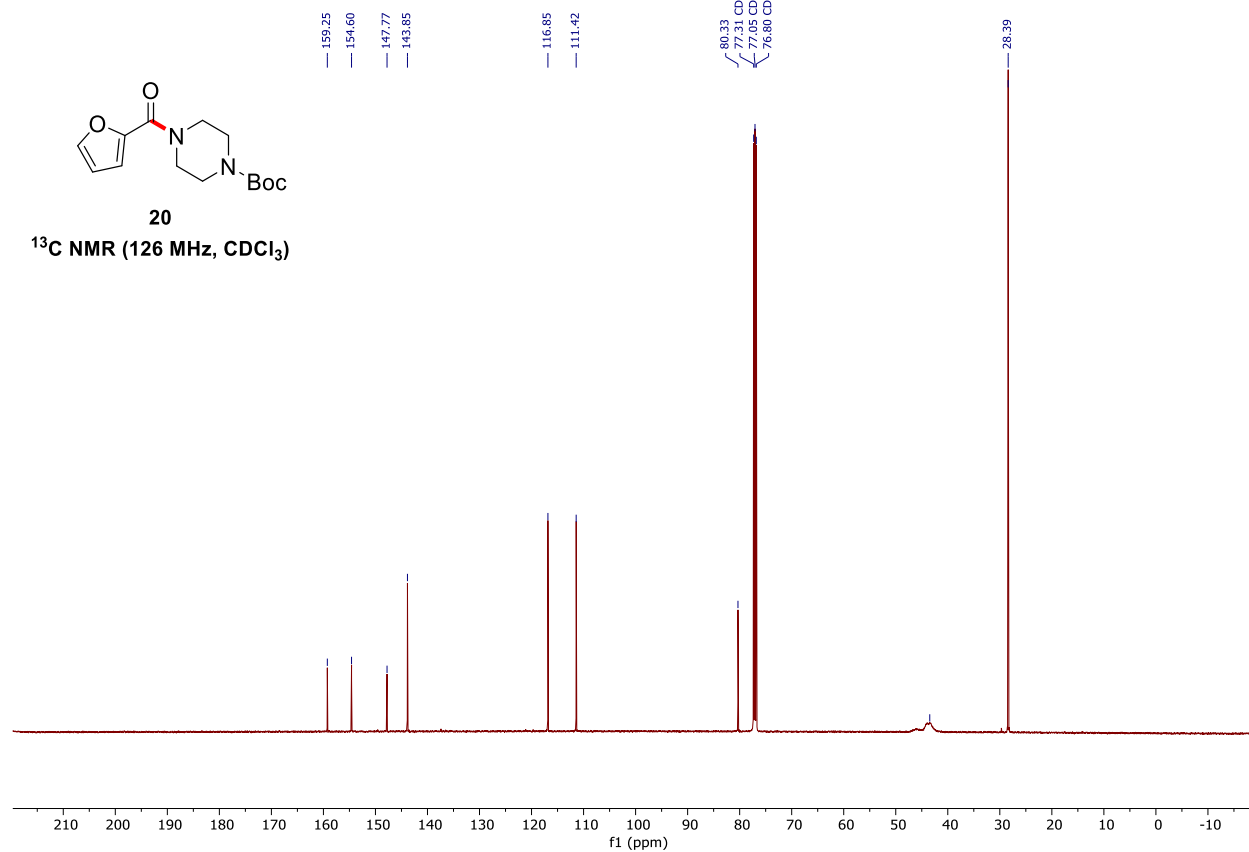

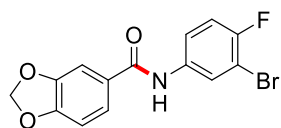

21

<sup>1</sup>H NMR (400 MHz, DMSO-*d*<sub>6</sub>)

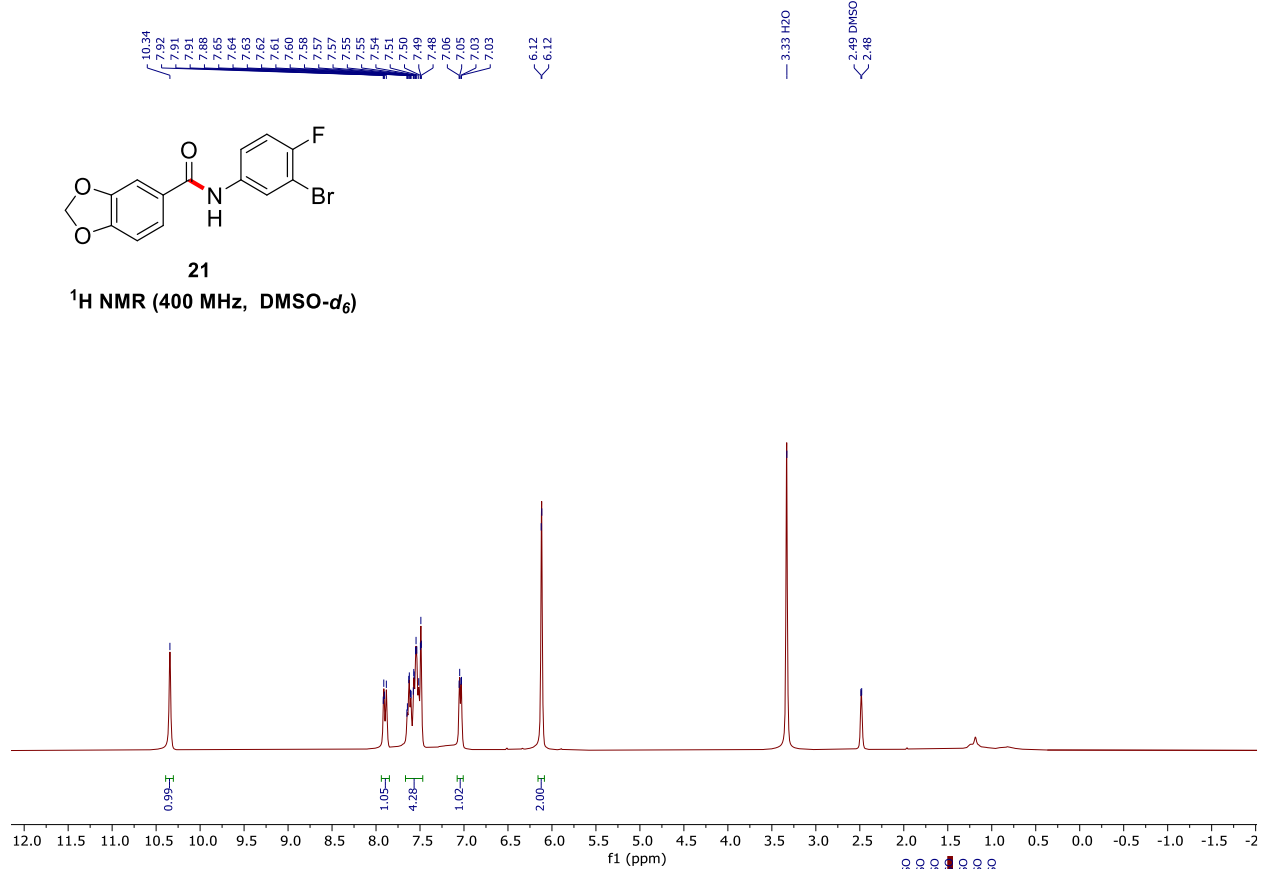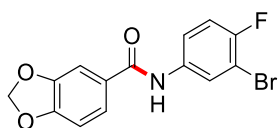

21

<sup>13</sup>C NMR (101 MHz, DMSO-*d*<sub>6</sub>)

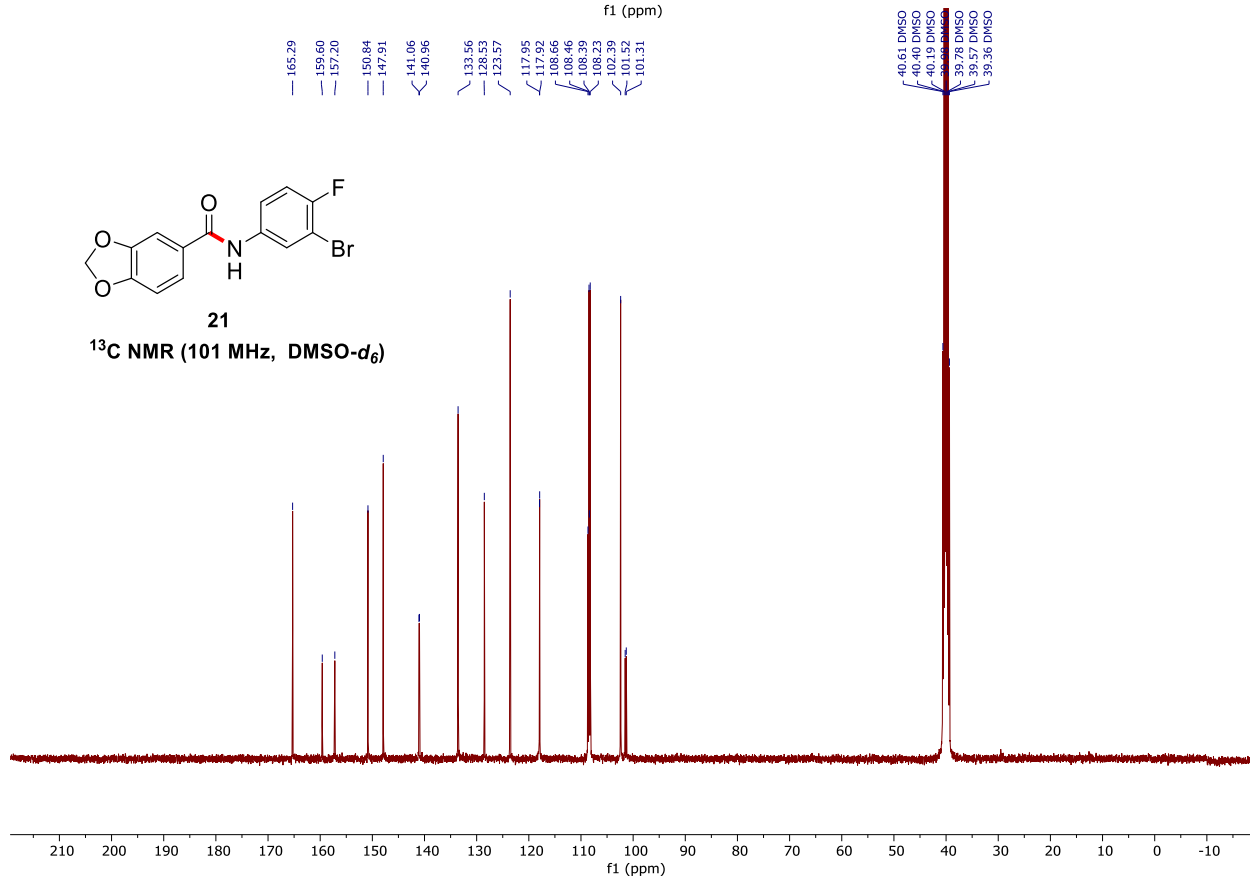

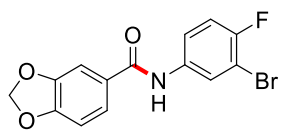

21

$^{19}\text{F}$ NMR (376 MHz,  $\text{DMSO-}d_6$ )

-107.14  
-107.17  
-107.20  
-107.58

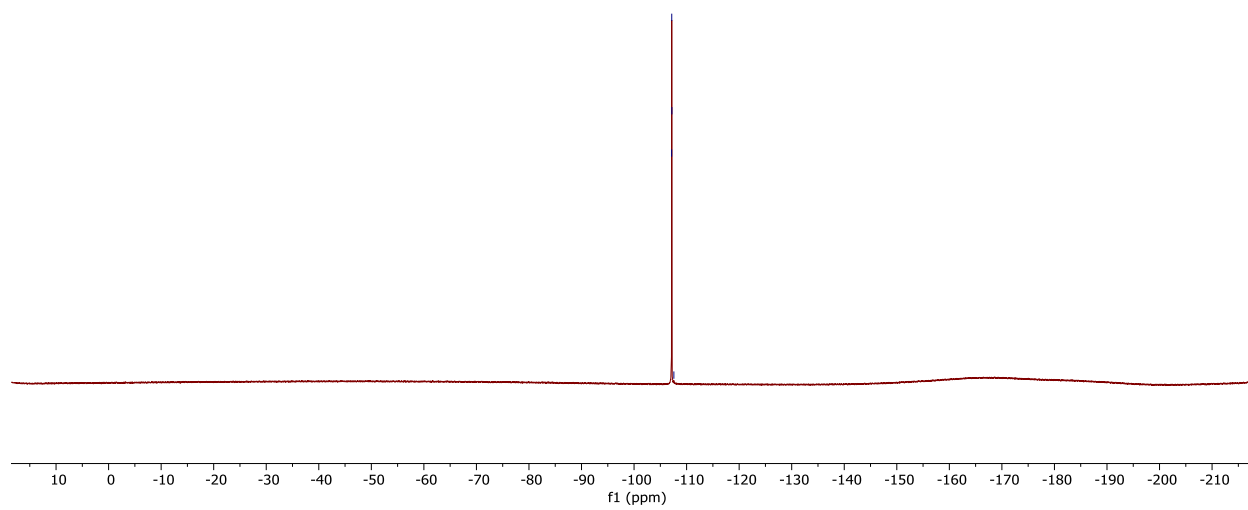

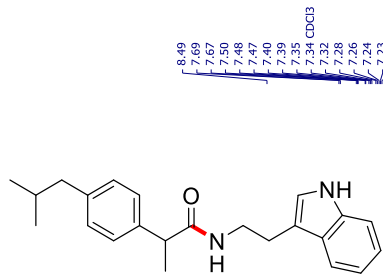

22

<sup>1</sup>H NMR (500 MHz, CDCl<sub>3</sub>)

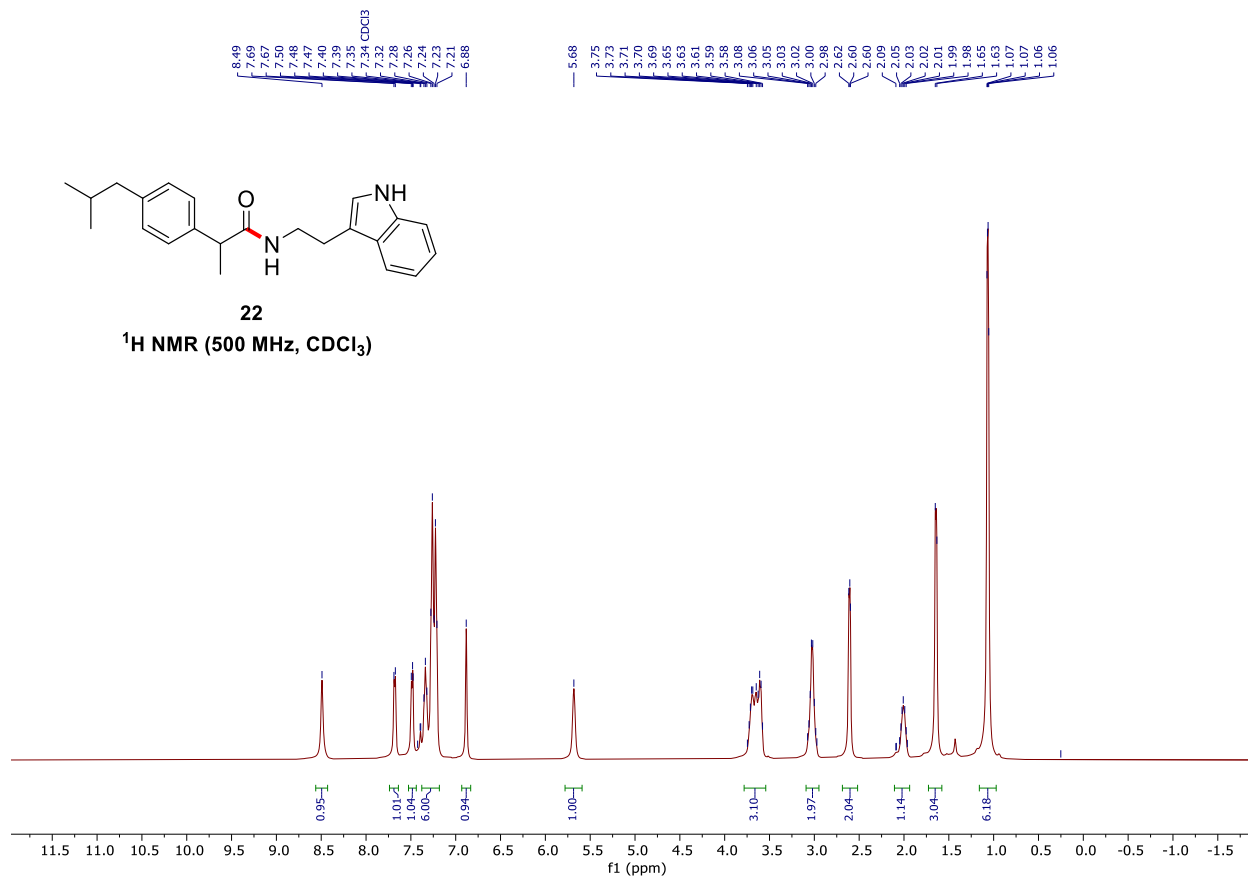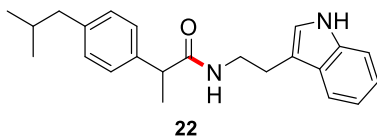

22

<sup>13</sup>C NMR (126 MHz, CDCl<sub>3</sub>)

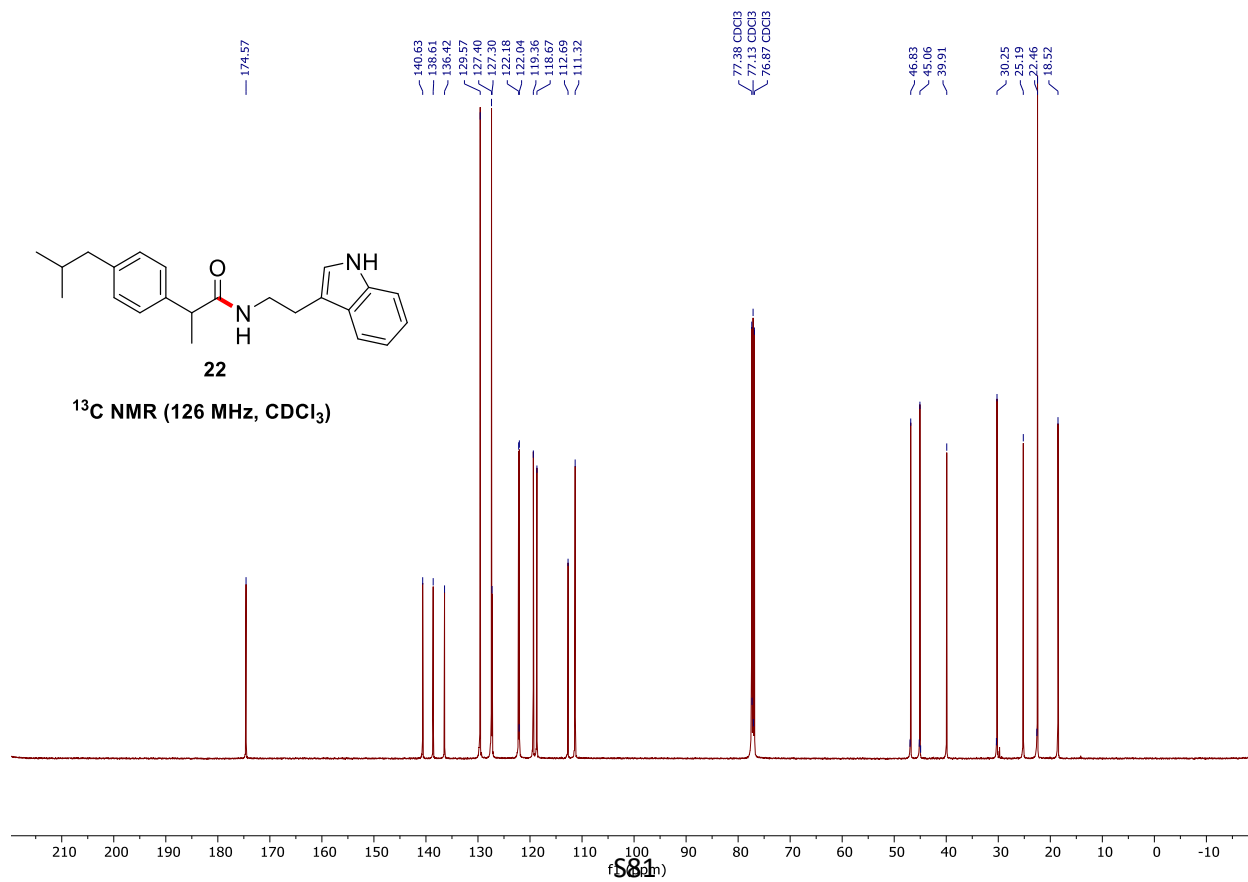

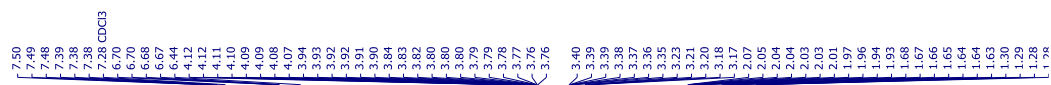<sup>1</sup>H NMR (500 MHz, CDCl<sub>3</sub>)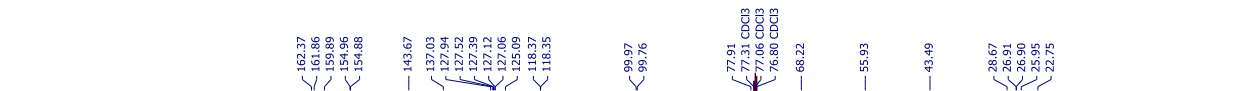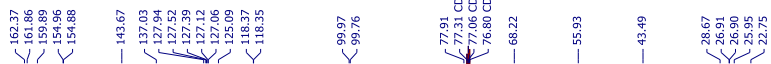 $^{13}\text{C}$  NMR (126 MHz,  $\text{CDCl}_3$ )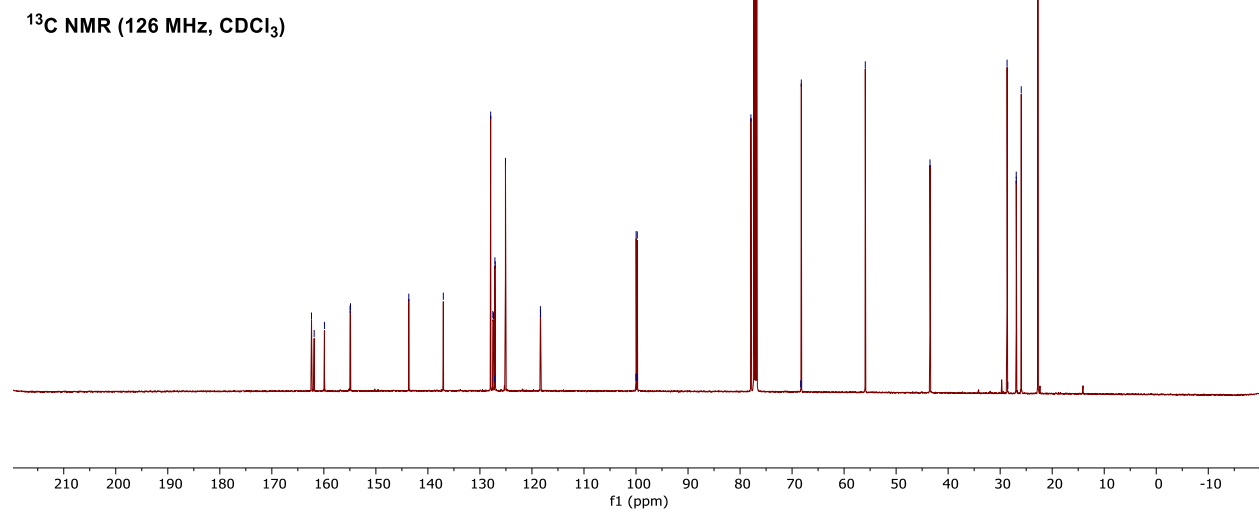

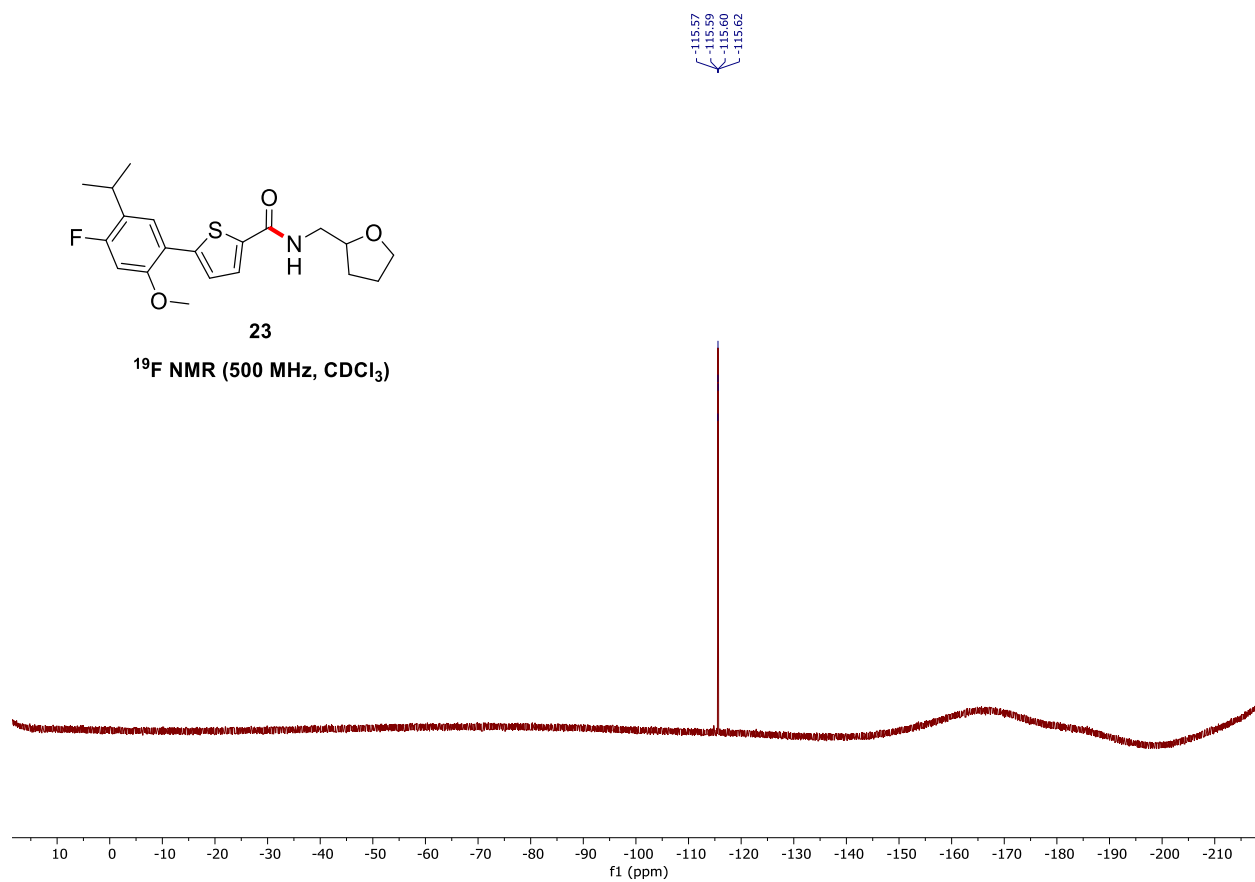

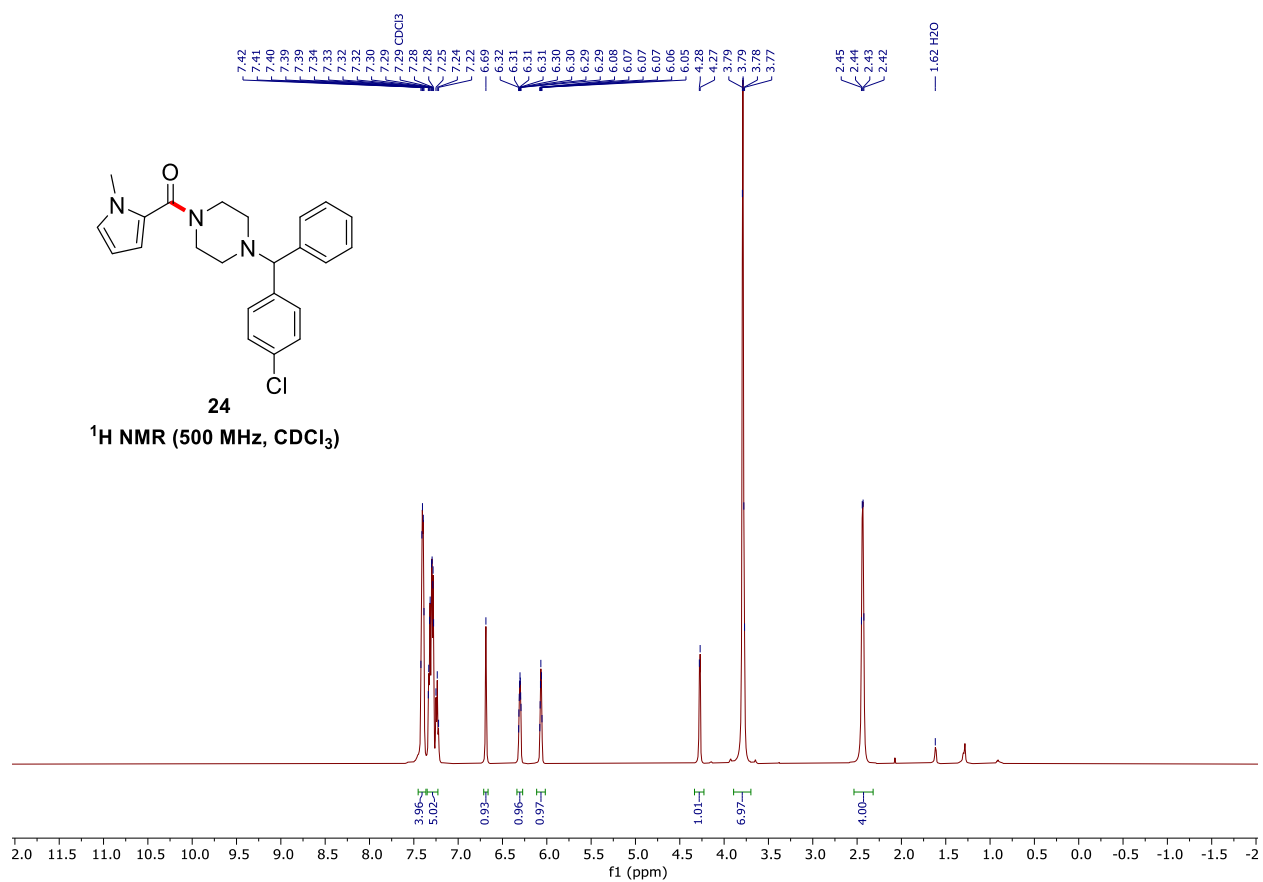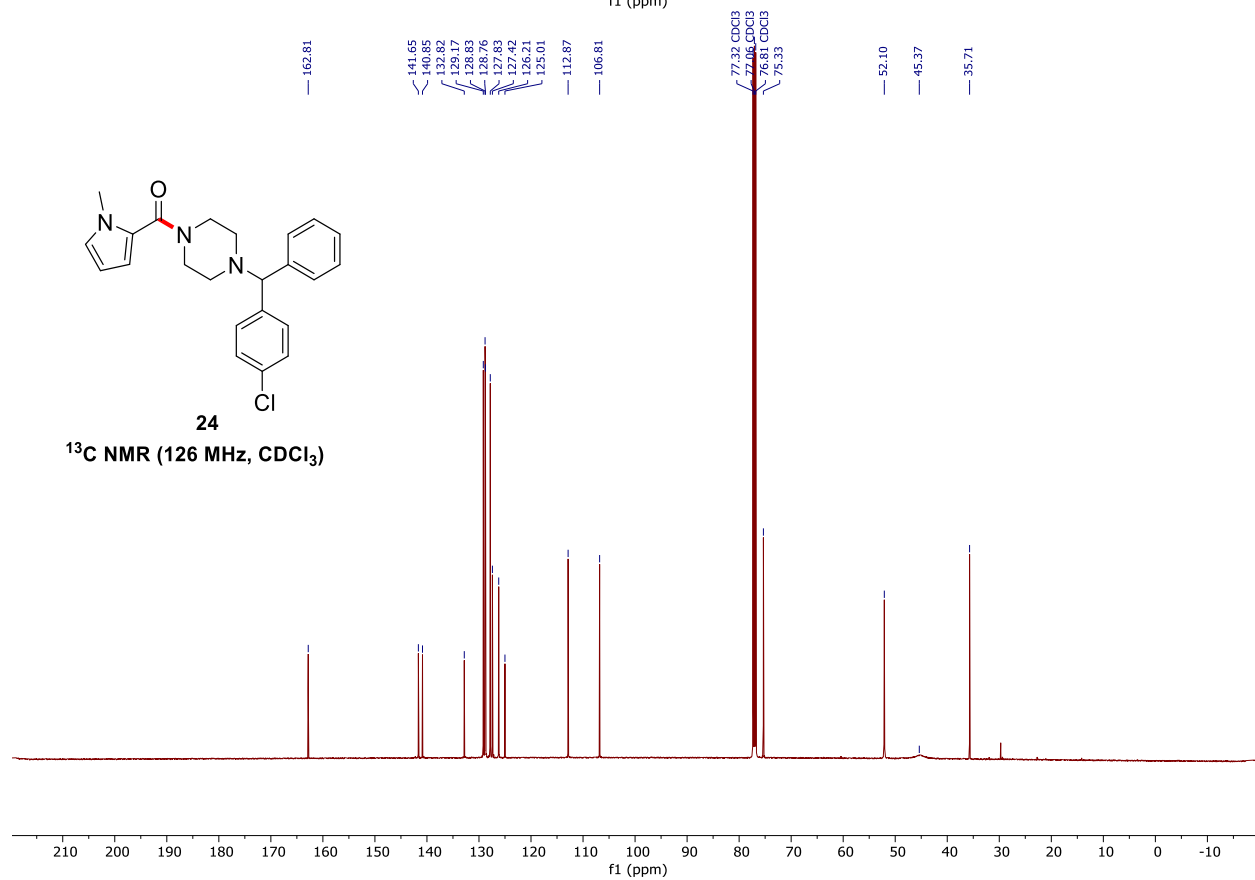

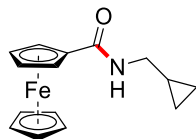

**25**

$^1\text{H}$  NMR (500 MHz,  $\text{CDCl}_3$ )

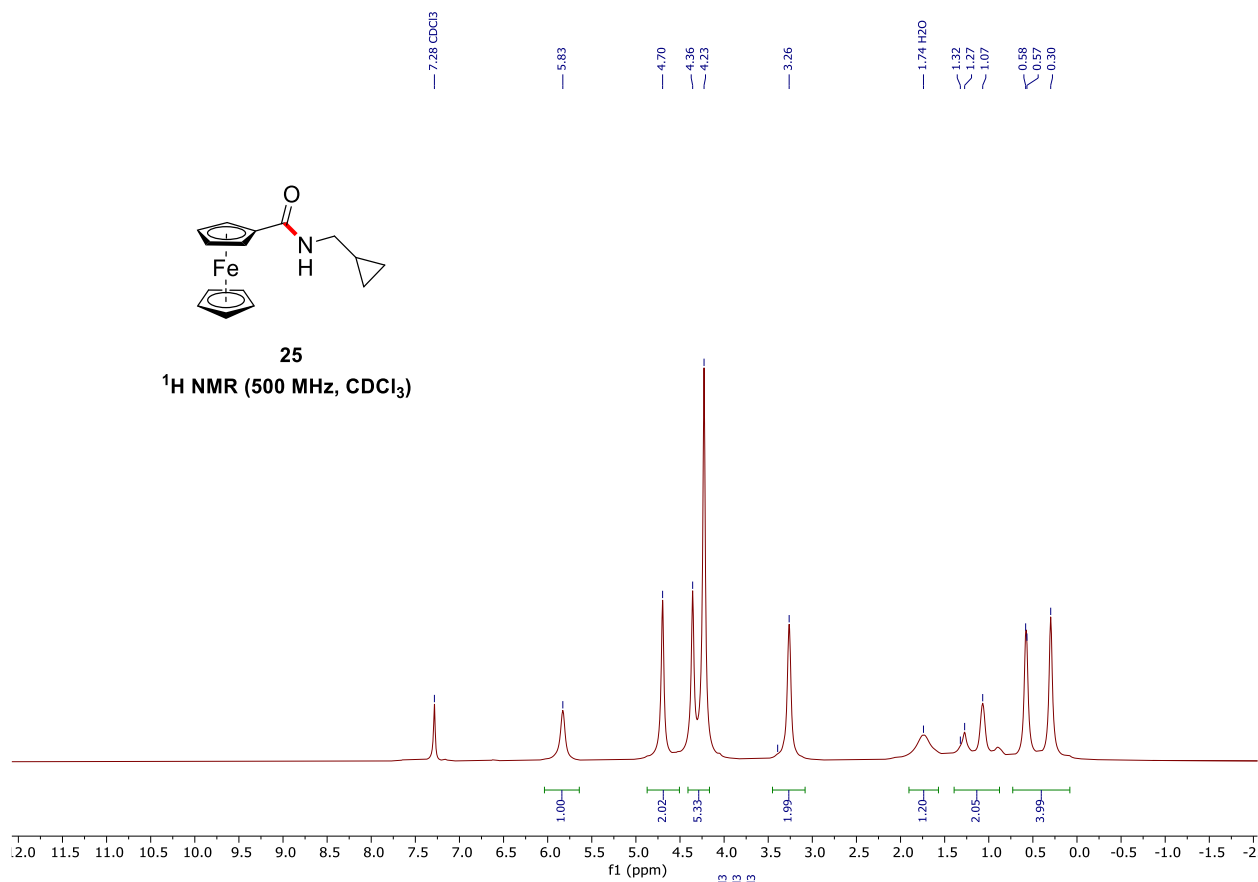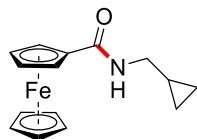

**25**

$^{13}\text{C}$  NMR (126 MHz,  $\text{CDCl}_3$ )

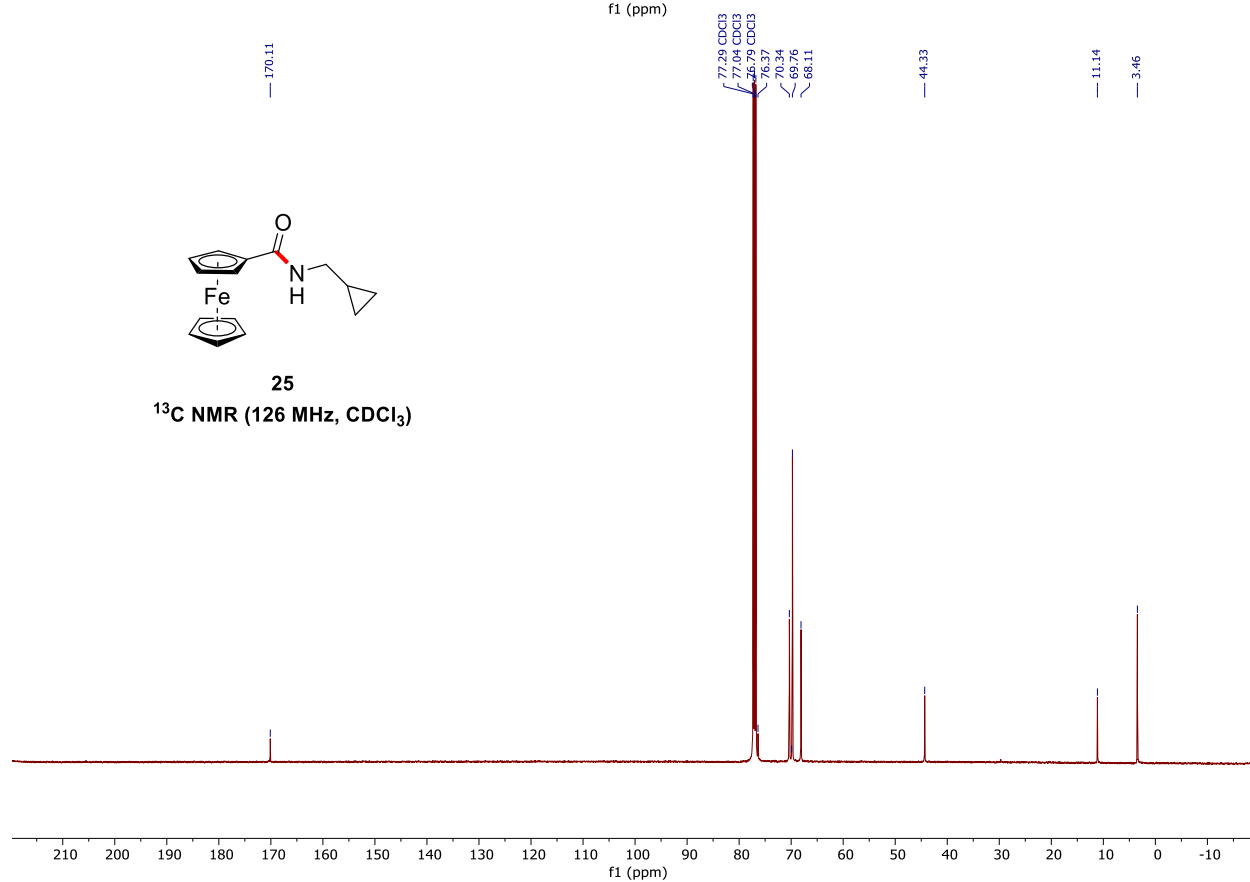

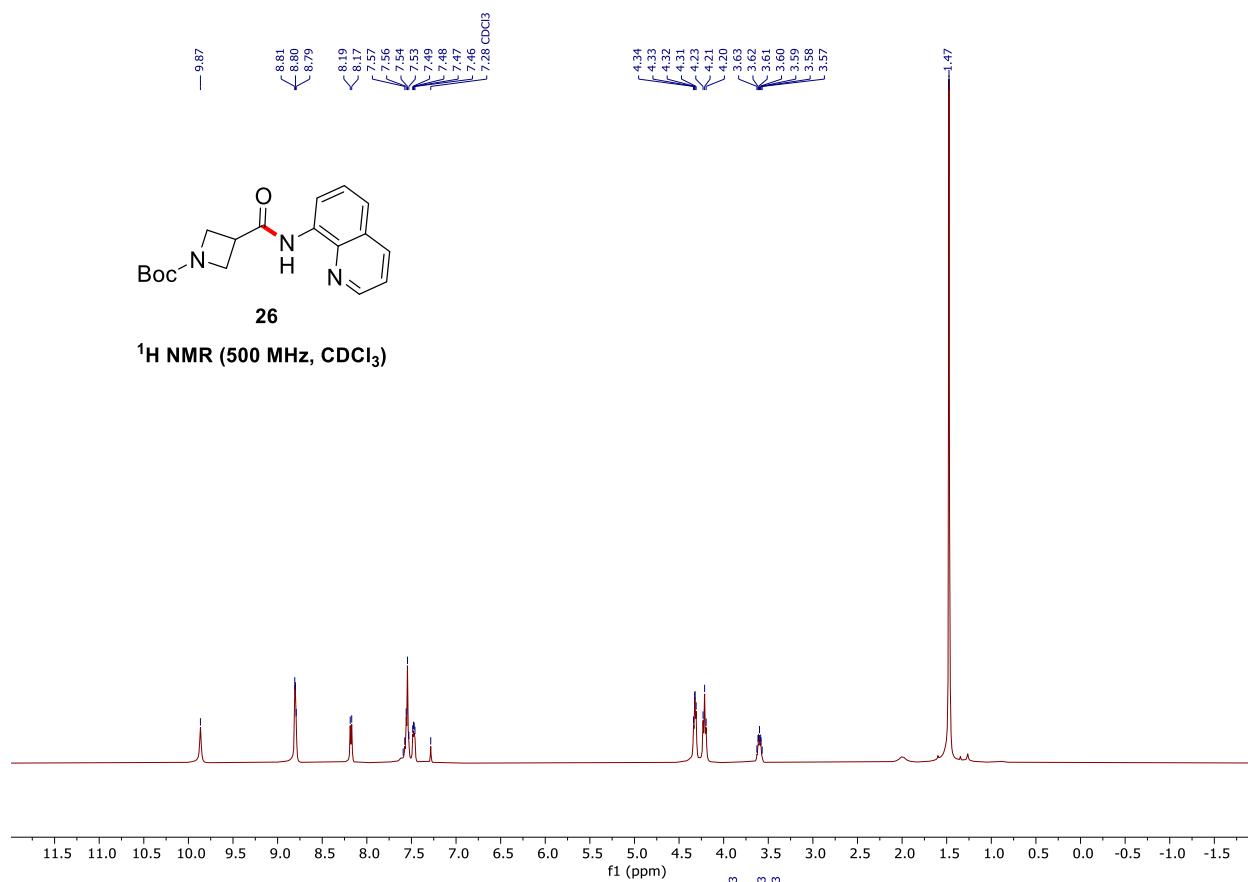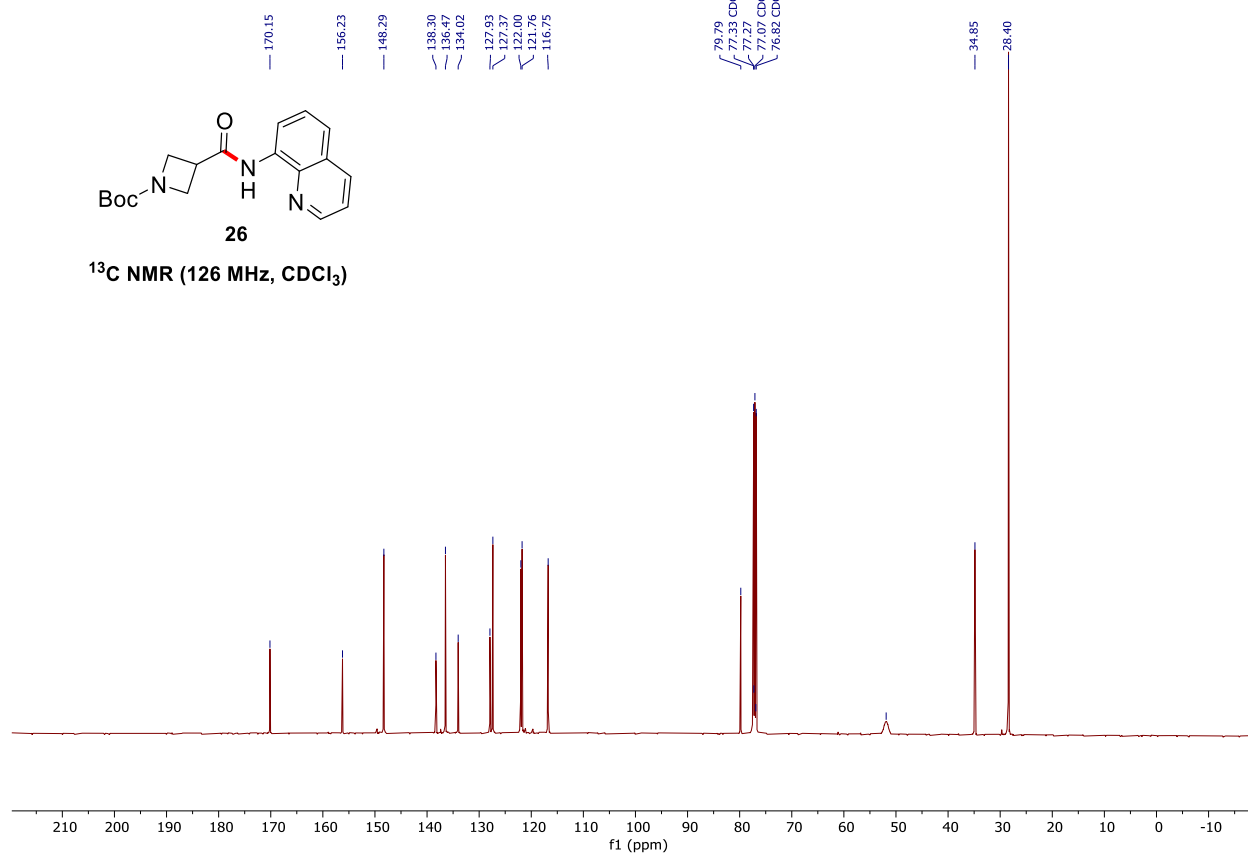

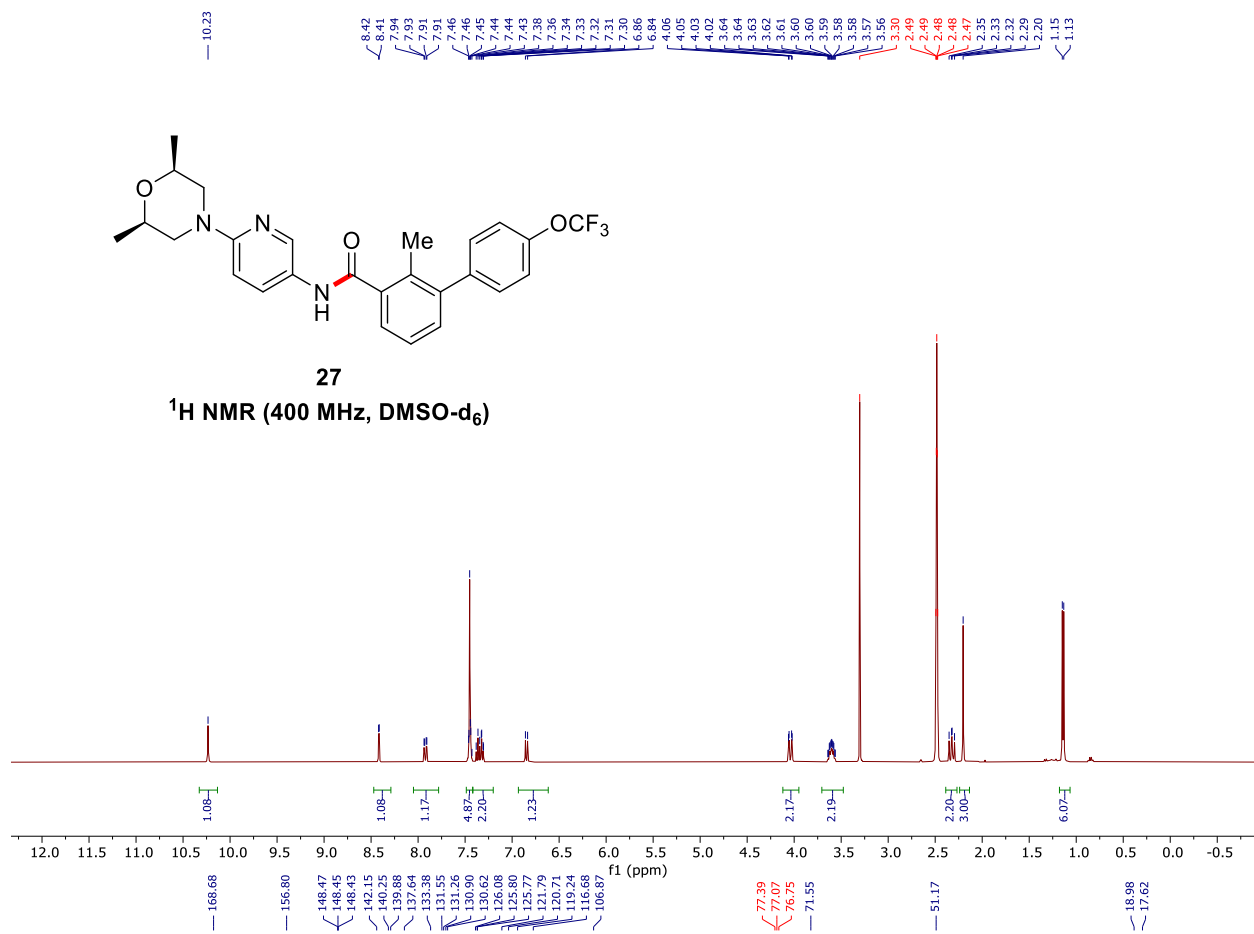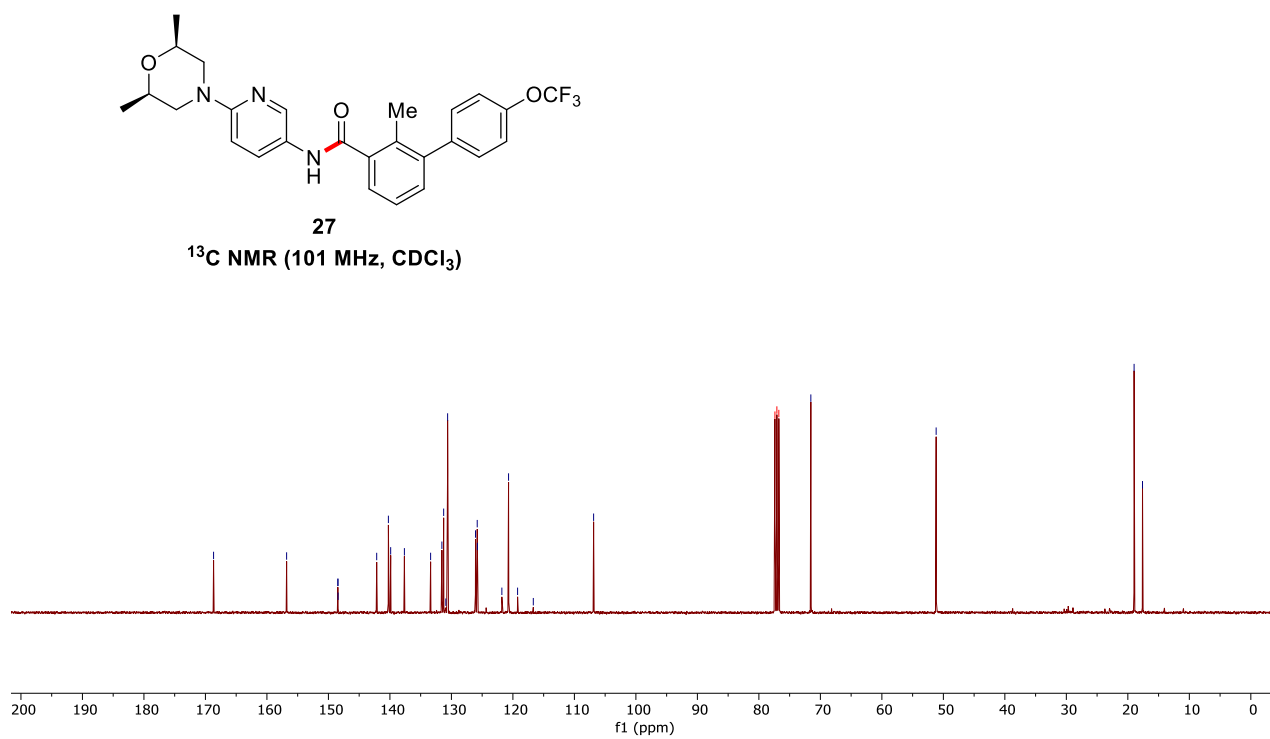

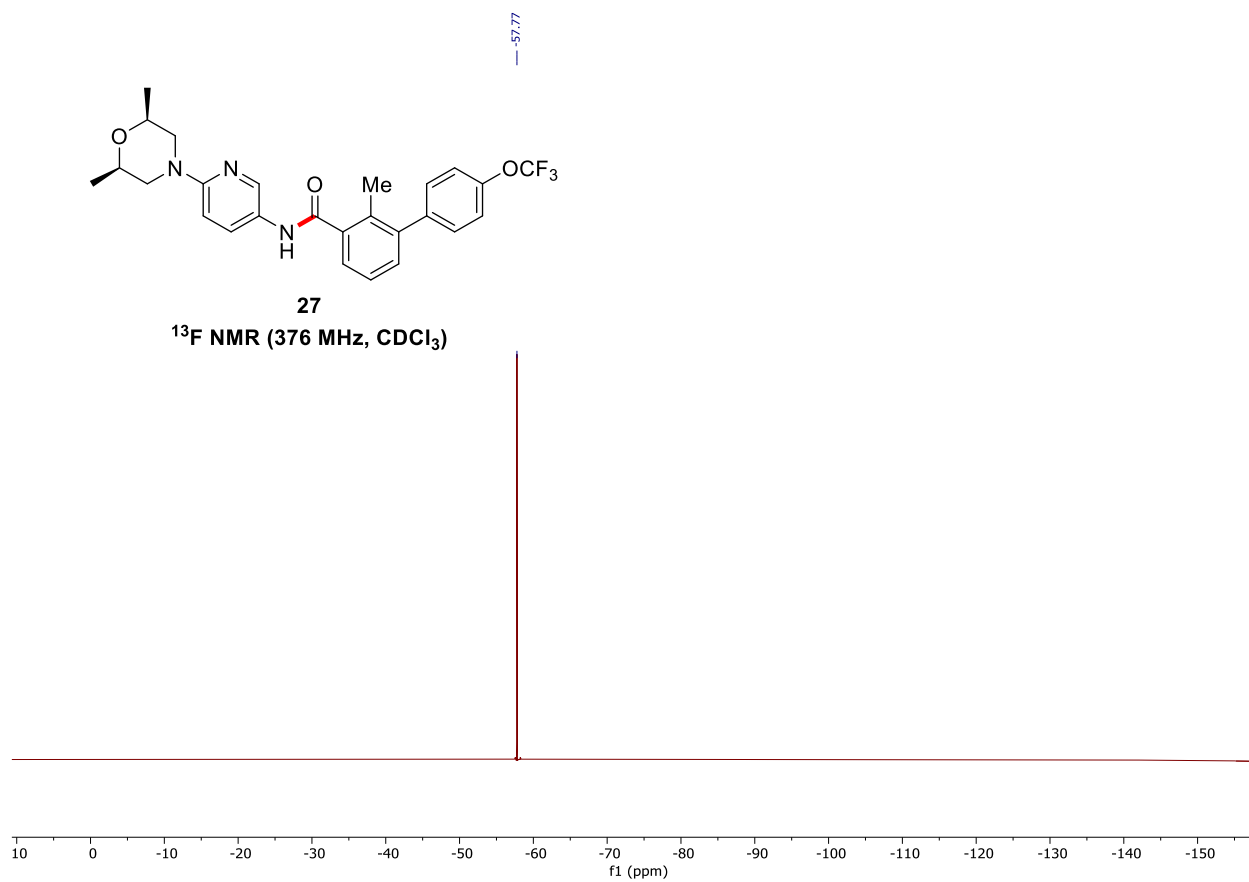

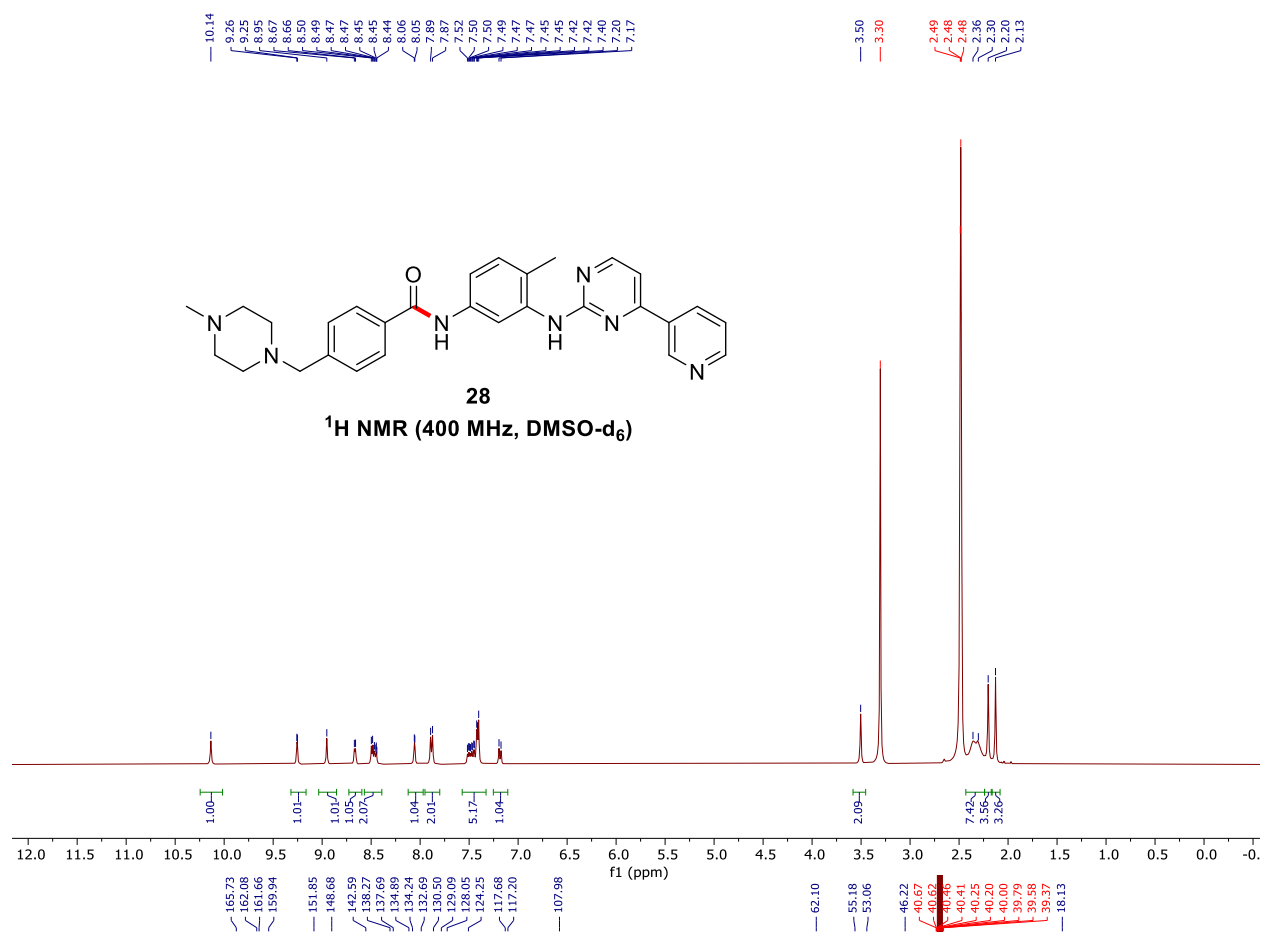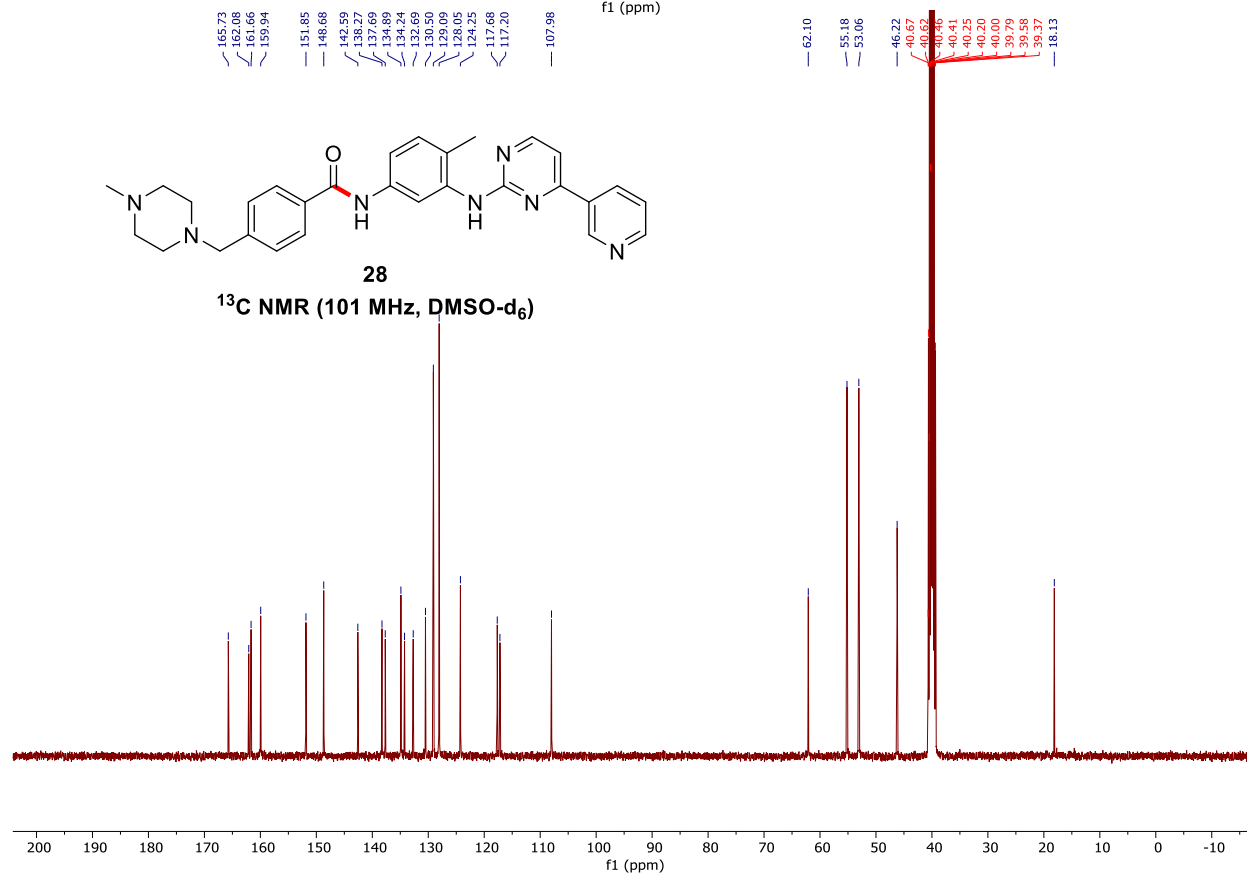

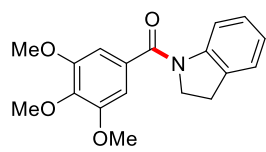

29

<sup>1</sup>H NMR (500 MHz, CDCl<sub>3</sub>)

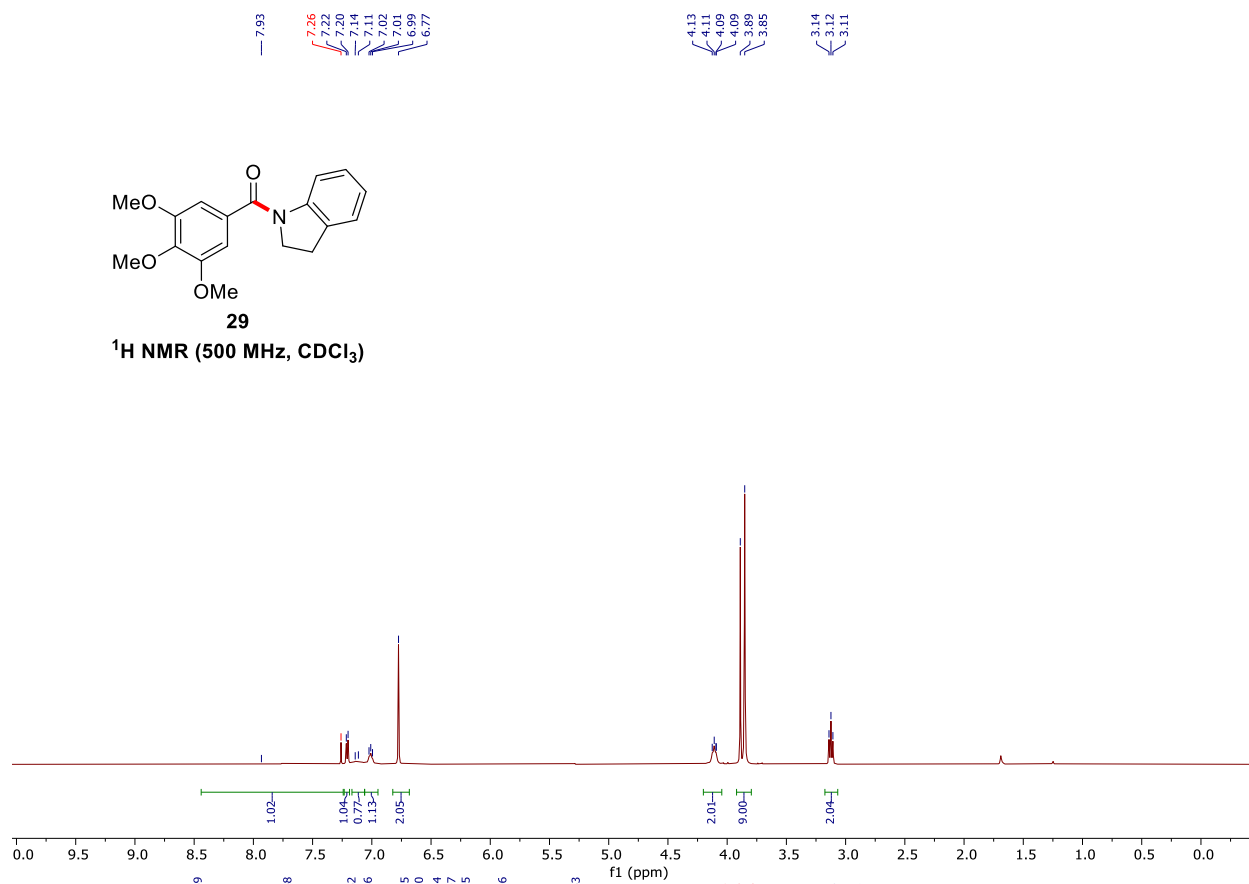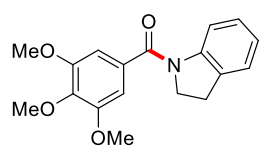

29

<sup>13</sup>C NMR (101 MHz, CDCl<sub>3</sub>)

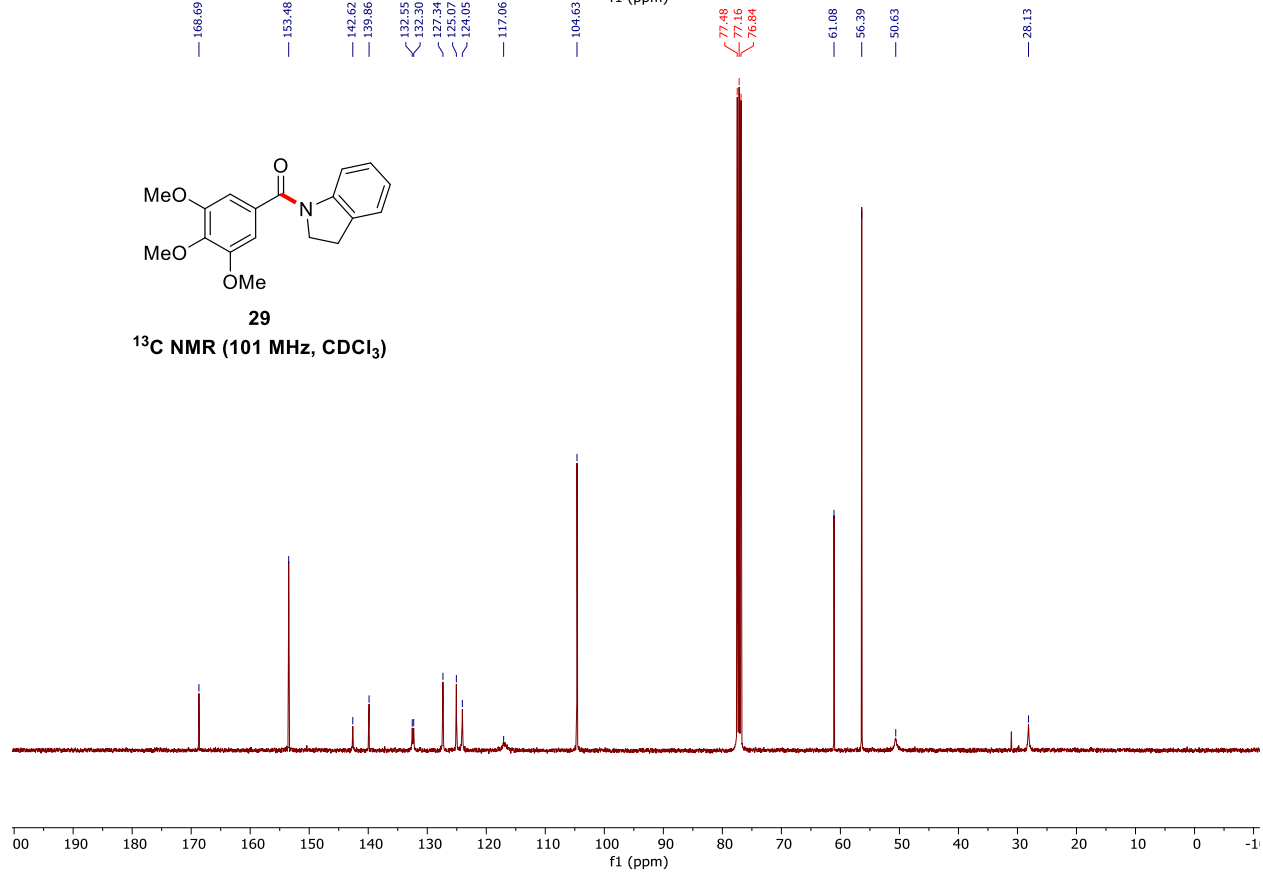

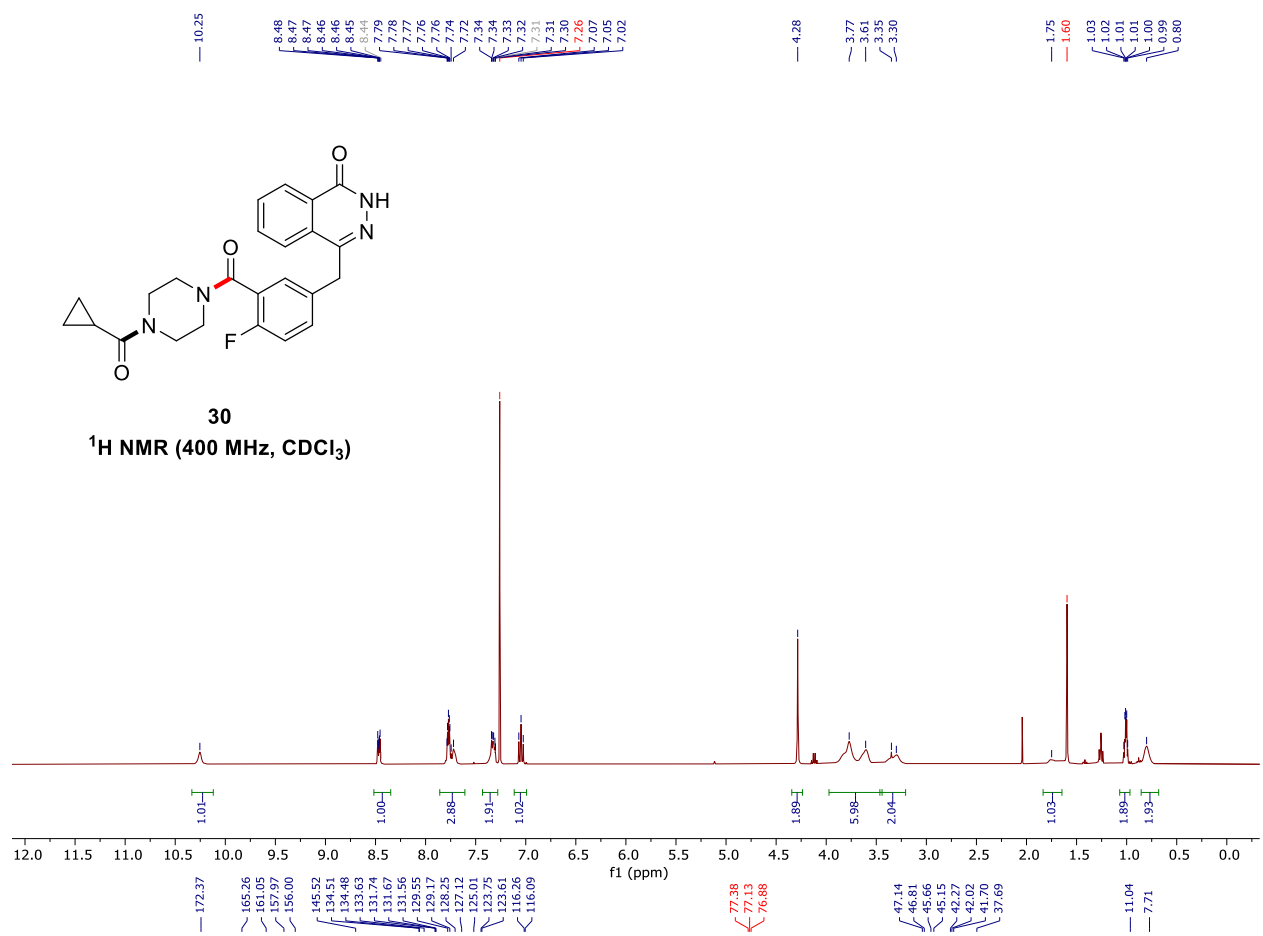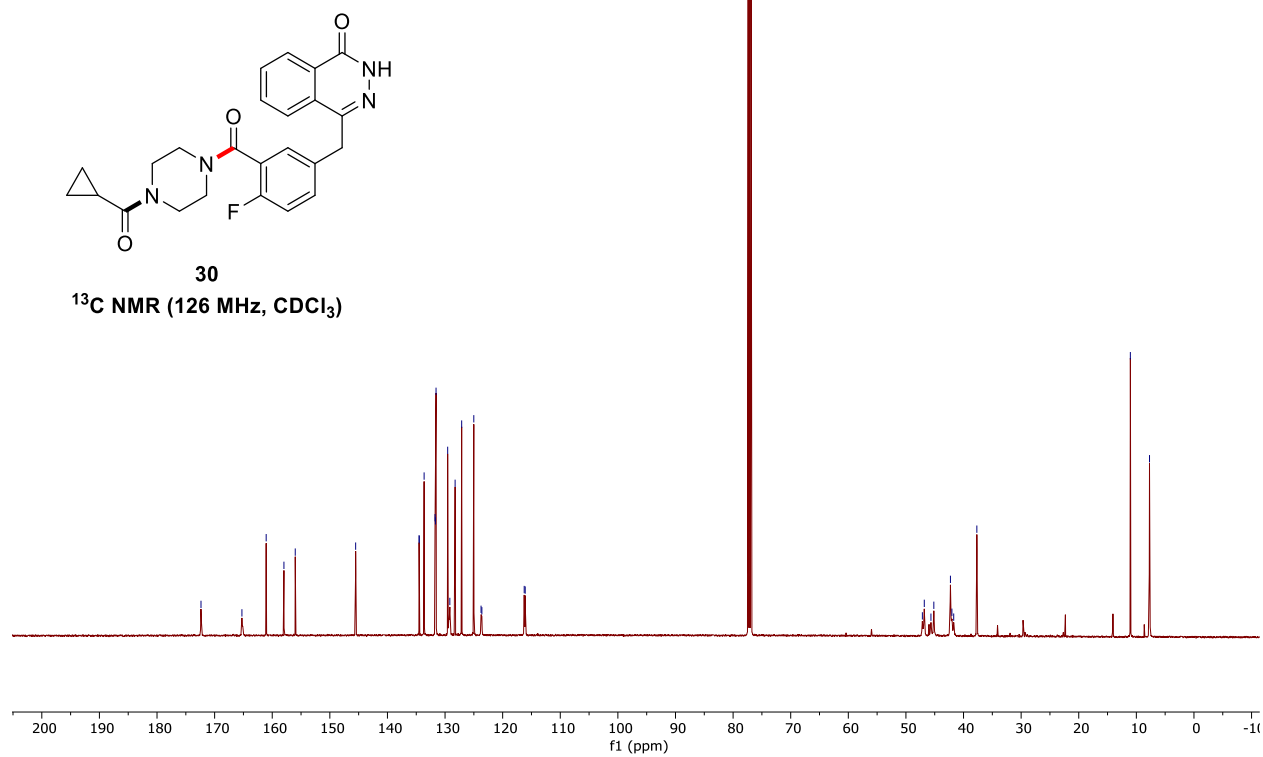

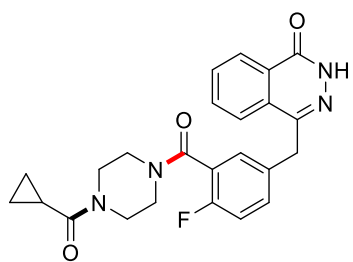

30

$^{19}\text{F}$  NMR (376 MHz,  $\text{CDCl}_3$ )

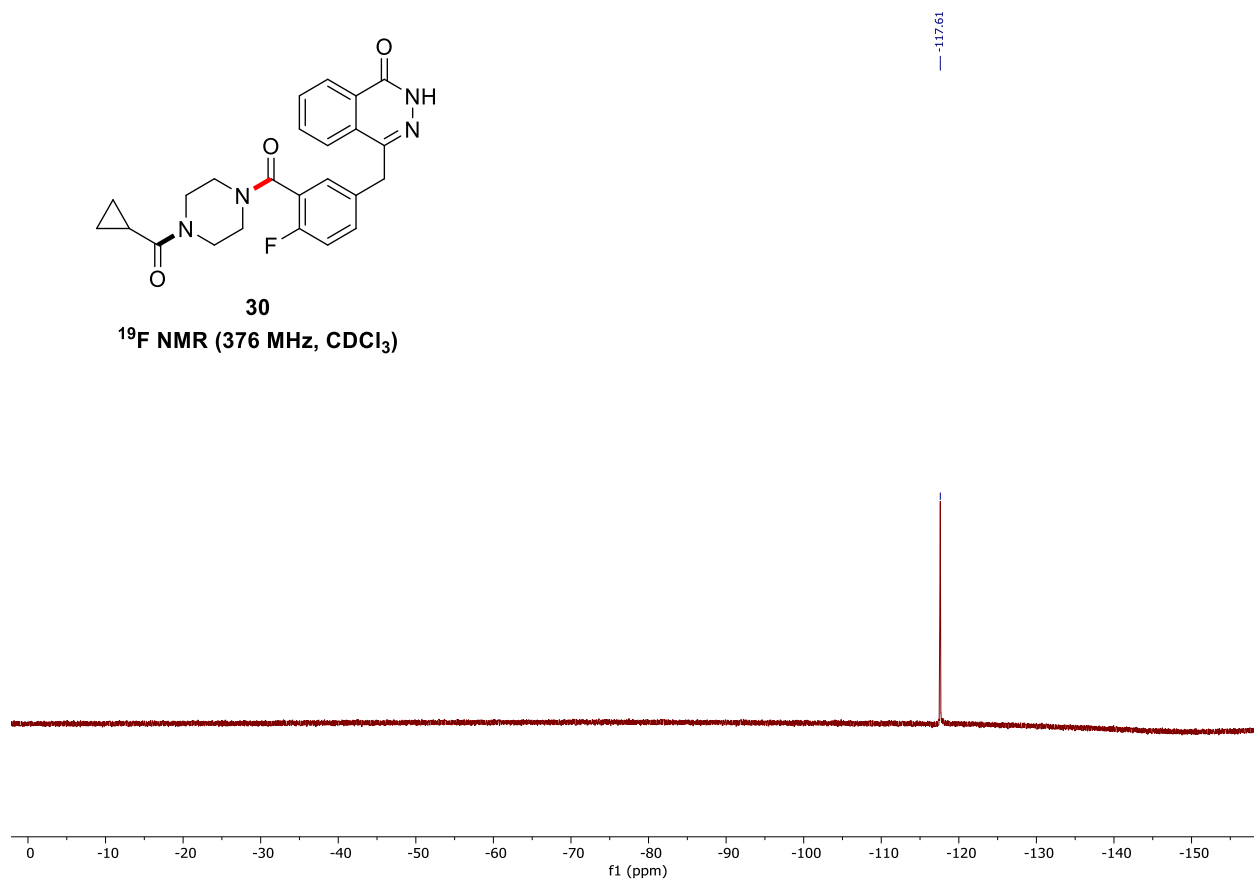

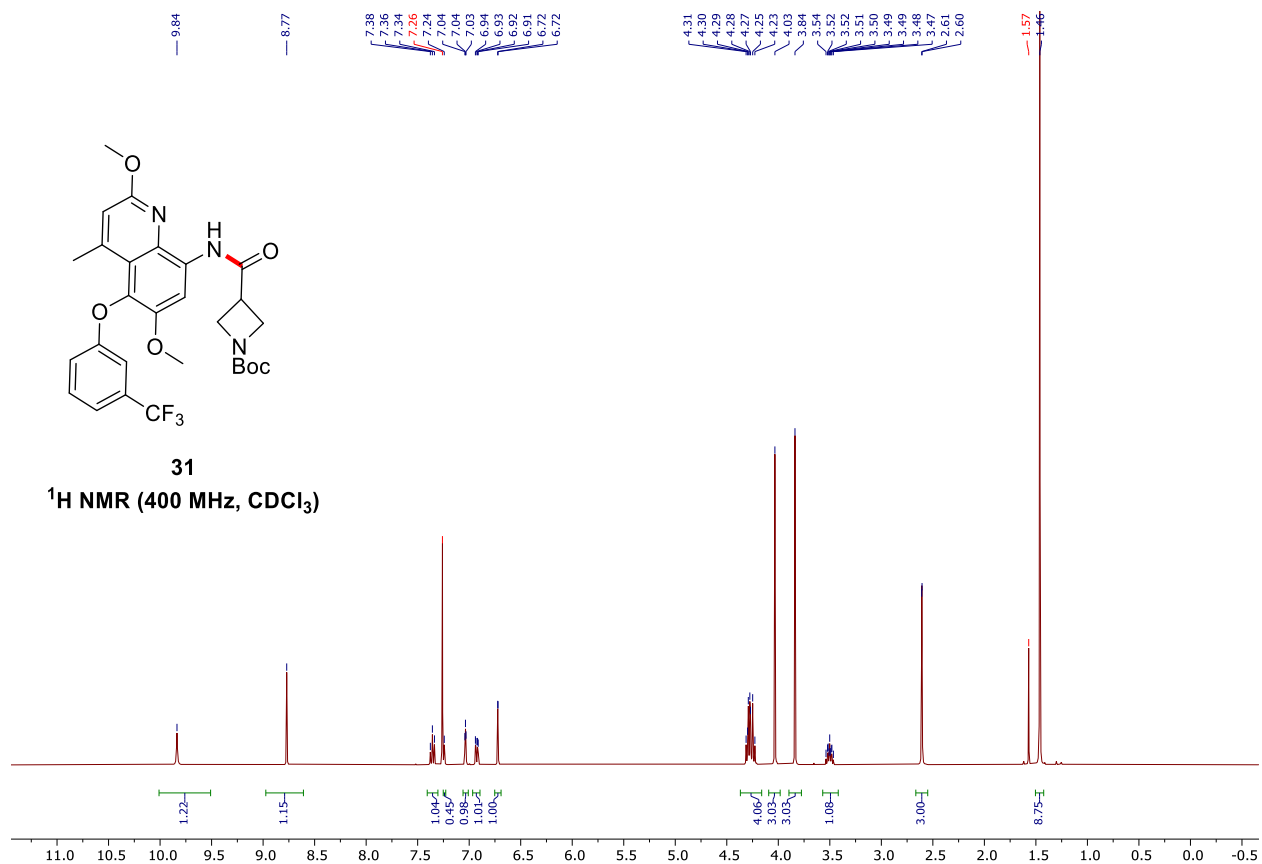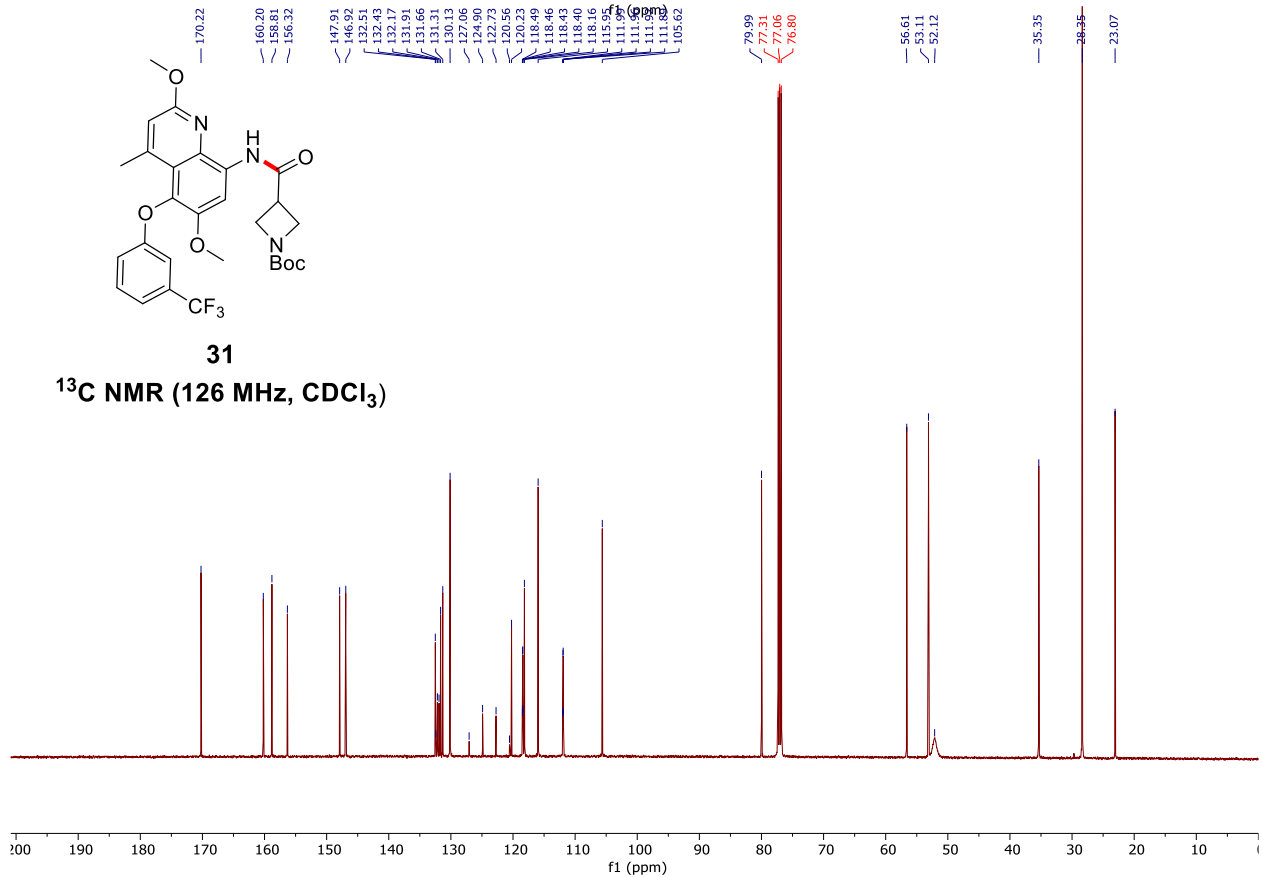

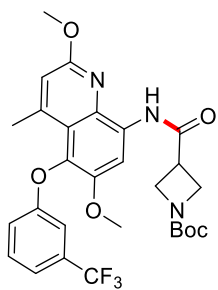

**31**

**$^{19}\text{F}$  NMR (376 MHz,  $\text{CDCl}_3$ )**

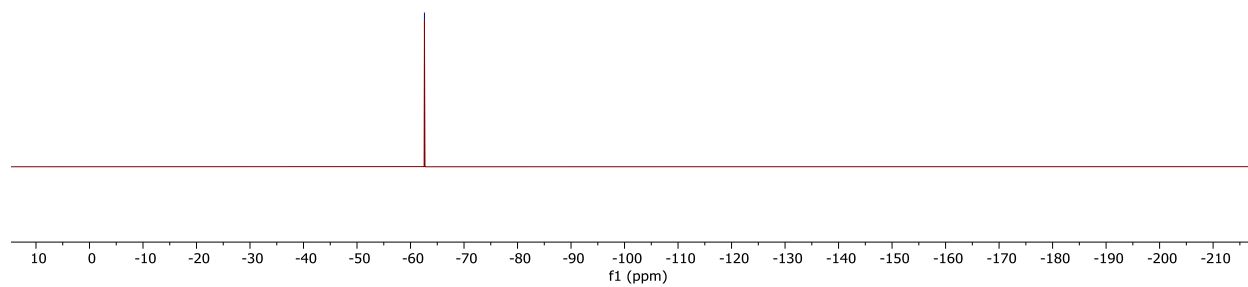

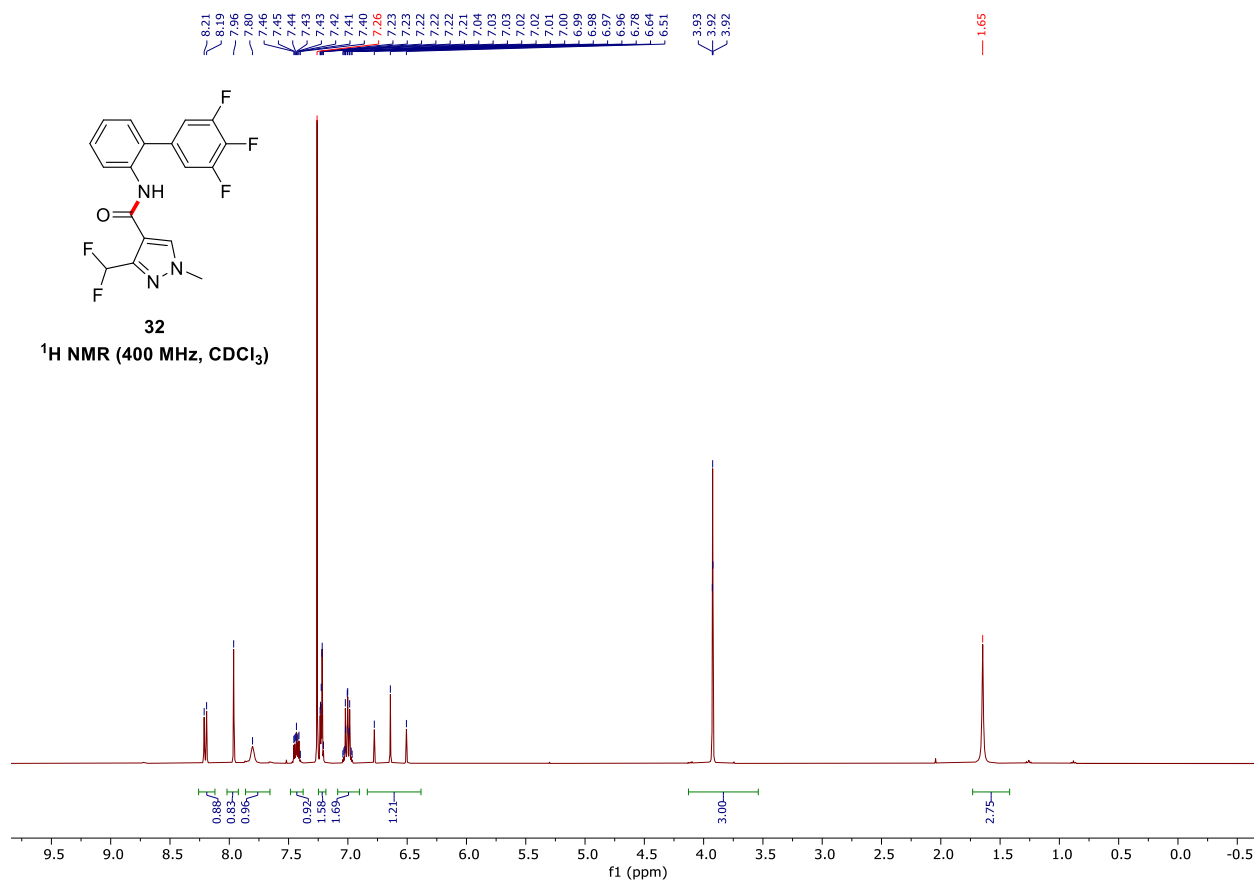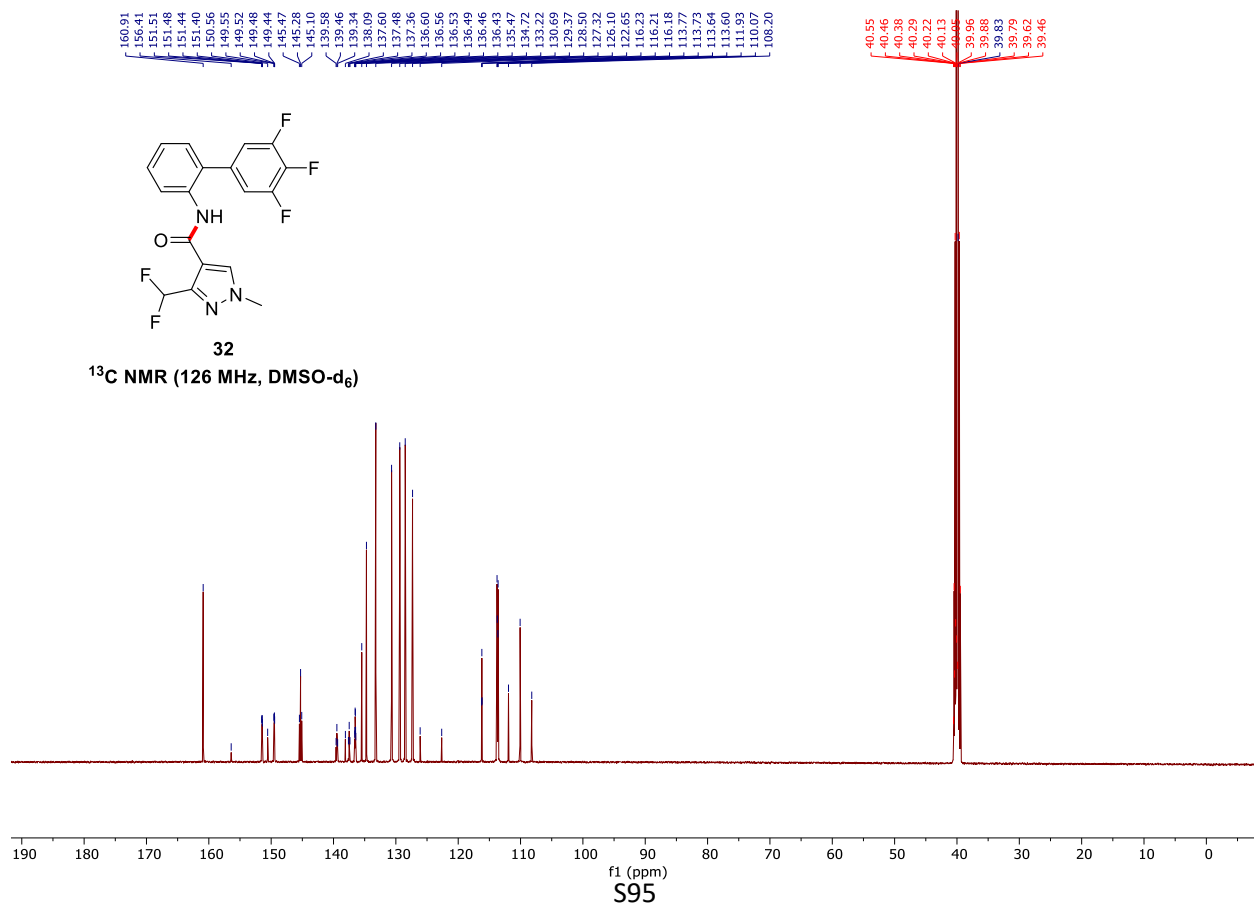

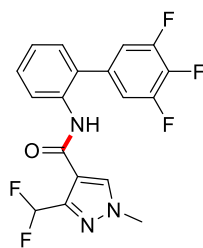

32

<sup>19</sup>F NMR (376 MHz, CDCl<sub>3</sub>)

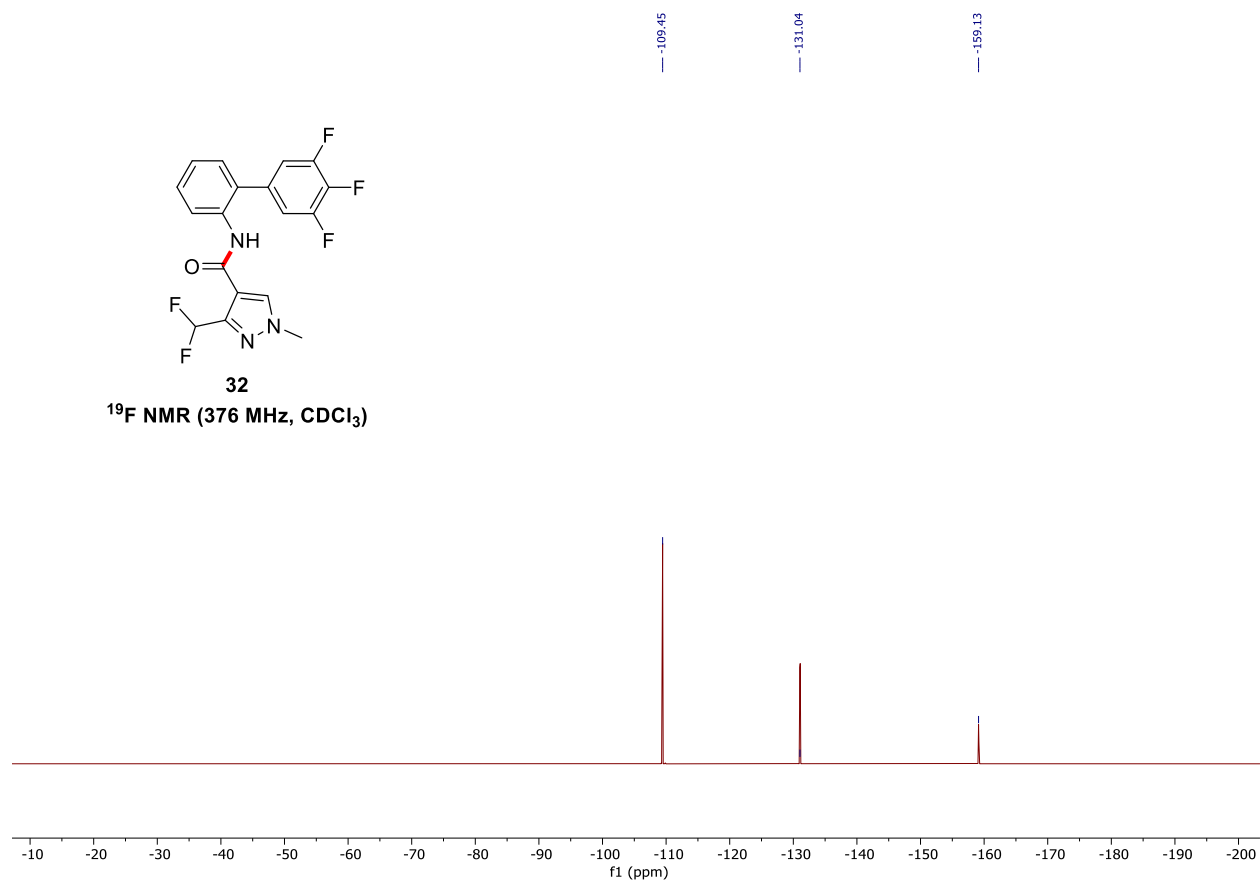

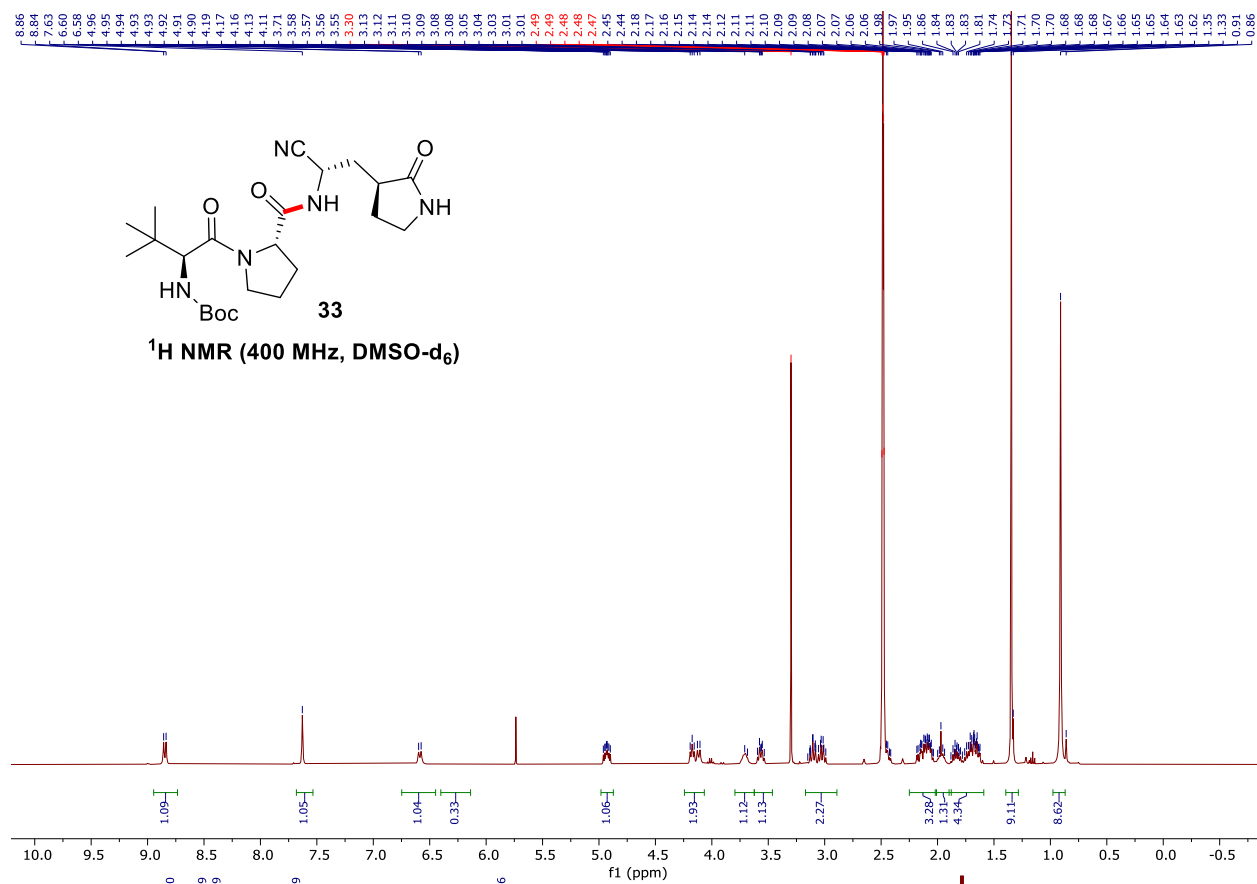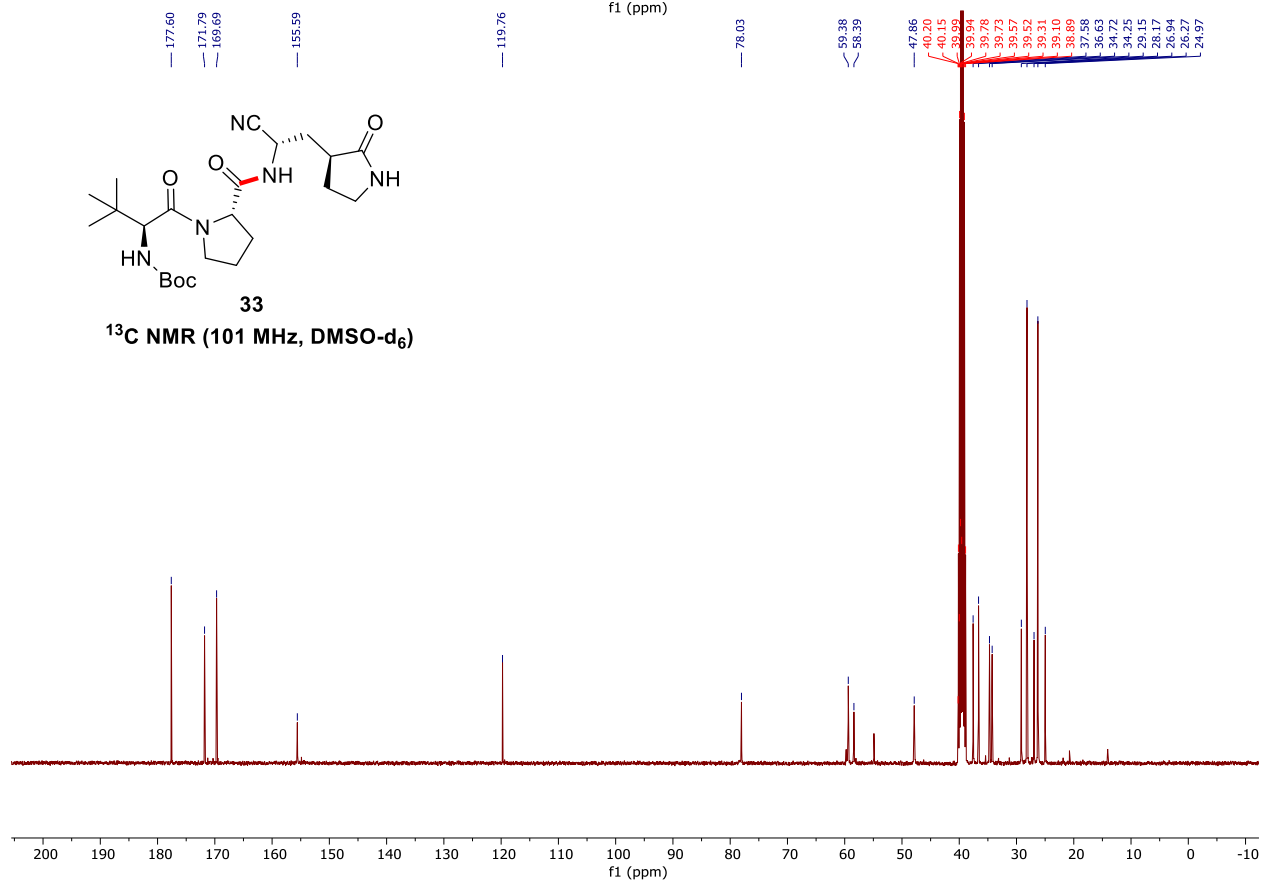

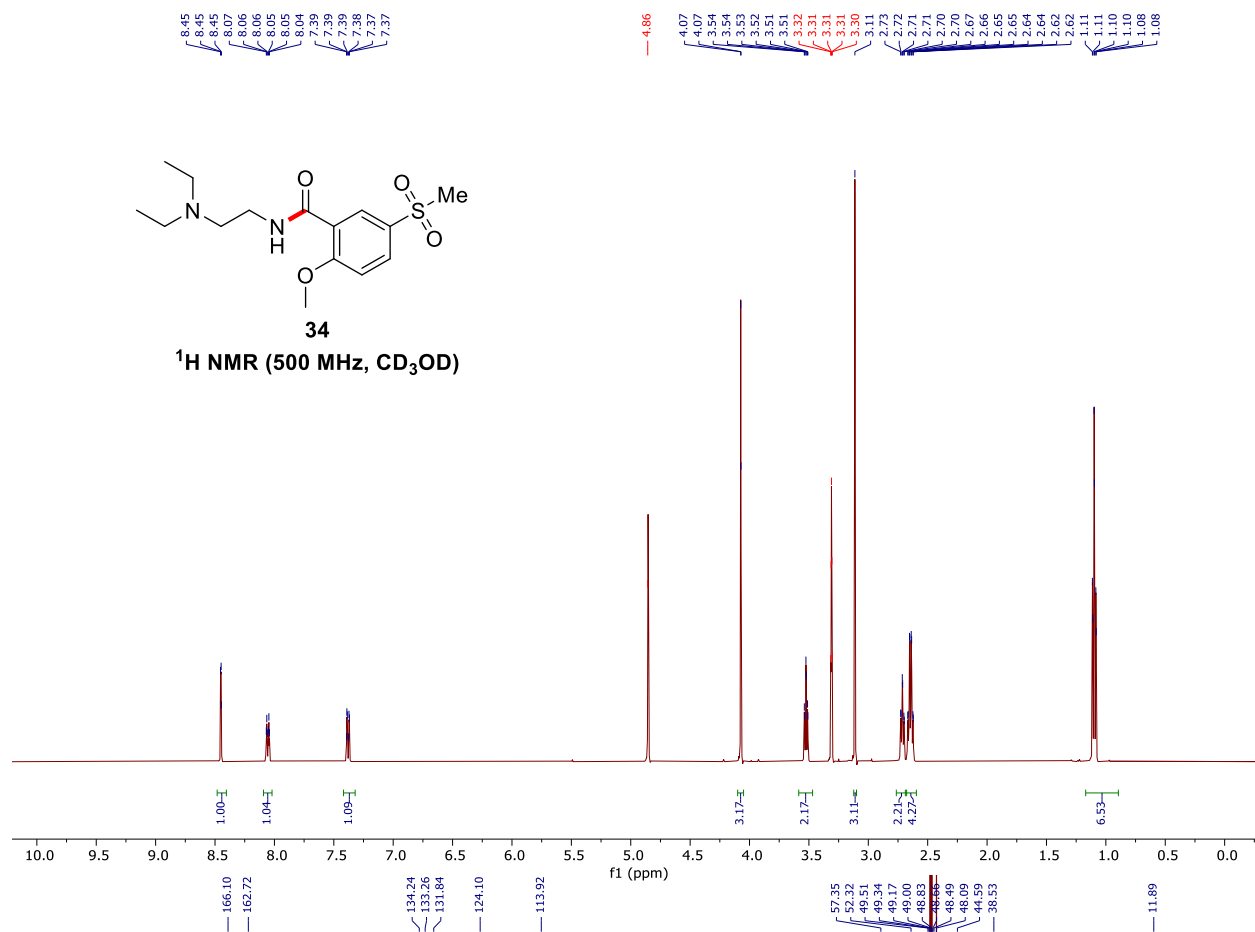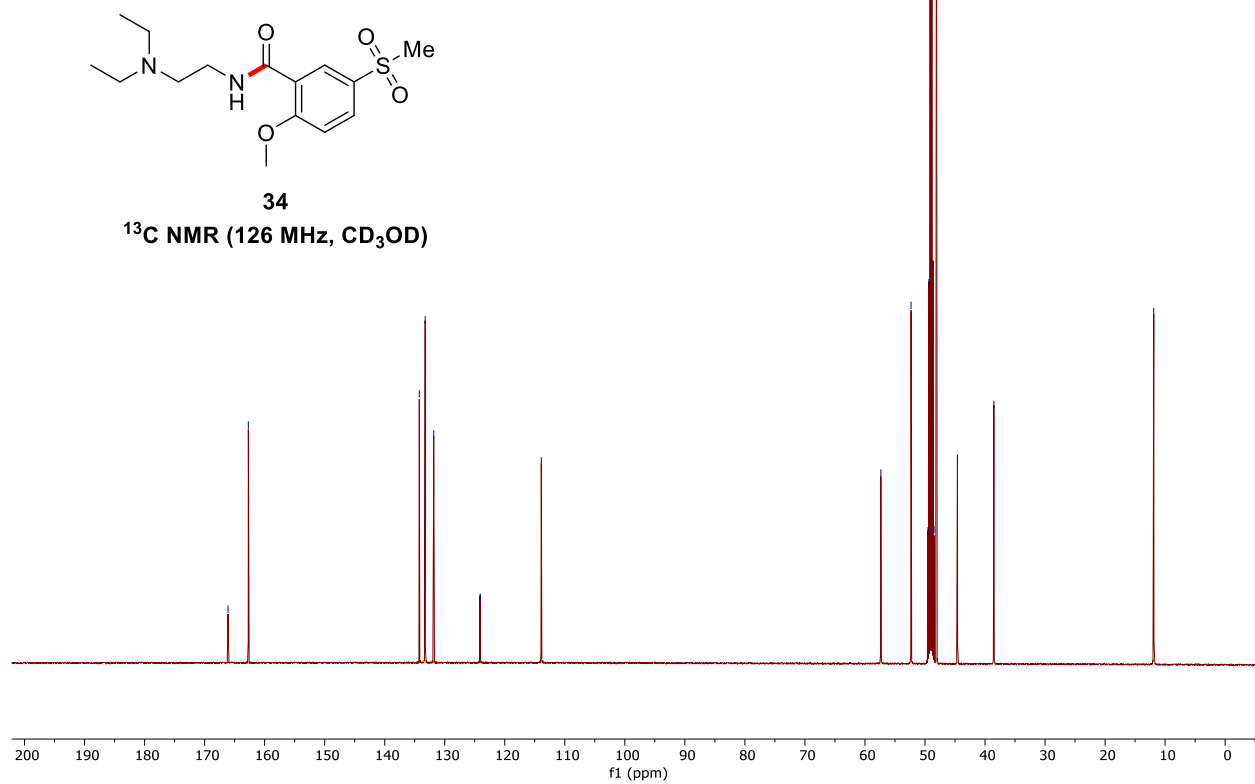

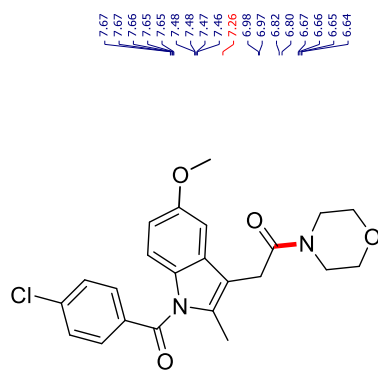

**35**

**<sup>1</sup>H NMR (400 MHz, CDCl<sub>3</sub>)**

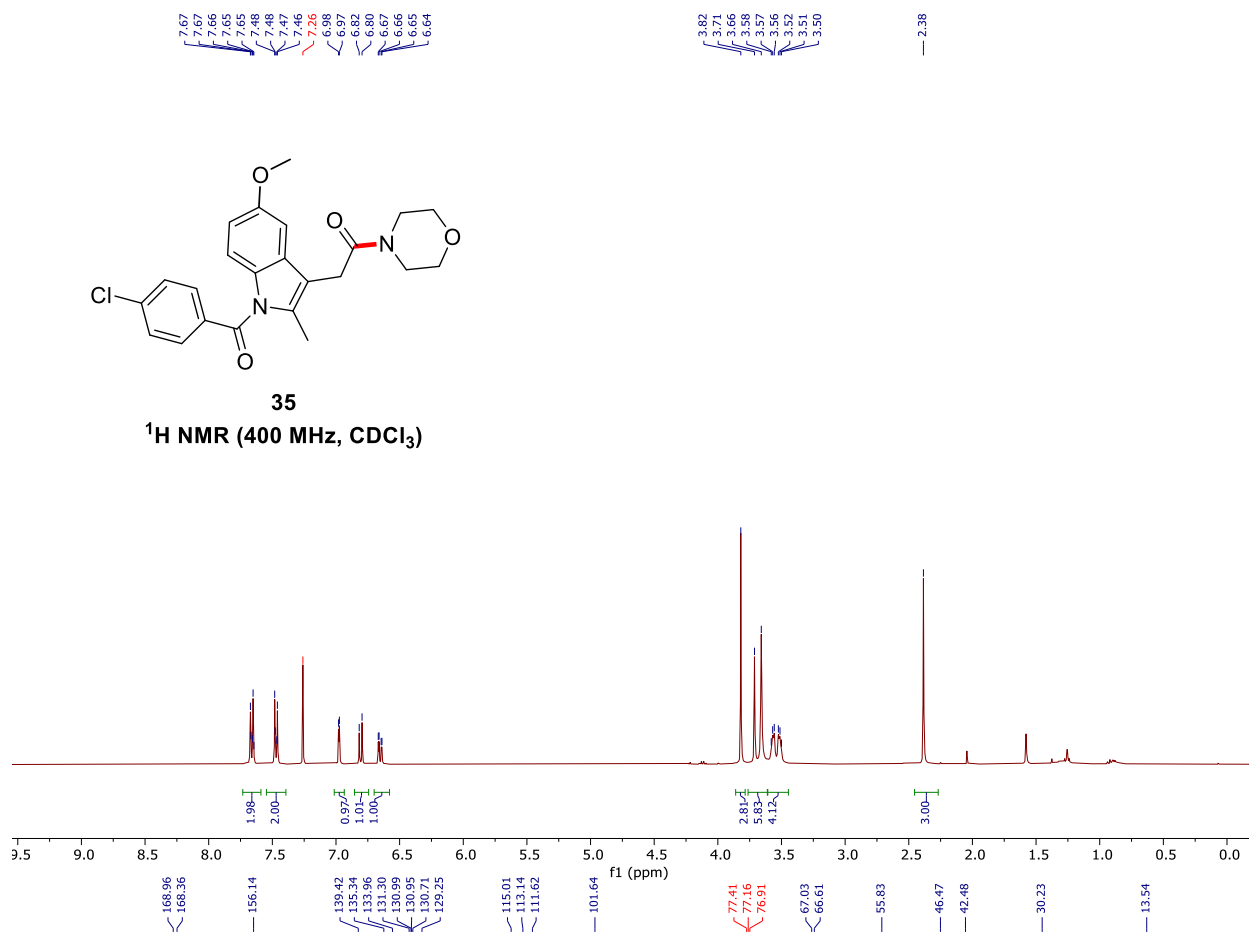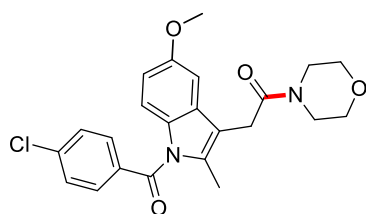

**35**

**<sup>13</sup>C NMR (126 MHz, CDCl<sub>3</sub>)**

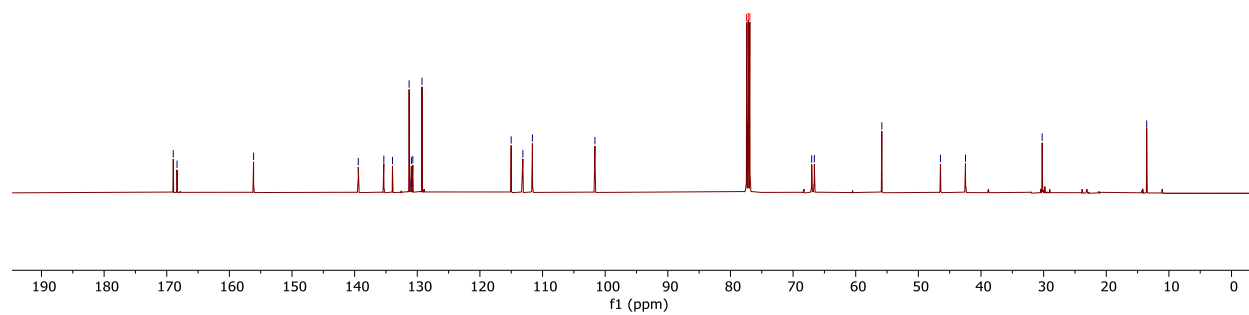

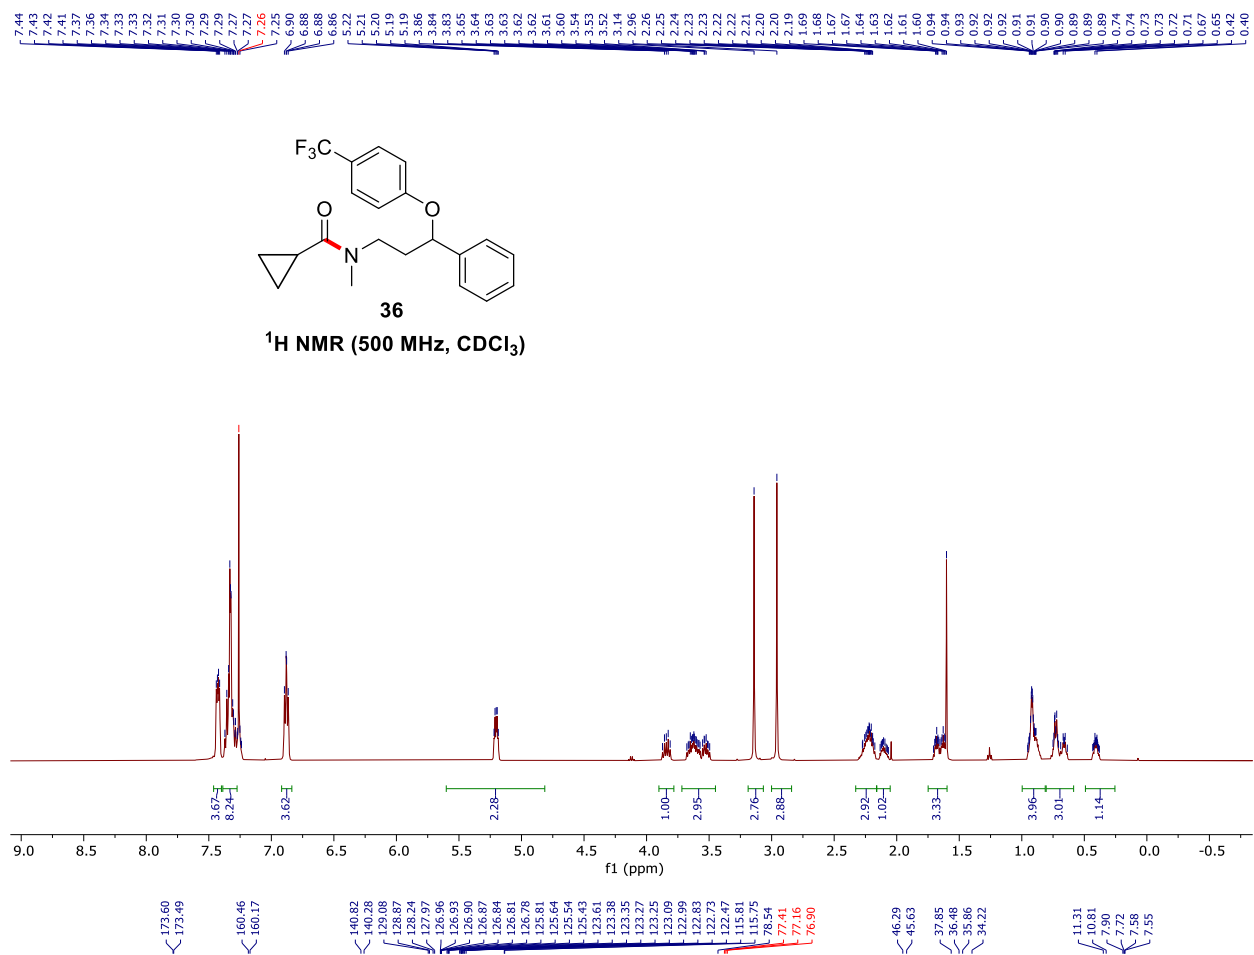

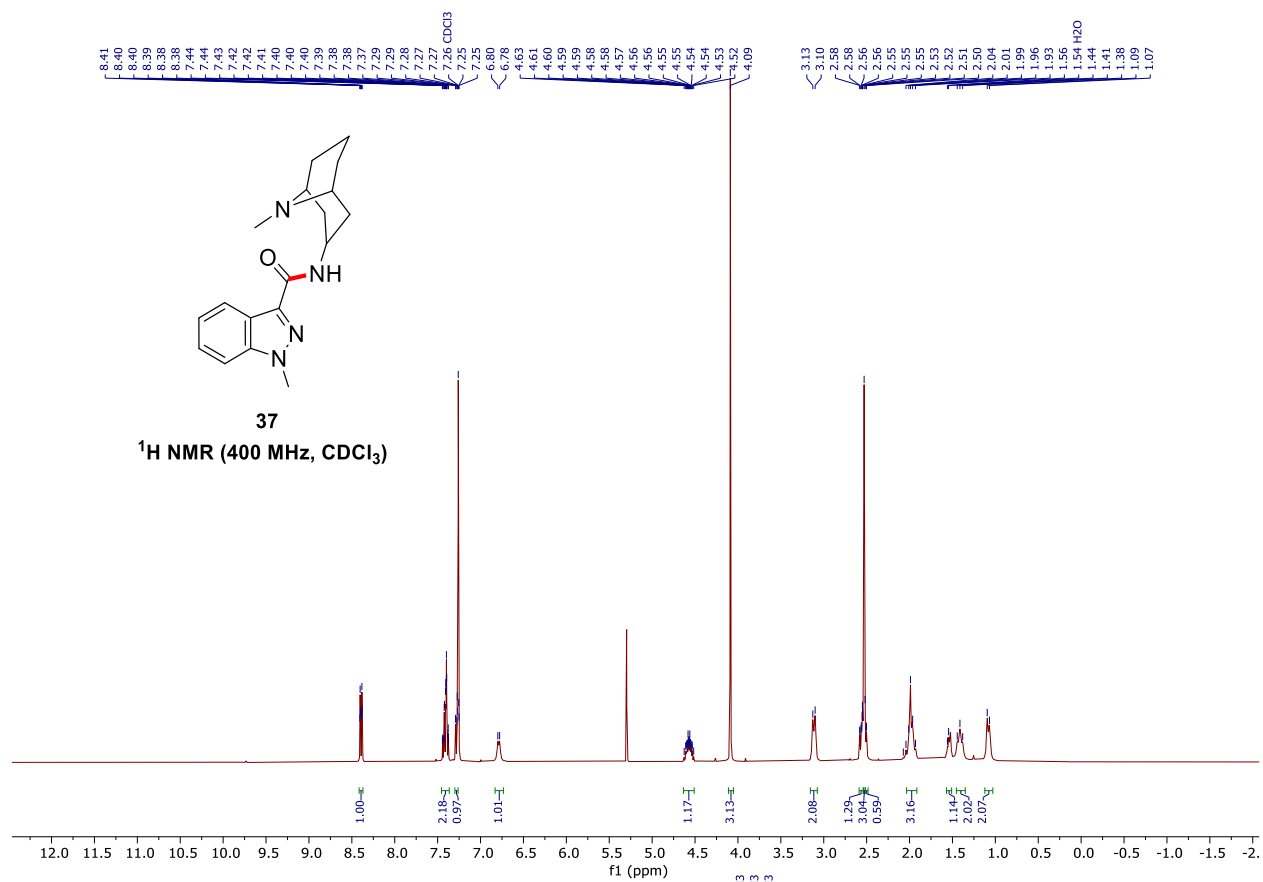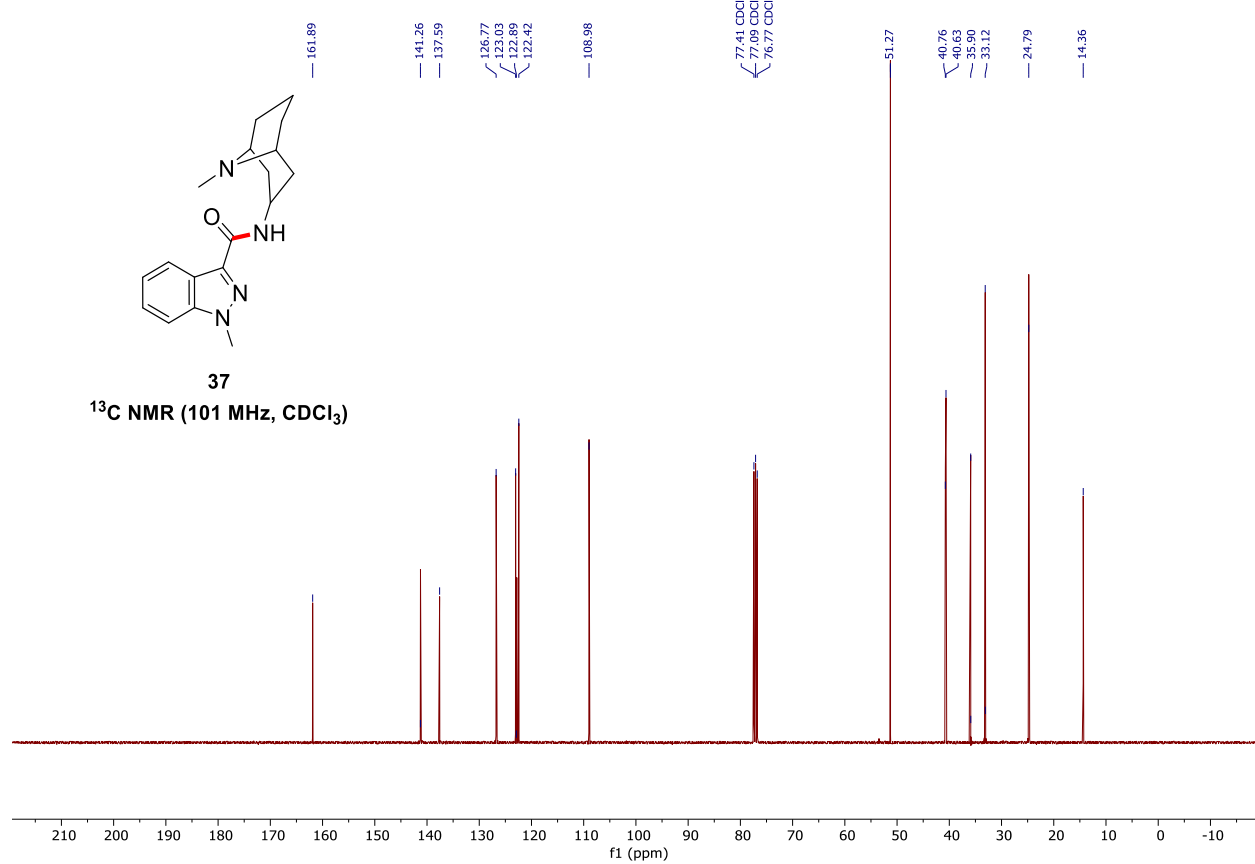

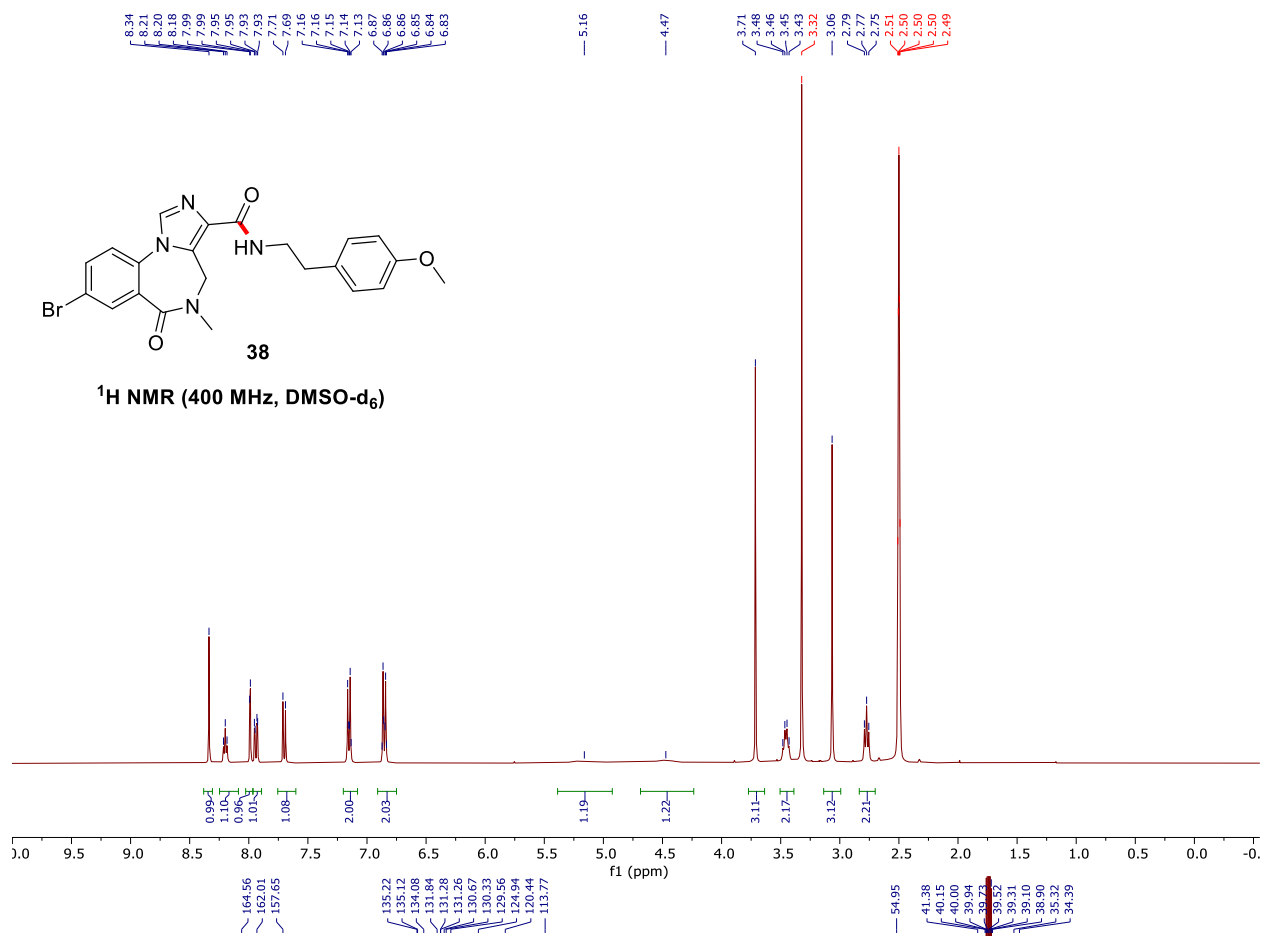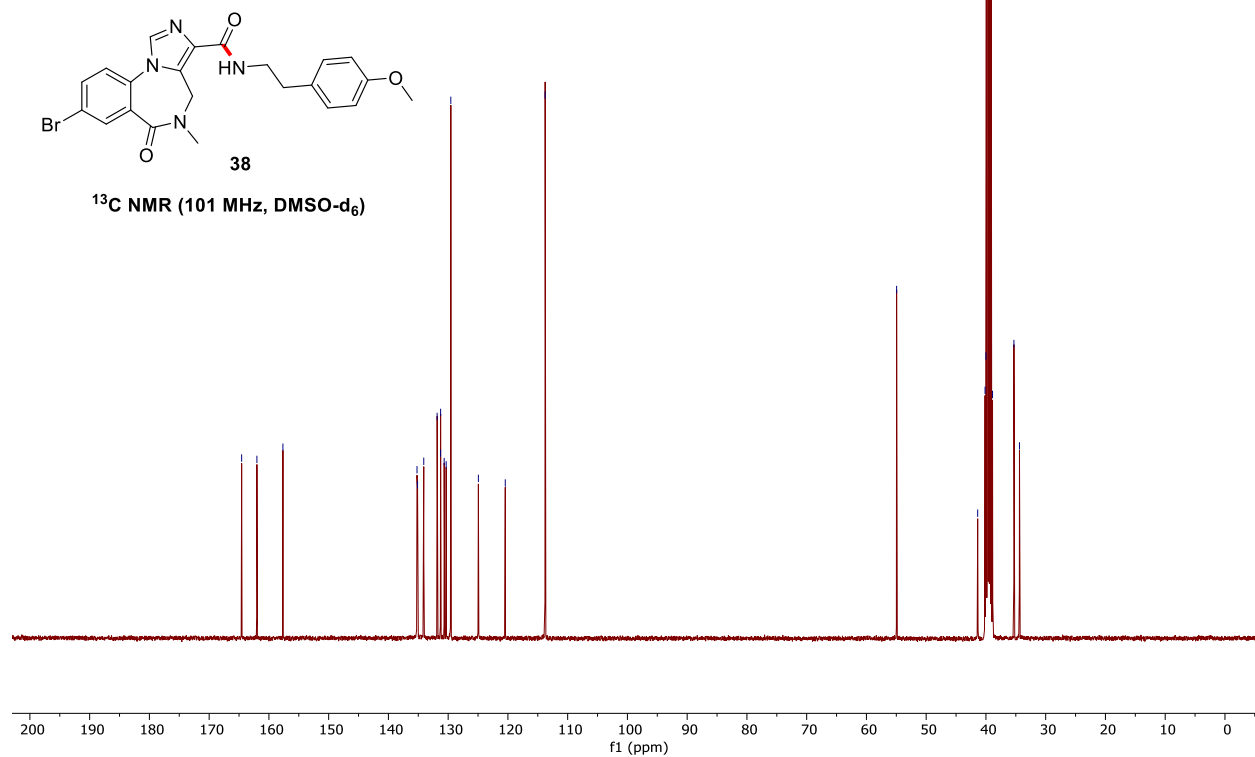

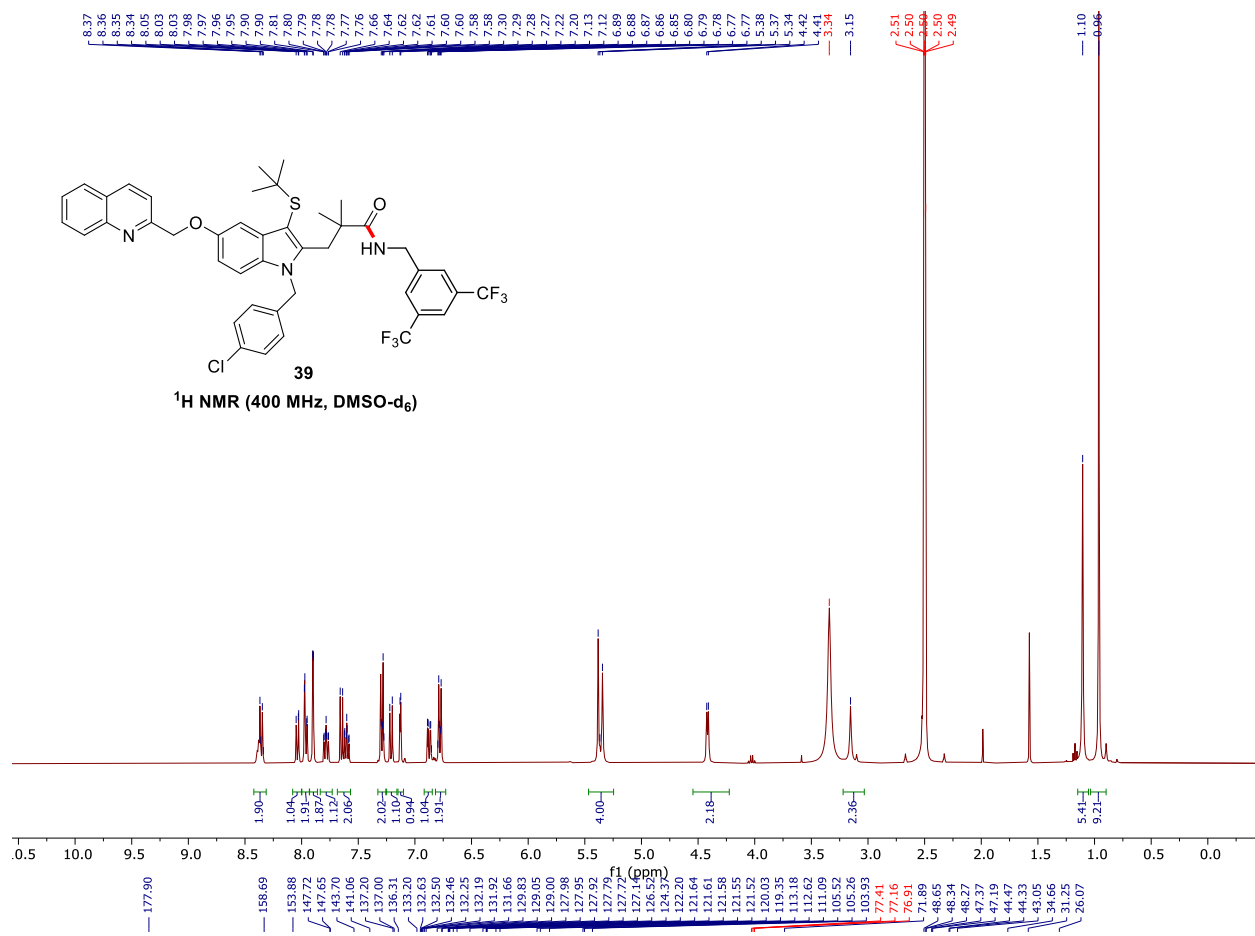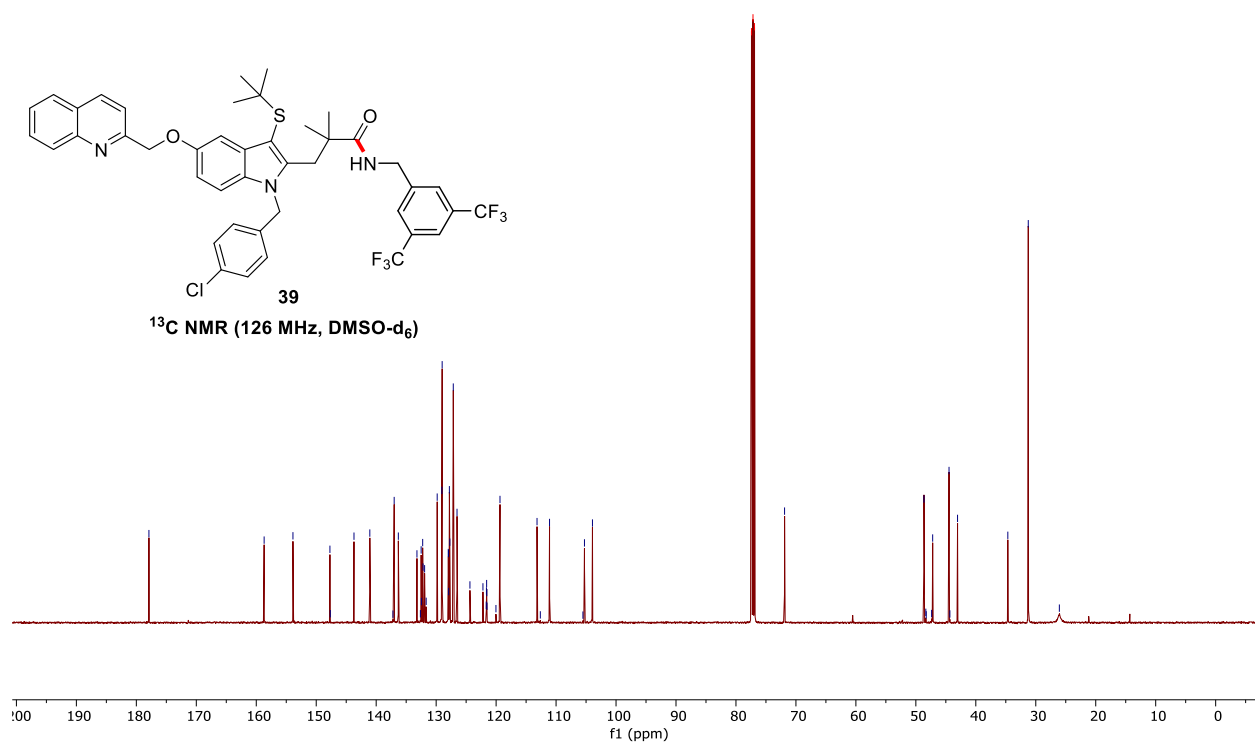

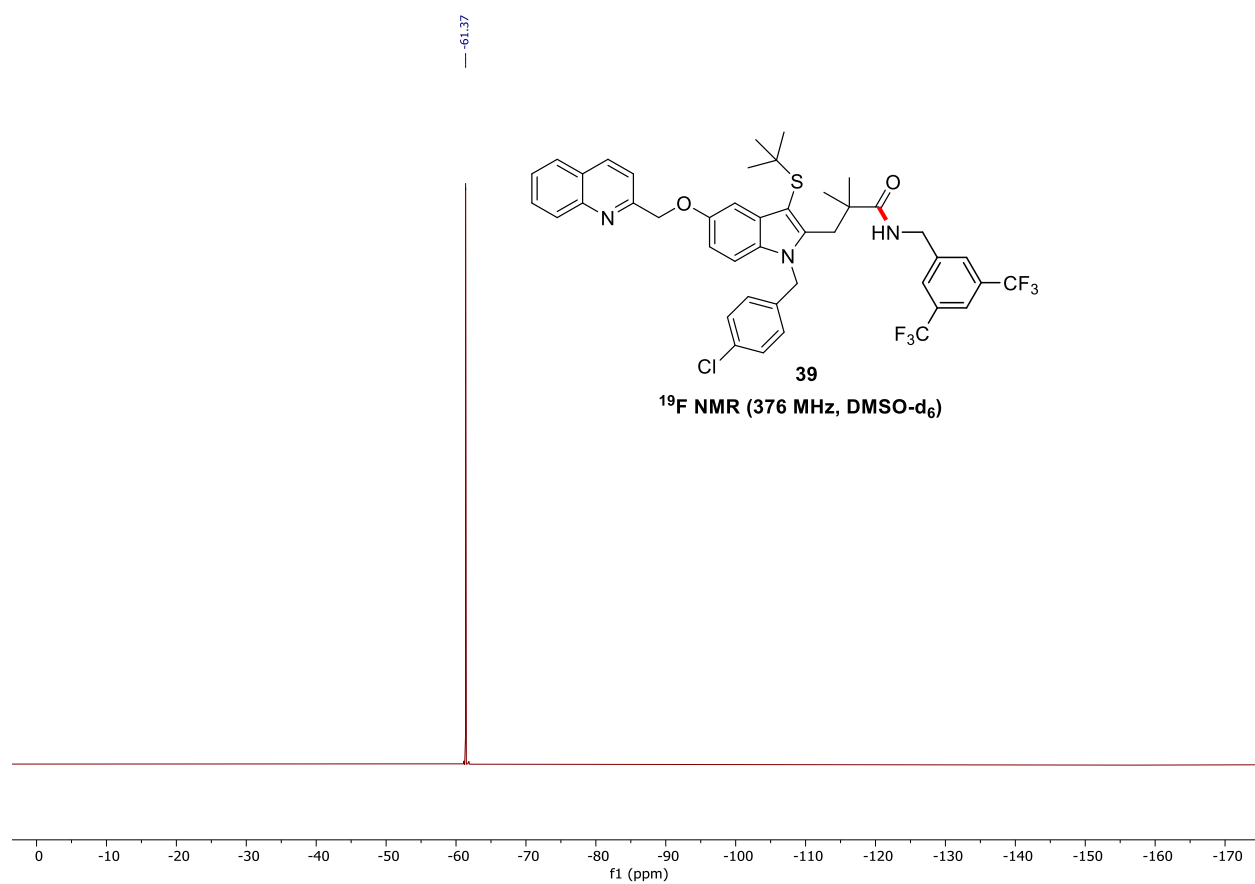

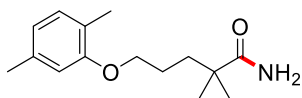

40

<sup>1</sup>H NMR (500 MHz, DMSO-*d*<sub>6</sub>)

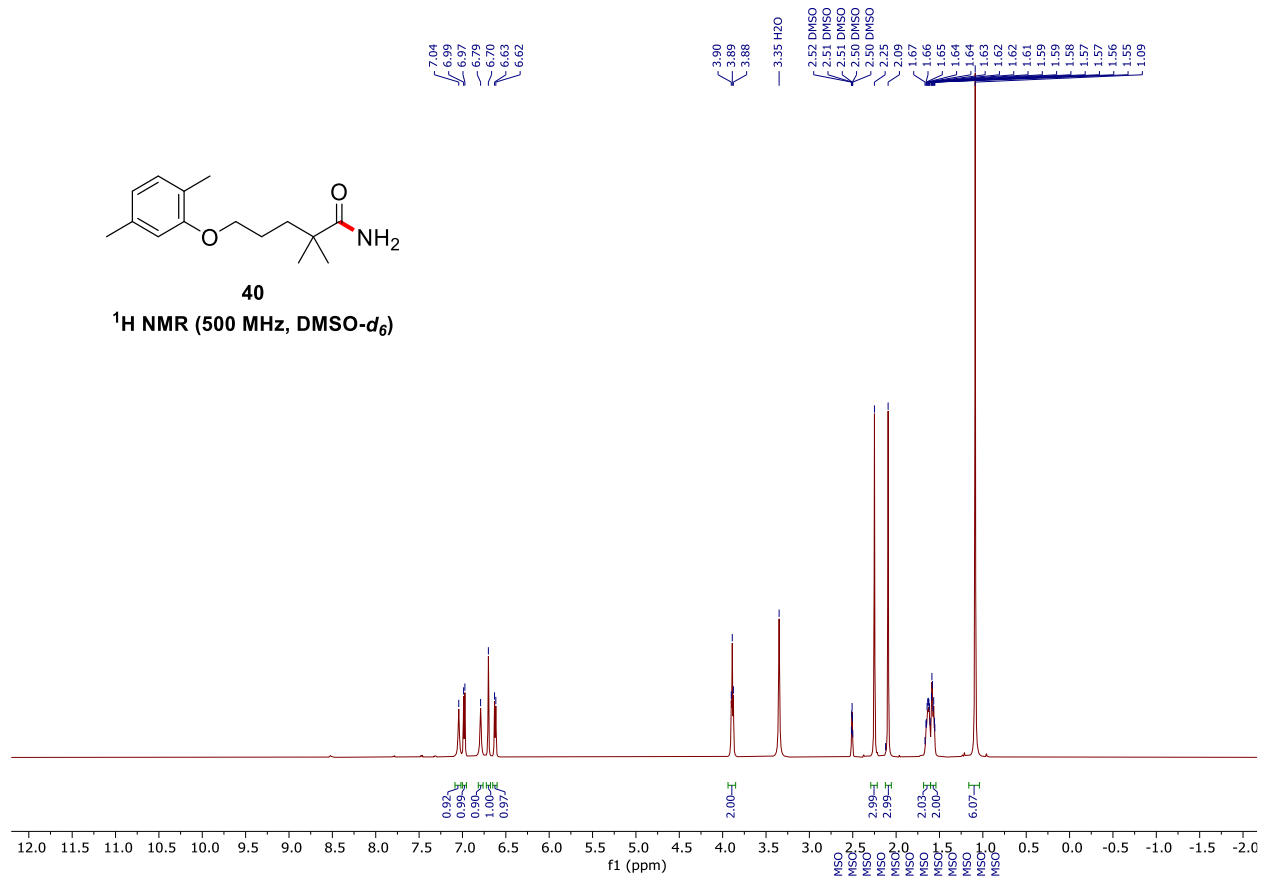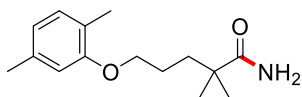

40

<sup>13</sup>C NMR (126 MHz, DMSO-*d*<sub>6</sub>)

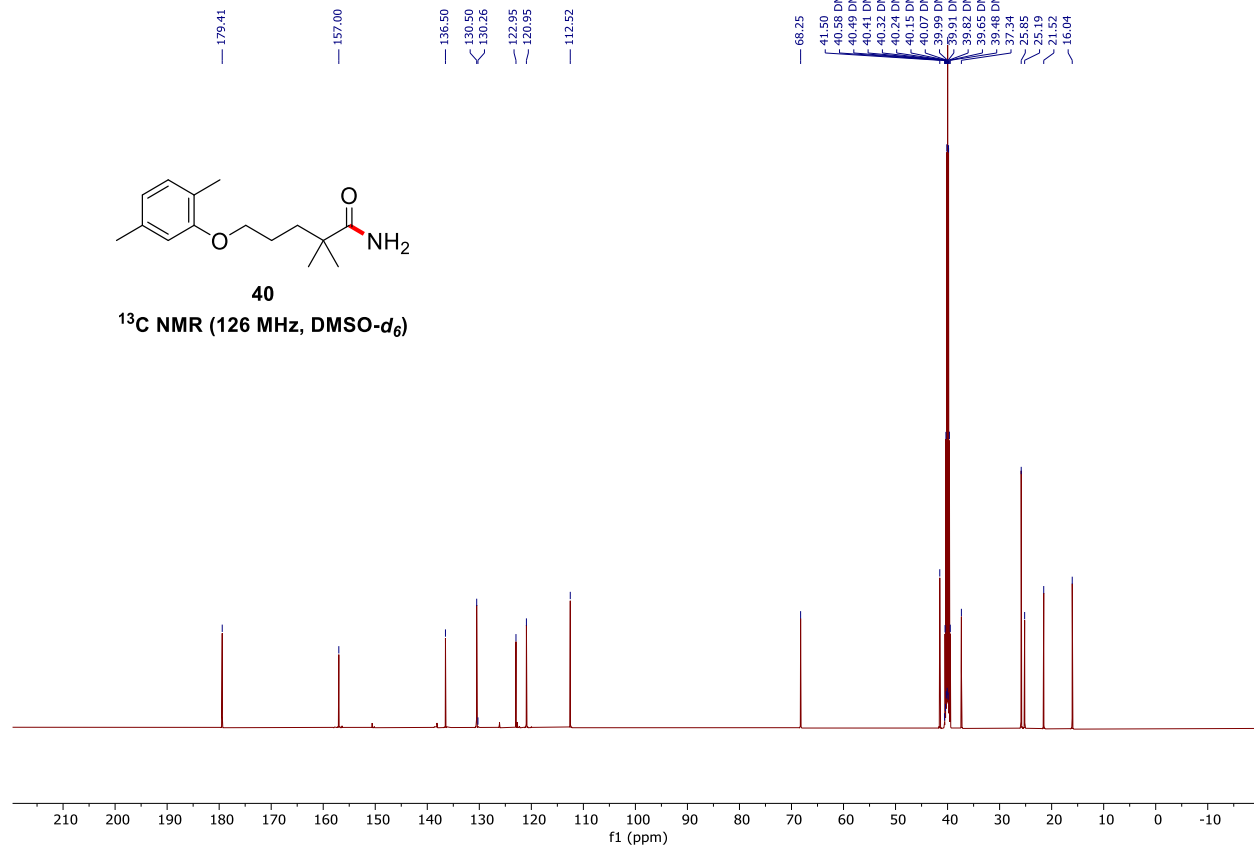

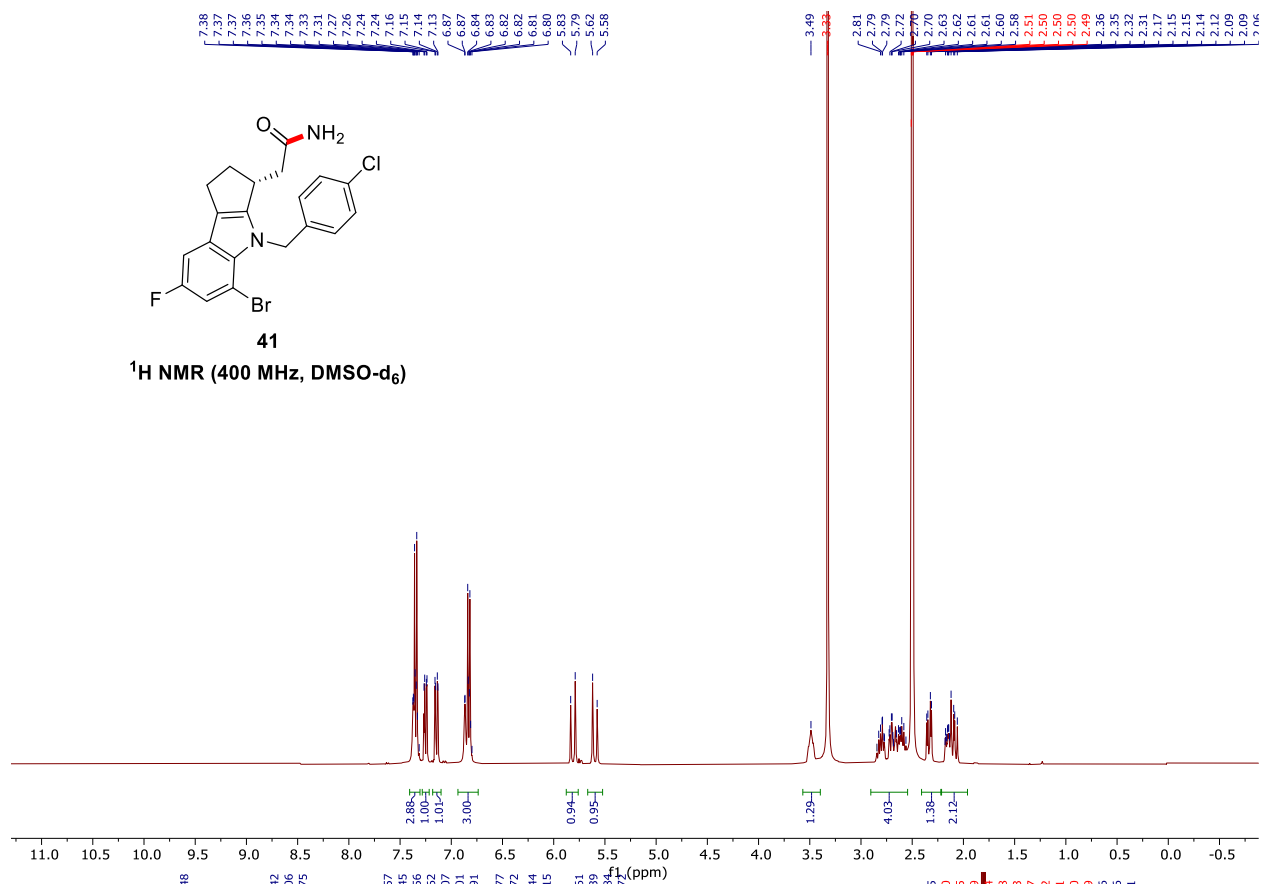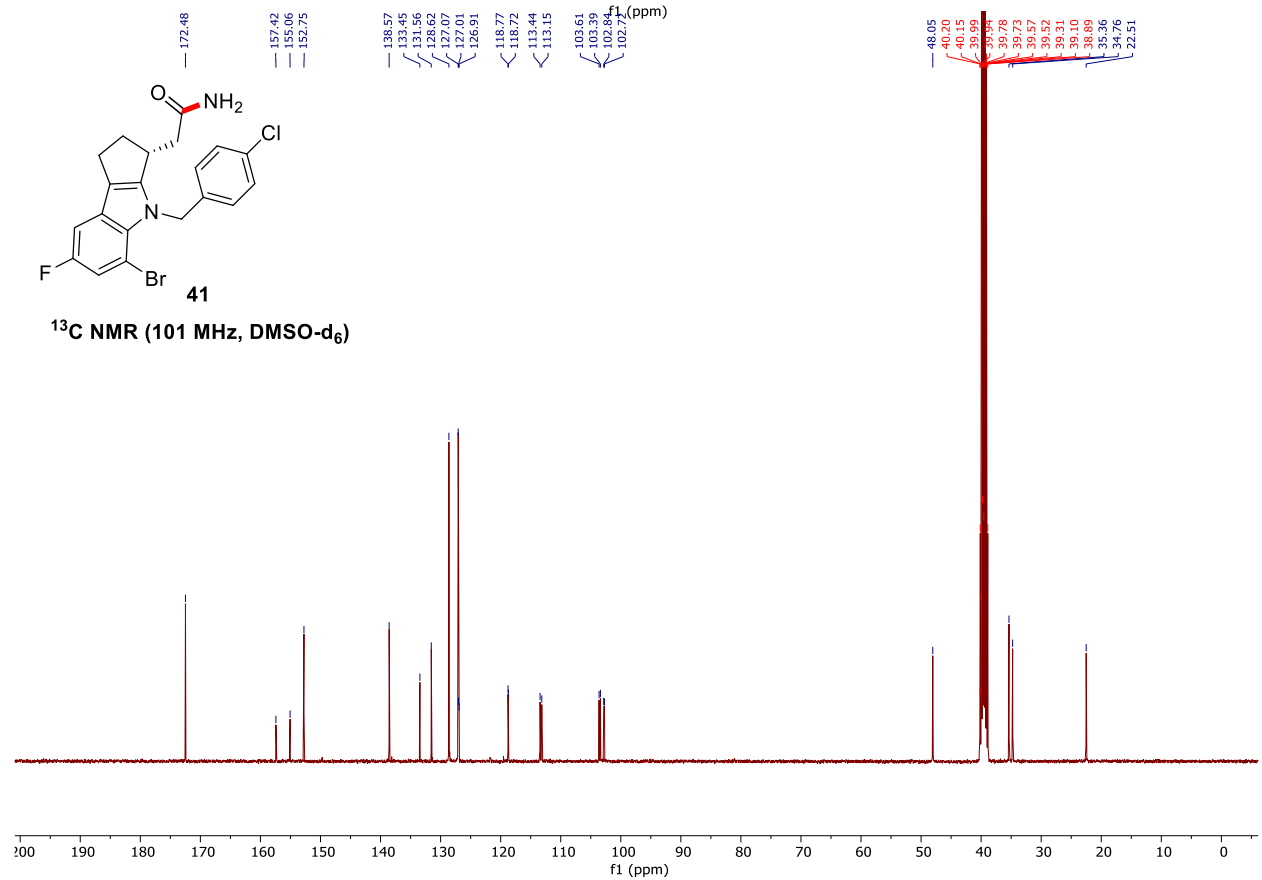

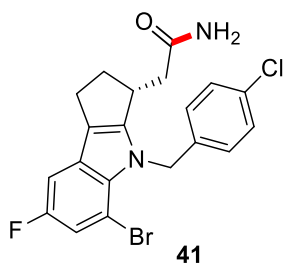

**$^{19}\text{F}$  NMR (376 MHz, DMSO- $\text{d}_6$ )**

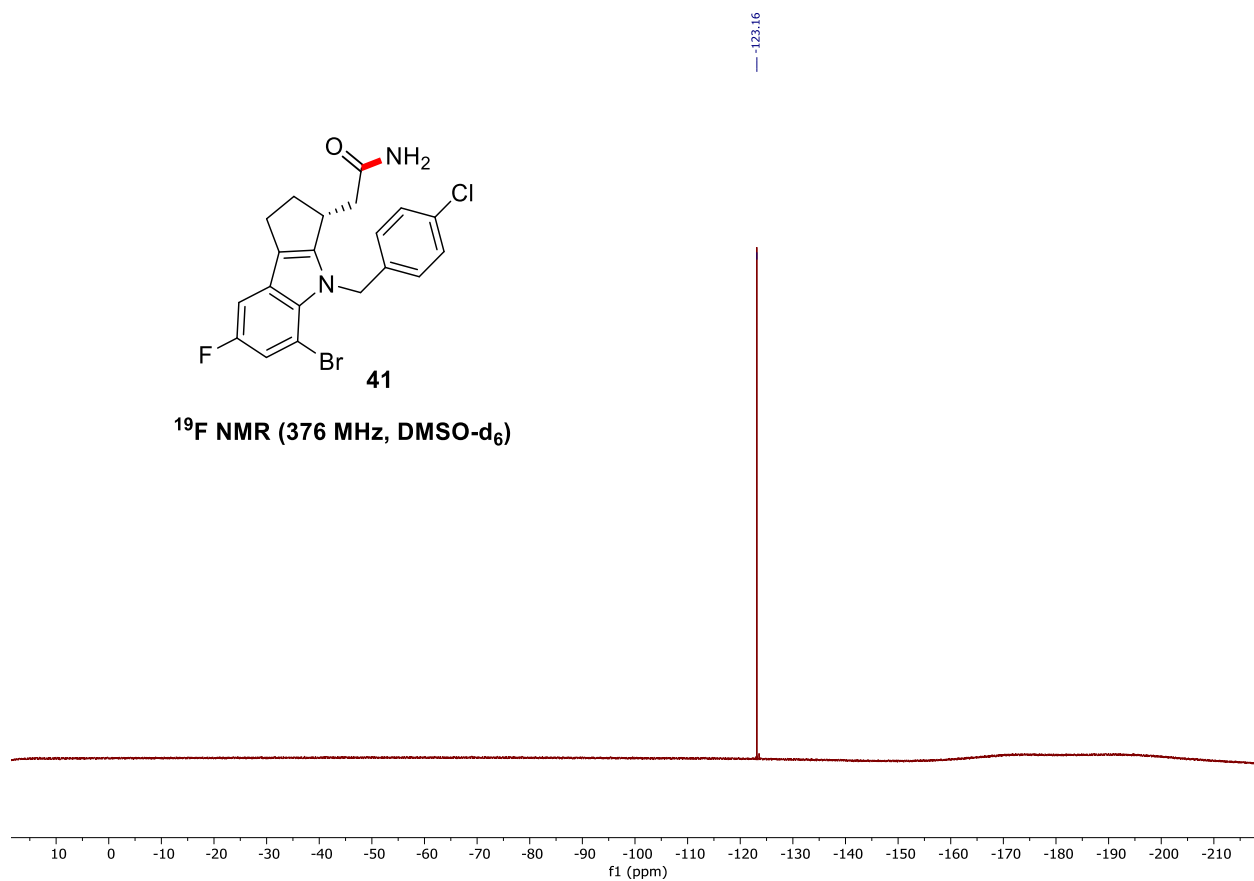

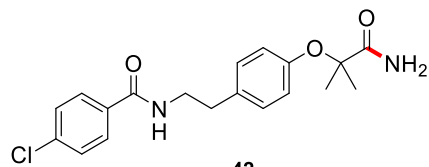

<sup>1</sup>H NMR (500 MHz, DMSO-d<sub>6</sub>)

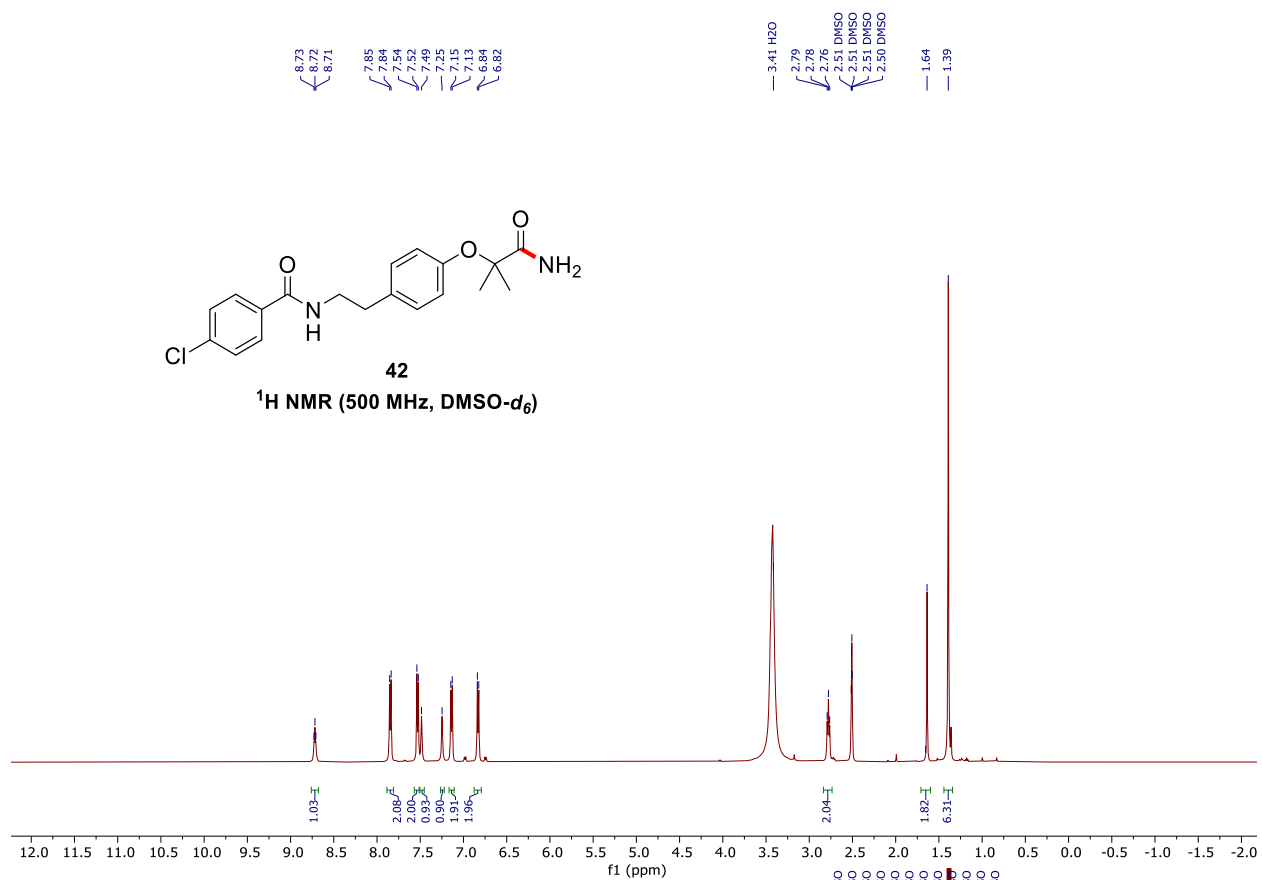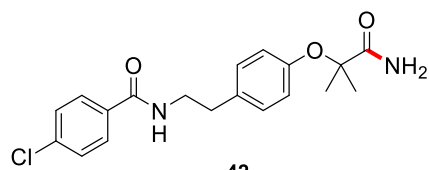

<sup>13</sup>C NMR (126 MHz, DMSO-d<sub>6</sub>)

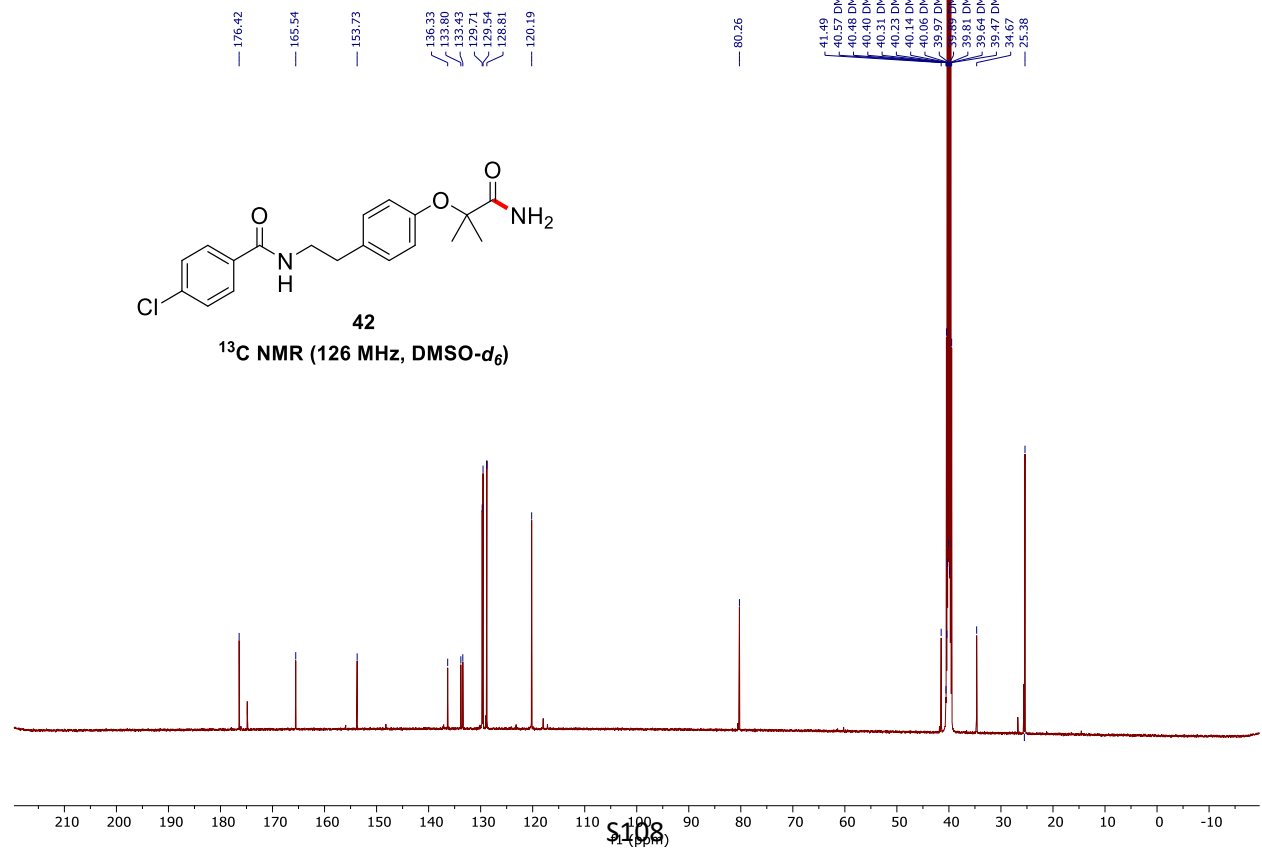

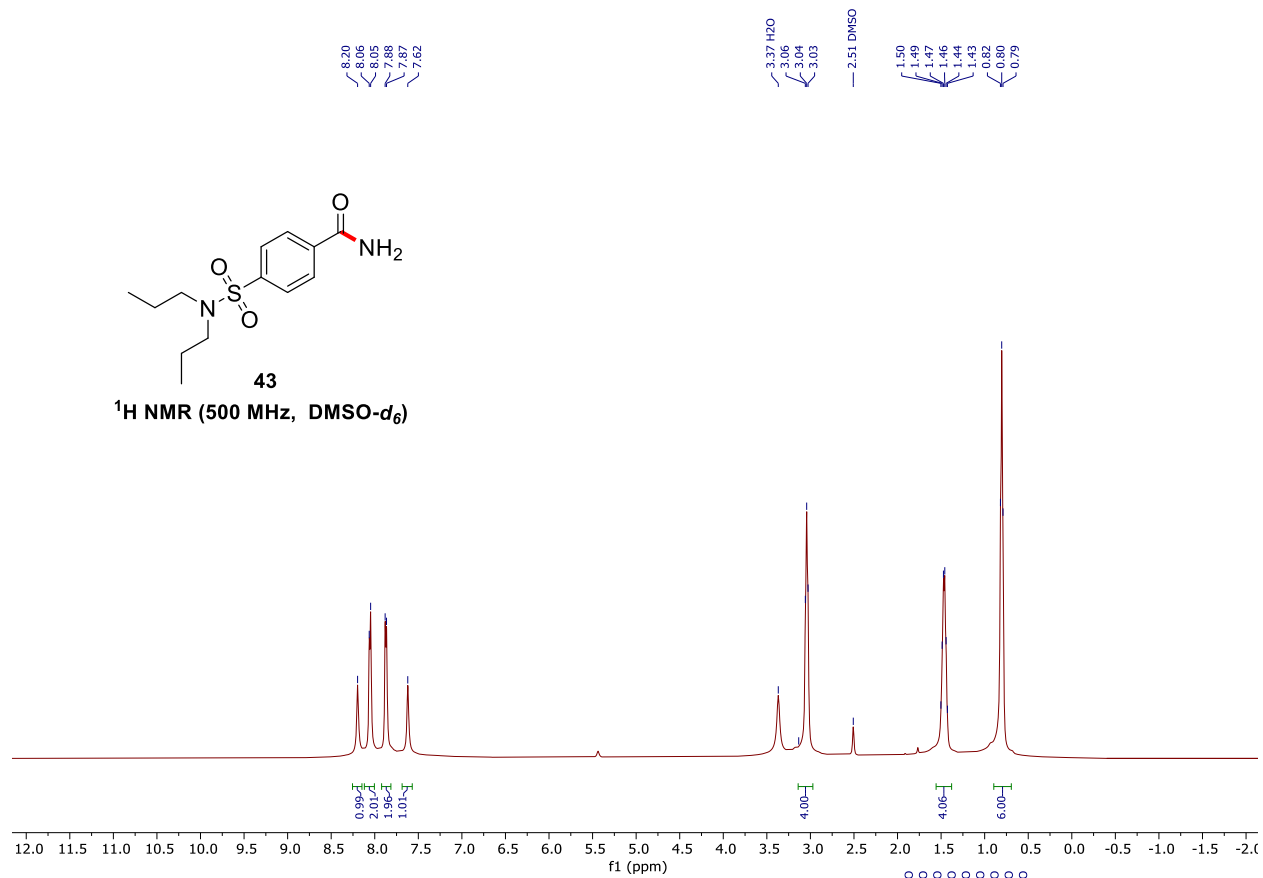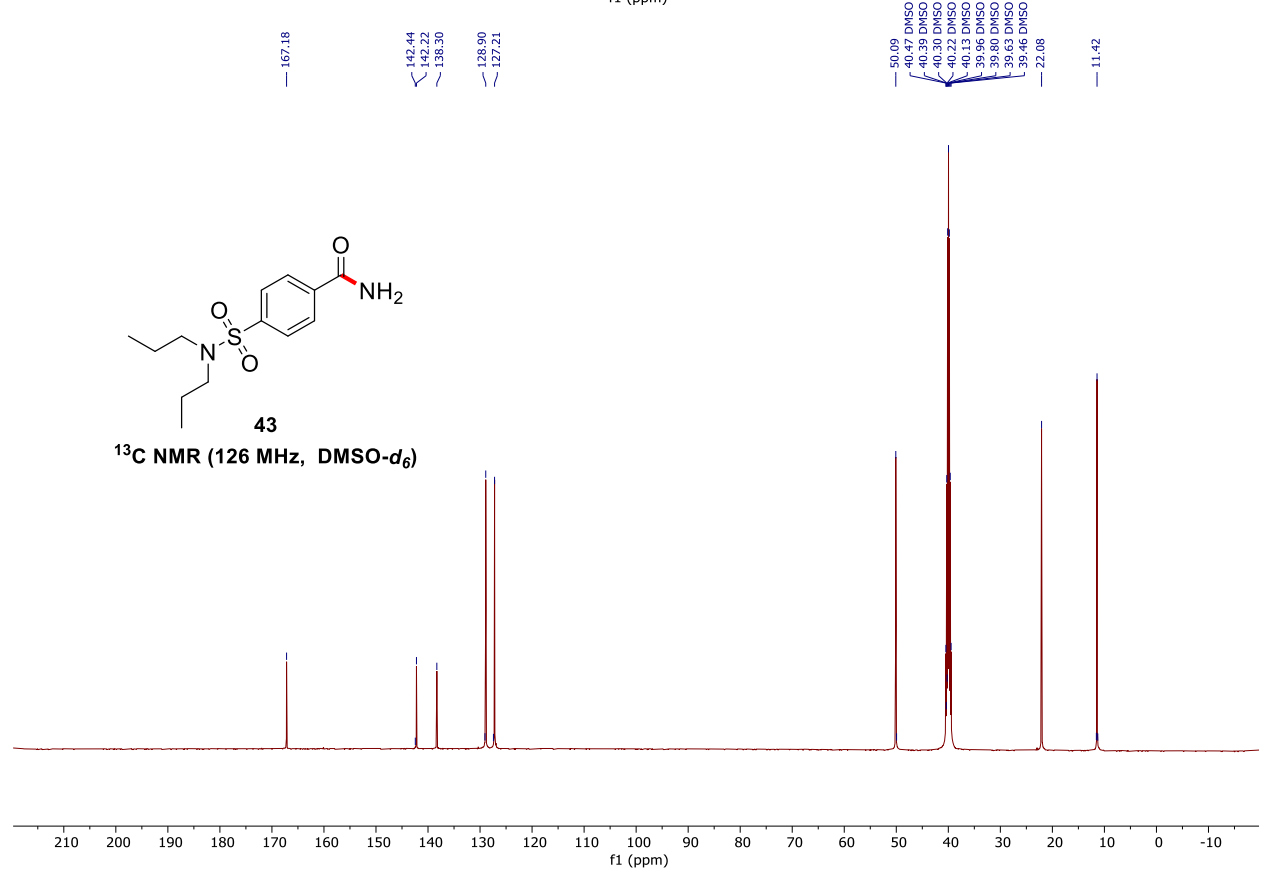

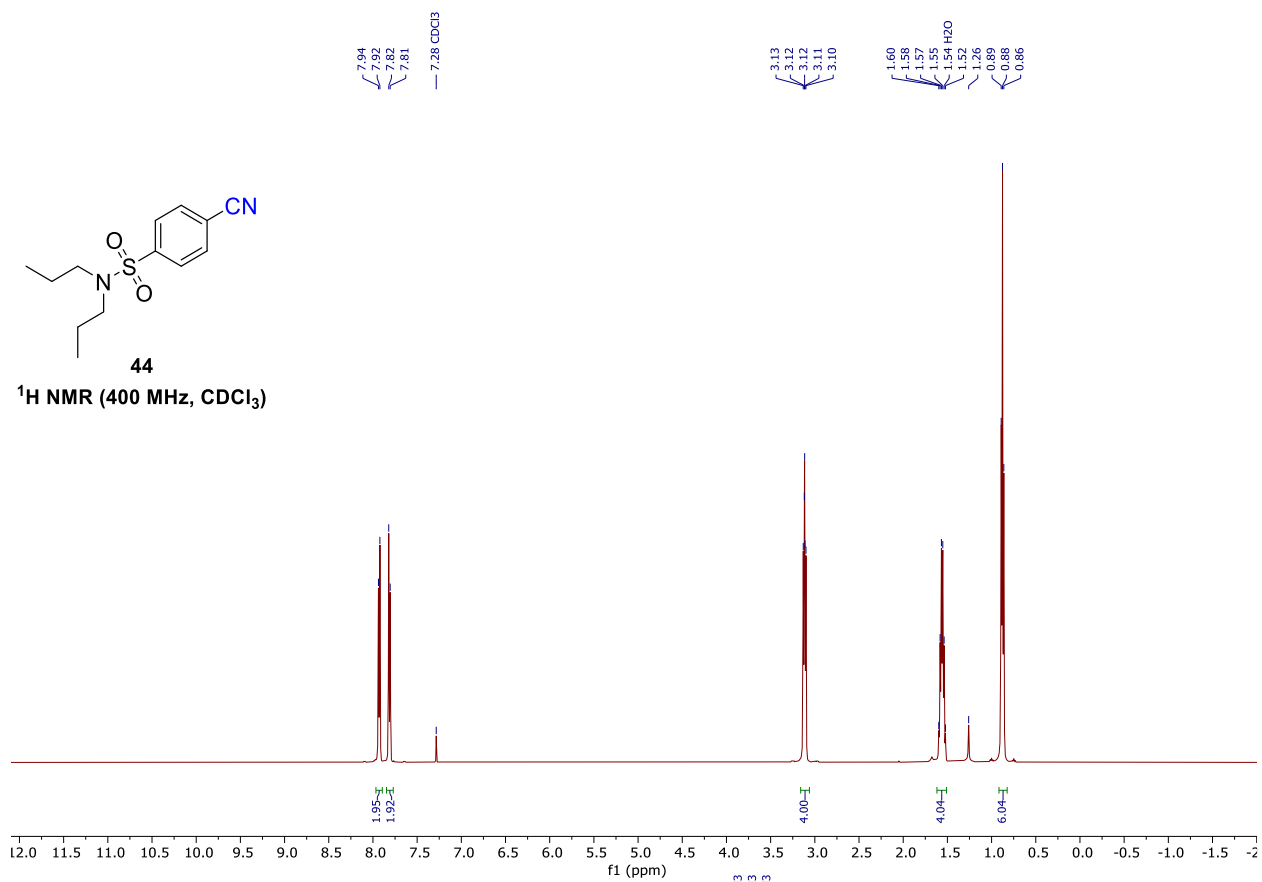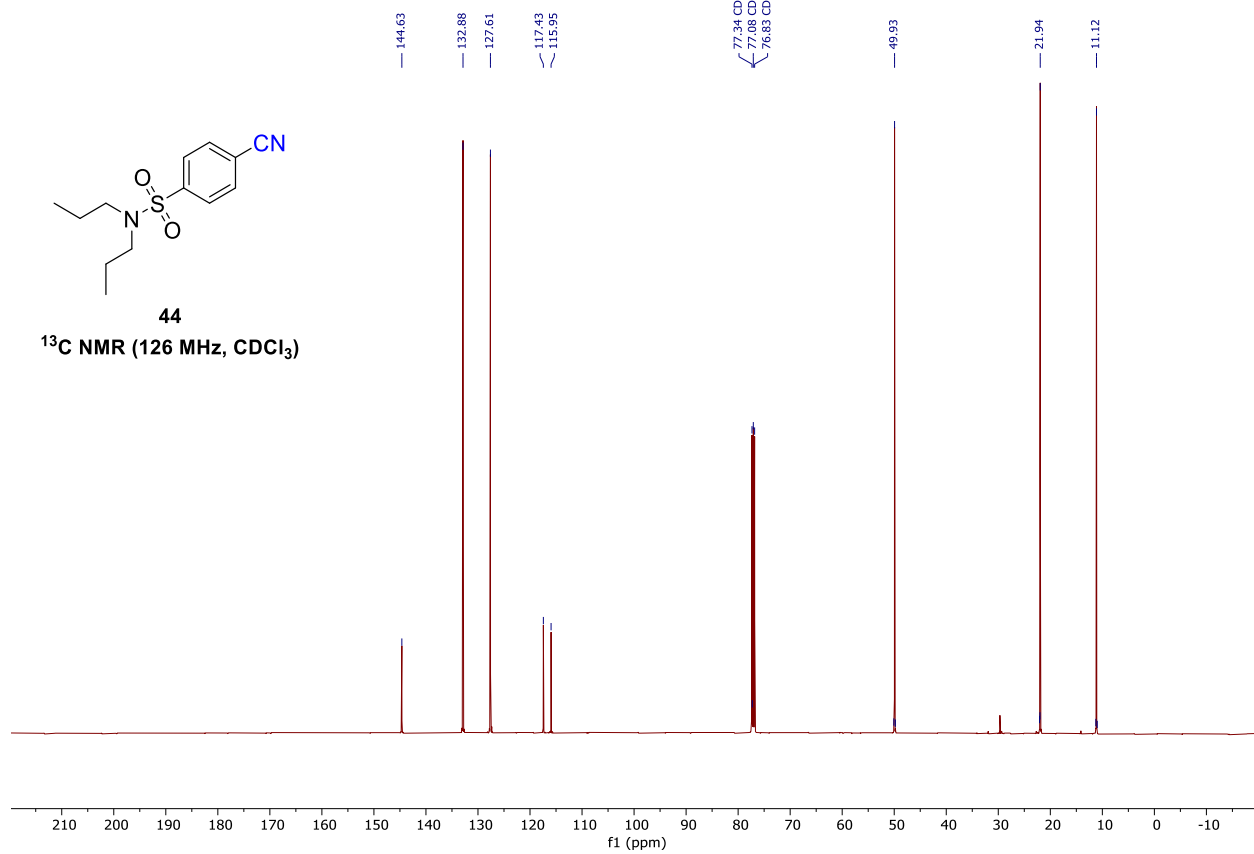

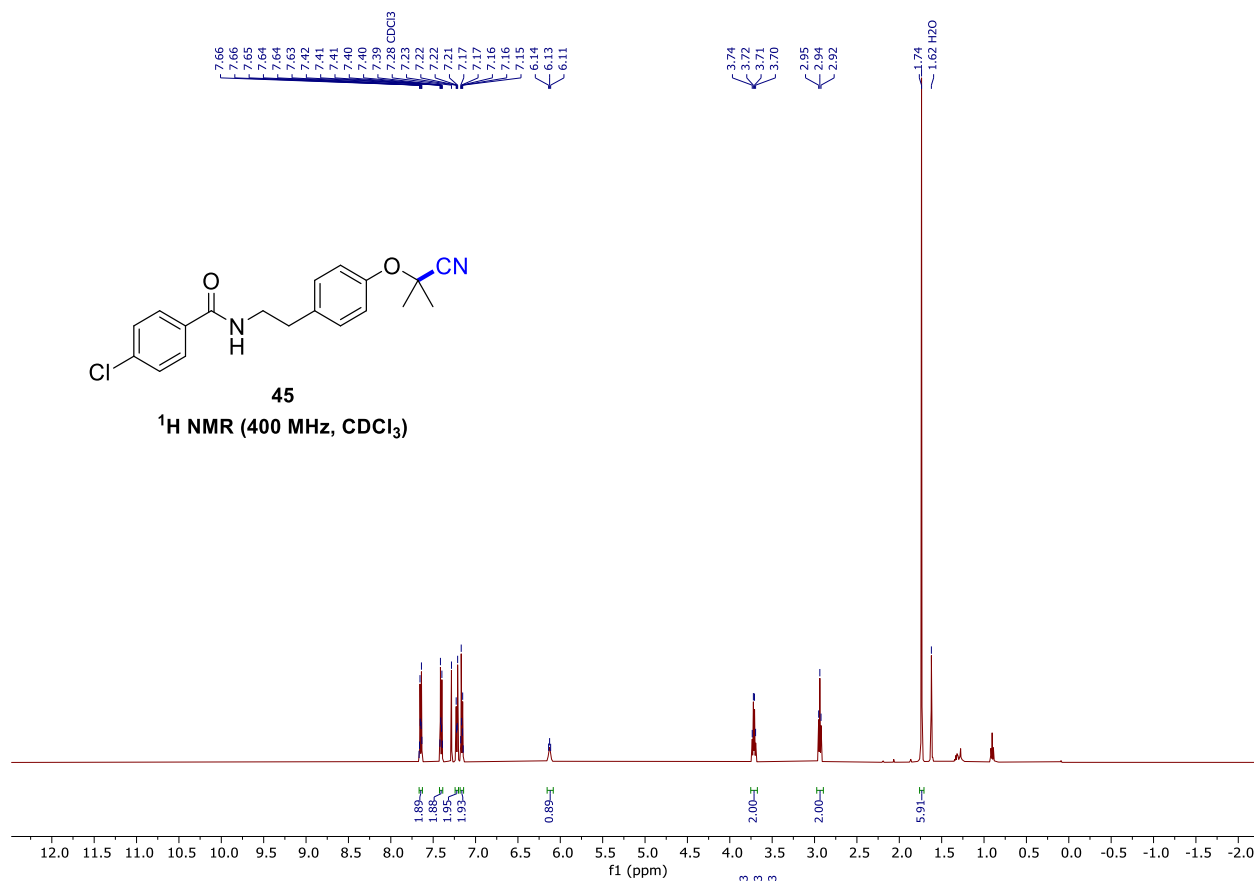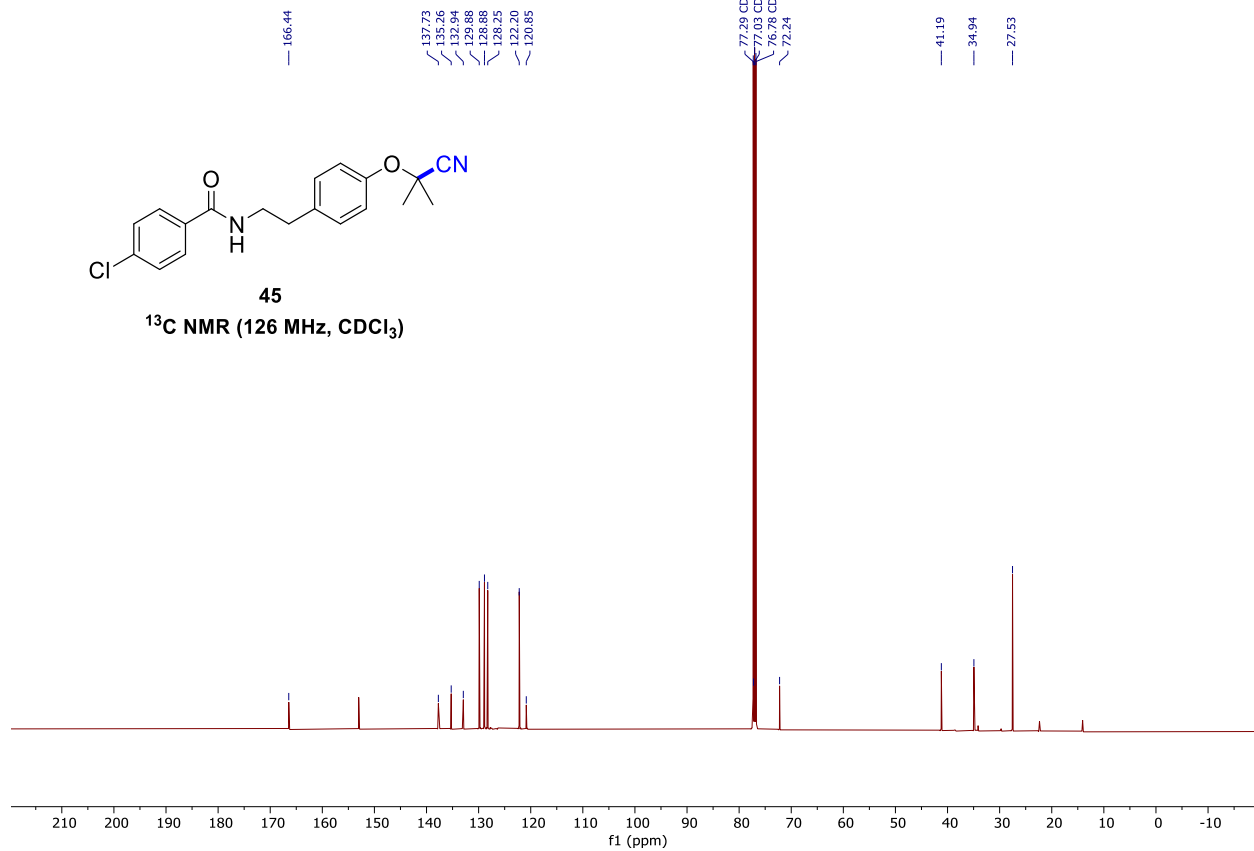

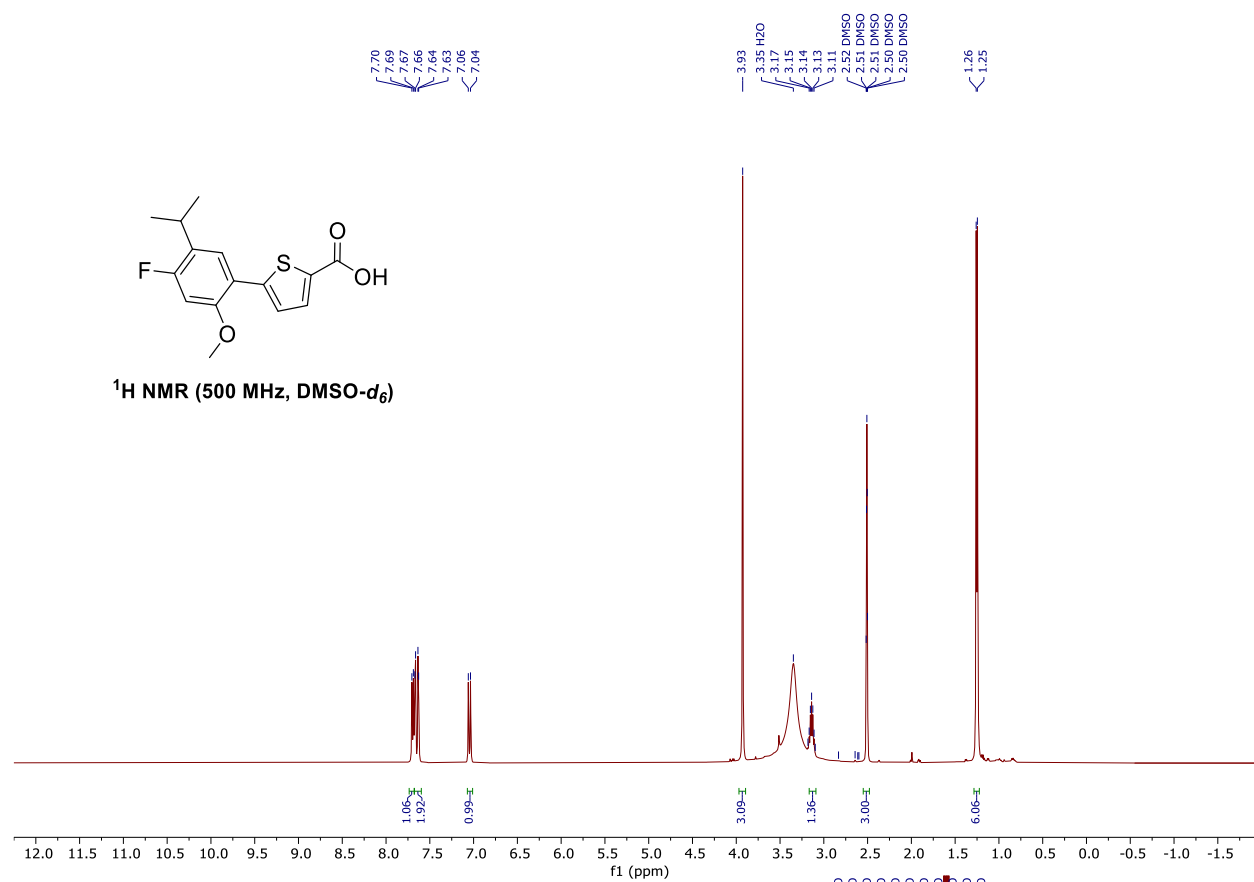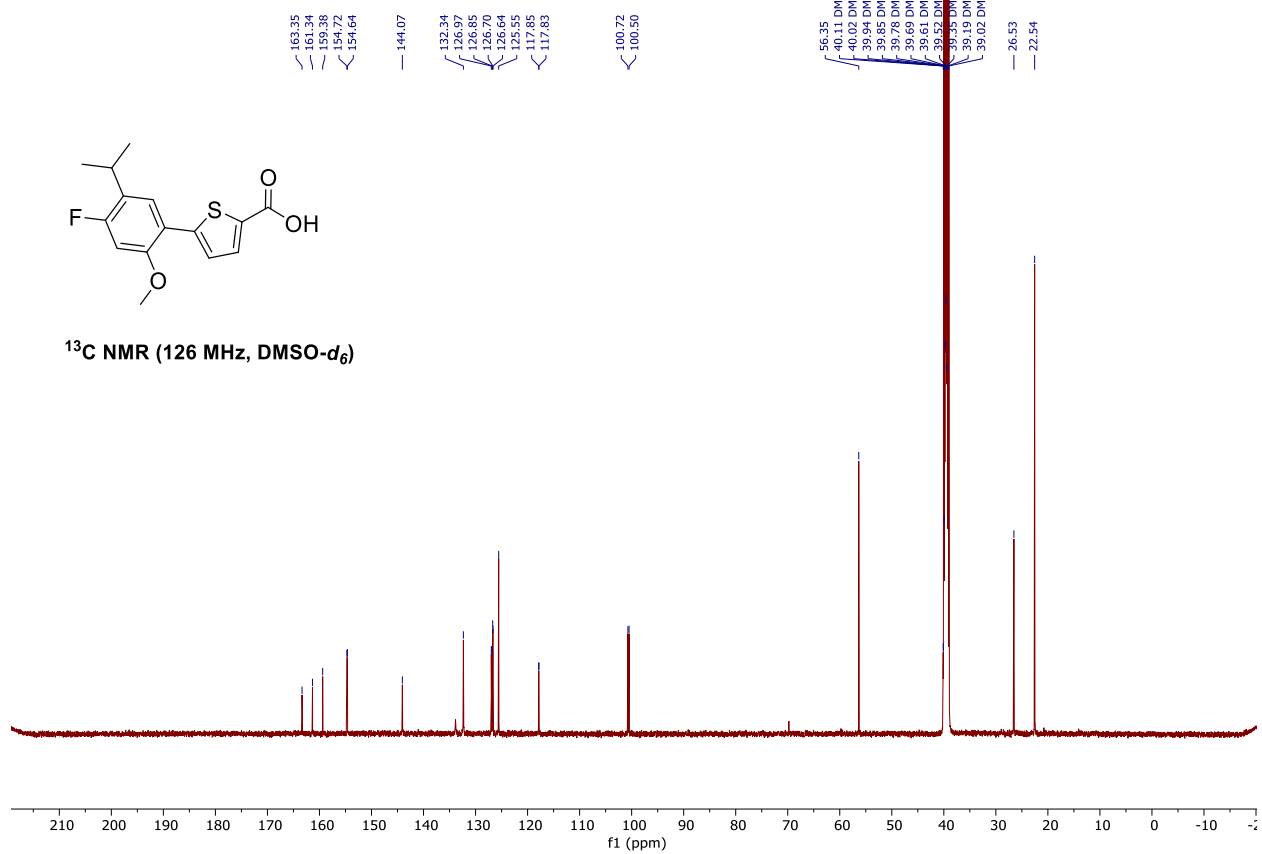

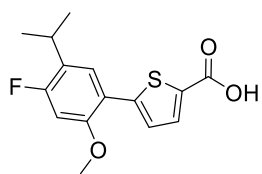

$^{19}\text{F}$  NMR (376 MHz,  $\text{DMSO-}d_6$ )

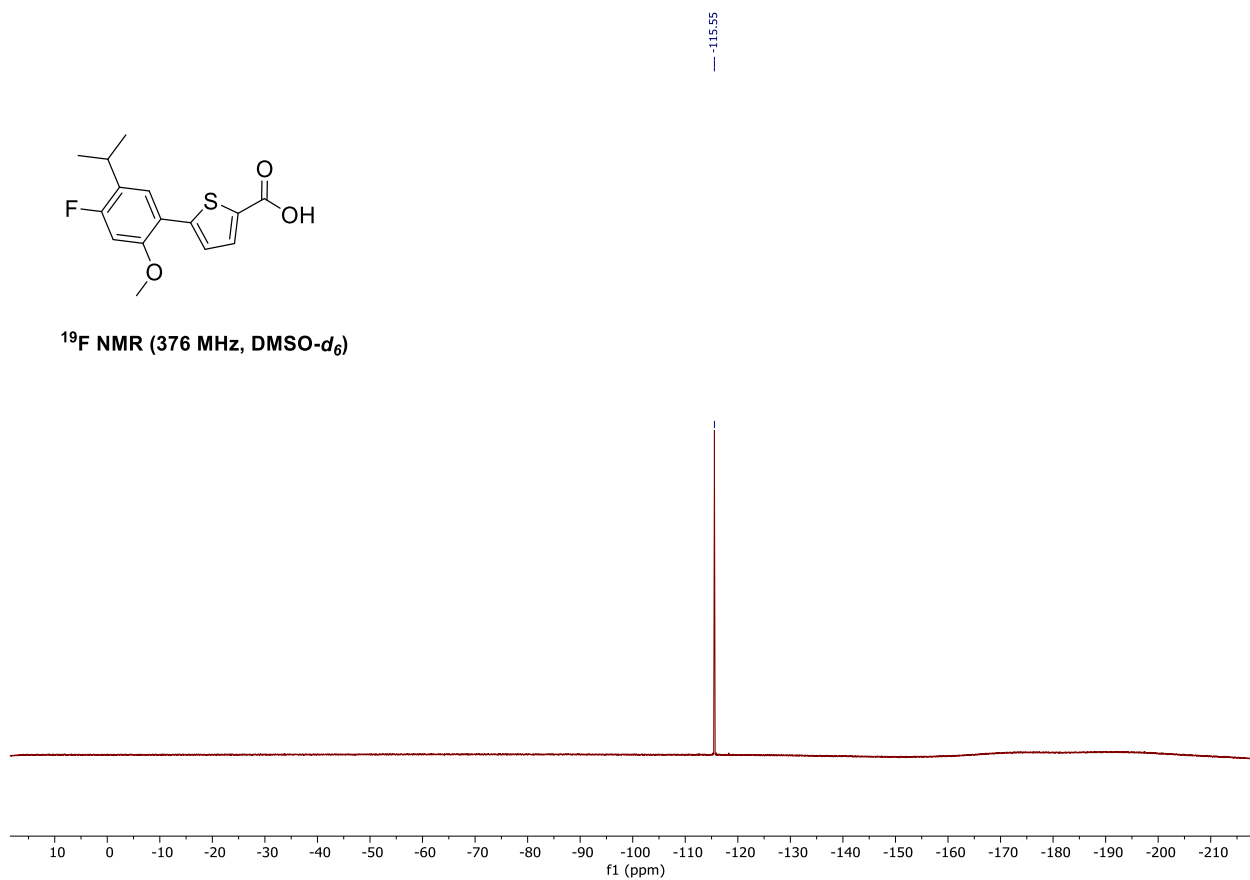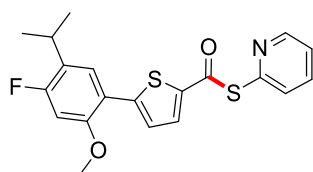

$^1\text{H}$  NMR (400 MHz,  $\text{CDCl}_3$ )

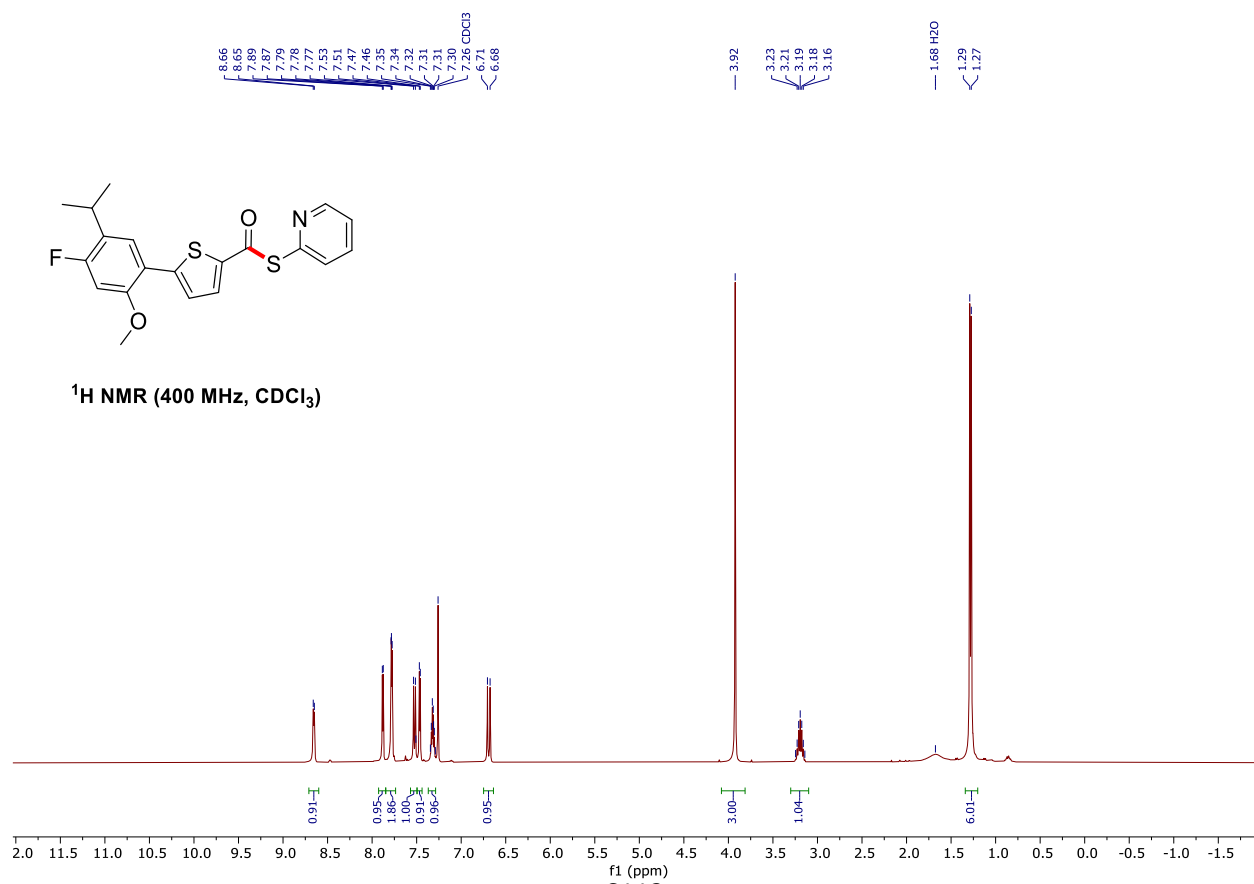

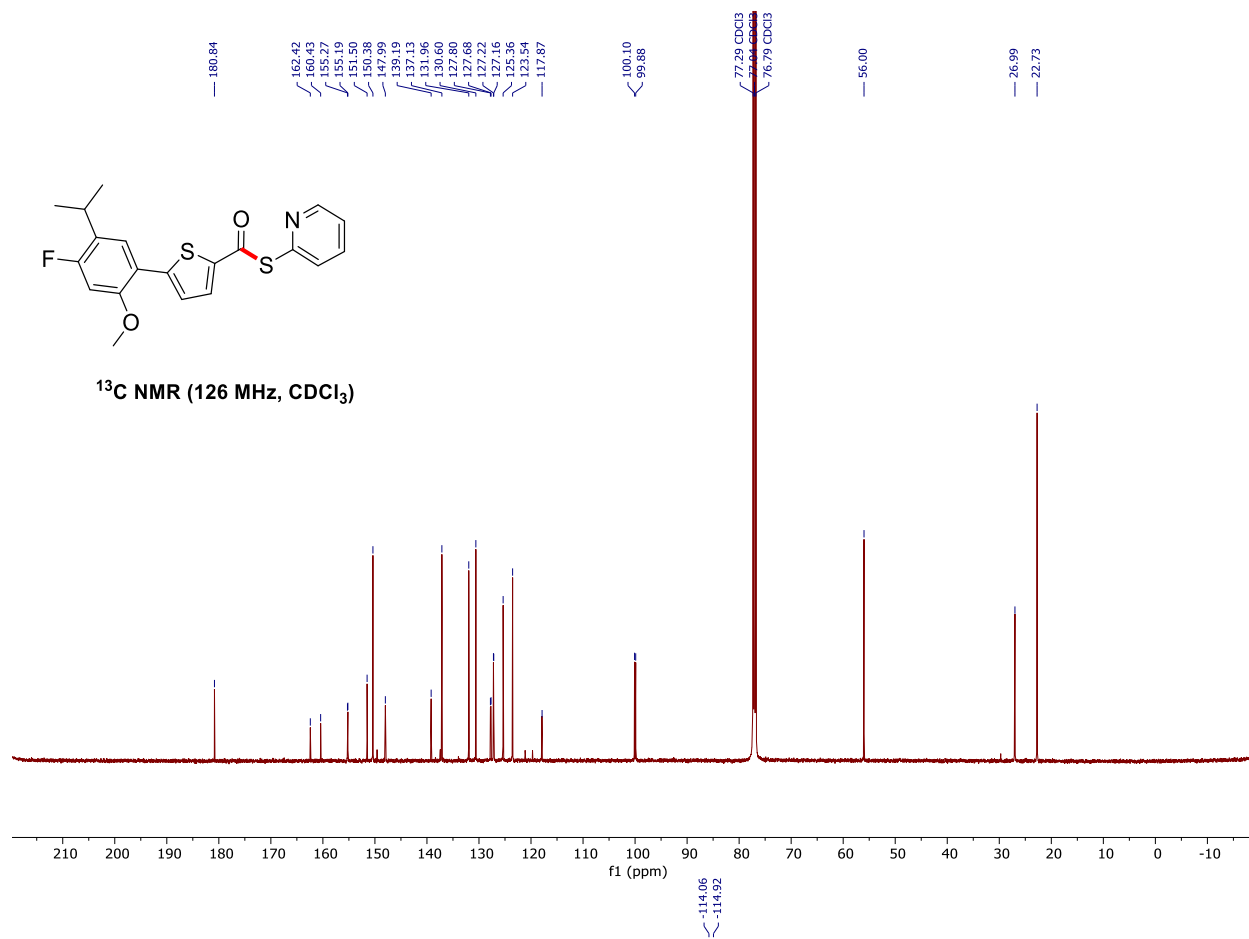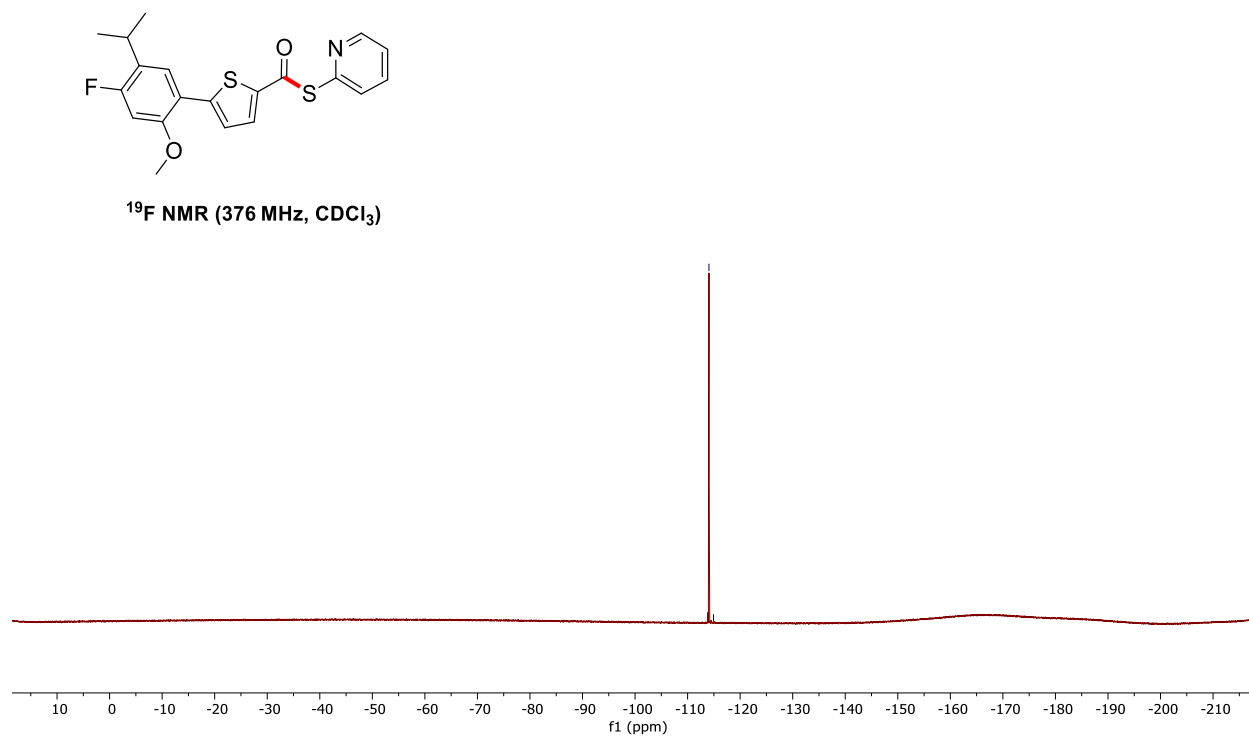

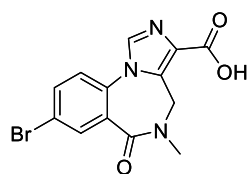

<sup>1</sup>H NMR (500 MHz, DMSO-d<sub>6</sub>)

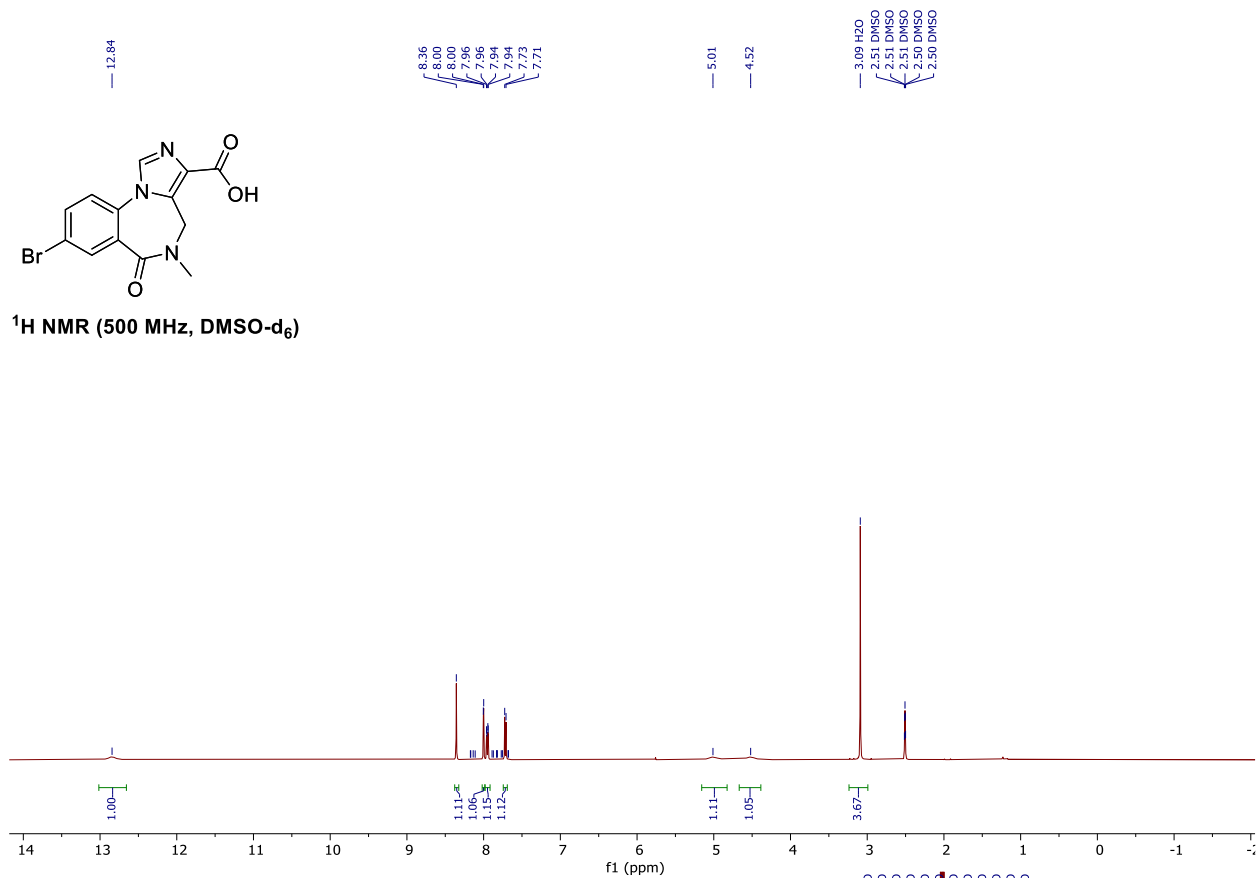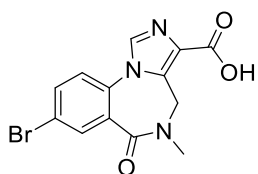

<sup>13</sup>C NMR (126 MHz, DMSO-d<sub>6</sub>)

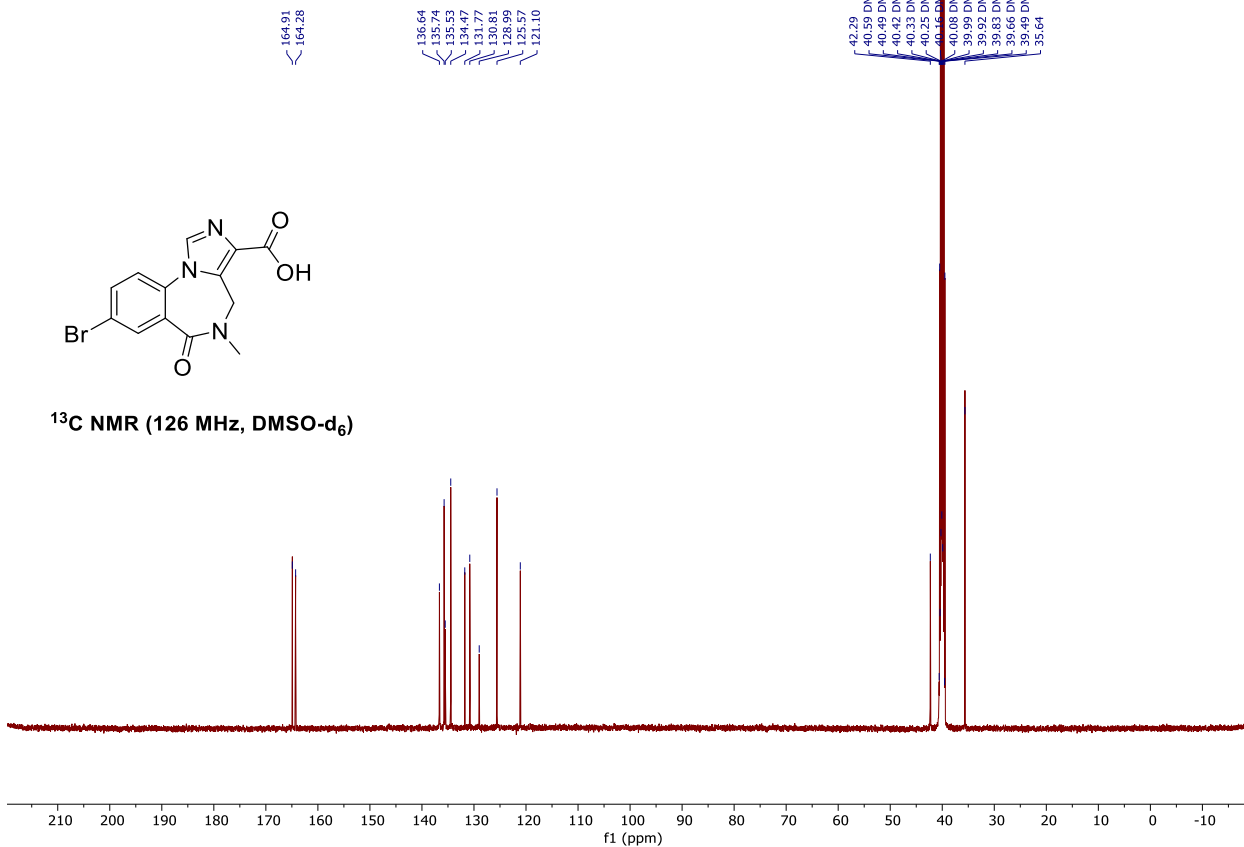

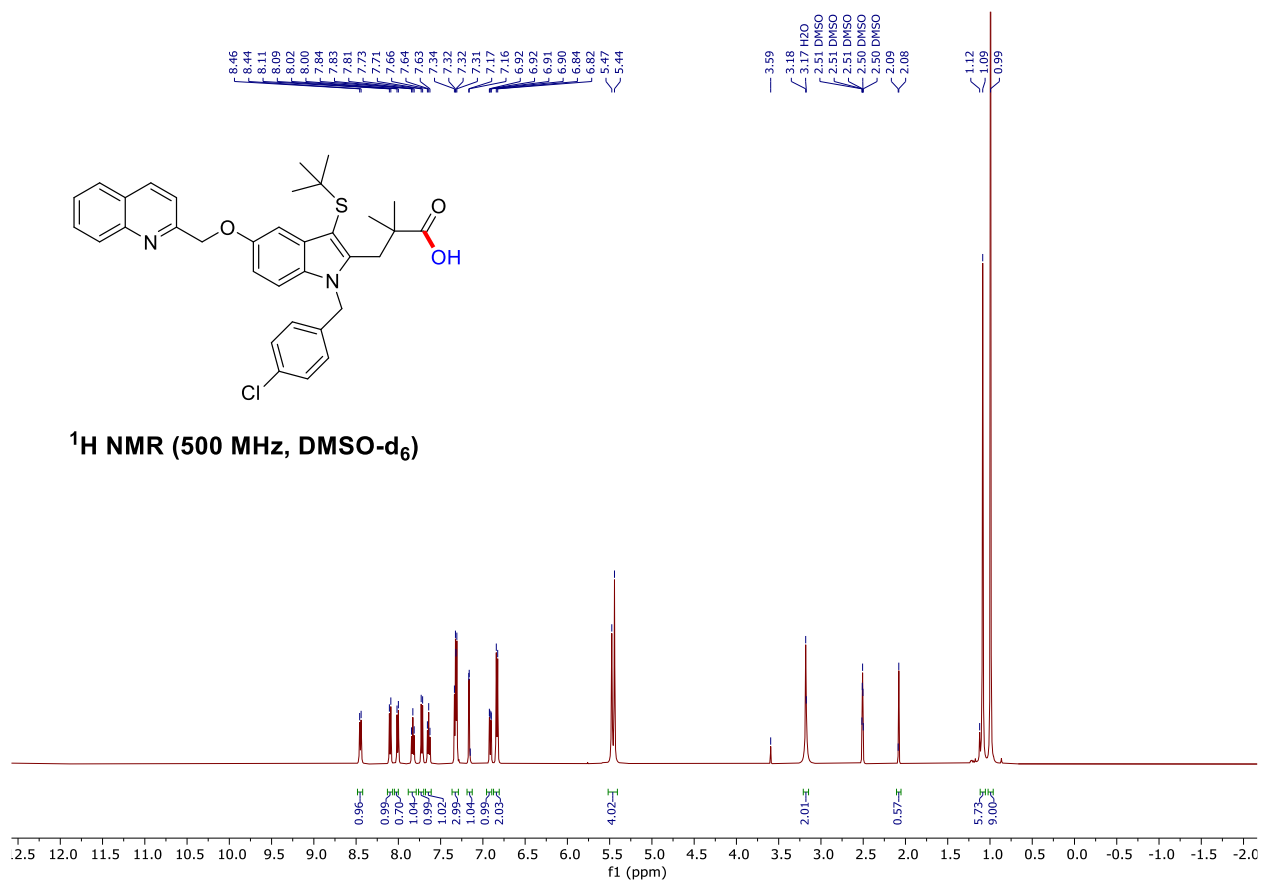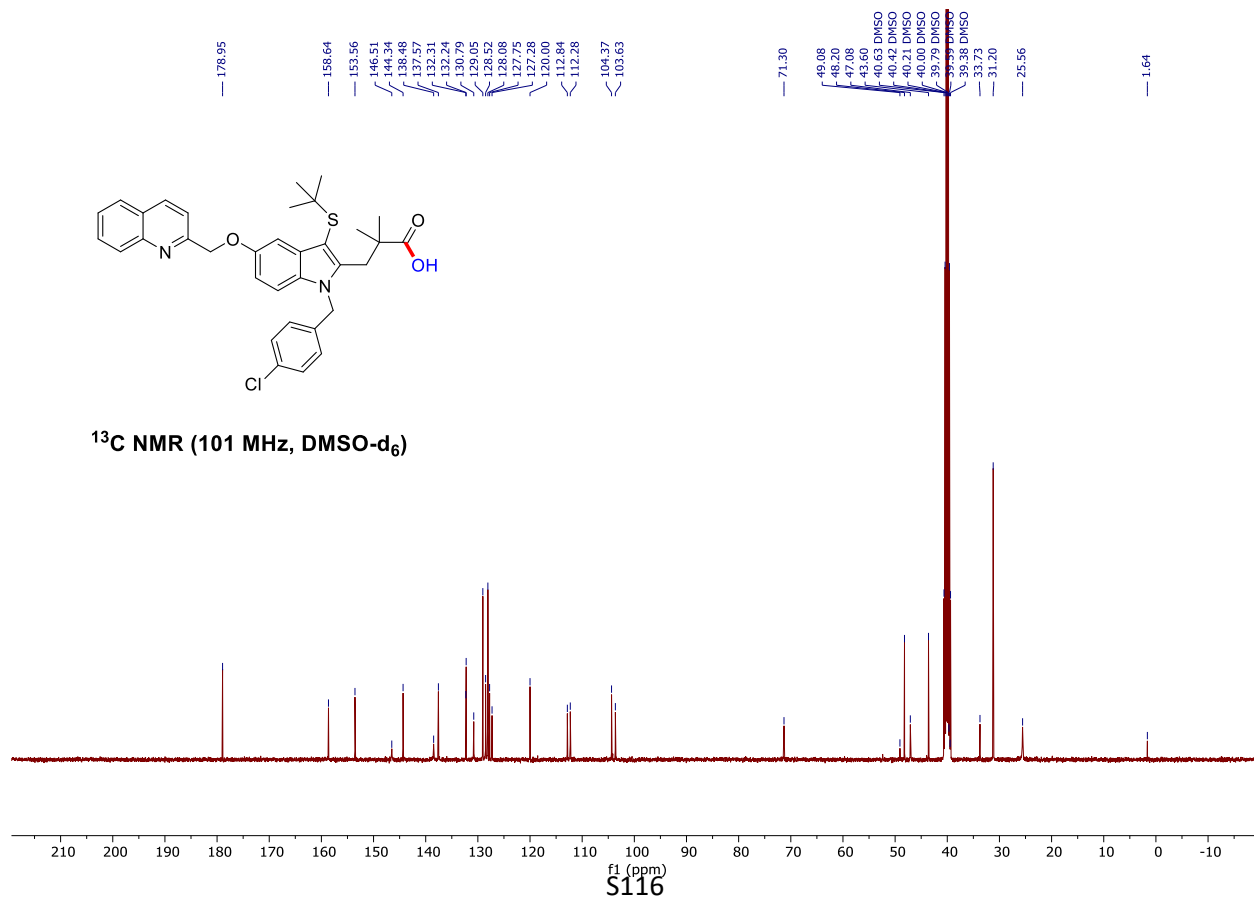

Supplement: SC-014-D3SC00198A-s001 [file SC-014-D3SC00198A-s001.pdf]
